# Supplementary material for: Construction of trisubstituted chromone skeletons carrying electron-withdrawing groups via PhIO-mediated dehydrogenation and its application to the synthesis of frutinone A
Source: publisher site journal article supplement (doi:10.3762/bjoc.15.291), 2019-12-12
Supplement: Additional file 1 [file 1860-5397-15-291-S1.pdf]

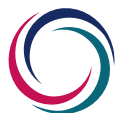

## Supporting Information

for

### **Construction of trisubstituted chromone skeletons carrying electron-withdrawing groups via PhIO-mediated dehydrogenation and its application to the synthesis of frutinone A**

Qiao Li, Chen Zhuang, Donghua Wang, Wei Zhang, Rongxuan Jia, Fengxia Sun, Yilin Zhang and Yunfei Du

*Beilstein J. Org. Chem.* **2019**, *15*, 2958–2965. doi:10.3762/bjoc.15.291

### **Synthetic details and compound characterization data**

---

## CONTENTS:

|                                                      |     |
|------------------------------------------------------|-----|
| 1. General information                               | S2  |
| 2. Experimental section                              | S2  |
| 2.1 Preparation of substrates <b>1</b>               | S2  |
| 2.2 Preparation of compounds <b>2</b>                | S3  |
| 2.3 Preparation of frutinone A                       | S4  |
| 2.4 Preparation of iodosobenzene                     | S4  |
| 3. Spectral data of substrates and products          | S5  |
| 3.1 Spectral data of substrates                      | S5  |
| 3.2 Spectral data of products                        | S18 |
| 4. The HRMS analysis of the PhIO/DMF reaction system | S30 |
| 5. References                                        | S31 |
| 6. $^1\text{H}$ NMR and $^{13}\text{C}$ NMR spectra  | S32 |

---

## 1. General information

All reactions were carried out at room temperature under air unless otherwise stated.  $^1\text{H}$  and  $^{13}\text{C}$  NMR spectra were recorded on a 400 MHz or 600 MHz spectrometer at 25 °C. Chemical shifts values are given in ppm and referred as the internal standard to TMS: 0.00 ppm. The peak patterns are indicated as follows: s, singlet; d, doublet; t, triplet; q, quartet; qui, quintet; m, multiplet and dd, doublet of doublets, brs, broad singlet. The coupling constants  $J$  are reported in Hertz (Hz). High resolution mass spectrometry (HRMS) was obtained on a Q-TOF micro spectrometer. Melting points were determined with a Micromelting point apparatus without corrections. Organic solutions were concentrated by rotary evaporation below 40 °C in vacuum. TLC plates were visualized by exposure to ultraviolet light.

All the chemicals and solvents were purchased from commercial sources and used without further purification, unless otherwise noticed. All reactions were carried out in over-dried glassware. Flash column chromatography was performed over silica gel (200–300 mesh) using a mixture of ethyl acetate (EtOAc), petroleum ether (PE) and dichloromethane (DCM). Before use, iodosobenzene was triturated in 75 mL of chloroform in a beaker, then it was separated by filtration and air-dried. Iodometric titration shows the product to be more than 99% pure [1].

## 2. Experimental section

### 2.1 Preparation of substrates 1

#### General procedure

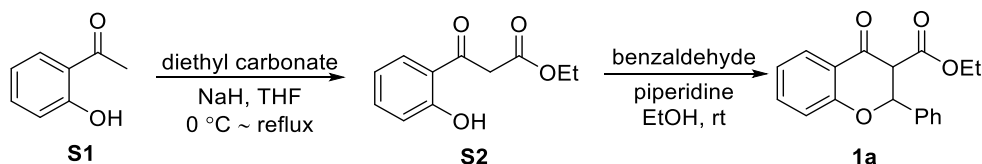

Substrates **1** were prepared adapted from a previously reported procedure [2,3].

To a suspension of ketone (5.0 mmol, 1.0 equiv) in THF (10 mL) was added the ester (10.0 mmol, 2.0 equiv). After the reaction mixture was stirred at 0 °C for about

10 min, NaH (15.0 mmol, 3.0 equiv, 60%) was added at the same temperature. Then the mixture was heated to reflux until TLC indicated the total consumption of the ketone. Removed the solvent in vacuum and the residue was mixed with ice-water (100 mL), acidified with aqueous HCl (3 M) to pH 2–3 and extracted with EtOAc (100 mL  $\times$  3). The combined organic layer was dried over sodium sulfate and evaporated under reduced pressure. The crude product was purified by flash column chromatography (EtOAc/PE = 5/95).

Ester compound thus obtained was dissolved in EtOH (6 mL) followed by addition of benzaldehyde (2.0 mmol, 1.0 equiv). After that, piperidine (0.1 mmol, 20 mmol %) was added to the above ethanol solution. The resulting mixture was stirred at ambient temperature for about 12 h. The solvent was removed in vacuo and the crude product was purified by flash column chromatography (EtOAc/PE = 5/95) to give the desired compounds **1**.

## 2.2 Preparation of compounds **2**

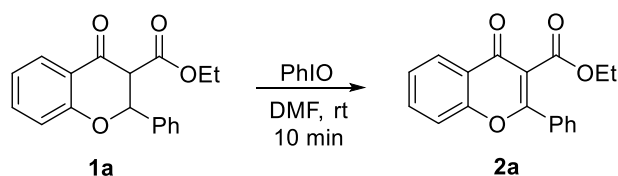

Compound **1a** (1.0 mmol, 1.0 equiv) was dissolved in DMF (4 mL) with stirring at ambient temperature. PhIO (2.0 mmol) was added to the above solution. The resulting mixture was stirred at ambient temperature for about 10 min until TLC indicated that the total consumption of substrate **1a**. Then the mixture was poured into H<sub>2</sub>O (30 mL) and the reaction mixture was extracted with EtOAc (30 mL  $\times$  2). The organic layer was separated and dried over anhydrous sodium sulfate. The solvent was evaporated under reduced pressure, and the crude product was purified by flash column chromatography (EtOAc/PE = 15/85) to give the desired compounds **2a**.

## 2.3 Preparation of frutinone A

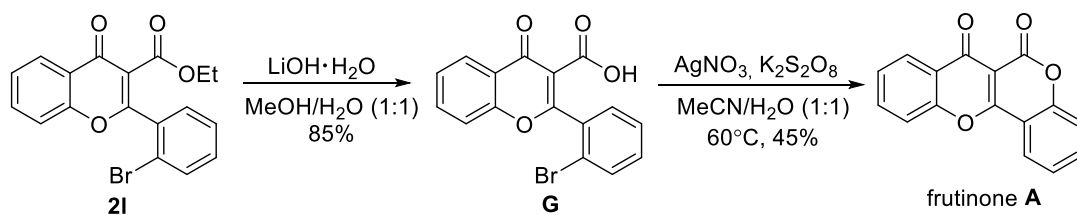

Frutinone **A** was prepared with reference to a previously reported procedure[4].

To a solution containing **2I** (744 mg, 2.0 mmol) in  $\text{MeOH}/\text{H}_2\text{O}$  (6 mL, V:V = 1:1) at rt was added  $\text{LiOH} \cdot \text{H}_2\text{O}$  (840.0 mg, 20.0 mmol). The resulting mixture was stirred for 4 h and organic solvent was removed under reduced pressure. The crude residue was then diluted with  $\text{H}_2\text{O}$  (20 mL) and partitioned with  $\text{EtOAc}$  (20 mL). The aqueous layer was acidified with aq.  $\text{HCl}$  (1 N) to  $\text{pH} \approx 3$  and extracted with  $\text{EtOAc}$  ( $15 \times 3$  mL). The combined organic layer was then washed with a saturated aqueous  $\text{NaCl}$  solution, dried with  $\text{Na}_2\text{SO}_4$ , and concentrated under reduced pressure to give 586 mg (85% yield) of the acid **G** as a yellow solid. Then, to a solution containing acid **G** (345 mg, 1.0 mmol)  $\text{MeCN}/\text{H}_2\text{O}$  (3 mL, V:V = 1:1) solution, were added  $\text{K}_2\text{S}_2\text{O}_8$  (714 mg, 3 mmol) and  $\text{AgNO}_3$  (17 mg, 0.01 mmol). The solution mixture was heated at  $60^\circ\text{C}$  for 15 h, cooled to rt, and quenched with a saturated aqueous  $\text{NaHCO}_3$  solution (10 mL). After stirring for additional 15 mins, the mixture was extracted with a  $\text{iPrOH}/\text{CH}_2\text{Cl}_2$  ( $10 \times 3$  mL, V:V = 1:3) solution. The combined organic layer was then washed with a saturated aqueous  $\text{NaCl}$  solution, dried with  $\text{Na}_2\text{SO}_4$ , and concentrated under reduced pressure. The crude residue was pre-absorbed on silica gel and purified by flash silica gel column chromatography using ( $\text{EtOAc}/\text{PE} = 20/80$ ) as an eluent to give 119 mg (45%) of frutinone **A**.

## 2.4 Preparation of iodosobenzene

Finely ground iodosobenzene diacetate (32.2 g, 0.10 mol) is placed in a 250 mL beaker, and aq.  $\text{NaOH}$  (3 N, 150 mL) is added over a 5-min period with vigorous stirring. The lumps of solid that formed are triturated with a stirring rod or spatula for

15 min, and the reaction mixture stands for an additional 45 min. Then H<sub>2</sub>O (100 mL) is added, and the mixture is stirred vigorously. The crude solid iodosobenzene is collected on a Büchner funnel. The wet solid is returned to the beaker and triturated in H<sub>2</sub>O (200 mL). The solid is again collected on the Büchner funnel, washed there with H<sub>2</sub>O (200 mL), and dried by maintaining suction. Final purification is effected by triturating the dried solid in CHCl<sub>3</sub> (75 mL) in a flask. The resulting iodosobenzene is separated by filtration and air-dried as a pure yellow solid, 20.2 g (92%); m.p. 210–212 °C.

### 3. Spectral data of substrates and products

#### 3.1 Spectral data of substrates

##### Ethyl 4-oxo-2-phenylchromane-3-carboxylate (**1a**)

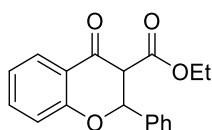

Following the general procedure, **1a** was purified by silica gel chromatography (5% EtOAc/PE). Yield: 523 mg, 82%, a white solid, mp. 93 – 94 °C. <sup>1</sup>H NMR (600 MHz, CDCl<sub>3</sub>) δ 7.96 (dd, *J* = 7.8, 1.6 Hz, 1H), 7.57 – 7.52 (m, 1H), 7.51 (dd, *J* = 7.8, 1.6 Hz, 2H), 7.45 – 7.39 (m, 3H), 7.09 (t, *J* = 7.6 Hz, 1H), 7.04 (d, *J* = 8.4 Hz, 1H), 5.69 (d, *J* = 12.4 Hz, 1H), 4.13 – 4.08 (m, 2H), 1.10 (t, *J* = 7.2 Hz, 3H). <sup>13</sup>C NMR (151 MHz, CDCl<sub>3</sub>) δ 187.8, 167.0, 161.1, 136.7, 136.5, 129.5, 128.8, 127.5, 127.4, 122.1, 120.0, 118.2, 81.4, 61.5, 59.8, 14.0. HRMS (ESI) calcd for C<sub>18</sub>H<sub>16</sub>NaO<sub>4</sub><sup>+</sup> [*M* + Na<sup>+</sup>] 319.0941, found 319.0941.

##### Ethyl 6-fluoro-4-oxo-2-phenylchromane-3-carboxylate (**1b**)

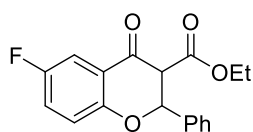

Following the general procedure, **1b** was purified by silica gel chromatography (5% EtOAc/PE). Yield: 459 mg, 68%, a white solid, mp. 100 – 102 °C. <sup>1</sup>H NMR (600 MHz, CDCl<sub>3</sub>) δ 12.29 (s, 1H), 7.39 – 7.31 (m, 3H), 7.31 – 7.25 (m, 3H), 6.95 (td, *J* = 8.5, 3.2 Hz, 1H), 6.75 (dd, *J* = 8.8, 4.4 Hz, 1H), 6.23 (s, 1H), 4.82 – 3.52 (m, 2H), 1.22 (t, *J* = 7.2 Hz, 3H). <sup>13</sup>C NMR (150 MHz, CDCl<sub>3</sub>) δ 170.2, 161.8, 158.0, 156.5, 151.7, 139.9, 128.5, 128.4, 127.4, 127.1, 120.0 (<sup>2</sup>*J*<sub>C-F</sub> = 23.61), 118.4 (<sup>3</sup>*J*<sub>C-F</sub> = 7.665), 110.7, 110.5, 95.4, 74.9, 61.1, 14.1. HRMS (ESI) calcd for C<sub>18</sub>H<sub>15</sub>FN<sub>4</sub>O<sub>4</sub><sup>+</sup> [*M* + Na<sup>+</sup>] 337.0847, found 337.0848.

#### Ethyl 6-bromo-4-oxo-2-phenylchromane-3-carboxylate (**1c**)

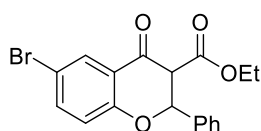

Following the general procedure, **1c** was purified by silica gel chromatography (5% EtOAc/PE). Yield: 579 mg, 73%, a white solid, mp. 84 – 86 °C. <sup>1</sup>H NMR (600 MHz, CDCl<sub>3</sub>) δ 12.29 (s, 1H), 7.79 (d, *J* = 2.6 Hz, 1H), 7.38 – 7.31 (m, 3H), 7.30 – 7.26 (m, 3H), 6.68 (d, *J* = 8.7 Hz, 1H), 6.24 (s, 1H), 4.87 – 3.90 (m, 2H), 1.21 (t, *J* = 7.2 Hz, 3H). <sup>13</sup>C NMR (150 MHz, CDCl<sub>3</sub>) δ 170.0, 161.4, 154.7, 139.8, 135.8, 128.6, 128.4, 127.1, 127.1, 119.5, 119.0, 113.5, 95.3, 75.2, 61.1, 14.1. HRMS (ESI) calcd for C<sub>18</sub>H<sub>15</sub><sup>79</sup>BrNaO<sub>4</sub><sup>+</sup> [*M* + Na<sup>+</sup>] 397.0046, found 397.0047.

#### Ethyl 6-chloro-4-oxo-2-phenylchromane-3-carboxylate (**1d**)

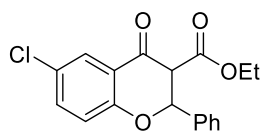

Following the general procedure, **1d** was purified by silica gel chromatography (5% EtOAc/PE). Yield: 530 mg, 75%, a white solid, mp. 90 – 92 °C. <sup>1</sup>H NMR (600 MHz, CDCl<sub>3</sub>) δ 12.29 (s, 1H), 7.64 (d, *J* = 2.6 Hz, 1H), 7.35-7.31 (m, 2H), 7.31 – 7.26 (m, 3H), 7.20 (dd, *J* = 8.8, 2.6 Hz, 1H), 6.74 (d, *J* = 8.8 Hz, 1H), 6.24 (s, 1H), 4.96 – 3.26

(m, 2H), 1.21 (t,  $J = 7.2$  Hz, 3H).  $^{13}\text{C}$  NMR (150 MHz,  $\text{CDCl}_3$ )  $\delta$  170.1, 161.5, 154.3, 139.9, 133.0, 128.6, 128.5, 127.1, 126.4, 124.1, 119.0, 118.6, 95.4, 75.2, 61.1, 14.2. HRMS (ESI) calcd for  $\text{C}_{18}\text{H}_{15}^{35}\text{ClNaO}_4^+$  [ $\text{M} + \text{Na}^+$ ] 353.0551, found 353.0551.

#### Ethyl 6-cyano-4-oxo-2-phenylchromane-3-carboxylate (**1e**)

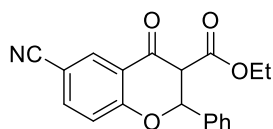

Following the general procedure, **1e** was purified by silica gel chromatography (5% EtOAc/PE). Yield: 536 mg, 78%, a light yellow solid, mp. 156 – 158 °C.  $^1\text{H}$  NMR (600 MHz,  $\text{CDCl}_3$ )  $\delta$  8.25 (s, 1H), 7.75 (dd,  $J = 8.8, 2.0$  Hz, 1H), 7.48 (m, 2H), 7.44 (m, 3H), 7.15 (d,  $J = 8.6$  Hz, 1H), 5.77 (d,  $J = 12.0$  Hz, 1H), 4.13–4.11 (m, 1H), 4.11 – 4.08 (m, 2H), 1.10 (t,  $J = 7.0$  Hz, 3H).  $^{13}\text{C}$  NMR (150 MHz,  $\text{CDCl}_3$ )  $\delta$  185.9, 166.1, 163.4, 138.9, 135.4, 132.6, 129.9, 129.0, 127.4, 120.3, 119.8, 117.7, 106.1, 81.8, 61.9, 59.0, 13.9. HRMS (ESI) calcd for  $\text{C}_{19}\text{H}_{15}\text{NNaO}_4^+$  [ $\text{M} + \text{Na}^+$ ] 344.0893, found 344.0894.

#### Ethyl 7-nitro-4-oxo-2-phenylchromane-3-carboxylate (**1f**)

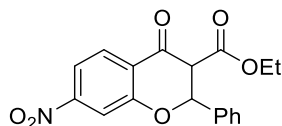

Following the general procedure, **1f** was purified by silica gel chromatography (5% EtOAc/PE). Yield: 604 mg, 83%, a yellow solid, mp. 100 – 102 °C.  $^1\text{H}$  NMR (600 MHz,  $\text{CDCl}_3$ )  $\delta$  12.33 (s, 1H), 8.59 (d,  $J = 3.0$  Hz, 1H), 8.14 (dd,  $J = 9.2, 3.0$  Hz, 1H), 7.79 – 7.09 (m, 5H), 6.87 (d,  $J = 9.0$  Hz, 1H), 6.36 (s, 1H), 4.27 – 4.19 (m, 2H), 1.21 (t,  $J = 7.2$  Hz, 3H).  $^{13}\text{C}$  NMR (150 MHz,  $\text{CDCl}_3$ )  $\delta$  169.6, 160.6, 160.1, 141.9, 139.3, 129.08, 128.7, 128.4, 127.1, 120.8, 117.7, 117.6, 95.8, 76.6, 61.4, 14.1. HRMS (ESI) calcd for  $\text{C}_{18}\text{H}_{15}\text{NNaO}_6^+$  [ $\text{M} + \text{Na}^+$ ] 364.0792, found 364.0792.



---

**Ethyl 8-chloro-4-oxo-2-phenylchromane-3-carboxylate (1g)**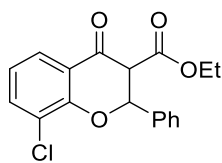

Following the general procedure, **1g** was purified by silica gel chromatography (5% EtOAc/PE). Yield: 607 mg, 86%, a white solid, mp. 106 – 108 °C. <sup>1</sup>H NMR (600 MHz, CDCl<sub>3</sub>) δ 12.35 (s, 1H), 7.57 (dd, *J* = 7.8, 1.8 Hz, 1H), 7.40 (d, *J* = 7.2 Hz, 1H), 7.33 (dd, *J* = 8.0, 1.4 Hz, 2H), 7.31 – 7.24 (m, 3H), 6.88 (t, *J* = 7.8 Hz, 1H), 6.40 (s, 1H), 4.38 – 4.20 (m, 2H), 1.25 (t, *J* = 7.2 Hz, 3H). <sup>13</sup>C NMR (150 MHz, CDCl<sub>3</sub>) δ 170.2, 162.3, 151.5, 139.8, 133.4, 128.4, 128.4, 126.9, 123.0, 122.1, 121.6, 119.6, 94.7, 75.0, 61.1, 14.2. HRMS (ESI) calcd for C<sub>18</sub>H<sub>15</sub><sup>35</sup>ClNaO<sub>4</sub><sup>+</sup> [M + Na<sup>+</sup>] 353.0551, found 353.0551.

**Ethyl 6-methyl-4-oxo-2-phenylchromane-3-carboxylate (1h)**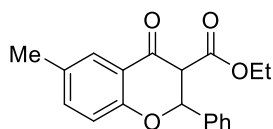

Following the general procedure, **1h** was purified by silica gel chromatography (5% EtOAc/PE). Yield: 576 mg, 87%, a white solid, mp. 76 – 78 °C. <sup>1</sup>H NMR (600 MHz, CDCl<sub>3</sub>) δ 7.73 (s, 1H), 7.50 (d, *J* = 6.4 Hz, 2H), 7.44 – 7.38 (m, 3H), 7.34 (s, 1H), 6.94 (d, *J* = 8.4 Hz, 1H), 5.65 (d, *J* = 12.6 Hz, 1H), 4.10 (q, *J* = 7.2 Hz, 2H), 4.05 (d, *J* = 12.4 Hz, 1H), 2.33 (s, 3H), 1.09 (t, *J* = 7.2 Hz, 3H). <sup>13</sup>C NMR (150 MHz, CDCl<sub>3</sub>) δ 187.9, 167.1, 159.2, 137.8, 136.7, 131.6, 129.4, 128.8, 127.4, 127.0, 119.6, 118.0, 81.4, 61.4, 59.9, 20.5, 13.9. HRMS (ESI) calcd for C<sub>19</sub>H<sub>18</sub>NaO<sub>4</sub><sup>+</sup> [M + Na<sup>+</sup>] 333.1097, found 333.1098.

**Ethyl 7-methoxy-4-oxo-2-phenylchromane-3-carboxylate (1i)**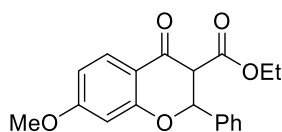

Following the general procedure, **1i** was purified by silica gel chromatography (5% EtOAc/PE). Yield: 621 mg, 89%, a white solid, mp. 102 – 104 °C. <sup>1</sup>H NMR (600 MHz, DMSO) δ 7.75 (d, *J* = 8.8 Hz, 1H), 7.61 – 7.54 (m, 2H), 7.46 – 7.27 (m, 3H), 6.72 (dd, *J* = 8.8, 2.4 Hz, 1H), 6.66 (d, *J* = 2.4 Hz, 1H), 5.69 (d, *J* = 12.4 Hz, 1H), 4.58 (d, *J* = 12.4 Hz, 1H), 4.09 – 3.93 (m, 2H), 3.82 (s, 3H), 0.96 (t, *J* = 7.3 Hz, 1H). <sup>13</sup>C NMR (150 MHz, DMSO) δ 186.4, 167.0, 166.2, 162.8, 136.5, 129.3, 128.5, 128.4, 127.9, 113.1, 110.7, 101.0, 81.0, 60.6, 58.1, 56.0, 13.8. HRMS (ESI) calcd for C<sub>19</sub>H<sub>18</sub>NaO<sub>5</sub><sup>+</sup> [*M* + Na<sup>+</sup>] 349.1046, found 349.1046.

**Ethyl 1-oxo-3-phenyl-2,3-dihydro-1*H*-benzo[*f*]chromene-2-carboxylate (**1j**)**

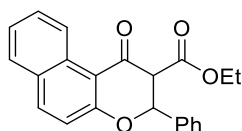

Following the general procedure, **1j** was purified by silica gel chromatography (5% EtOAc/PE). Yield: 575 mg, 78%, a yellow solid, mp. 110 – 112 °C. <sup>1</sup>H NMR (600 MHz, CDCl<sub>3</sub>) δ 9.45 (dd, *J* = 8.6, 3.2 Hz, 1H), 7.96 (d, *J* = 9.0 Hz, 1H), 7.77 (d, *J* = 7.9 Hz, 1H), 7.65 (dd, *J* = 8.4, 7.4 Hz, 1H), 7.54 (d, *J* = 7.6 Hz, 2H), 7.49 – 7.38 (m, 4H), 7.13 (d, *J* = 9.0 Hz, 1H), 5.82 (d, *J* = 12.6 Hz, 1H), 4.20 (d, *J* = 12.6 Hz, 1H), 4.18 – 4.08 (m, 2H), 1.13 (td, *J* = 7.2, 2.2 Hz, 3H). <sup>13</sup>C NMR (151 MHz, CDCl<sub>3</sub>) δ 188.7, 167.4, 163.4, 138.3, 136.4, 131.4, 130.1, 129.5, 129.4, 128.9, 128.6, 127.4, 125.8, 125.3, 118.6, 111.7, 81.2, 61.5, 60.5, 14.0. HRMS (ESI) calcd for C<sub>22</sub>H<sub>18</sub>NaO<sub>4</sub><sup>+</sup> [*M* + Na<sup>+</sup>] 369.1097, found 369.1097.

**Ethyl 2-(2-chlorophenyl)-4-oxochromane-3-carboxylate (**1k**)**

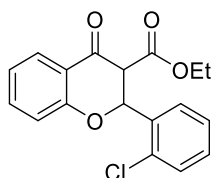

Following the general procedure, **1k** was purified by silica gel chromatography (5% EtOAc/PE). Yield: 551 mg, 78%, a white solid, mp. 72 – 74 °C. <sup>1</sup>H NMR (600 MHz,

CDCl<sub>3</sub>)  $\delta$  12.38 (s, 1H), 7.72 (d,  $J$  = 7.8 Hz, 1H), 7.44 – 7.39 (m, 1H), 7.29 (d,  $J$  = 7.7 Hz, 1H), 7.25 (dd,  $J$  = 10.2, 5.4 Hz, 1H), 7.21 (t,  $J$  = 7.8 Hz, 1H), 7.11 (t,  $J$  = 7.6 Hz, 1H), 6.96 (t,  $J$  = 7.5 Hz, 1H), 6.79 – 6.71 (m, 2H), 4.25 – 3.97 (m, 2H), 1.15 (t,  $J$  = 7.2 Hz, 3H). <sup>13</sup>C NMR (150 MHz, CDCl<sub>3</sub>)  $\delta$  163.1, 155.4, 136.8, 133.9, 133.4, 130.0, 129.9, 128.8, 126.8, 124.3, 121.3, 117.4, 117.2, 93.6, 71.5, 60.9, 14.0. HRMS (ESI) calcd for C<sub>18</sub>H<sub>15</sub><sup>35</sup>ClNaO<sub>4</sub><sup>+</sup> [ $M$  + Na<sup>+</sup>] 353.0551, found 353.0551.

#### Ethyl 2-(2-bromophenyl)-4-oxochromane-3-carboxylate (**1l**)

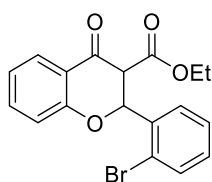

Following the general procedure, **1l** was purified by silica gel chromatography (5% EtOAc/PE). Yield: 635 mg, 80%, a white solid, mp. 78 – 80 °C. <sup>1</sup>H NMR (600 MHz, CDCl<sub>3</sub>)  $\delta$  12.38 (s, 1H), 7.71 (dd,  $J$  = 7.8, 1.5 Hz, 1H), 7.60 (dd,  $J$  = 7.6, 1.4 Hz, 1H), 7.28 (dd,  $J$  = 7.6, 1.8 Hz, 1H), 7.27 – 7.21 (m, 1H), 7.16 – 7.11 (m, 2H), 6.96 (t,  $J$  = 7.6 Hz, 1H), 6.77 – 6.68 (m, 2H), 4.31 – 4.01 (m, 2H), 1.15 (t,  $J$  = 7.2 Hz, 3H). <sup>13</sup>C NMR (150 MHz, CDCl<sub>3</sub>)  $\delta$  170.0, 163.1, 155.3, 138.4, 133.4, 133.3, 130.2, 129.0, 127.5, 124.3, 124.2, 121.3, 117.4, 117.3, 93.8, 74.0, 60.9, 14.0. HRMS (ESI) calcd for C<sub>18</sub>H<sub>15</sub><sup>79</sup>BrNaO<sub>4</sub><sup>+</sup> [ $M$  + Na<sup>+</sup>] 397.0046, found 397.0046.

#### Ethyl 2-(4-fluorophenyl)-4-oxochromane-3-carboxylate (**1m**)

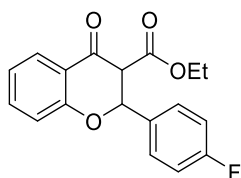

Following the general procedure, **1m** was purified by silica gel chromatography (5% EtOAc/PE). Yield: 472 mg, 70%, a white solid, mp. 66 – 68 °C. Major isomer: <sup>1</sup>H NMR (600 MHz, CDCl<sub>3</sub>)  $\delta$  7.96 (dd,  $J$  = 7.9, 1.7 Hz, 1H), 7.55 (dt,  $J$  = 8.6, 7.4 Hz, 1H), 7.53 – 7.47 (m, 2H), 7.31 – 7.26 (m, 1H), 7.15 – 7.08 (m, 2H), 7.03 (d,  $J$  = 8.0 Hz, 1H), 6.79

(dd,  $J = 8.2, 0.8$  Hz, 1H), 5.67 (d,  $J = 12.6$  Hz, 1H), 4.16 – 4.08 (m, 2H), 1.12 (t,  $J = 7.2$  Hz, 3H).  $^{13}\text{C}$  NMR (150 MHz,  $\text{CDCl}_3$ )  $\delta$  187.6, 164.0, 162.4, 161.0, 136.8, 133.4, 129.4 ( $^3J_{\text{C-F}} = 8.385$ ), 129.0, 127.6, 122.2, 118.1, 117.2, 115.2 ( $^2J_{\text{C-F}} = 31.845$ ), 80.6, 61.6, 59.9, 14.0. Minor isomer:  $^1\text{H}$  NMR (600 MHz,  $\text{CDCl}_3$ )  $\delta$  12.35 (s, 1H), 7.68 (dd,  $J = 7.8, 1.6$  Hz, 1H), 7.36 – 7.31 (m, 2H), 7.11 – 7.08 (m, 2H), 7.00 – 6.93 (m, 3H), 6.22 (s, 1H), 4.28 – 4.18 (m, 2H), 1.22 (t,  $J = 7.2$  Hz, 3H).  $^{13}\text{C}$  NMR (150 MHz,  $\text{CDCl}_3$ )  $\delta$  166.9, 164.0, 163.5, 161.8, 161.0, 155.5, 136.2, 132.5, 129.3 ( $^3J_{\text{C-F}} = 11.295$ ), 128.9, 124.5, 121.4, 119.9, 117.7, 115.8 ( $^2J_{\text{C-F}} = 21.54$ ), 115.3, 74.2, 60.9, 14.2. HRMS (ESI) calcd for  $\text{C}_{18}\text{H}_{15}\text{FNaO}_4^+$  [ $\text{M} + \text{Na}^+$ ] 337.0847, found 337.0846.

#### Ethyl 4-oxo-2-(*p*-tolyl)chromane-3-carboxylate (**1n**)

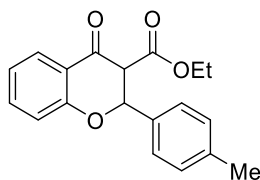

Following the general procedure, **1n** was purified by silica gel chromatography (5% EtOAc/PE). Yield: 506 mg, 76%, a white solid, mp. 126 – 128 °C.  $^1\text{H}$  NMR (600 MHz,  $\text{CDCl}_3$ )  $\delta$  7.95 (dd,  $J = 7.8, 1.2$  Hz, 1H), 7.53 (t,  $J = 7.8$  Hz, 1H), 7.39 (d,  $J = 8.0$  Hz, 2H), 7.22 (d,  $J = 7.8$  Hz, 2H), 7.08 (t,  $J = 7.5$  Hz, 1H), 7.02 (d,  $J = 8.3$  Hz, 1H), 5.65 (d,  $J = 12.4$  Hz, 1H), 4.15–4.11 (m, 2H), 4.09 – 4.05 (m, 1H), 2.37 (s, 3H), 1.12 (t,  $J = 7.2$  Hz, 3H).  $^{13}\text{C}$  NMR (150 MHz,  $\text{CDCl}_3$ )  $\delta$  188.0, 167.0, 161.2, 139.4, 136.7, 133.6, 129.5, 127.5, 127.3, 122.0, 120.0, 118.2, 81.2, 61.5, 59.7, 21.3, 14.0. HRMS (ESI) calcd for  $\text{C}_{19}\text{H}_{18}\text{NaO}_4^+$  [ $\text{M} + \text{Na}^+$ ] 333.1097, found 333.1097.

#### Ethyl 2-(naphthalen-2-yl)-4-oxochromane-3-carboxylate (**1o**)

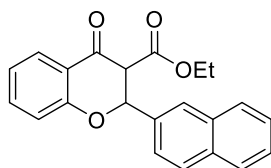

Following the general procedure, **1o** was purified by silica gel chromatography (5% EtOAc/PE). Yield: 635 mg, 86%, a white solid, mp. 118 – 120 °C. <sup>1</sup>H NMR (600 MHz, CDCl<sub>3</sub>) δ 12.56 (s, 1H), 8.60 (t, *J* = 11.8 Hz, 1H), 7.86 (dd, *J* = 8.2, 3.2 Hz, 1H), 7.79 – 7.71 (m, 2H), 7.66 (dd, *J* = 14.2, 6.4 Hz, 1H), 7.56 – 7.52 (m, 1H), 7.46 – 7.34 (m, 1H), 7.29 (td, *J* = 7.7, 2.4 Hz, 1H), 7.12 (td, *J* = 8.4, 1.7 Hz, 1H), 7.10 – 7.04 (m, 1H), 6.9–6.89 (m, 1H), 6.60 (t, *J* = 7.2 Hz, 1H), 4.26 – 3.94 (m, 2H), 1.06 (td, *J* = 7.2, 1.4 Hz, 3H). <sup>13</sup>C NMR (151 MHz, CDCl<sub>3</sub>) δ 170.4, 163.9, 155.6, 134.5, 134.1, 133.1, 131.8, 129.5, 128.7, 126.5, 125.8, 125.6, 124.9, 124.5, 124.4, 121.3, 118.0, 117.3, 93.4, 71.4, 60.8, 14.1. HRMS (ESI) calcd for C<sub>22</sub>H<sub>18</sub>NaO<sub>4</sub><sup>+</sup> [*M* + Na<sup>+</sup>] 369.1097, found 369.1097.

**Ethyl 2-(2-methoxyphenyl)-4-oxochromane-3-carboxylate (1p)**

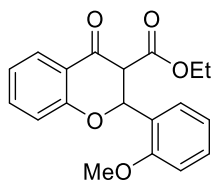

Following the general procedure, **1p** was purified by silica gel chromatography (5% EtOAc/PE). Yield: 558 mg, 80%, a white solid, mp. 132 – 134 °C. <sup>1</sup>H NMR (600 MHz, CDCl<sub>3</sub>) δ 7.75 (d, *J* = 8.8 Hz, 1H), 7.62 – 7.54 (m, 2H), 7.48 – 7.38 (m, 3H), 6.72 (dd, *J* = 8.8, 2.3 Hz, 1H), 6.66 (d, *J* = 2.3 Hz, 1H), 5.69 (d, *J* = 12.4 Hz, 1H), 4.58 (d, *J* = 12.4 Hz, 1H), 4.00 – 3.94 (m, 2H), 3.82 (s, 3H), 0.96 (t, *J* = 7.2 Hz, 3H). <sup>13</sup>C NMR (150 MHz, DMSO) δ 186.4, 167.0, 166.2, 162.8, 136.5, 129.3, 128.5, 128.5, 127.9, 113.1, 110.7, 101.0, 81.0, 60.6, 58.1, 56.0, 13.8. HRMS (ESI) calcd for C<sub>19</sub>H<sub>18</sub>NaO<sub>5</sub><sup>+</sup> [*M* + Na<sup>+</sup>] 349.1046, found 349.1046.

**Ethyl 6-bromo-2-(2-bromophenyl)-4-oxochromane-3-carboxylate (1q)**

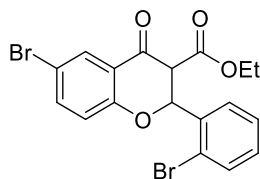

Following the general procedure, **1q** was purified by silica gel chromatography (5% EtOAc/PE). Yield: 678 mg, 75%, a white solid, mp. 108 – 110 °C. <sup>1</sup>H NMR (600 MHz, CDCl<sub>3</sub>) δ 12.31 (s, 1H), 7.82 (d, *J* = 2.4 Hz, 1H), 7.61 (dd, *J* = 7.8, 1.6 Hz, 1H), 7.32 (d, *J* = 8.8 Hz, 1H), 7.28 – 7.23 (m, 1H), 7.21 – 7.12 (m, 2H), 6.71 (s, 1H), 6.62 (dd, *J* = 8.8, 0.6 Hz, 1H), 4.21–4.09 (m, 2H), 1.15 (t, *J* = 7.2 Hz, 3H). <sup>13</sup>C NMR (150 MHz, CDCl<sub>3</sub>) δ 169.7, 161.6, 154.2, 137.9, 135.9, 133.4, 130.4, 128.9, 127.6, 126.9, 124.2, 119.1, 119.0, 113.6, 94.5, 74.2, 61.1, 14.0. HRMS (ESI) calcd for C<sub>18</sub>H<sub>14</sub><sup>79</sup>Br<sub>2</sub>NaO<sub>4</sub><sup>+</sup> [M + Na<sup>+</sup>] 474.9151, found 474.9151.

**Ethyl 4-oxo-2-(pyridin-2-yl)chromane-3-carboxylate (1r)**

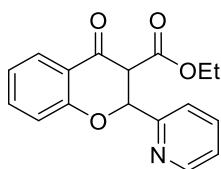

Following the general procedure, **1r** was purified by silica gel chromatography (5% EtOAc/PE). Yield: 480 mg, 75%, a white solid, mp. 86 – 88 °C. <sup>1</sup>H NMR (600 MHz, CDCl<sub>3</sub>) δ 8.60 (t, *J* = 5.8 Hz, 1H), 7.92 (d, *J* = 7.8 Hz, 1H), 7.73 (t, *J* = 7.6 Hz, 1H), 7.60 – 7.49 (m, 2H), 7.31 – 7.22 (m, 1H), 7.05 (dd, *J* = 7.8, 3.6 Hz, 2H), 5.91 (d, *J* = 10.4 Hz, 1H), 4.51 (d, *J* = 10.2 Hz, 1H), 4.24 – 4.14 (m, 2H), 1.18 (t, *J* = 7.2 Hz, 3H). <sup>13</sup>C NMR (151 MHz, CDCl<sub>3</sub>) δ 187.7, 167.5, 160.4, 149.4, 137.0, 136.6, 133.2, 127.4, 124.4, 123.9, 122.9, 122.0, 118.1, 80.8, 61.5, 56.6, 14.0. HRMS (ESI) calcd for C<sub>17</sub>H<sub>15</sub>NNaO<sub>4</sub><sup>+</sup> [M + Na<sup>+</sup>] 320.0893, found 320.0893.

**Ethyl 2-(furan-2-yl)-4-oxochromane-3-carboxylate (1s)**

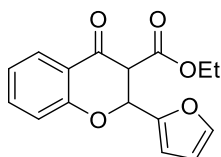

Following the general procedure, **1s** was purified by silica gel chromatography (5% EtOAc/PE). Yield: 432 mg, 70%, colorless oil. Major isomer: <sup>1</sup>H NMR (600 MHz, CDCl<sub>3</sub>) δ 12.31 (s, 1H), 7.70 (dd, *J* = 7.8, 1.6 Hz, 1H), 7.36 (d, *J* = 0.8 Hz, 1H), 7.29

(td,  $J = 8.2, 1.6$  Hz, 1H), 7.08 (t,  $J = 7.6$  Hz, 1H), 6.98 (t,  $J = 7.6$  Hz, 1H), 6.84 (d,  $J = 8.2$  Hz, 1H), 6.26 – 6.21 (m, 2H), 4.24 – 4.17 (m, 2H), 1.25 (t,  $J = 7.2$  Hz, 3H).  $^{13}\text{C}$  NMR (150 MHz,  $\text{CDCl}_3$ )  $\delta$  187.2, 166.7, 155.5, 149.3, 143.2, 133.3, 124.4, 121.5, 118.1, 117.1, 110.2, 109.4, 68.1, 60.9, 56.3, 14.2. Minor isomer: 7.98 – 7.91 (m, 1H), 7.57 – 7.50 (m, 1H), 7.48 (d,  $J = 1.0$  Hz, 1H), 7.03 (d,  $J = 8.4$  Hz, 1H), 6.51 (dd,  $J = 7.4, 3.3$  Hz, 1H), 6.39 (dd,  $J = 3.2, 1.8$  Hz, 1H), 6.20 (d,  $J = 3.3$  Hz, 1H), 5.79 (d,  $J = 11.1$  Hz, 1H), 4.27–4.24 (m, 2H), 1.19 (t,  $J = 7.1$  Hz, 3H).  $^{13}\text{C}$  NMR (150 MHz,  $\text{CDCl}_3$ )  $\delta$  187.2, 166.7, 155.5, 149.3, 143.2, 133.3, 124.4, 121.5, 118.1, 117.1, 110.2, 109.4, 68.1, 60.9, 56.4, 14.2. HRMS (ESI) calcd for  $\text{C}_{16}\text{H}_{14}\text{NaO}_5^+$  [ $\text{M} + \text{Na}^+$ ] 309.0733, found 309.0733.

#### Ethyl 4-oxo-2-(thiophen-2-yl)chromane-3-carboxylate (**1t**)

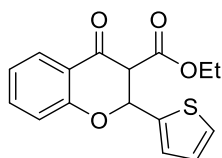

Following the general procedure, **1t** was purified by silica gel chromatography (5% EtOAc/PE). Yield: 507 mg, 78%, a white solid, mp. 70 – 72 °C.  $^1\text{H}$  NMR (600 MHz,  $\text{CDCl}_3$ )  $\delta$  12.29 (s, 1H), 7.69 (dd,  $J = 7.8, 1.5$  Hz, 1H), 7.35 – 7.27 (m, 1H), 7.17 (dd,  $J = 5.0, 1.2$  Hz, 1H), 7.01 – 6.90 (m, 2H), 6.90 – 6.83 (m, 2H), 6.45 (s, 1H), 4.27 (m, 2H), 1.26 (t,  $J = 7.2$  Hz, 3H).  $^{13}\text{C}$  NMR (150 MHz,  $\text{CDCl}_3$ )  $\delta$  155.4, 144.4, 133.4, 126.5, 125.9, 125.8, 124.5, 121.7, 117.8, 117.5, 100.0, 95.5, 70.5, 60.9, 14.2. HRMS (ESI) calcd for  $\text{C}_{16}\text{H}_{14}\text{NaO}_4\text{S}^+$  [ $\text{M} + \text{Na}^+$ ] 325.0505, found 325.0505.

#### Ethyl 2-benzyl-4-oxochromane-3-carboxylate (**1u**)

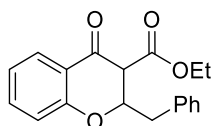

Following the general procedure, **1u** was purified by silica gel chromatography (5% EtOAc/PE). Yield: 526 mg, 79%, colorless oil.  $^1\text{H}$  NMR (600 MHz,  $\text{CDCl}_3$ )  $\delta$  12.2 (s,

1H), 7.68 (d,  $J = 7.7$  Hz, 1H), 7.36 - 7.32 (m, 1H), 7.28 (t,  $J = 7.6$  Hz, 2H), 7.21 (t,  $J = 7.2$  Hz, 1H), 7.14 (d,  $J = 7.6$  Hz, 2H), 6.99 (t,  $J = 7.4$  Hz, 1H), 6.87 (d,  $J = 8.2$  Hz, 1H), 5.36 – 5.34 (m, 1H), 4.16 (m, 2H), 3.02 (m, 1H), 2.81 (dd,  $J = 13.8, 3.8$  Hz, 1H), 1.26 (t,  $J = 7.2$  Hz, 3H).  $^{13}\text{C}$  NMR (150 MHz,  $\text{CDCl}_3$ )  $\delta$  170.1, 162.2, 155.5, 137.6, 133.3, 129.5, 128.3, 126.5, 124.5, 121.3, 117.9, 117.5, 95.7, 75.1, 60.8, 41.2, 14.2. HRMS (ESI) calcd for  $\text{C}_{19}\text{H}_{18}\text{NaO}_4^+$  [ $\text{M} + \text{Na}^+$ ] 333.1097, found 333.1098.

### Ethyl 4-oxo-2-propylchromane-3-carboxylate (**1v**)

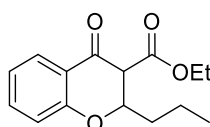

Following the general procedure, **1v** was purified by silica gel chromatography (5% EtOAc/PE). Yield: 445 mg, 78%, colorless oil.  $^1\text{H}$  NMR (600 MHz,  $\text{CDCl}_3$ )  $\delta$  12.11 (s, 1H), 7.89 (d,  $J = 7.8$  Hz, 1H), 7.64 (d,  $J = 7.8$  Hz, 1H), 7.49 (t,  $J = 7.4$  Hz, 1H), 7.35 – 7.28 (m, 1H), 7.09 – 7.00 (m, 1H), 6.99 – 6.93 (m, 2H), 6.86 (d,  $J = 8.2$  Hz, 1H), 5.20 (dd,  $J = 9.3, 3.3$  Hz, 1H), 4.80 – 4.67 (m, 1H), 4.35 – 4.22 (m, 4H), 3.63 (d,  $J = 11.2$  Hz, 1H), 1.88 – 1.76 (m, 2H), 1.70 – 1.60 (m, 2H), 1.55 – 1.41 (m, 4H), 1.37 – 1.28 (m, 6H), 0.98 (t,  $J = 7.2$  Hz, 3H), 0.91 (t,  $J = 7.2$  Hz, 3H).  $^{13}\text{C}$  NMR (150 MHz,  $\text{CDCl}_3$ )  $\delta$  188.2, 167.8, 161.0, 155.7, 136.4, 133.0, 127.6, 127.3, 124.4, 121.6, 121.0, 120.0, 117.9, 117.2, 96.3, 78.7, 73.7, 61.6, 60.6, 58.3, 37.1, 35.4, 18.6, 18.1, 14.3, 14.2, 13.8, 13.7. HRMS (ESI) calcd for  $\text{C}_{15}\text{H}_{18}\text{NaO}_4^+$  [ $\text{M} + \text{Na}^+$ ] 285.1097, found 285.1097.

### 3-Acetyl-2-phenylchroman-4-one (**1w**)

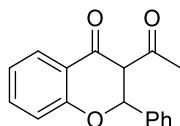

Following the general procedure, **1w** was purified by silica gel chromatography (5% EtOAc/PE). Yield: 376 mg, 65%, a yellow solid, mp. 102 – 104 °C.  $^1\text{H}$  NMR (600 MHz,  $\text{CDCl}_3$ )  $\delta$  16.41 (s, 1H), 7.91 – 7.78 (m, 1H), 7.45 (d,  $J = 7.4$  Hz, 2H), 7.40 – 7.27 (m,



4H), 6.98 (t,  $J = 7.6$  Hz, 1H), 6.87 (d,  $J = 8.4$  Hz, 1H), 6.29 (s, 1H), 2.08 (s, 3H).  $^{13}\text{C}$  NMR (150 MHz,  $\text{CDCl}_3$ )  $\delta$  190.3, 175.5, 157.1, 139.5, 135.0, 128.8, 128.7, 127.5, 125.9, 121.7, 119.6, 117.8, 104.3, 76.4, 22.8. HRMS (ESI) calcd for  $\text{C}_{17}\text{H}_{14}\text{NaO}_3^+$  [ $\text{M} + \text{Na}^+$ ] 289.0835, found 289.0835.

#### 4-Oxo-2-phenylchromane-3-carbonitrile (**1x**)

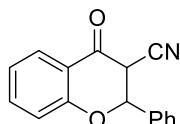

Following the general procedure, **1x** was purified by silica gel chromatography (5% EtOAc/PE). Yield: 353 mg, 65%, a yellow solid, mp. 114 – 116 °C.  $^1\text{H}$  NMR (600 MHz,  $\text{CDCl}_3$ )  $\delta$  7.95 (d,  $J = 7.9$  Hz, 1H), 7.64 – 7.53 (m, 3H), 7.51 – 7.42 (m, 3H), 7.14 (t,  $J = 7.6$  Hz, 1H), 7.06 (d,  $J = 8.4$  Hz, 1H), 5.46 (d,  $J = 12.0$  Hz, 1H), 4.16 (d,  $J = 12.0$  Hz, 1H).  $^{13}\text{C}$  NMR (150 MHz,  $\text{CDCl}_3$ )  $\delta$  182.7, 160.8, 137.6, 135.2, 130.2, 129.2, 128.0, 127.0, 122.9, 118.8, 118.4, 113.2, 80.9, 47.3. HRMS (ESI) calcd for  $\text{C}_{16}\text{H}_{11}\text{NNaO}_2^+$  [ $\text{M} + \text{Na}^+$ ] 272.0682, found 272.0672.

#### Flavanone (**1y**)

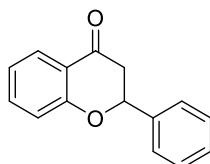

Following the general procedure, **1y** was purified by silica gel chromatography (5% EtOAc/PE). Yield: 304 mg, 68%, a white solid, mp. 76 – 78 °C.  $^1\text{H}$  NMR (600 MHz,  $\text{CDCl}_3$ )  $\delta$  7.92 (dd,  $J = 8.0, 1.4$  Hz, 1H), 7.52 – 7.44 (m, 3H), 7.41 (t,  $J = 7.4$  Hz, 2H), 7.35 (t,  $J = 4.8$  Hz, 1H), 7.02 (dd,  $J = 11.8, 4.4$  Hz, 2H), 5.44 (d,  $J = 13.2$  Hz, 1H), 3.04 (dd,  $J = 16.6, 13.4$  Hz, 1H), 2.90 – 2.81 (m, 1H).  $^{13}\text{C}$  NMR (150 MHz,  $\text{CDCl}_3$ )  $\delta$  191.8, 161.6, 138.9, 136.2, 128.9, 128.8, 127.1, 126.2, 121.7, 121.0, 118.2, 79.6, 44.7. HRMS (ESI) calcd for  $\text{C}_{15}\text{H}_{12}\text{NaO}_2^+$  [ $\text{M} + \text{Na}^+$ ] 247.0730, found 247.0732.

#### 4-Chromanone (**1z**)

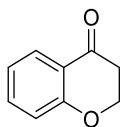

Following the general procedure, **1z** was purified by silica gel chromatography (5% EtOAc/PE). Yield: 230 mg, 78%, a white solid, mp. 37 – 39 °C. <sup>1</sup>H NMR (600 MHz, CDCl<sub>3</sub>) δ 7.85 (dd, *J* = 8.0, 1.8 Hz, 1H), 7.58 – 7.22 (m, 1H), 6.98 – 6.95 (m, 1H), 6.93 (d, *J* = 8.4 Hz, 1H), 4.71 – 4.34 (m, 1H), 3.08 – 2.59 (m, 1H). <sup>13</sup>C NMR (150 MHz, CDCl<sub>3</sub>) δ 191.5, 161.8, 135.8, 127.0, 121.2, 117.8, 66.9, 37.7. HRMS (ESI) calcd for C<sub>9</sub>H<sub>8</sub>NaO<sub>2</sub><sup>+</sup> [M + Na<sup>+</sup>] 171.0417, found 171.0417.

#### Methyl 4-oxochroman-3-carboxylate (**1aa**)[5]

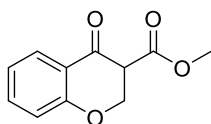

To a solution of 4-chromanone (5 mmol, 1.0 equiv) in THF (10 mL) stirred at –78 °C was added a solution of LiHMDS (1 M in THF, 7.5 mL, 7.5 mmol, 1.5 equiv) dropwise and the mixture was stirred for 30 minutes. Methyl cyanofomate (10 mmol, 2.0 equiv) in THF (10 mL) was added dropwise and the reaction was stirred at –78 °C for 1 hour. The mixture was allowed to warm to room temperature and was quenched by the addition of aq. NH<sub>4</sub>Cl (25 mL) and H<sub>2</sub>O (25 mL). The mixture was extracted with EtOAc (3 × 25 mL). The combined organic phases were washed with brine (30 mL), dried (MgSO<sub>4</sub>) and concentrated in vacuo. Flash column chromatography (ethyl acetate/ petroleum ether = 1:15) afforded the product as a colorless oil.

Following the procedure, **1aa** was purified by silica gel chromatography (10% EtOAc/PE). Yield: 350 mg, 85%, a colorless oil. Major: <sup>1</sup>H NMR (600 MHz, CDCl<sub>3</sub>) δ 7.95 – 7.85 (m, 1H), 7.53 – 7.43 (m, 1H), 7.07 – 6.92 (m, 2H), 4.97 – 4.90 (m, 1H), 4.82 – 4.74 (m, 1H), 4.62 – 4.58 (m, 1H), 3.79 – 3.72 (m, 3H). <sup>13</sup>C NMR (150 MHz, CDCl<sub>3</sub>) δ 186.8, 167.6, 161.4, 136.4, 127.6, 121.8, 117.9, 116.4, 68.1, 52.5, 51.6. Minor: <sup>1</sup>H NMR (600 MHz, CDCl<sub>3</sub>) δ 11.93 (s, 1H), 7.64 (d, *J* = 7.2 Hz, 1H), 7.34 – 7.29 (m, 1H), 6.98 (d, *J* = 10.8, 1H), 6.85 (d, *J* = 8.0 Hz, 1H), 4.97 – 4.90 (m, 2H), 3.83

– 3.78 (m, 3H).  $^{13}\text{C}$  NMR (150 MHz,  $\text{CDCl}_3$ )  $\delta$  170.0, 162.8, 157.7, 133.1, 124.5, 121.4, 120.5, 118.2, 91.7, 63.7, 52.7. HRMS (ESI) calcd for  $\text{C}_{11}\text{H}_{10}\text{NaO}_4^+$  [ $\text{M} + \text{Na}^+$ ] 229.0471, found 229.0473.

### 3.2 Spectral data of products

#### Ethyl 4-oxo-2-phenyl-4H-chromene-3-carboxylate (**2a**)

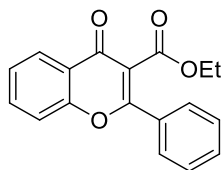

Following the general procedure, **2a** was purified by silica gel chromatography (15% EtOAc/PE). Yield: 282 mg, 89%, a white solid, mp. 81 – 82 °C.  $^1\text{H}$  NMR (600 MHz,  $\text{CDCl}_3$ )  $\delta$  8.27 (dd,  $J$  = 8.0, 1.6 Hz, 1H), 7.76 (d,  $J$  = 6.6 Hz, 2H), 7.73 (td,  $J$  = 8.4, 1.8 Hz, 1H). 7.56 (t,  $J$  = 7.2 Hz, 1H), 7.54-7.50 (m, 3H), 7.45 (t,  $J$  = 7.2 Hz, 1H), 4.28 (q,  $J$  = 7.2 Hz, 2H) 1.17 (t,  $J$  = 7.2 Hz, 3H).  $^{13}\text{C}$  NMR (150 MHz,  $\text{CDCl}_3$ )  $\delta$  175.1, 165.1, 163.1, 155.9, 134.3, 132.0, 131.6, 128.8, 128.1, 126.2, 125.7, 123.2, 118.4, 118.1, 61.9, 13.9. HRMS (ESI) calcd for  $\text{C}_{18}\text{H}_{14}\text{NaO}_4^+$  [ $\text{M} + \text{Na}^+$ ] 317.0784, found 317.0784.

#### Ethyl 6-fluoro-4-oxo-2-phenyl-4H-chromene-3-carboxylate (**2b**)

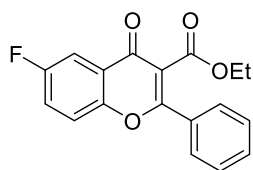

Following the general procedure, **2b** was purified by silica gel chromatography (3% EtOAc/PE). Yield: 244 mg, 73%, a white solid, mp. 100 – 102 °C.  $^1\text{H}$  NMR (600 MHz,  $\text{CDCl}_3$ )  $\delta$  7.90 (dd,  $J$  = 8.0, 3.2 Hz, 1H), 7.74 (dd,  $J$  = 5.4, 3.4 Hz, 2H), 7.60 – 7.54 (m, 2H), 7.52 (t,  $J$  = 7.6 Hz, 2H), 7.45 (m, 3.1 Hz, 1H), 4.27 (q,  $J$  = 7.2 Hz, 2H), 1.17 (t,  $J$  = 7.2 Hz, 3H).  $^{13}\text{C}$  NMR (150 MHz,  $\text{CDCl}_3$ )  $\delta$  174.3, 164.1 ( $^1J_{\text{C-F}}$  = 211.83), 160.6, 159.0, 152.1, 131.8, 131.8, 128.8, 128.1, 124.5 ( $^3J_{\text{C-F}}$  = 7.635), 122.7 ( $^2J_{\text{C-F}}$  = 25.335),

---

120.3( $^3J_{\text{C-F}} = 7.995$ ), 117.7, 111.1( $^2J_{\text{C-F}} = 23.73$ ), 62.0, 13.8. HRMS (ESI) calcd for  $\text{C}_{18}\text{H}_{13}\text{FNaO}_4^+$  [ $\text{M} + \text{Na}^+$ ] 335.0690, found 335.0690.

**Ethyl 6-bromo-4-oxo-2-phenyl-4H-chromene-3-carboxylate (2c)**

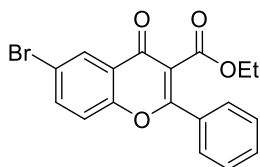

Following the general procedure, **2c** was purified by silica gel chromatography (20% EtOAc/PE). Yield: 328 mg, 83%, a white solid, mp. 114 – 116 °C.  $^1\text{H}$  NMR (600 MHz,  $\text{CDCl}_3$ )  $\delta$  8.38 (s, 1H), 7.80 (d,  $J = 8.8$  Hz, 1H), 7.74 (d,  $J = 7.5$  Hz, 2H), 7.57 (t,  $J = 7.4$  Hz, 1H), 7.51 (t,  $J = 7.4$  Hz, 2H), 7.43 (d,  $J = 8.8$  Hz, 1H), 4.27 (q,  $J = 7.0$  Hz, 2H), 1.16 (t,  $J = 7.2$  Hz, 3H).  $^{13}\text{C}$  NMR (150 MHz,  $\text{CDCl}_3$ )  $\delta$  173.7, 164.7, 163.4, 154.6, 137.3, 131.9, 131.7, 128.8, 128.7, 128.1, 124.5, 120.1, 119.2, 118.4, 62.1, 13.8. HRMS (ESI) calcd for  $\text{C}_{18}\text{H}_{13}^{79}\text{BrNaO}_4^+$  [ $\text{M} + \text{Na}^+$ ] 394.9889, found 394.9889.

**Ethyl 6-chloro-4-oxo-2-phenyl-4H-chromene-3-carboxylate (2d)**

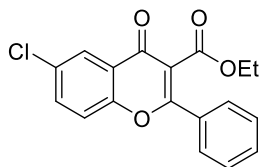

Following the general procedure, **2d** was purified by silica gel chromatography (40% DCM/PE). Yield: 263 mg, 75%, a white solid, mp. 106 – 108 °C.  $^1\text{H}$  NMR (600 MHz,  $\text{CDCl}_3$ )  $\delta$  8.38 (s, 1H), 7.80 (d,  $J = 8.8$  Hz, 1H), 7.74 (d,  $J = 7.6$  Hz, 2H), 7.57 (t,  $J = 7.4$  Hz, 1H), 7.51 (t,  $J = 7.4$  Hz, 2H), 7.43 (d,  $J = 8.8$  Hz, 1H), 4.27 (q,  $J = 7.2$  Hz, 2H), 1.16 (t,  $J = 7.2$  Hz, 3H).  $^{13}\text{C}$  NMR (150 MHz,  $\text{CDCl}_3$ )  $\delta$  173.7, 164.7, 163.4, 154.6, 137.3, 131.9, 131.7, 128.8, 128.7, 128.1, 124.5, 120.1, 119.2, 118.4, 62.1, 13.8. HRMS (ESI) calcd for  $\text{C}_{18}\text{H}_{13}^{35}\text{ClNaO}_4^+$  [ $\text{M} + \text{Na}^+$ ] 351.0395, found 351.0395.

---

**Ethyl 6-cyano-4-oxo-2-phenyl-4H-chromene-3-carboxylate (2e)**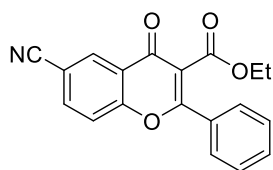

Following the general procedure, **2e** was purified by silica gel chromatography (20% EtOAc/PE). Yield: 250 mg, 73%, a white solid, mp. 148 – 150 °C. <sup>1</sup>H NMR (600 MHz, CDCl<sub>3</sub>) δ 8.59 (s, 1H), 7.95 (dd, *J* = 8.8, 1.8 Hz, 1H), 7.75 (d, *J* = 7.7 Hz, 2H), 7.66 (d, *J* = 8.8 Hz, 1H), 7.60 (t, *J* = 7.4 Hz, 1H), 7.53 (t, *J* = 7.8 Hz, 2H), 4.28 (q, *J* = 7.2 Hz, 2H), 1.17 (t, *J* = 7.2 Hz, 3H). <sup>13</sup>C NMR (150 MHz, CDCl<sub>3</sub>) δ 173.2, 164.1, 163.7, 157.5, 136.6, 132.2, 131.7, 131.1, 129.0, 128.1, 123.7, 119.9, 119.0, 117.3, 110.0, 62.3, 13.9. HRMS (ESI) calcd for C<sub>19</sub>H<sub>13</sub>NNaO<sub>4</sub><sup>+</sup> [*M* + Na<sup>+</sup>] 342.0737, found 342.0738.

**Ethyl 7-nitro-4-oxo-2-phenyl-4H-chromene-3-carboxylate (2f)**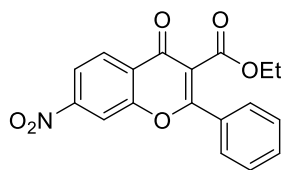

Following the general procedure, **2f** was purified by silica gel chromatography (5% DCM/PE). Yield: 246 mg, 68%, a white solid, mp. 186 – 188 °C. <sup>1</sup>H NMR (600 MHz, CDCl<sub>3</sub>) δ 9.13 (d, *J* = 3.0 Hz, 1H), 8.56 (dd, *J* = 9.2, 2.8 Hz, 1H), 7.77 (d, *J* = 7.2 Hz, 2H), 7.71 (d, *J* = 9.2 Hz, 1H), 7.62 (t, *J* = 7.4 Hz, 1H), 7.55 (t, *J* = 7.6 Hz, 2H), 4.30 (q, *J* = 7.2 Hz, 2H), 1.18 (t, *J* = 7.2 Hz, 3H). <sup>13</sup>C NMR (151 MHz, CDCl<sub>3</sub>) δ 173.6, 164.1, 163.7, 158.6, 145.1, 132.3, 131.0, 129.0, 128.7, 128.2, 123.4, 122.8, 120.0, 118.7, 62.3, 13.8. HRMS (ESI) calcd for C<sub>18</sub>H<sub>13</sub>NNaO<sub>6</sub><sup>+</sup> [*M* + Na<sup>+</sup>] 362.0635, found 362.0635.

**Ethyl 8-chloro-4-oxo-2-phenyl-4H-chromene-3-carboxylate (2g)**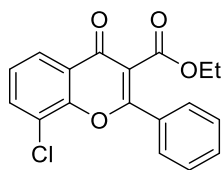

Following the general procedure, **2g** was purified by silica gel chromatography (20% EtOAc/PE). Yield: 197 mg, 56%, a white solid, mp. 108 – 110 °C. <sup>1</sup>H NMR (600 MHz, CDCl<sub>3</sub>) δ 8.22 – 8.12 (m, 1H), 7.84 (dd, *J* = 7.2, 1.8 Hz, 2H), 7.81 – 7.72 (m, 1H), 7.62 – 7.56 (m, 1H), 7.55 – 7.50 (m, 2H), 7.39 (m, 1H), 4.31 (q, *J* = 7.2, 2H), 1.20 (td, *J* = 7.2, 1.8 Hz, 3H). <sup>13</sup>C NMR (150 MHz, CDCl<sub>3</sub>) δ 174.6, 164.8, 162.7, 151.6, 134.5, 132.0, 131.4, 128.9, 128.3, 125.7, 124.7, 124.6, 123.3, 118.2, 62.1, 13.9. HRMS (ESI) calcd for C<sub>18</sub>H<sub>13</sub><sup>35</sup>ClNaO<sub>4</sub><sup>+</sup> [*M* + Na<sup>+</sup>] 351.0395, found 351.0397.

**Ethyl 6-methyl-4-oxo-2-phenyl-4*H*-chromene-3-carboxylate (2h)**

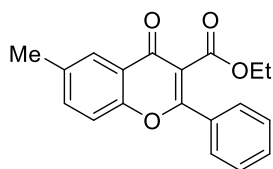

Following the general procedure, **2h** was purified by silica gel chromatography (15% EtOAc/PE). Yield: 268 mg, 81%, a white solid, mp. 114 – 116 °C. <sup>1</sup>H NMR (600 MHz, CDCl<sub>3</sub>) δ 8.03 (s, 1H), 7.74 (d, *J* = 7.8 Hz, 2H), 7.58 – 7.46 (m, 4H), 7.42 (dd, *J* = 8.6, 2.9 Hz, 1H), 4.27 (q, *J* = 7.2 Hz, 2H), 2.46 (s, 3H), 1.16 (t, *J* = 7.2 Hz, 3H). <sup>13</sup>C NMR (150 MHz, CDCl<sub>3</sub>) δ 175.1, 165.2, 162.9, 154.2, 135.8, 135.5, 132.2, 131.5, 128.7, 128.1, 125.4, 122.9, 118.2, 117.8, 61.8, 21.0, 13.8. HRMS (ESI) calcd for C<sub>19</sub>H<sub>16</sub>NaO<sub>4</sub><sup>+</sup> [*M* + Na<sup>+</sup>] 331.0941, found 331.0941.

**Ethyl 7-methoxy-4-oxo-2-phenyl-4*H*-chromene-3-carboxylate (2i)**

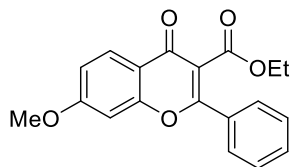

Following the general procedure, **2i** was purified by silica gel chromatography (15% EtOAc/PE). Yield: 298 mg, 92%, a white solid, mp. 100 – 102 °C. <sup>1</sup>H NMR (600 MHz, CDCl<sub>3</sub>) δ 8.16 (d, *J* = 8.9 Hz, 1H), 7.75 – 7.72 (m, 2H), 7.59 – 7.53 (m, 1H), 7.50 (t, *J* = 7.5 Hz, 2H), 7.01 (dd, *J* = 8.9, 2.3 Hz, 1H), 6.91 (d, *J* = 2.3 Hz, 1H), 4.27 (q, *J* = 7.1 Hz, 2H), 3.92 (s, 3H), 1.17

(t,  $J = 7.1$  Hz, 3H).  $^{13}\text{C}$  NMR (150 MHz,  $\text{CDCl}_3$ )  $\delta$  174.4, 165.2, 164.6, 162.6, 157.6, 132.1, 131.5, 128.7, 128.1, 127.6, 118.3, 117.0, 115.0, 100.3, 61.9, 55.9, 13.9. HRMS (ESI) calcd for  $\text{C}_{19}\text{H}_{16}\text{NaO}_5^+$  [ $\text{M} + \text{Na}^+$ ] 347.0890, found 347.0891.

**Ethyl 1-oxo-3-phenyl-1H-benzo[f]chromene-2-carboxylate (2j)**

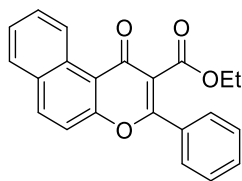

Following the general procedure, **2j** was purified by silica gel chromatography (15% EtOAc/PE). Yield: 213 mg, 62%, a white solid, mp. 136 – 138 °C.  $^1\text{H}$  NMR (600 MHz,  $\text{CDCl}_3$ )  $\delta$  10.04 – 10.02 (m, 1H), 8.15 – 8.11 (m, 1H), 7.92 (t,  $J = 6.6$  Hz, 1H), 7.83 – 7.80 (m, 2H), 7.78–7.74 (m, 1H), 7.68 – 7.61 (m, 1H), 7.56–7.51 (m, 4H), 4.35 (q,  $J = 7.2$  Hz, 2H), 1.24 (t,  $J = 7.2$  Hz, 3H).  $^{13}\text{C}$  NMR (150 MHz,  $\text{CDCl}_3$ )  $\delta$  176.8, 165.4, 160.1, 157.1, 136.2, 131.5, 131.5, 130.7, 130.3, 129.5, 128.8, 128.3, 128.0, 127.2, 126.9, 120.9, 117.3, 116.5, 62.0, 14.0. HRMS (ESI) calcd for  $\text{C}_{22}\text{H}_{16}\text{NaO}_4^+$  [ $\text{M} + \text{Na}^+$ ] 367.0941, found 367.0951.

**Ethyl 2-(2-chlorophenyl)-4-oxo-4H-chromene-3-carboxylate (2k)**

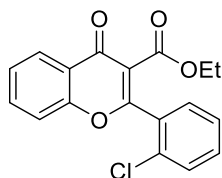

Following the general procedure, **2k** was purified by silica gel chromatography (30% DCM/PE). Yield: 284 mg, 81%, a white solid, mp. 132 – 134 °C.  $^1\text{H}$  NMR (400 MHz,  $\text{CDCl}_3$ )  $\delta$  8.30 (dd,  $J = 8.0, 1.4$  Hz, 1H), 7.77 – 7.68 (m, 1H), 7.57 – 7.44 (m, 5H), 7.38 (td,  $J = 7.4, 1.2$  Hz, 1H), 4.13 (q,  $J = 7.2$  Hz, 2H), 1.01 (t,  $J = 7.2$  Hz, 3H).  $^{13}\text{C}$  NMR (100 MHz,  $\text{CDCl}_3$ )  $\delta$  174.5, 163.6, 163.1, 155.9, 134.4, 133.3, 132.0, 131.6, 130.5, 130.0, 126.7, 126.3, 125.9, 123.7, 120.0, 118.2, 61.5, 13.7. HRMS (ESI) calcd for  $\text{C}_{18}\text{H}_{13}^{35}\text{ClNaO}_4^+$  [ $\text{M} + \text{Na}^+$ ] 351.0395, found 351.0395.

---

**Ethyl 2-(2-bromophenyl)-4-oxo-4H-chromene-3-carboxylate (2l)**

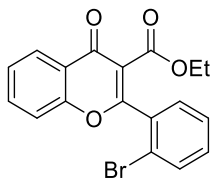

Following the general procedure, **2l** was purified by silica gel chromatography (15% EtOAc/PE). Yield: 327 mg, 83%, a white solid, mp. 134 – 136 °C. <sup>1</sup>H NMR (600 MHz, CDCl<sub>3</sub>) δ 8.29 (d, *J* = 7.9 Hz, 1H), 7.79 – 7.65 (m, 2H), 7.51 – 7.37 (m, 5H), 4.11 (q, *J* = 7.1 Hz, 2H), 0.99 (t, *J* = 7.1 Hz, 3H). <sup>13</sup>C NMR (150 MHz, CDCl<sub>3</sub>) δ 174.5, 164.0, 163.5, 155.9, 134.5, 133.6, 133.2, 132.1, 130.6, 127.3, 126.2, 125.9, 123.6, 122.3, 119.7, 118.2, 61.4, 13.7. HRMS (ESI) calcd for C<sub>18</sub>H<sub>13</sub><sup>79</sup>BrNaO<sub>4</sub><sup>+</sup> [*M* + Na<sup>+</sup>] 394.9889, found 394.9889.

**Ethyl 2-(4-fluorophenyl)-4-oxo-4H-chromene-3-carboxylate (2m)**

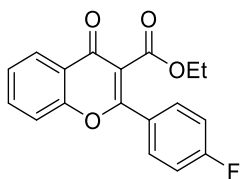

Following the general procedure, **2m** was purified by silica gel chromatography (15% EtOAc/PE). Yield: 283 mg, 91%, colorless oil. <sup>1</sup>H NMR (600 MHz, CDCl<sub>3</sub>) δ 8.10 – 8.07 (m, 1H), 7.68 – 7.62 (m, 2H), 7.61 – 7.53 (m, 1H), 7.42 – 7.34 (m, 1H), 7.32 – 7.25 (m, 1H), 7.16 – 6.99 (m, 2H), 4.19 – 4.15 (m, 2H), 1.37 – 0.83 (m, 3H). <sup>13</sup>C NMR (150 MHz, CDCl<sub>3</sub>) δ 174.8, 164.9, 164.5 (<sup>1</sup>*J*<sub>C-F</sub> = 251.955), 161.7, 155.7, 134.4, 130.4 (<sup>3</sup>*J*<sub>C-F</sub> = 8.82), 128.1, 125.9, 125.7, 123.0, 118.3, 118.0, 116.0 (<sup>2</sup>*J*<sub>C-F</sub> = 21.96), 61.9, 13.9. HRMS (ESI) calcd for C<sub>18</sub>H<sub>13</sub>FN<sup>+</sup>O<sub>4</sub><sup>+</sup> [*M* + Na<sup>+</sup>] 335.0690, found 335.0690.

**Ethyl 4-oxo-2-(*p*-tolyl)-4H-chromene-3-carboxylate (2n)**

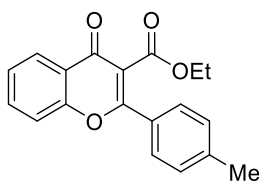



Following the general procedure, **2n** was purified by silica gel chromatography (15% EtOAc/PE). Yield: 225 mg, 68%, colorless oil.  $^1\text{H}$  NMR (600 MHz,  $\text{CDCl}_3$ )  $\delta$  8.32 – 8.16 (m, 1H), 7.70 – 7.58 (m, 3H), 7.49 – 7.46 (m, 1H), 7.43 – 7.35 (m, 1H), 7.29 – 7.27 (d, 2H), 4.29 (q,  $J = 6.6$  Hz, 2H), 2.41 (s, 3H), 1.44 – 0.92 (m, 3H).  $^{13}\text{C}$  NMR (151 MHz,  $\text{CDCl}_3$ )  $\delta$  175.0, 165.3, 163.0, 155.8, 142.3, 134.2, 129.5, 129.1, 128.0, 126.0, 125.6, 123.1, 118.1, 117.9, 61.8, 21.6, 13.9. HRMS (ESI) calcd for  $\text{C}_{19}\text{H}_{16}\text{NaO}_4^+$  [ $\text{M} + \text{Na}^+$ ] 331.0941, found 331.0941.

**Ethyl 2-(naphthalen-2-yl)-4-oxo-4H-chromene-3-carboxylate (2o)**

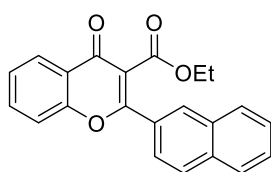

Following the general procedure, **2o** was purified by silica gel chromatography (15% EtOAc/PE). Yield: 275 mg, 75%, a white solid, mp. 112 – 114 °C.  $^1\text{H}$  NMR (400 MHz,  $\text{CDCl}_3$ )  $\delta$  8.35 (dd,  $J = 7.8, 1.6$  Hz, 1H), 8.02 (d,  $J = 8.3$  Hz, 1H), 7.93 (dd,  $J = 6.4, 3.2$  Hz, 1H), 7.89 – 7.83 (m, 1H), 7.76 – 7.66 (m, 2H), 7.58 – 7.45 (m, 5H), 3.95 (q,  $J = 7.2$  Hz, 2H), 0.73 (t,  $J = 7.2$  Hz, 3H).  $^{13}\text{C}$  NMR (100 MHz,  $\text{CDCl}_3$ )  $\delta$  174.7, 164.8, 164.0, 156.1, 134.4, 133.4, 131.5, 130.6, 129.7, 128.5, 127.8, 127.5, 126.7, 126.3, 125.9, 124.9, 124.8, 123.7, 120.8, 118.3, 61.3, 13.5. HRMS (ESI) calcd for  $\text{C}_{22}\text{H}_{16}\text{NaO}_4^+$  [ $\text{M} + \text{Na}^+$ ] 367.0941, found 367.0941.

**Ethyl 2-(2-methoxyphenyl)-4-oxo-4H-chromene-3-carboxylate (2p)**

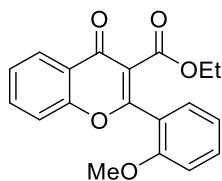

Following the general procedure, **2p** was purified by silica gel chromatography (15% EtOAc/PE). Yield: 260 mg, 75%, a white solid, mp. 120 – 122 °C.  $^1\text{H}$  NMR (600 MHz,  $\text{CDCl}_3$ )  $\delta$  8.28 (dd,  $J = 7.8$  Hz, 1.6 Hz, 1H), 7.69 (t,  $J = 9.0$  Hz, 1H), 7.52–7.49 (m, 2H), 7.47 (d,  $J = 8.4$  Hz, 1H), 7.43 (t,  $J = 7.8$  Hz, 1H), 7.07 (t,  $J = 7.8$  Hz, 1H), 6.99 (d,  $J =$

7.8 Hz, 1H), 4.15 (q,  $J = 7.2$  Hz, 2H), 3.83 (s, 3H), 1.06 (t,  $J = 7.2$  Hz, 3H).  $^{13}\text{C}$  NMR (150 MHz,  $\text{CDCl}_3$ ):  $\delta$  174.7, 164.3, 163.4, 157.0, 156.0, 134.0, 132.6, 130.1, 126.2, 125.5, 123.6, 121.7, 120.5, 119.4, 118.1, 111.1, 61.2, 55.6, 13.8. HRMS (ESI) calcd for  $\text{C}_{19}\text{H}_{16}\text{NaO}_5^+$  [ $\text{M} + \text{Na}^+$ ] 347.0890, found 347.0891.

**Ethyl 6-bromo-2-(2-bromophenyl)-4-oxo-4H-chromene-3-carboxylate (2q)**

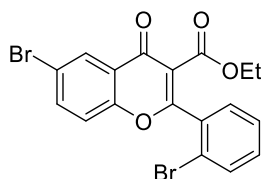

Following the general procedure, **2q** was purified by silica gel chromatography (15% EtOAc/PE). Yield: 360 mg, 80%, a light yellow solid, decomposition  $> 300$  °C.  $^1\text{H}$  NMR (600 MHz,  $\text{CDCl}_3$ )  $\delta$  8.41 (d,  $J = 2.4$  Hz, 1H), 7.81 (dd,  $J = 8.8, 2.4$  Hz, 1H), 7.72 (dd,  $J = 7.6, 1.4$  Hz, 1H), 7.49 (dd,  $J = 7.4, 1.8$  Hz, 1H), 7.47 – 7.37 (m, 3H), 4.11 (q,  $J = 7.2$  Hz, 2H), 0.99 (t,  $J = 7.2$  Hz, 3H).  $^{13}\text{C}$  NMR (150 MHz,  $\text{CDCl}_3$ )  $\delta$  173.3, 164.2, 163.1, 154.6, 137.4, 133.3, 133.2, 132.2, 130.6, 128.8, 127.3, 125.0, 122.3, 120.2, 119.8, 119.5, 61.6, 13.7. HRMS (ESI) calcd for  $\text{C}_{18}\text{H}_{12}^{79}\text{Br}_2\text{NaO}_4^+$  [ $\text{M} + \text{Na}^+$ ] 472.8995, found 472.8996.

**Ethyl 4-oxo-2-(pyridin-2-yl)-4H-chromene-3-carboxylate (2r)**

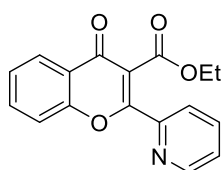

Following the general procedure, **2r** was purified by silica gel chromatography (15% EtOAc/PE). Yield: 251 mg, 79%, a white solid, mp. 142 – 144 °C.  $^1\text{H}$  NMR (600 MHz,  $\text{CDCl}_3$ )  $\delta$  8.65 (s, 1H), 8.23 (t,  $J = 7.0$  Hz, 1H), 8.11 - 8.09 (m, 1H), 7.94 – 7.81 (m, 1H), 7.81 – 7.67 (m, 1H), 7.66 – 7.53 (m, 1H), 7.51 - 7.40 (m, 2H), 4.47 (qd,  $J = 7.6, 2.8$  Hz, 2H), 1.37 (td,  $J = 7.2, 2.2$  Hz, 3H).  $^{13}\text{C}$  NMR (150 MHz,  $\text{CDCl}_3$ )  $\delta$  175.6, 165.1, 158.1, 155.3, 149.1, 148.8, 137.1, 134.5, 126.1, 125.8, 125.7, 123.5, 122.2, 118.2,

118.0, 61.6, 14.1. HRMS (ESI) calcd for  $C_{17}H_{13}NNa_4^+$  [ $M + Na^+$ ] 318.0737, found 318.0737.

**Ethyl 2-(furan-2-yl)-4-oxo-4H-chromene-3-carboxylate (2s)**

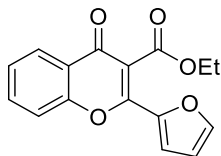

Following the general procedure, **2s** was purified by silica gel chromatography (15% EtOAc/PE). Yield: 240 mg, 78%, a white solid, mp. 88 – 90 °C.  $^1H$  NMR (600 MHz,  $CDCl_3$ )  $\delta$  8.22 (dd,  $J = 7.8, 1.6$  Hz, 1H), 7.72 – 7.67 (m, 1H), 7.63 (d,  $J = 1.0$  Hz, 1H), 7.50 (d,  $J = 8.4$  Hz, 1H), 7.45 – 7.38 (m, 1H), 7.23 (d,  $J = 3.4$  Hz, 1H), 6.64 (dd,  $J = 3.4, 1.8$  Hz, 1H), 4.48 (q,  $J = 7.2$  Hz, 2H), 1.40 (t,  $J = 7.2$  Hz, 3H).  $^{13}C$  NMR (150 MHz,  $CDCl_3$ )  $\delta$  174.9, 164.5, 155.3, 151.6, 146.5, 145.3, 134.3, 126.0, 125.6, 123.3, 117.8, 115.6, 114.8, 112.6, 62.0, 14.2. HRMS (ESI) calcd for  $C_{16}H_{12}NaO_5^+$  [ $M + Na^+$ ] 307.0577, found 307.0577.

**Ethyl 4-oxo-2-(thiophen-2-yl)-4H-chromene-3-carboxylate (2t)**

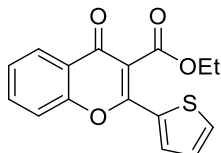

Following the general procedure, **2t** was purified by silica gel chromatography (15% EtOAc/PE). Yield: 252 mg, 78%, a white solid, mp. 88 – 90 °C.  $^1H$  NMR (600 MHz,  $CDCl_3$ )  $\delta$  8.21 (d,  $J = 7.8$  Hz, 1H), 7.75 – 7.61 (m, 3H), 7.52 (d,  $J = 7.8$  Hz, 1H), 7.42 (t,  $J = 8.8$  Hz, 1H), 7.18 (t,  $J = 4.8$  Hz, 1H), 4.45 (q,  $J = 7.2$  Hz, 2H), 1.37 (t,  $J = 7.2$  Hz, 3H).  $^{13}C$  NMR (150 MHz,  $CDCl_3$ )  $\delta$  174.9, 165.2, 156.0, 155.5, 134.3, 133.2, 131.6, 130.9, 128.3, 125.9, 125.6, 123.0, 117.9, 116.1, 62.3, 14.0. HRMS (ESI) calcd for  $C_{16}H_{12}NaO_4S^+$  [ $M + Na^+$ ] 323.0349, found 323.0348.

### Ethyl 2-benzyl-4-oxo-4H-chromene-3-carboxylate (**2u**)

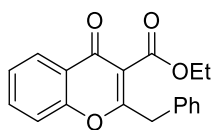

Following the general procedure, **2u** was purified by silica gel chromatography (15% EtOAc/PE). Yield: 222 mg, 67%, colorless oil.  $^1\text{H}$  NMR (600 MHz,  $\text{CDCl}_3$ )  $\delta$  8.17 (d,  $J = 8.2$  Hz, 1H), 7.61 (t,  $J = 7.8$  Hz, 1H), 7.42 – 7.31 (m, 6H), 7.29 – 7.21 (m, 1H), 4.42 (d,  $J = 7.2$  Hz, 2H), 4.08 (s, 2H), 1.38 (t,  $J = 7.2$  Hz, 3H).  $^{13}\text{C}$  NMR (151 MHz,  $\text{CDCl}_3$ )  $\delta$  174.7, 166.9, 165.1, 155.7, 134.9, 134.0, 129.1, 128.8, 127.4, 126.0, 125.6, 123.3, 118.6, 117.9, 62.0, 39.0, 14.2. HRMS (ESI) calcd for  $\text{C}_{19}\text{H}_{16}\text{NaO}_4^+$  [ $\text{M} + \text{Na}^+$ ] 331.0941, found 331.0941.

### Ethyl 4-oxo-2-propyl-4H-chromene-3-carboxylate (**2v**)

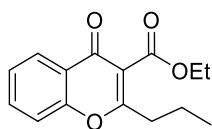

Following the general procedure, **2v** was purified by silica gel chromatography (15% EtOAc/PE). Yield: 212 mg, 75%, colorless oil.  $^1\text{H}$  NMR (600 MHz,  $\text{CDCl}_3$ )  $\delta$  8.20 (d,  $J = 8.0$  Hz, 1H), 7.74 – 7.62 (m, 1H), 7.43 (d,  $J = 8.4$  Hz, 1H), 7.40 (t,  $J = 7.5$  Hz, 1H), 4.42 (d,  $J = 7.2$  Hz, 2H), 2.73 (t,  $J = 7.6$  Hz, 2H), 1.84 (dd,  $J = 15.0, 7.6$  Hz, 2H), 1.40 (t,  $J = 7.2$  Hz, 3H), 1.04 (t,  $J = 7.4$  Hz, 3H).  $^{13}\text{C}$  NMR (151 MHz,  $\text{CDCl}_3$ )  $\delta$  174.6, 169.2, 165.1, 155.7, 133.9, 126.1, 125.4, 123.4, 118.3, 117.8, 61.7, 34.9, 20.8, 14.2, 13.7. HRMS (ESI) calcd for  $\text{C}_{15}\text{H}_{16}\text{NaO}_4^+$  [ $\text{M} + \text{Na}^+$ ] 283.0941, found 283.0941.

### 3-Acetyl-2-phenyl-4H-chromen-4-one (**2w**)

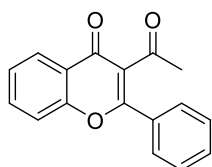

Following the general procedure, **2w** was purified by silica gel chromatography (15% EtOAc/PE). Yield: 193 mg, 73%, colorless oil.  $^1\text{H}$  NMR (600 MHz,  $\text{CDCl}_3$ )  $\delta$  8.25 (dd,  $J = 8.0, 1.4$  Hz, 1H), 7.76 – 7.70 (m, 1H), 7.69 – 7.64 (m, 2H), 7.57 – 7.49 (m, 4H), 7.46

(t,  $J = 7.6$  Hz, 1H), 2.46 (s, 3H).  $^{13}\text{C}$  NMR (150 MHz,  $\text{CDCl}_3$ )  $\delta$  200.5, 175.9, 162.5, 155.9, 134.4, 131.9, 131.6, 128.9, 128.6, 126.0, 125.7, 124.9, 123.5, 118.1, 32.4. HRMS (ESI) calcd for  $\text{C}_{17}\text{H}_{12}\text{NaO}_3^+$  [ $\text{M} + \text{Na}^+$ ] 287.0679, found 287.0679.

#### 4-Oxo-2-phenyl-4H-chromene-3-carbonitrile (2x)

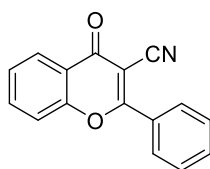

Following the general procedure, **2x** was purified by silica gel chromatography (15% EtOAc/PE). Yield: 112 mg, 45%, a white solid, mp. 150 – 152 °C.  $^1\text{H}$  NMR (600 MHz,  $\text{CDCl}_3$ )  $\delta$  8.28 (d,  $J = 7.8$  Hz, 1H), 8.12 (d,  $J = 7.8$  Hz, 2H), 7.81 (t,  $J = 7.8$  Hz, 1H), 7.68 (t,  $J = 7.4$  Hz, 1H), 7.61 (t,  $J = 8.8$  Hz, 3H), 7.53 (t,  $J = 7.6$  Hz, 1H).  $^{13}\text{C}$  NMR (150 MHz,  $\text{CDCl}_3$ )  $\delta$  174.2, 170.8, 155.4, 135.3, 133.4, 130.1, 129.2, 128.8, 126.9, 126.2, 122.0, 118.3, 114.0, 98.3. HRMS (ESI) calcd for  $\text{C}_{16}\text{H}_9\text{NNaO}_2^+$  [ $\text{M} + \text{Na}^+$ ] 270.0525, found 270.0526.

#### 2-Phenyl-4H-chromen-4-one (2y)

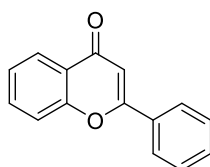

Following the general procedure, **2y** was purified by silica gel chromatography (25% EtOAc/PE). Yield: 47 mg, 21%, a white solid, mp. 98 – 100 °C.  $^1\text{H}$  NMR (600 MHz,  $\text{CDCl}_3$ )  $\delta$  8.25 (dd,  $J = 8.0, 1.6$  Hz, 1H), 7.94 (dd,  $J = 7.8, 1.8$  Hz, 2H), 7.71 (dd,  $J = 8.6, 7.2$  Hz, 1H), 7.58 (d,  $J = 8.4$  Hz, 1H), 7.56 – 7.50 (m, 3H), 7.43 (t,  $J = 7.2$  Hz, 1H), 6.85 (s, 1H).  $^{13}\text{C}$  NMR (150 MHz,  $\text{CDCl}_3$ )  $\delta$  178.4, 163.5, 156.3, 133.8, 131.9, 131.6, 129.1, 126.3, 125.8, 125.2, 124.0, 118.1, 107.7. HRMS (ESI) calcd for  $\text{C}_{15}\text{H}_{10}\text{NaO}_2^+$  [ $\text{M} + \text{Na}^+$ ] 245.0573, found 245.0576.

---

**Methyl 4-oxo-4*H*-chromene-3-carboxylate (2aa)**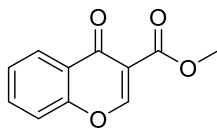

Following the general procedure, **2aa** was purified by silica gel chromatography (15% EtOAc/PE). Yield: 71 mg, 35%, a white solid, mp. 63 –65 °C. <sup>1</sup>H NMR (600 MHz, CDCl<sub>3</sub>) δ 7.99 (dd, *J* = 8.0, 1.6 Hz, 1H), 7.62 (t, *J* = 7.2 Hz, 1H), 7.22 (t, *J* = 7.8 Hz, 1H), 7.10 (d, *J* = 8.4 Hz, 1H), 5.73 (s, 1H), 3.93 (s, 3H). <sup>13</sup>C NMR (151 MHz, CDCl<sub>3</sub>) δ 183.2, 163.5, 154.9, 136.8, 127.6, 123.9, 119.0, 118.1, 79.2, 58.6, 53.3. HRMS (ESI) calcd for C<sub>11</sub>H<sub>8</sub>NaO<sub>4</sub><sup>+</sup> [*M* + Na<sup>+</sup>] 227.0315, found 227.0314.

**2-(2-Bromophenyl)-4-oxo-4*H*-chromene-3-carboxylic acid (G)**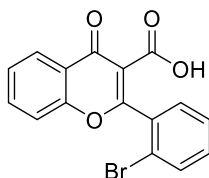

Following the general procedure, the acid **G** was obtained. Yield: 585 mg, 85%, a light yellow solid, mp. 182 – 184 °C. <sup>1</sup>H NMR (600 MHz, CDCl<sub>3</sub>) δ 8.21 (d, *J* = 2.4 Hz, 1H), 7.77 (dd, *J* = 8.8, 2.4 Hz, 1H), 7.68 (d, *J* = 7.2 Hz, 2H), 7.57 (t, *J* = 7.6 Hz, 1H), 7.45 (t, *J* = 7.8 Hz, 2H), 7.20 (d, *J* = 8.8 Hz, 1H). <sup>13</sup>C NMR (151 MHz, CDCl<sub>3</sub>) δ 200.7, 177.0, 158.8, 154.0, 138.9, 138.8, 137.4, 132.9, 128.5, 128.4, 128.0, 118.9, 118.9, 117.3, 116.8, 100.9. HRMS (ESI) calcd for C<sub>16</sub>H<sub>9</sub><sup>79</sup>BrNaO<sub>4</sub><sup>+</sup> [*M* + Na<sup>+</sup>] 366.9576, found 366.9577.

**6*H*,7*H*-Chromeno[4,3-*b*]chromene-6,7-dione (Frutinone A)**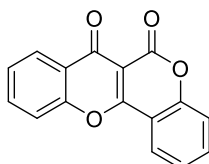

Following the general procedure, Frutinone **A** was purified by silica gel chromatography (25% EtOAc/PE). Yield: 119 mg, 45%, a white solid, mp. 234 – 236 °C. <sup>1</sup>H NMR (600 MHz, CDCl<sub>3</sub>) δ 8.35 (dd, *J* = 7.8, 1.6 Hz, 1H), 8.22 (dd, *J* = 8.0, 1.4 Hz, 1H), 7.81 – 7.73 (m, 2H), 7.64 (d, *J* = 8.4 Hz, 1H), 7.51 (t, *J* = 7.6 Hz, 1H), 7.46 (dd, *J* = 11.4, 3.8 Hz, 1H), 7.41 (d, *J* = 8.4 Hz, 1H). <sup>13</sup>C NMR (150 MHz, CDCl<sub>3</sub>) δ 173.0, 165.0, 156.3, 154.4, 154.3, 135.6, 134.9, 126.9, 126.7, 124.9, 124.5, 124.2, 117.9, 117.5, 113.3, 105.1. HRMS (ESI) calcd for C<sub>16</sub>H<sub>8</sub>NaO<sub>4</sub><sup>+</sup> [*M* + Na<sup>+</sup>] 287.0315, found 287.0315.

#### 4. The HRMS analysis of PhIO/DMF reaction system

To a suspension of PhIO (1.0 mmol) in MeOH (5 mL) at room temperature. Then the resulting mixture was kept at room temperature. After one hour, the HRMS analysis of the reaction mixture was carried out and the result showed that (PhIO)<sub>n</sub> would undergo depolymerization to give PhIO species in DMF.

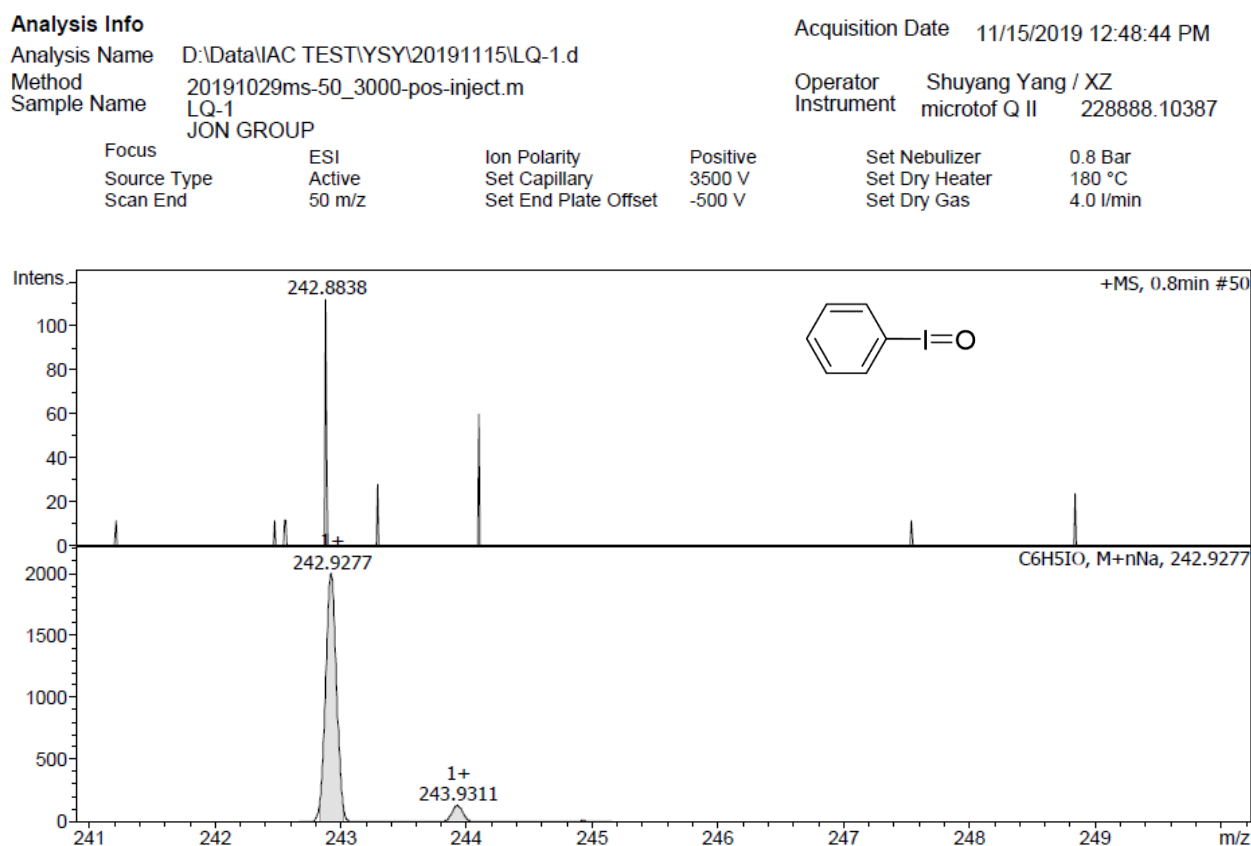

---

## 5. References

1. Saltzman, H. Sharefkin, J. G. *Org. Synth.* **1973**, *5*, 658-660.
- 2 Zhao, X. H.; Ma, K. P.; Zhong, Z. H.; Zhou, Z. P.; Huang, X. Dai, D. J.; Wang, D. CN107176938 2017.
3. Cui, H.; Li, P.; Chai, Z.; Zheng, C.; Zhao, G.; Zhu, S. *J. Org. Chem.* **2019**, *74*, 1400–1402.
4. Boonsombat, J.; Thongnest, S.; Ruchirawat, S. *Eur. J. Org. Chem.* **2019**, 2971-2983.
5. Ding, T. Q.; Jiang, L. Q.; Yang, J.; Xu, Y. M.; Wang, G. X.; Yi, W. B. *Org. Lett.* **2019**, *21*, 6025–6028.



## 6. $^1\text{H}$ -NMR and $^{13}\text{C}$ -NMR Spectra

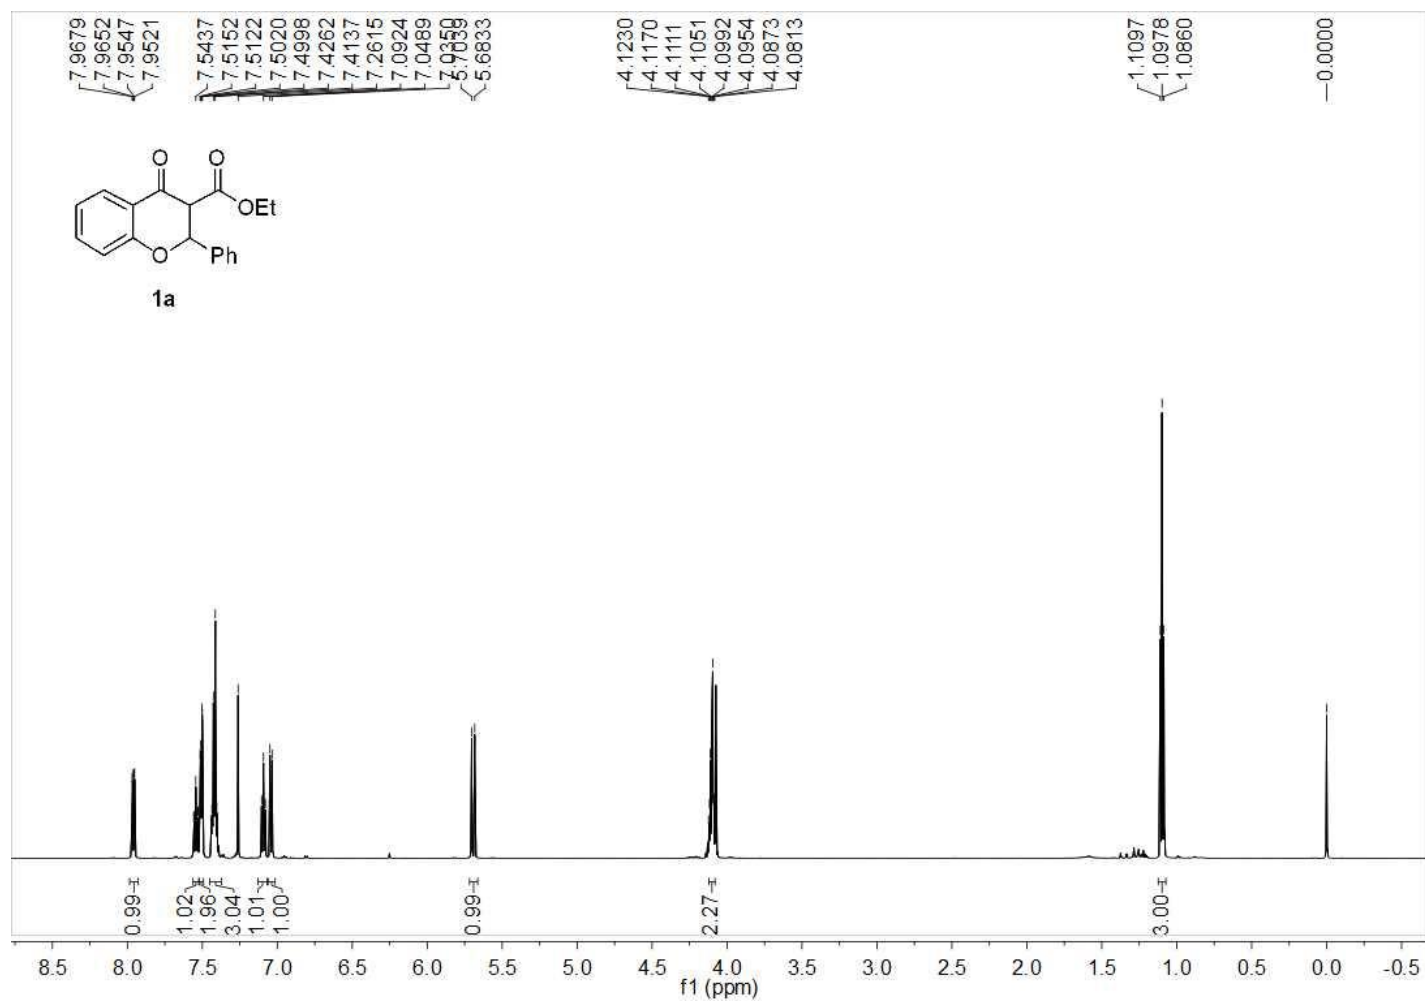

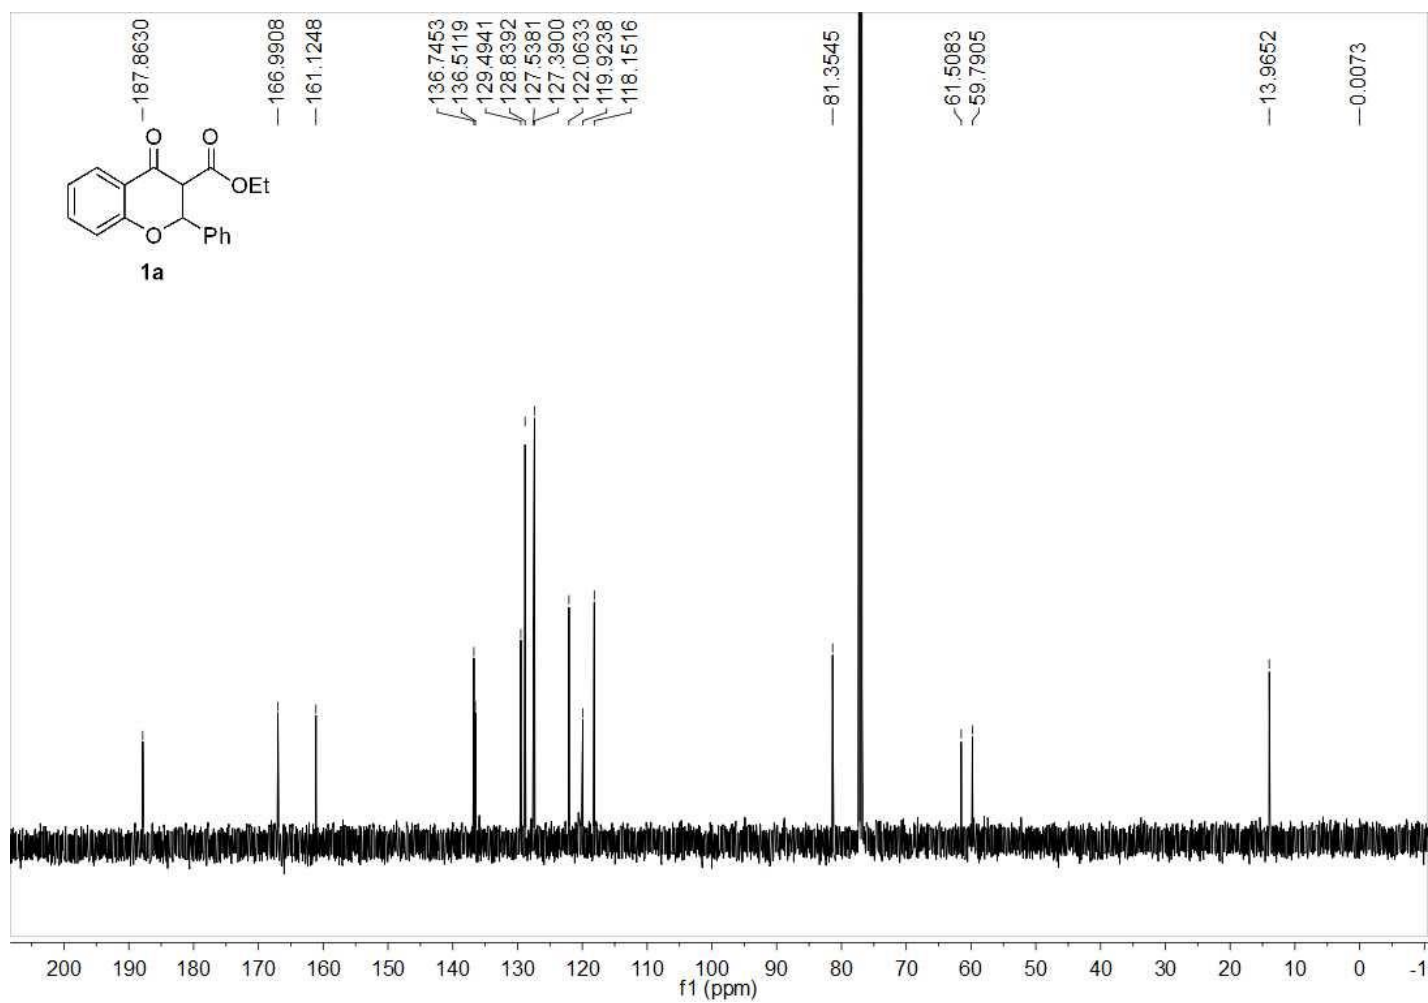

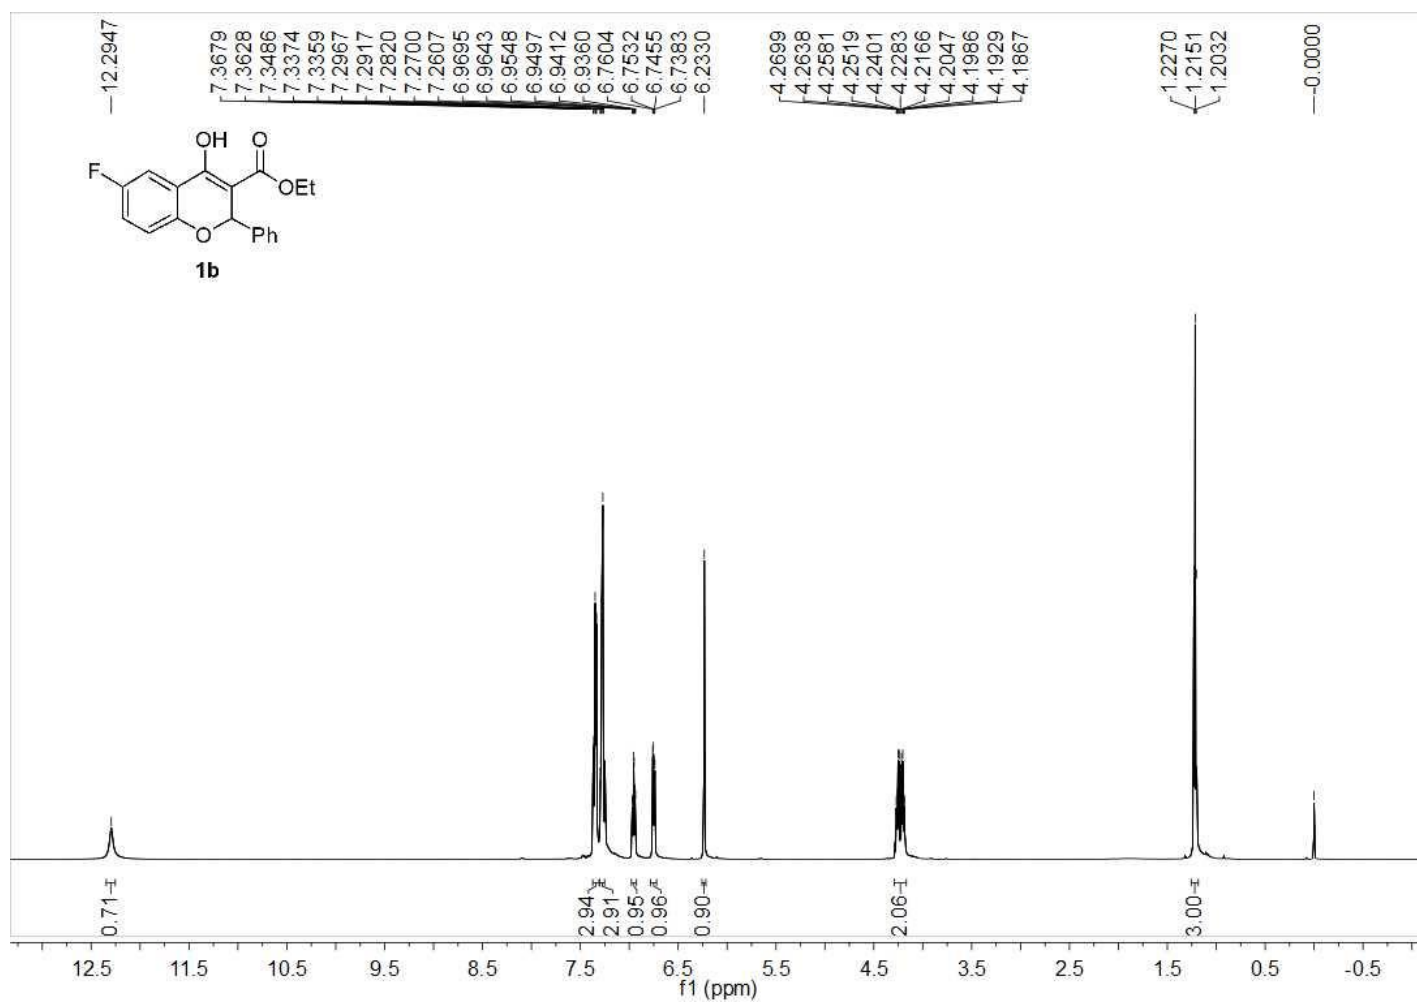

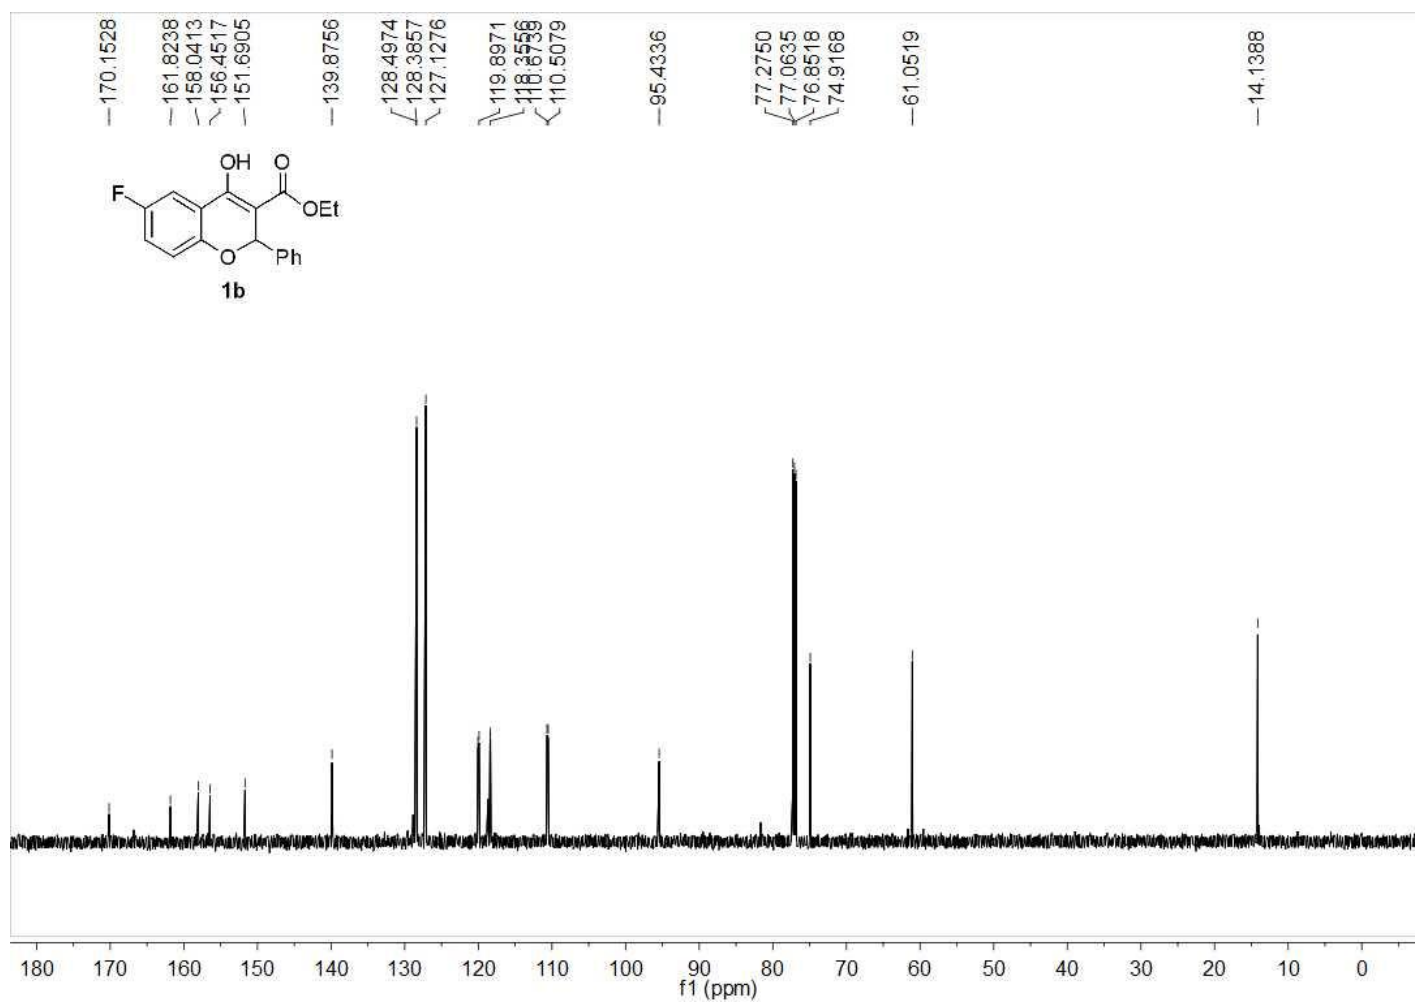

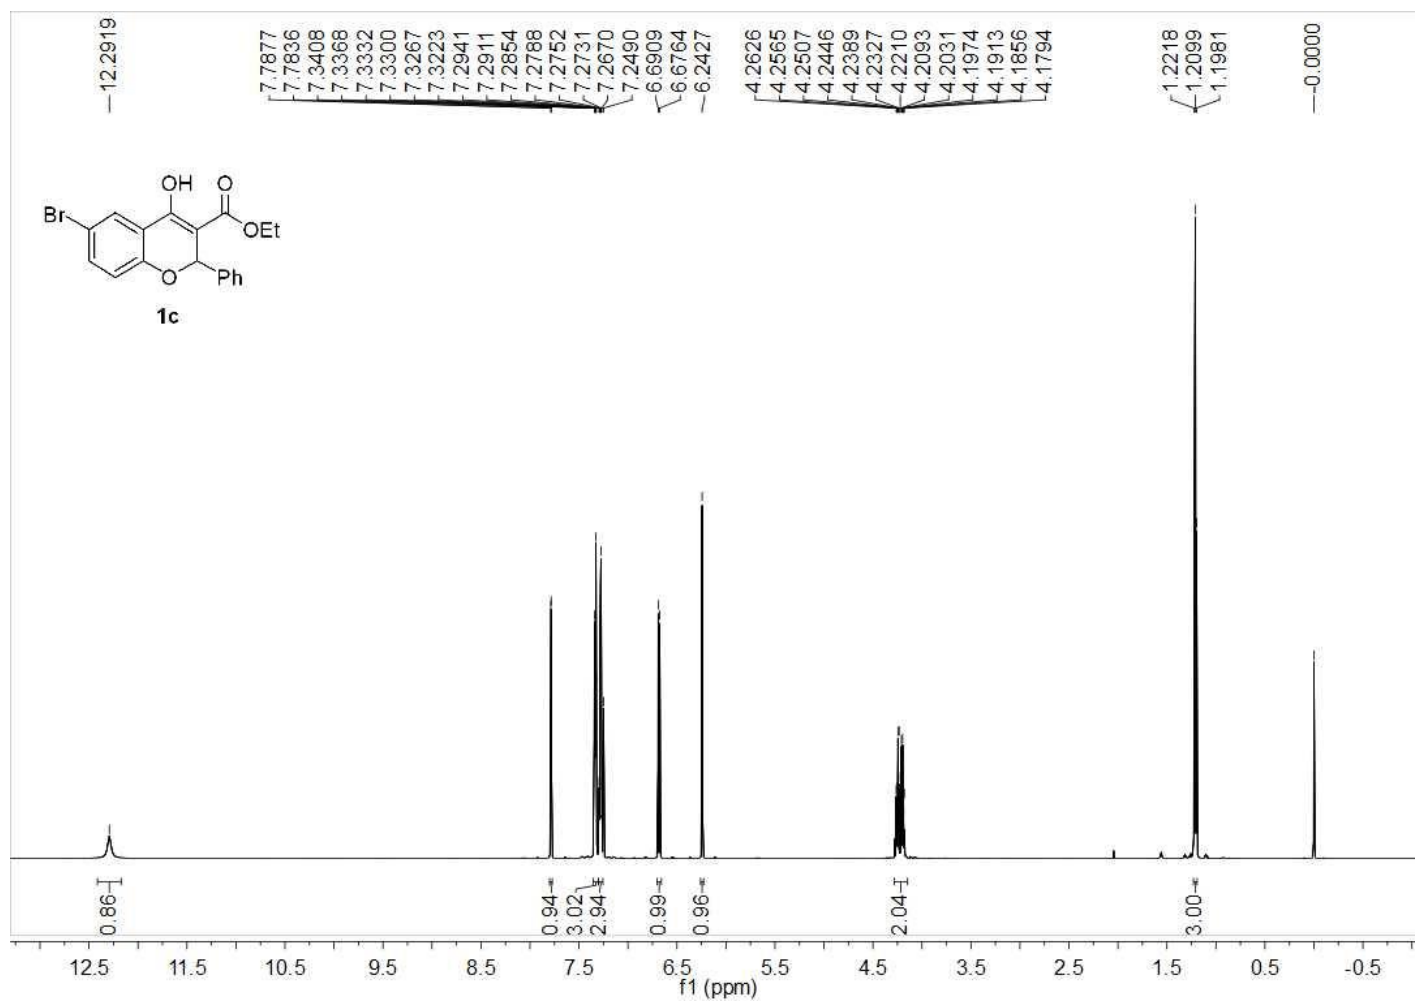

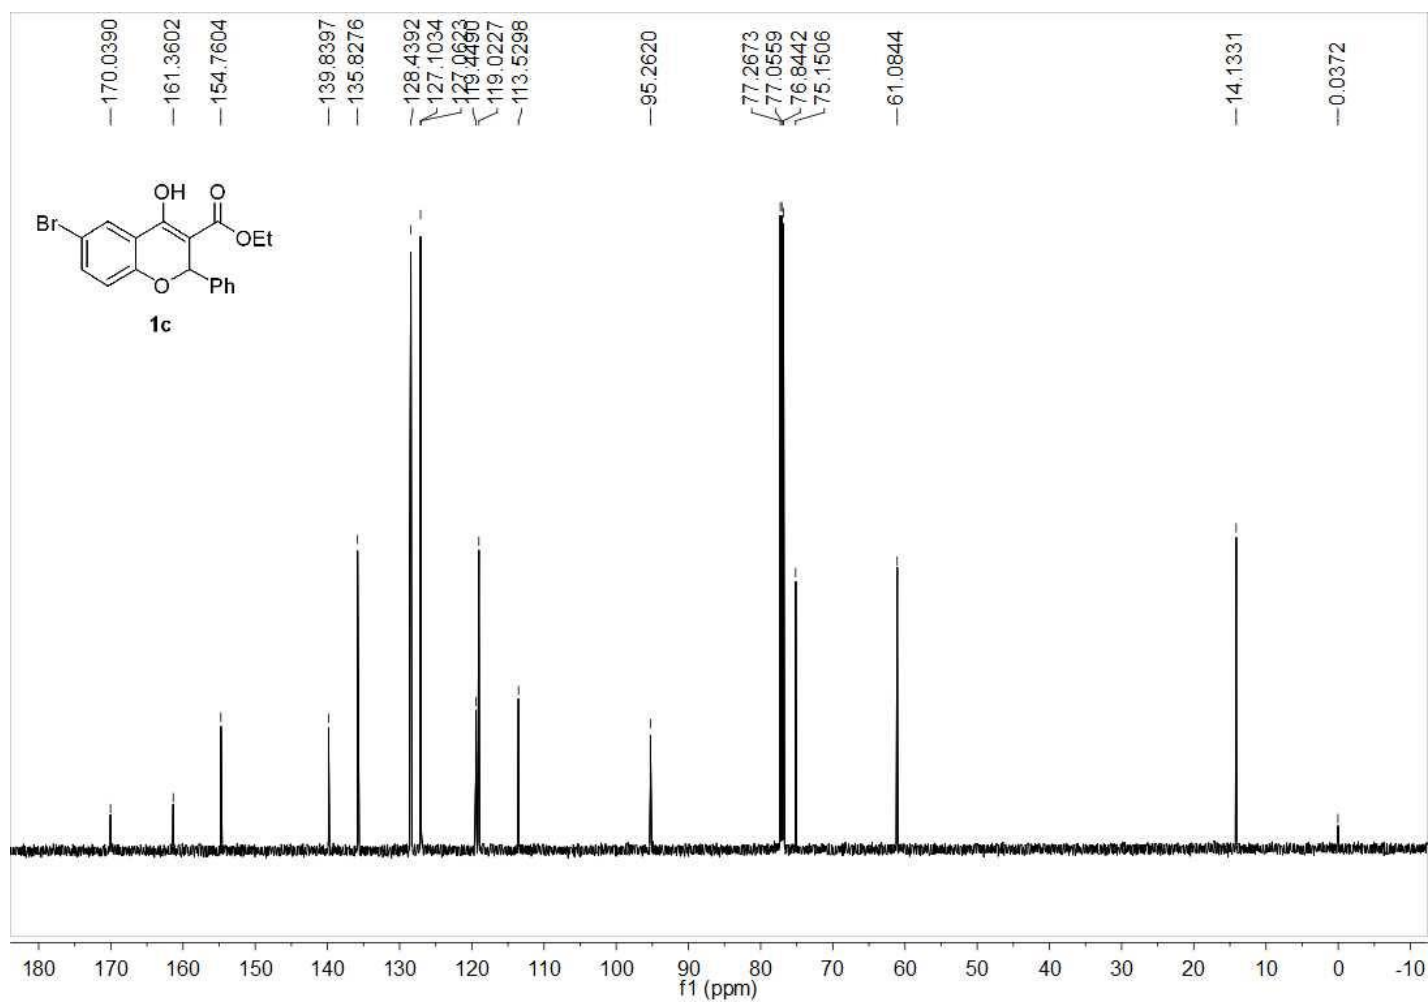

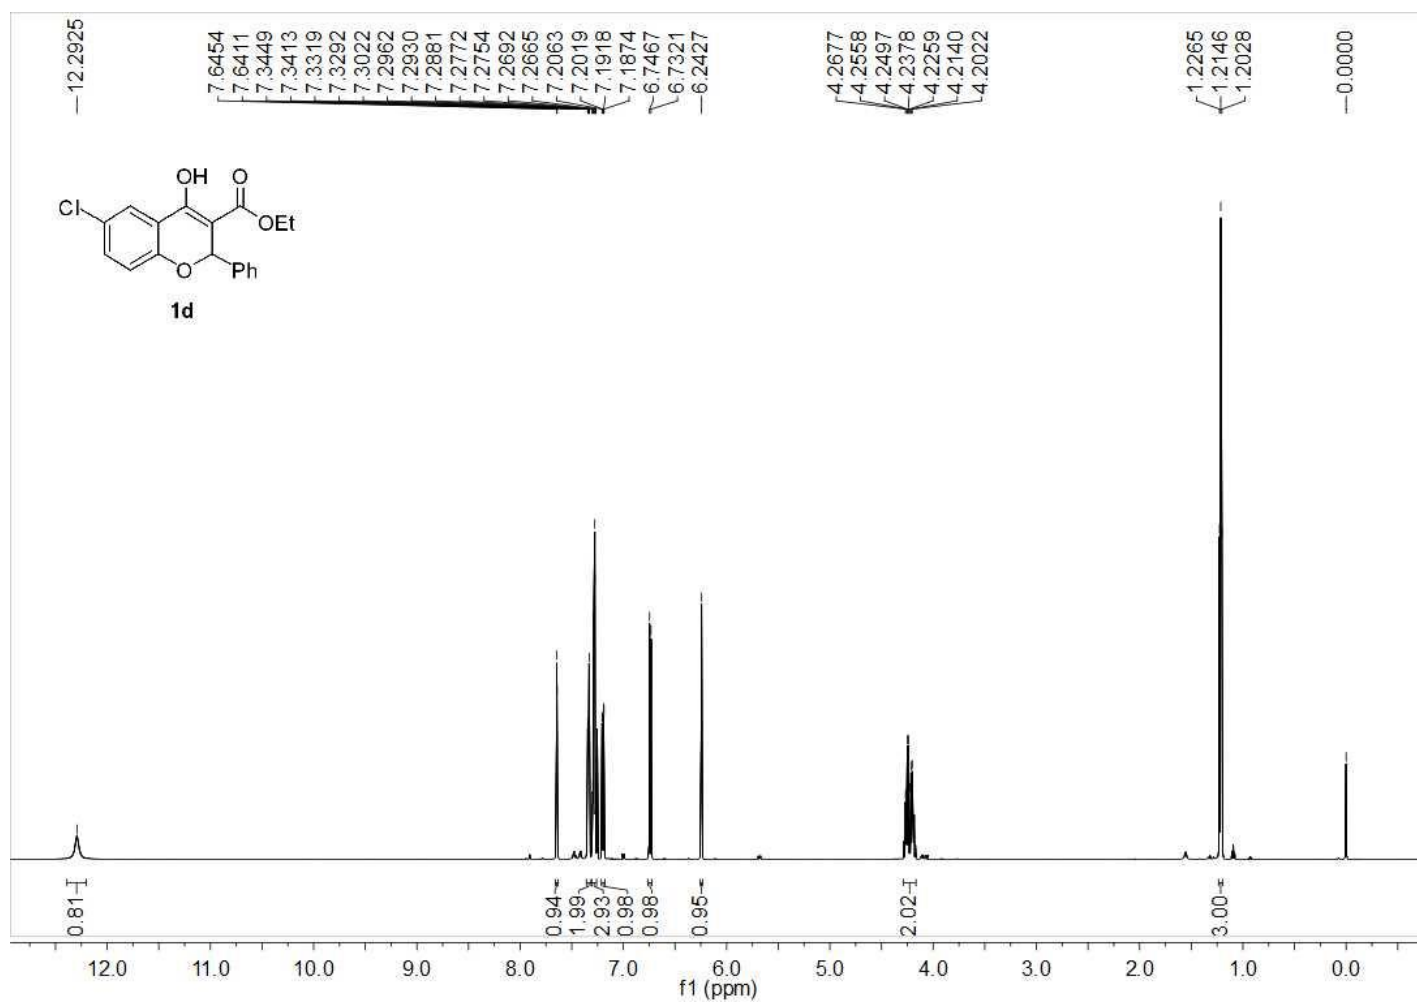

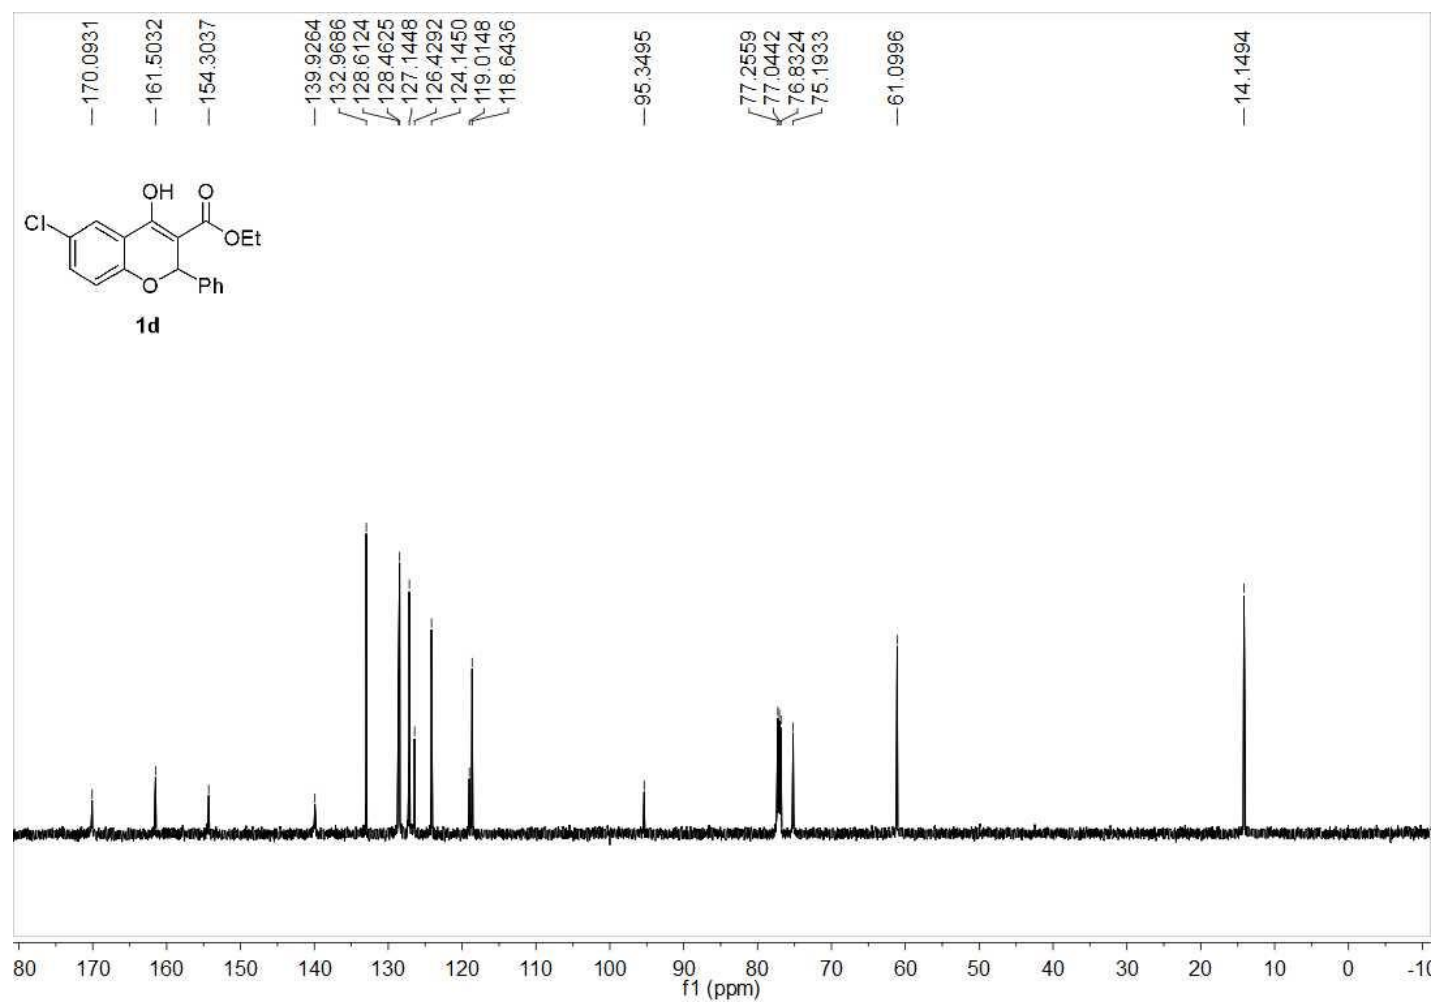



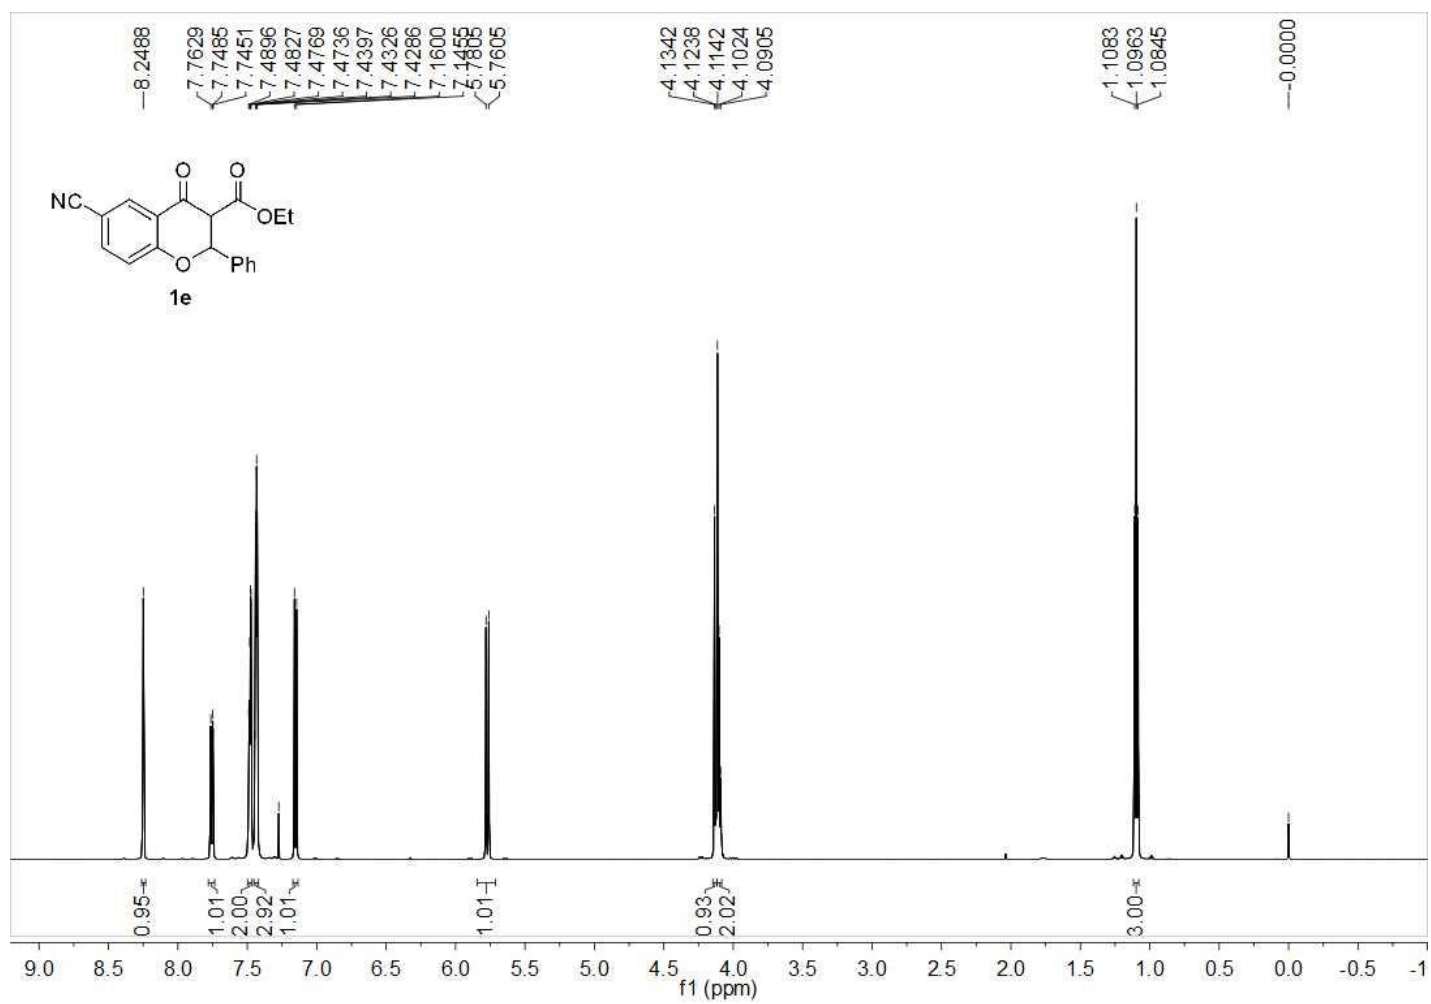

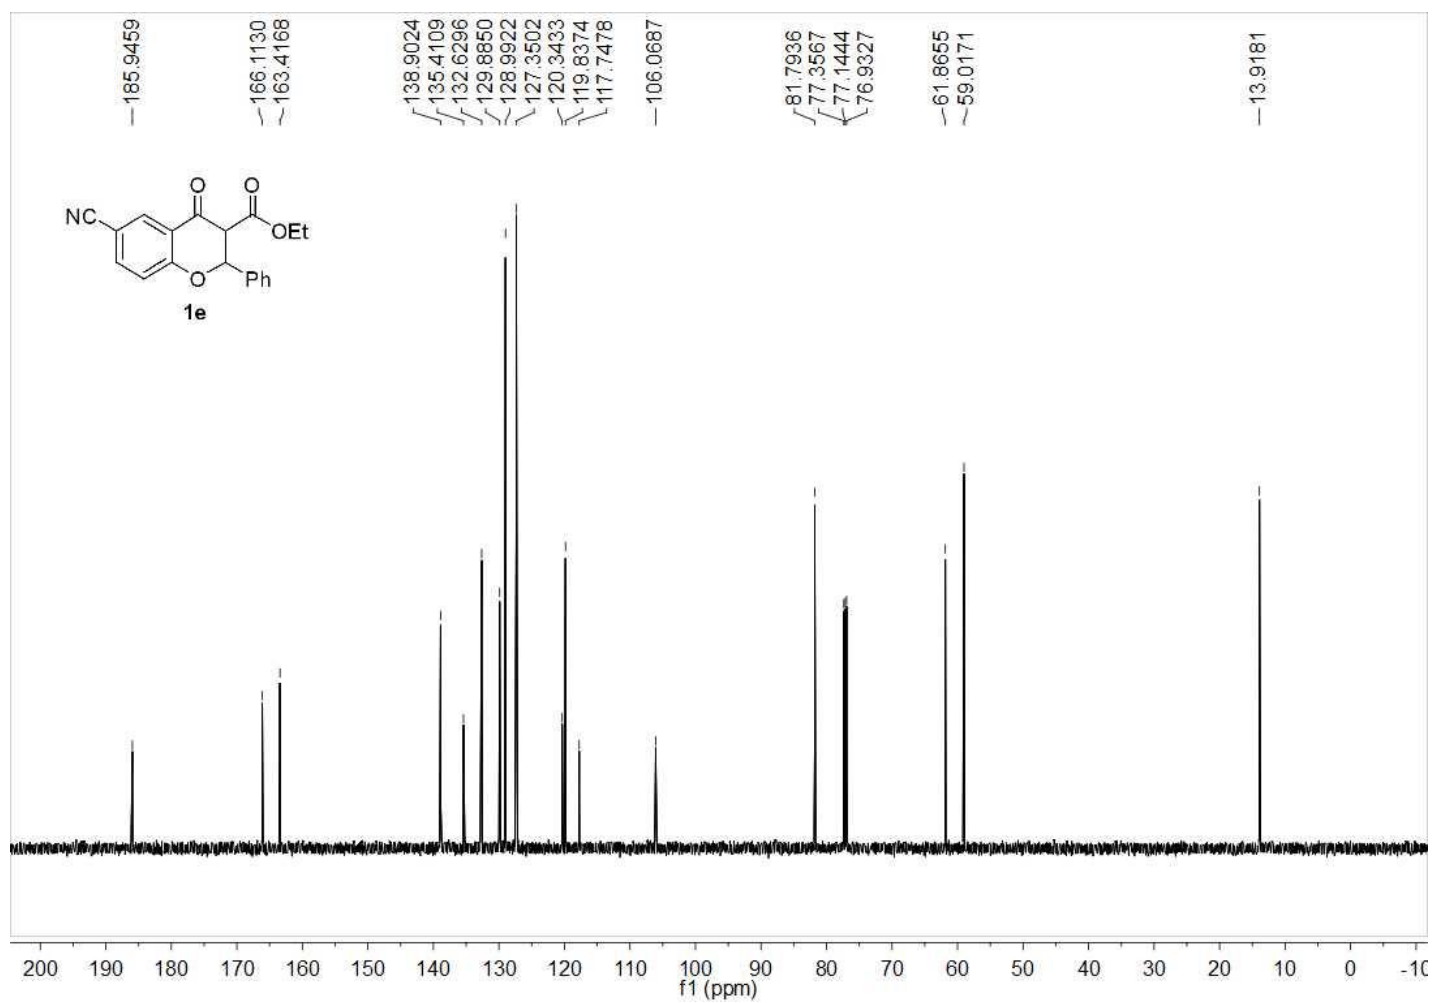

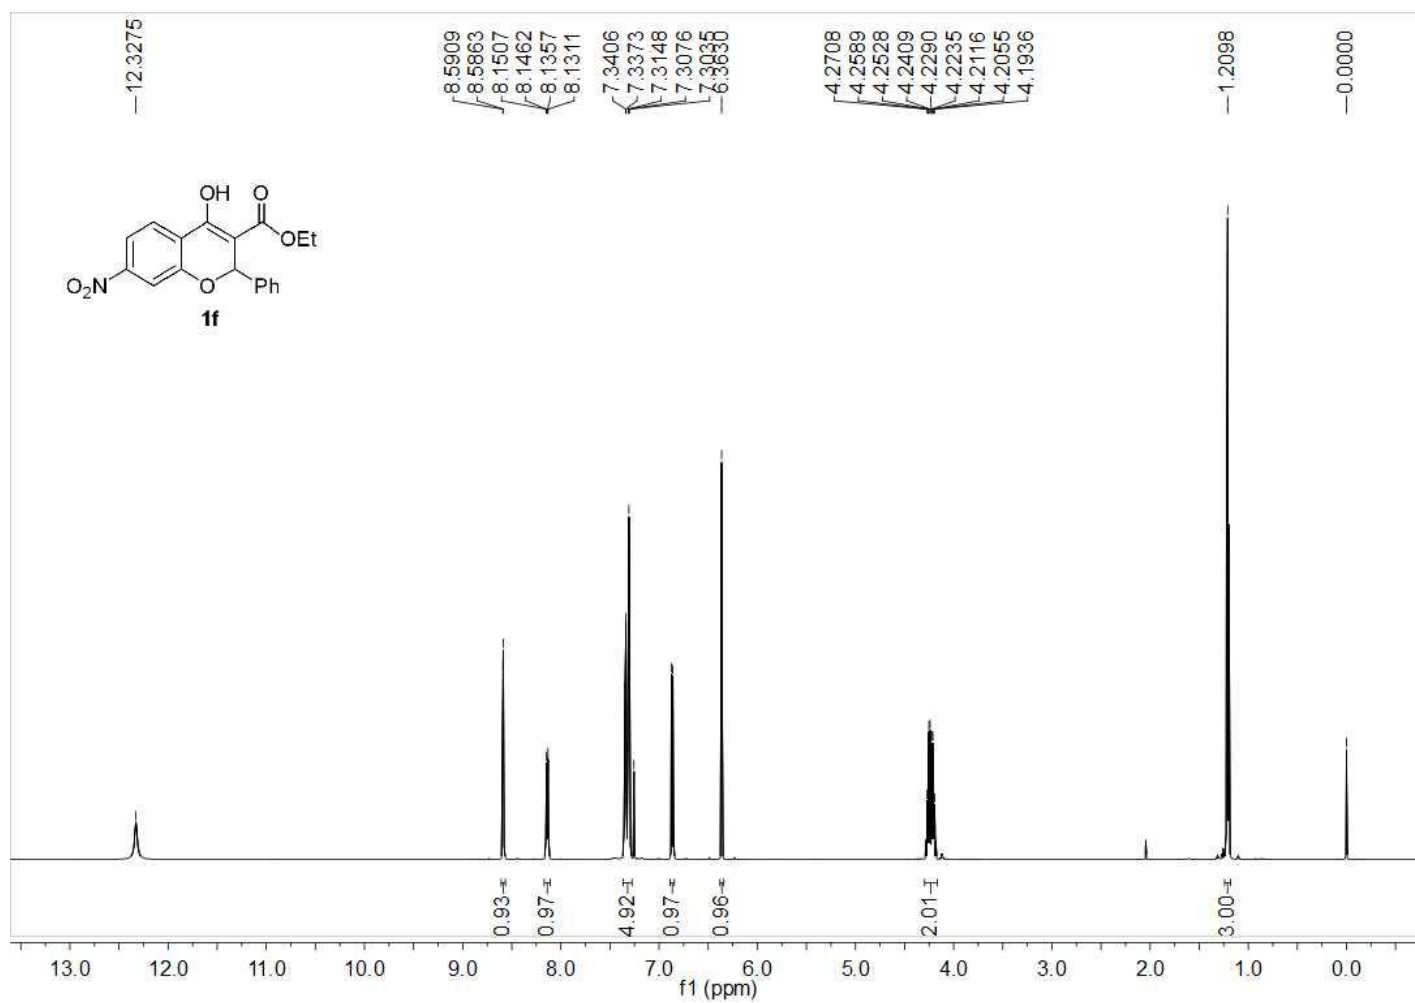

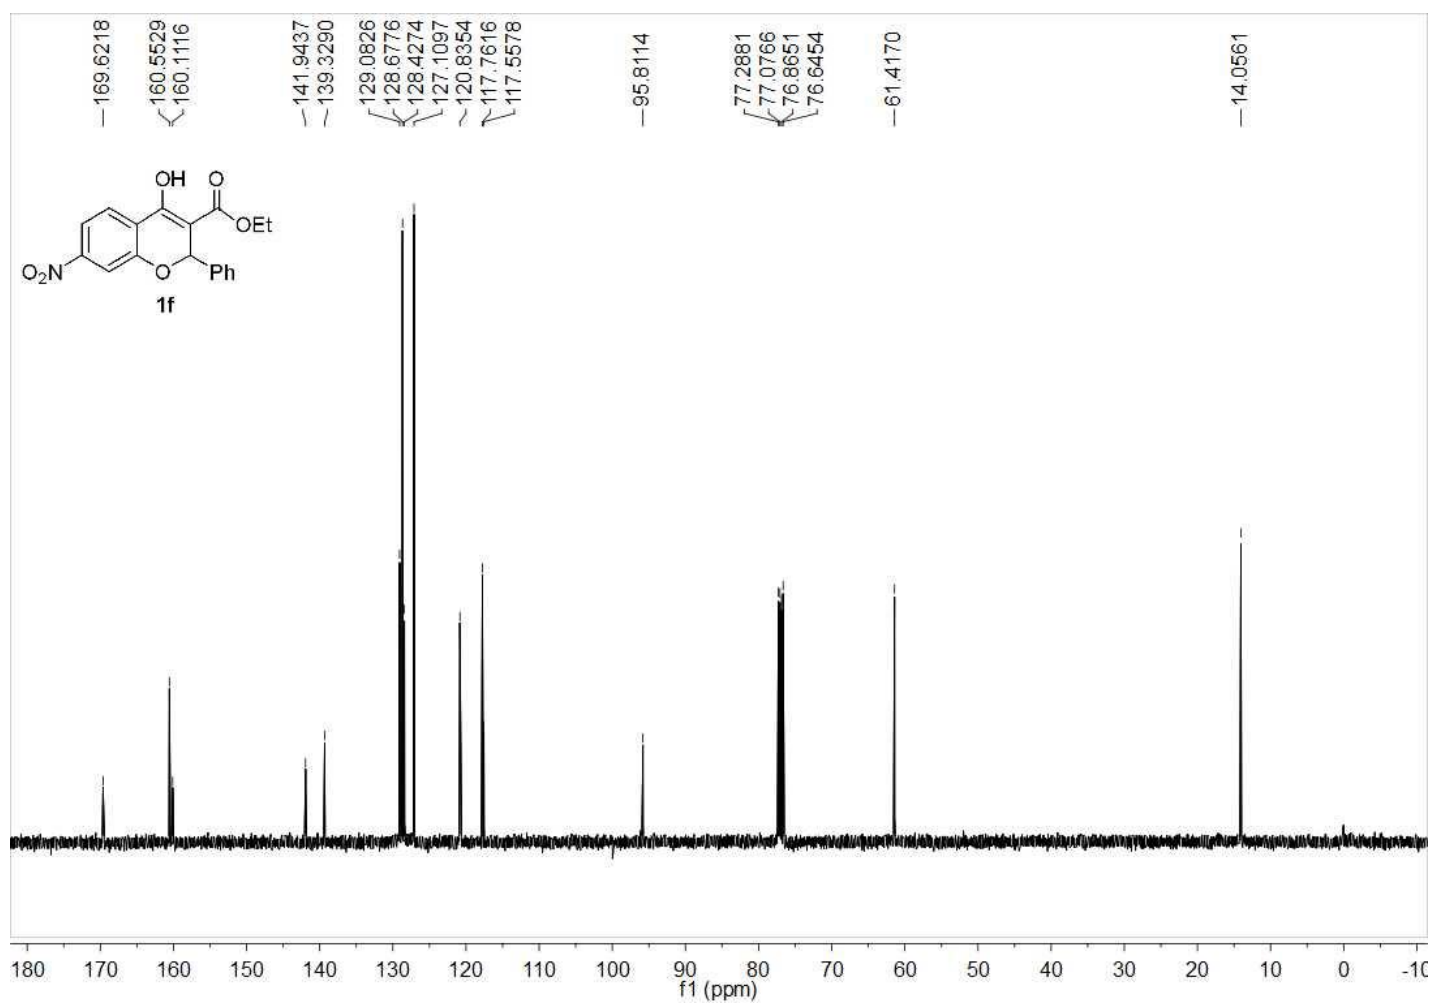

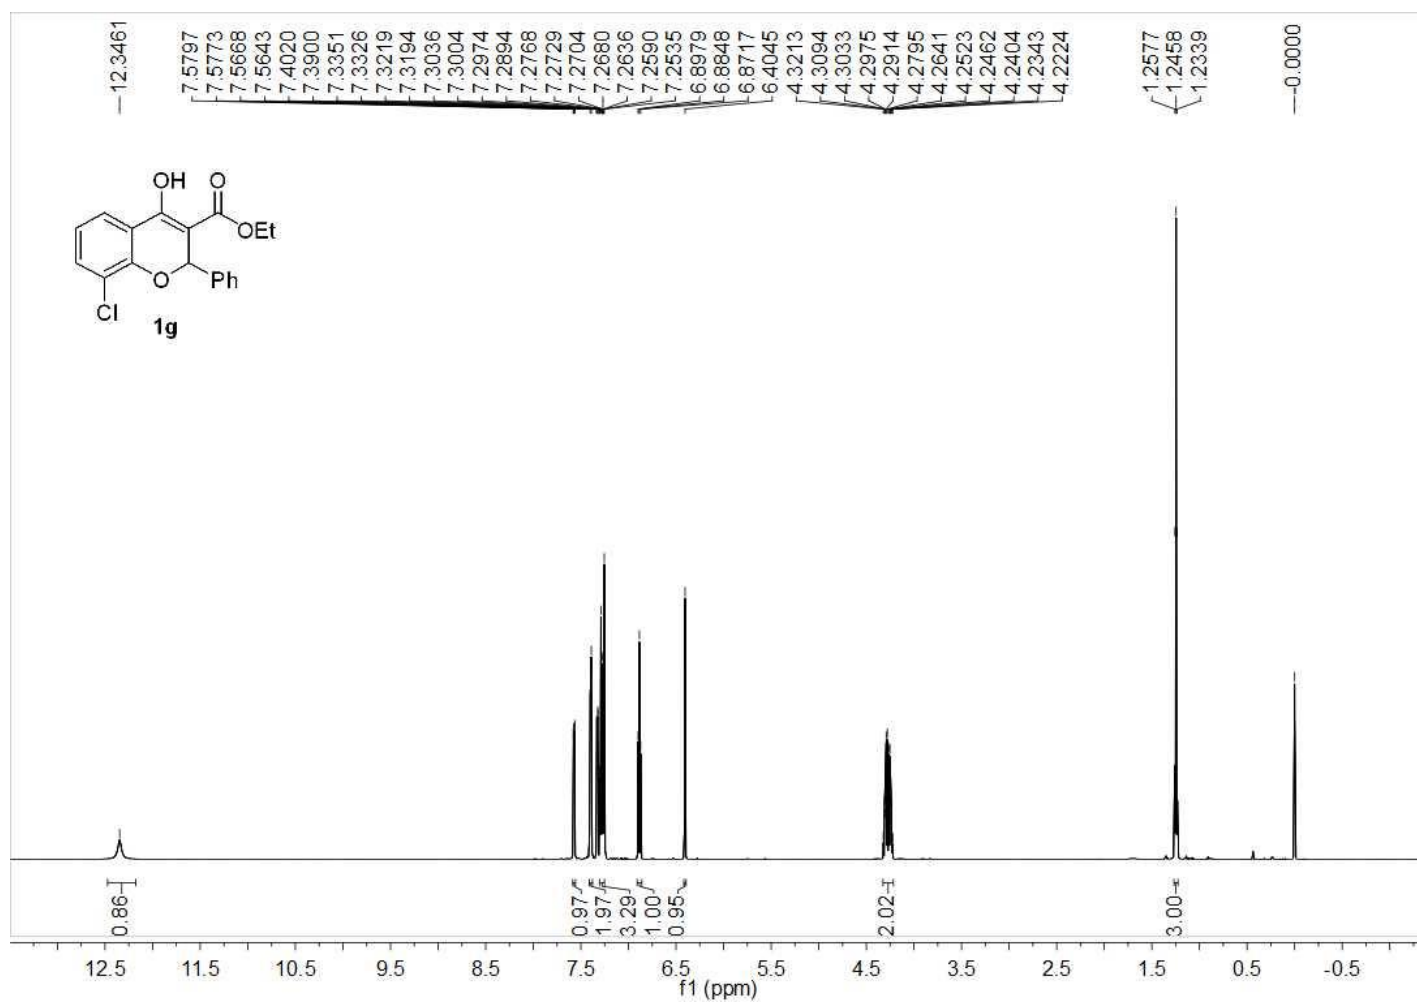

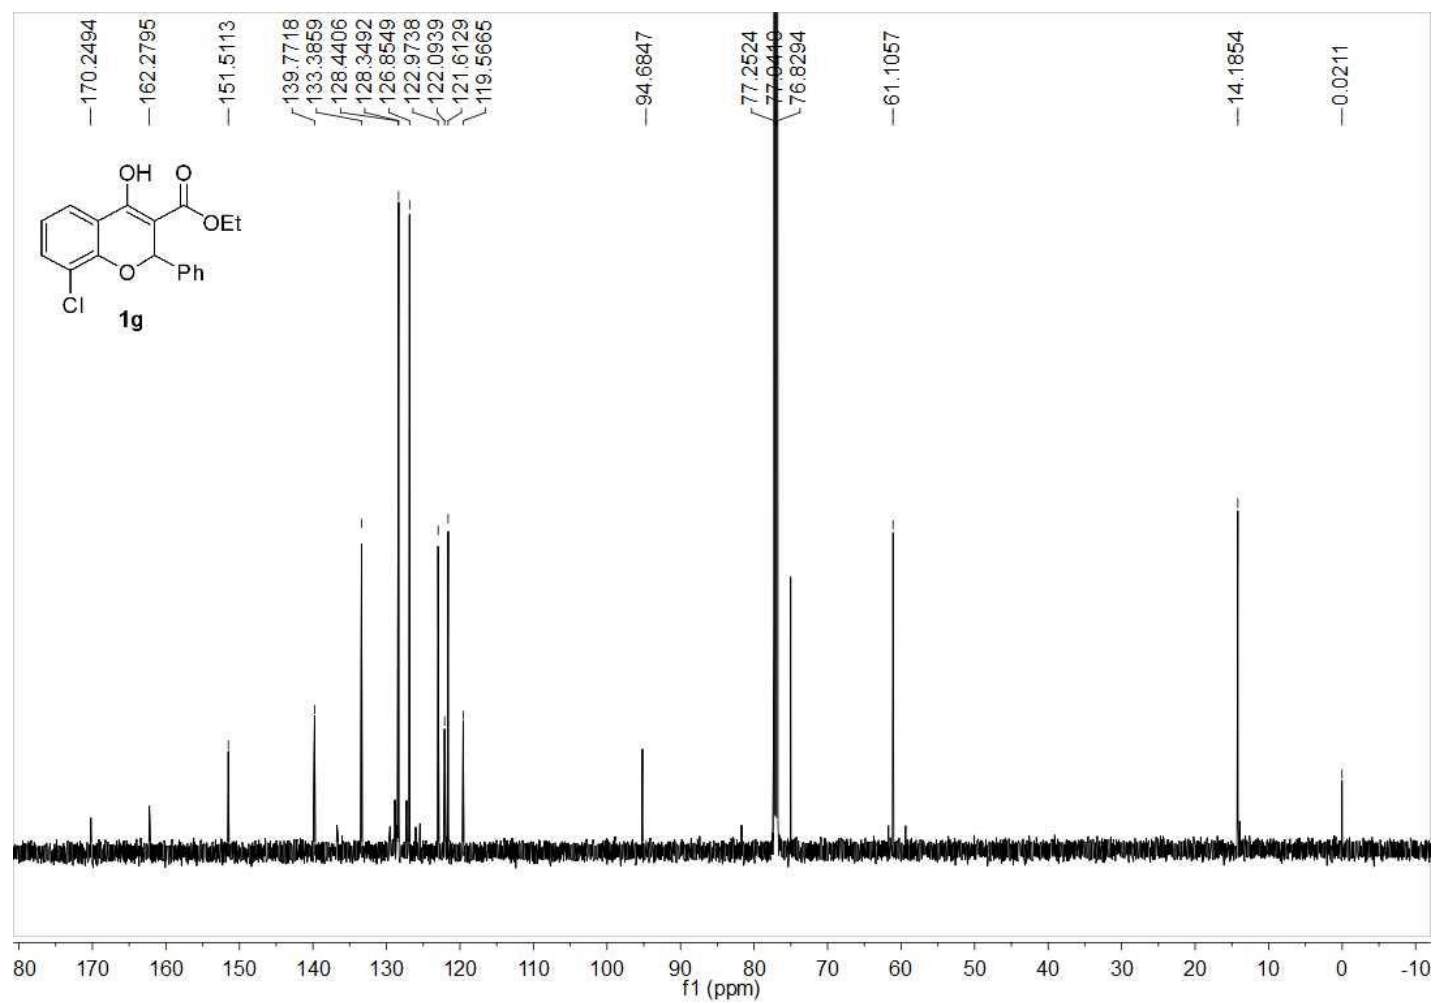

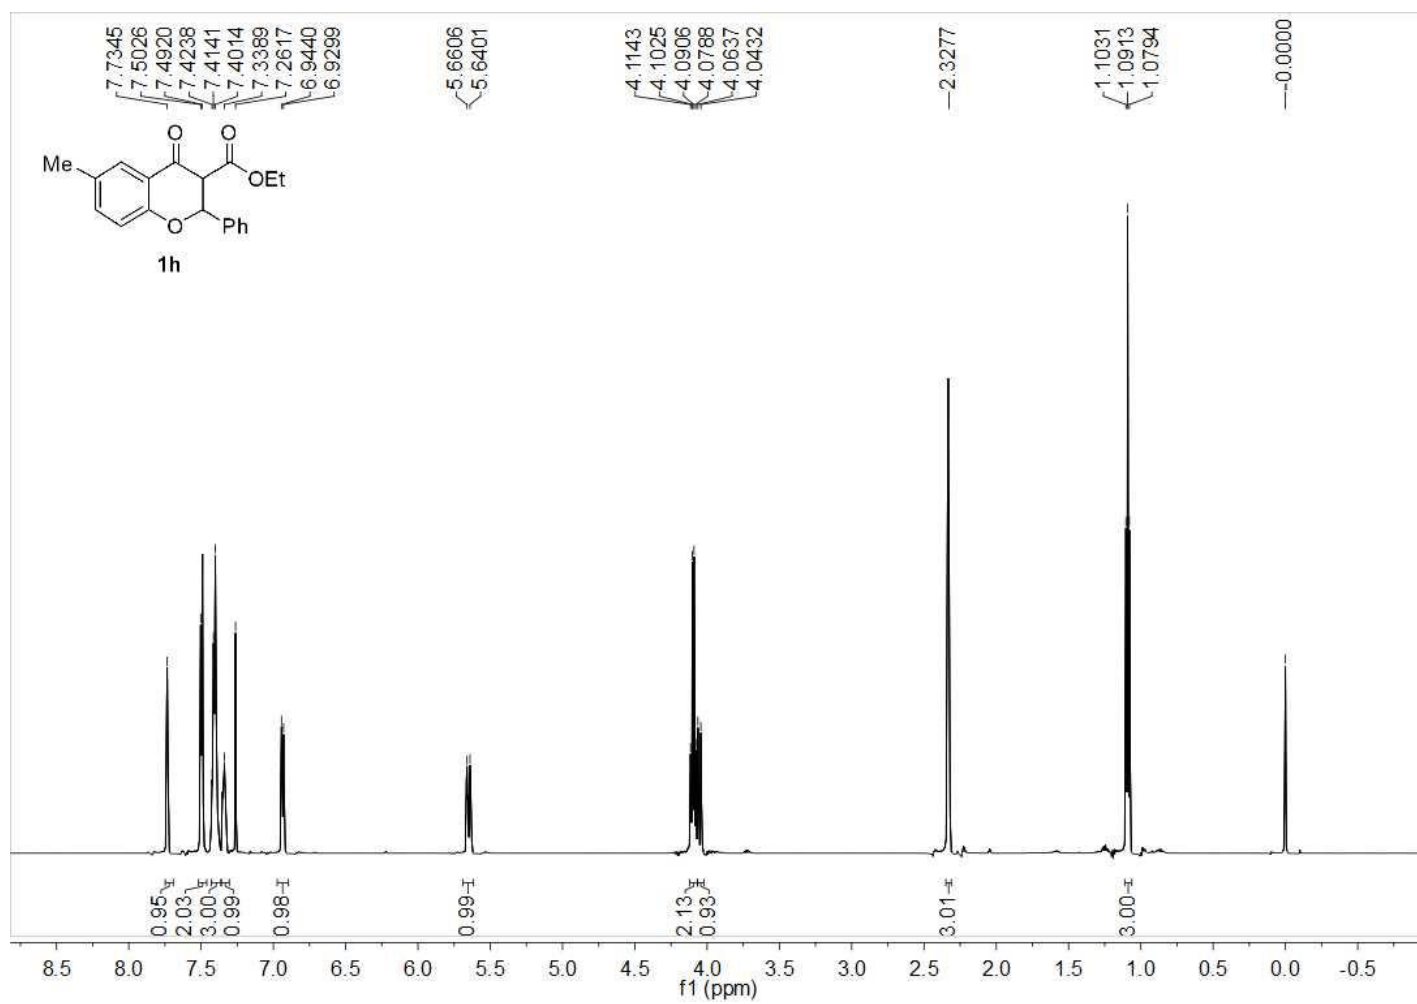

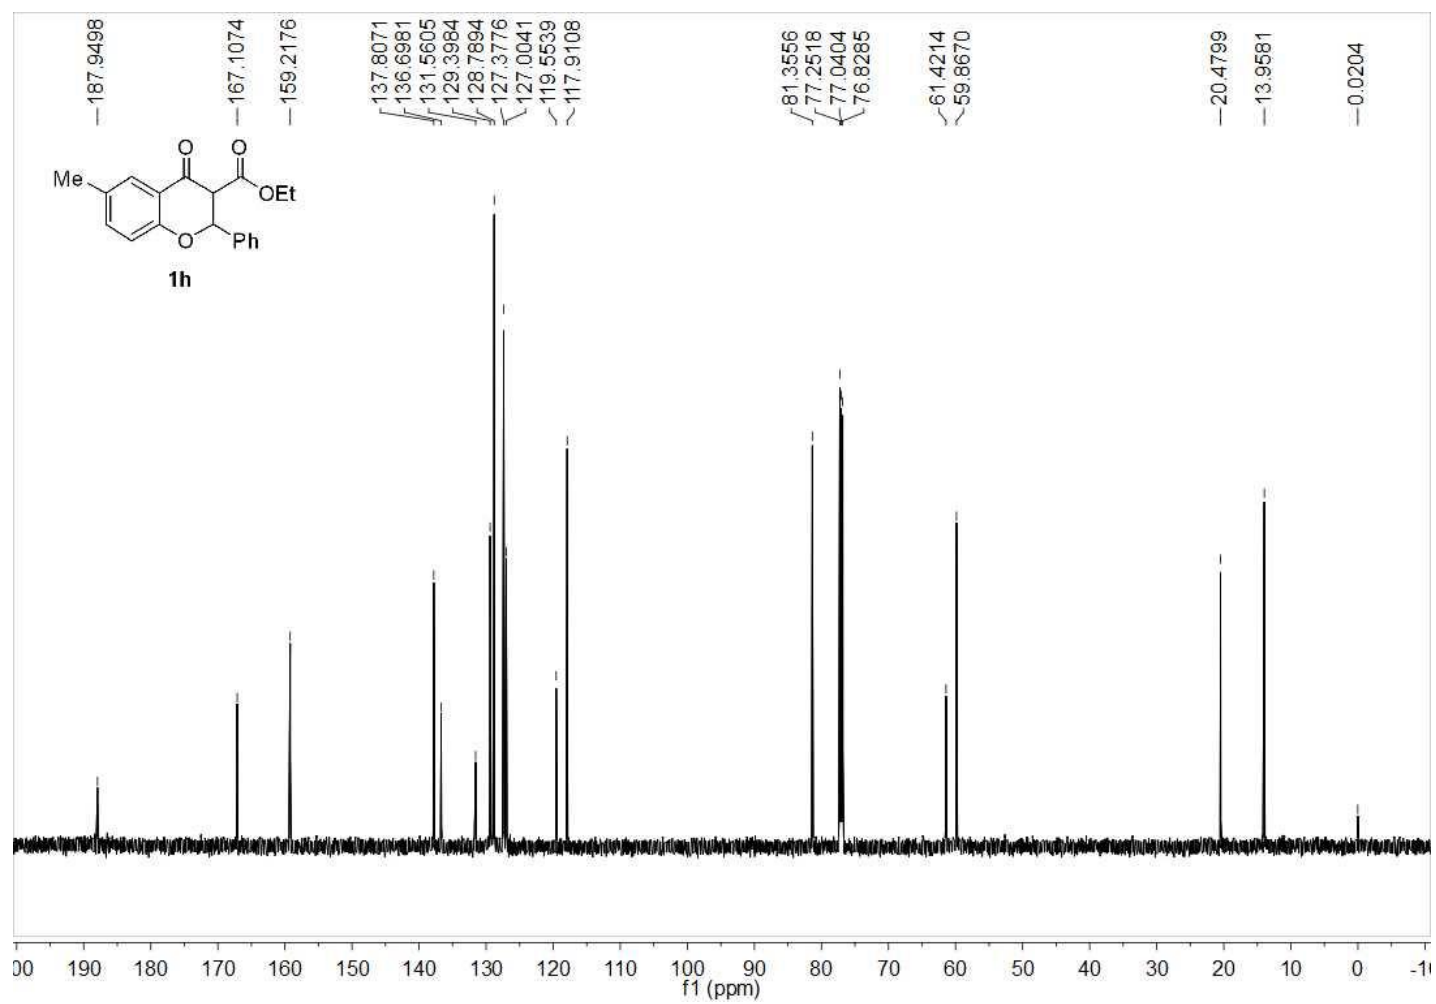



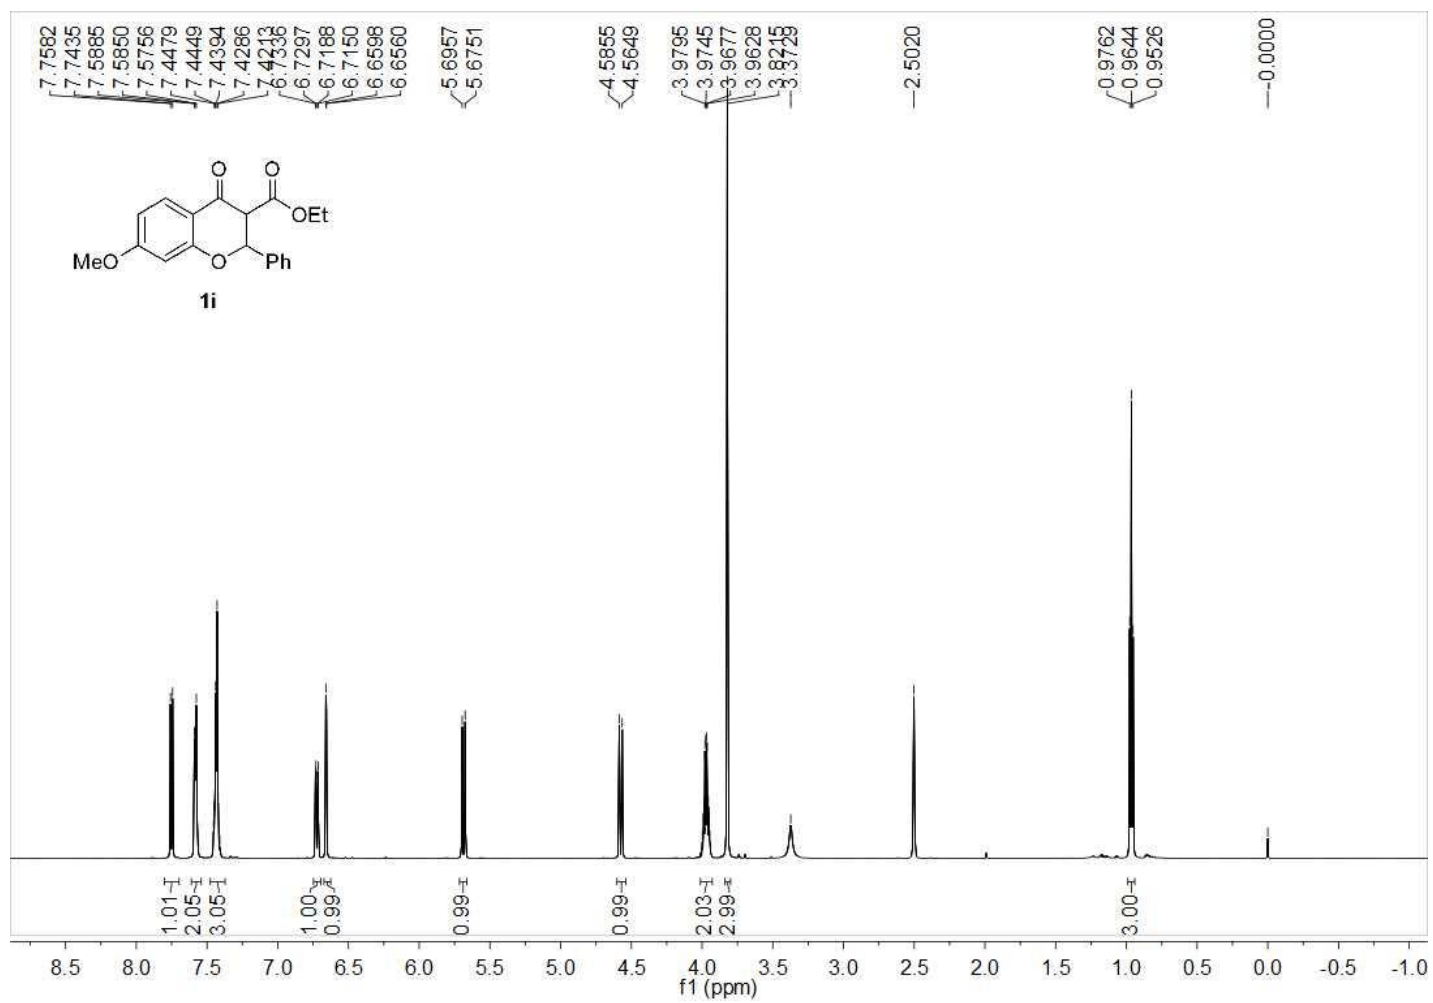

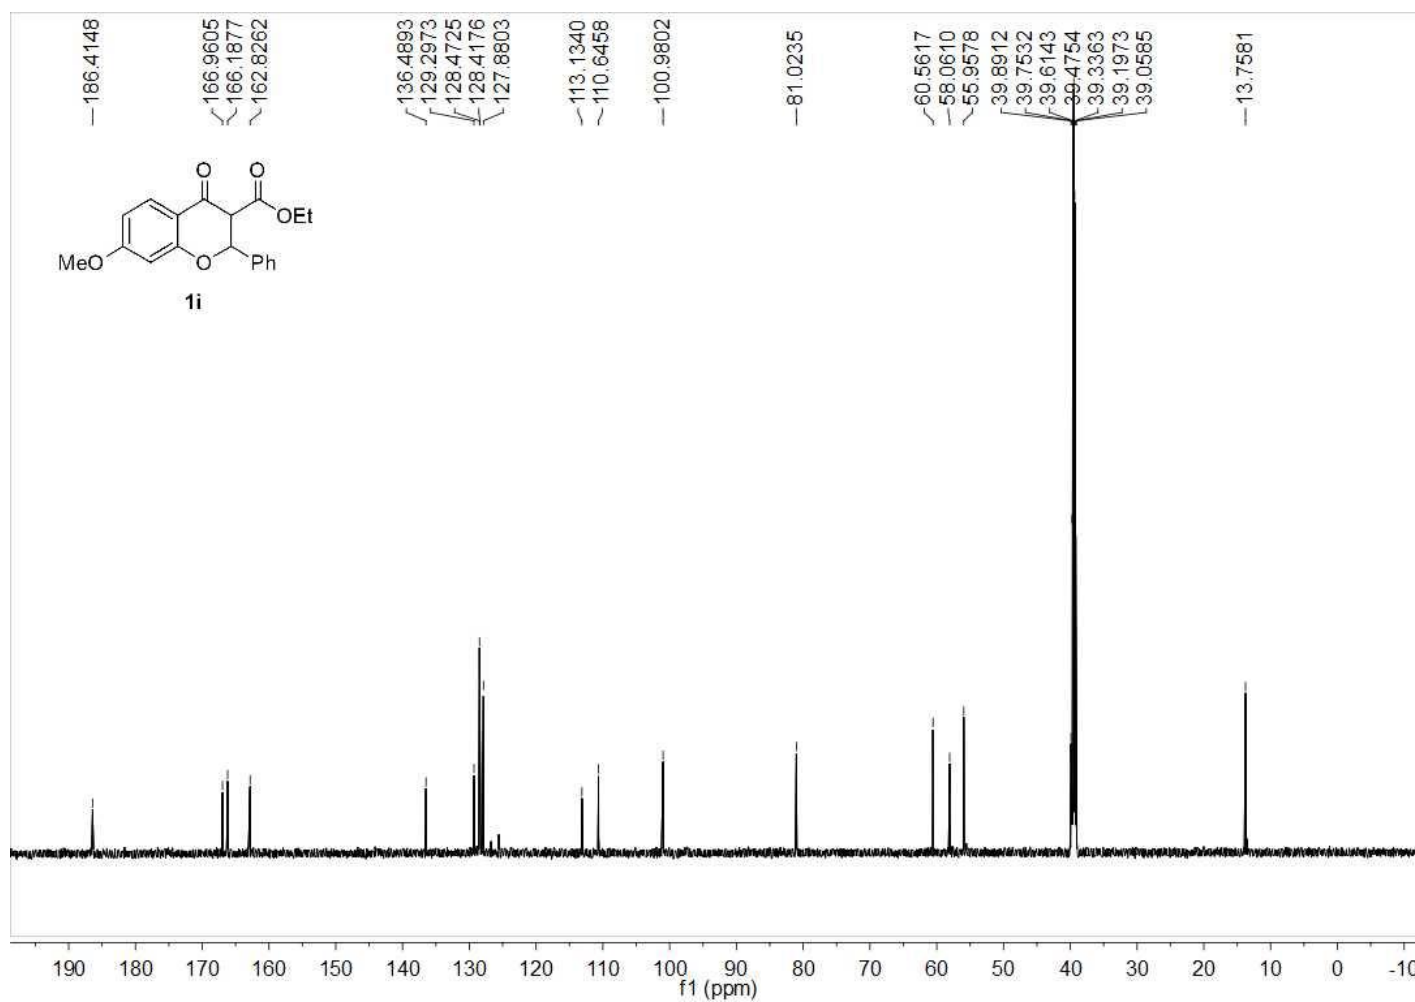

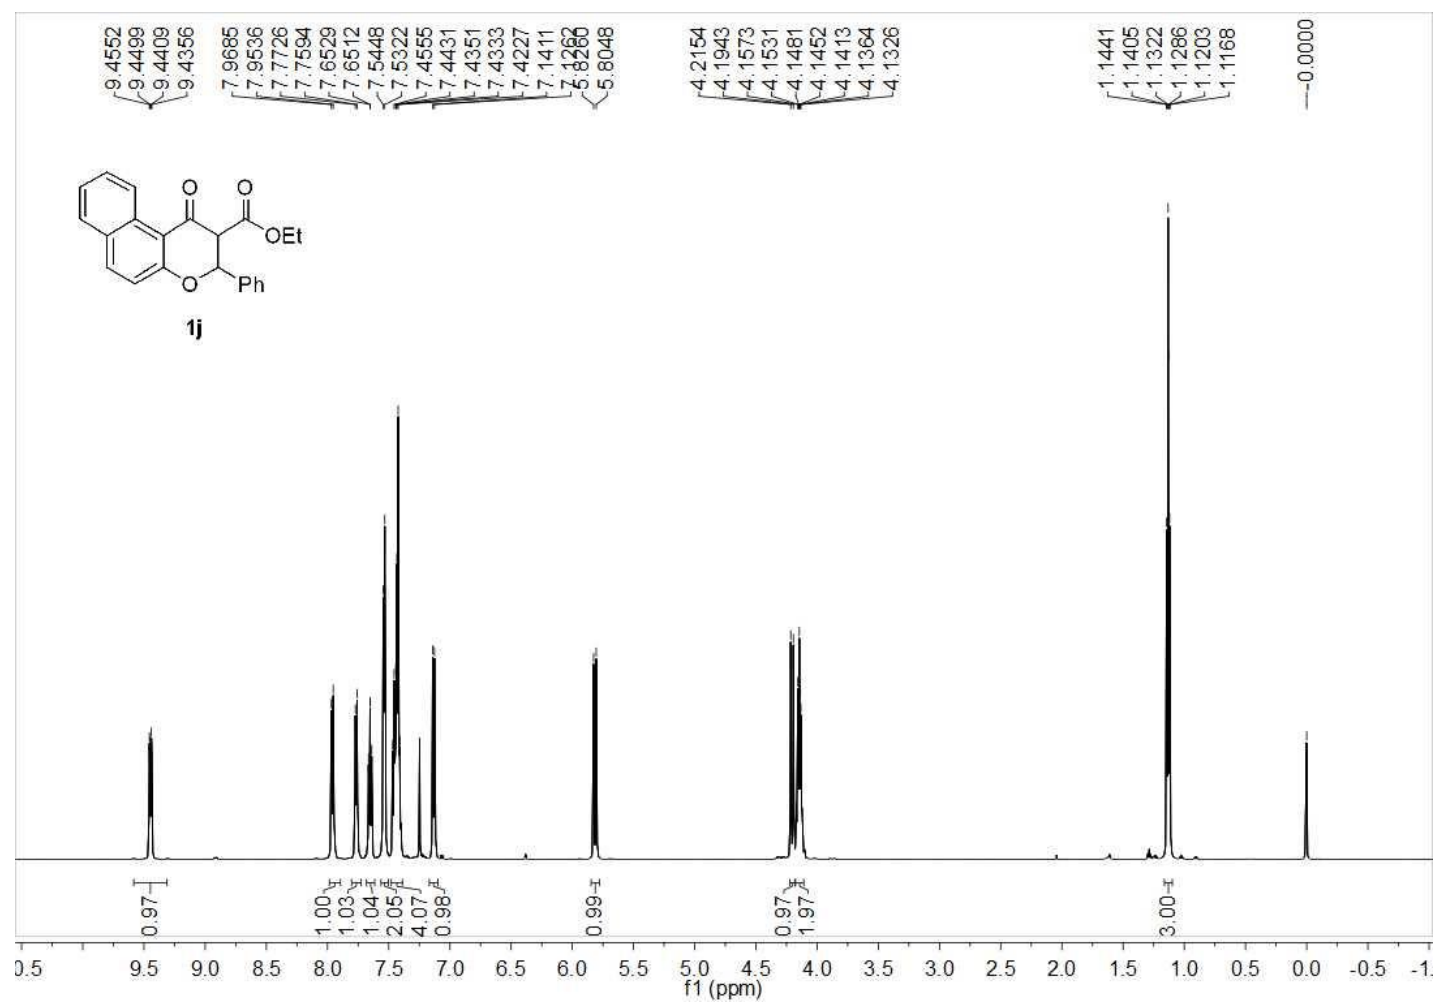

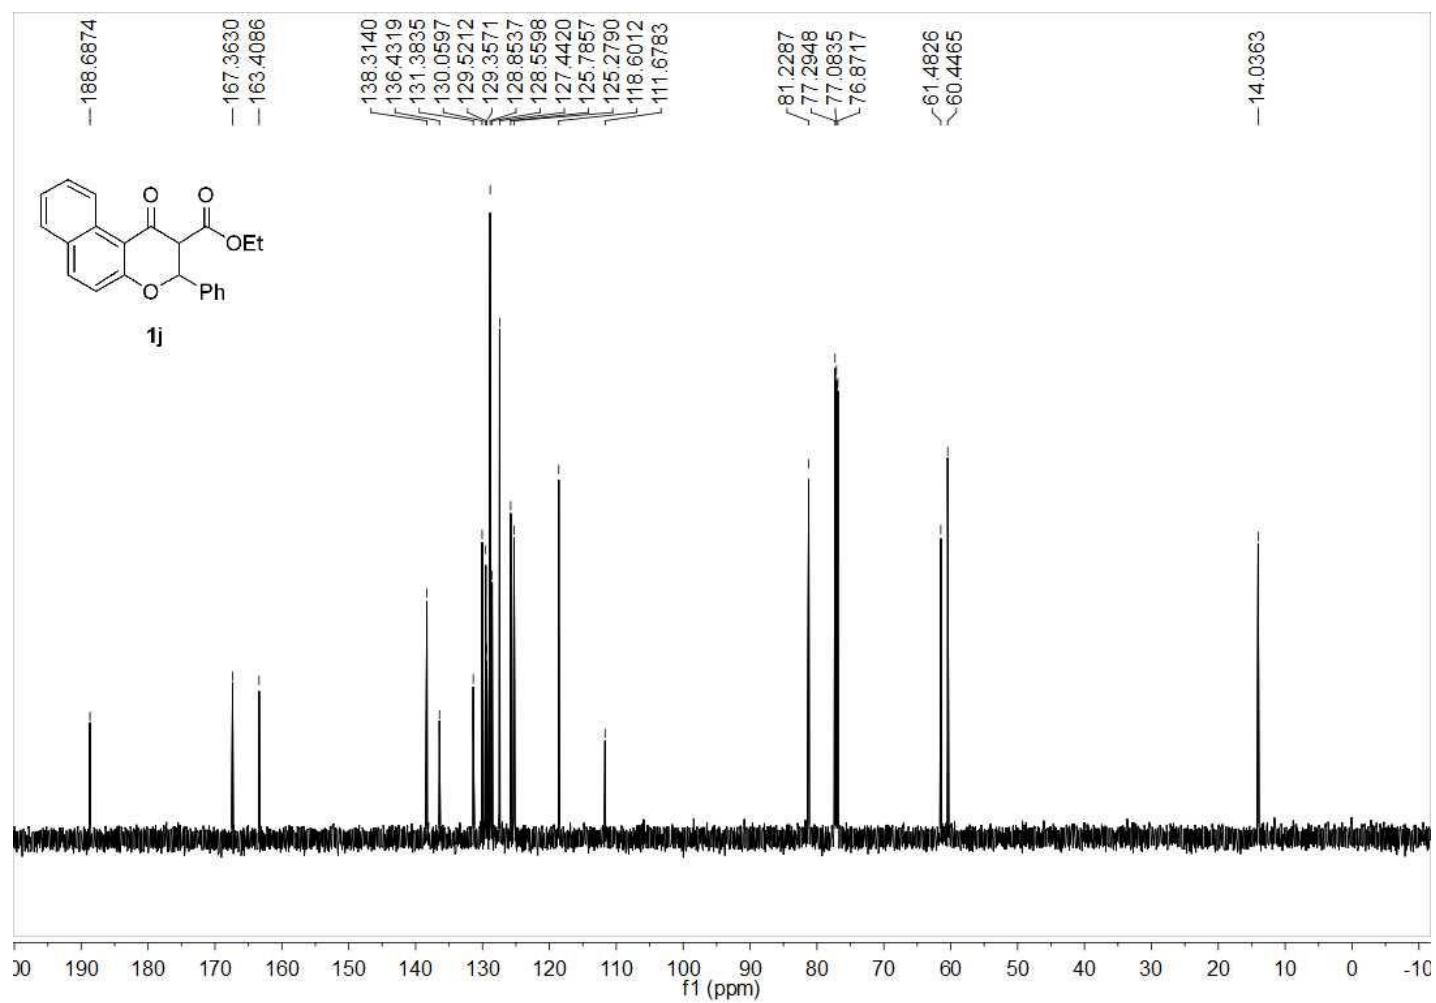

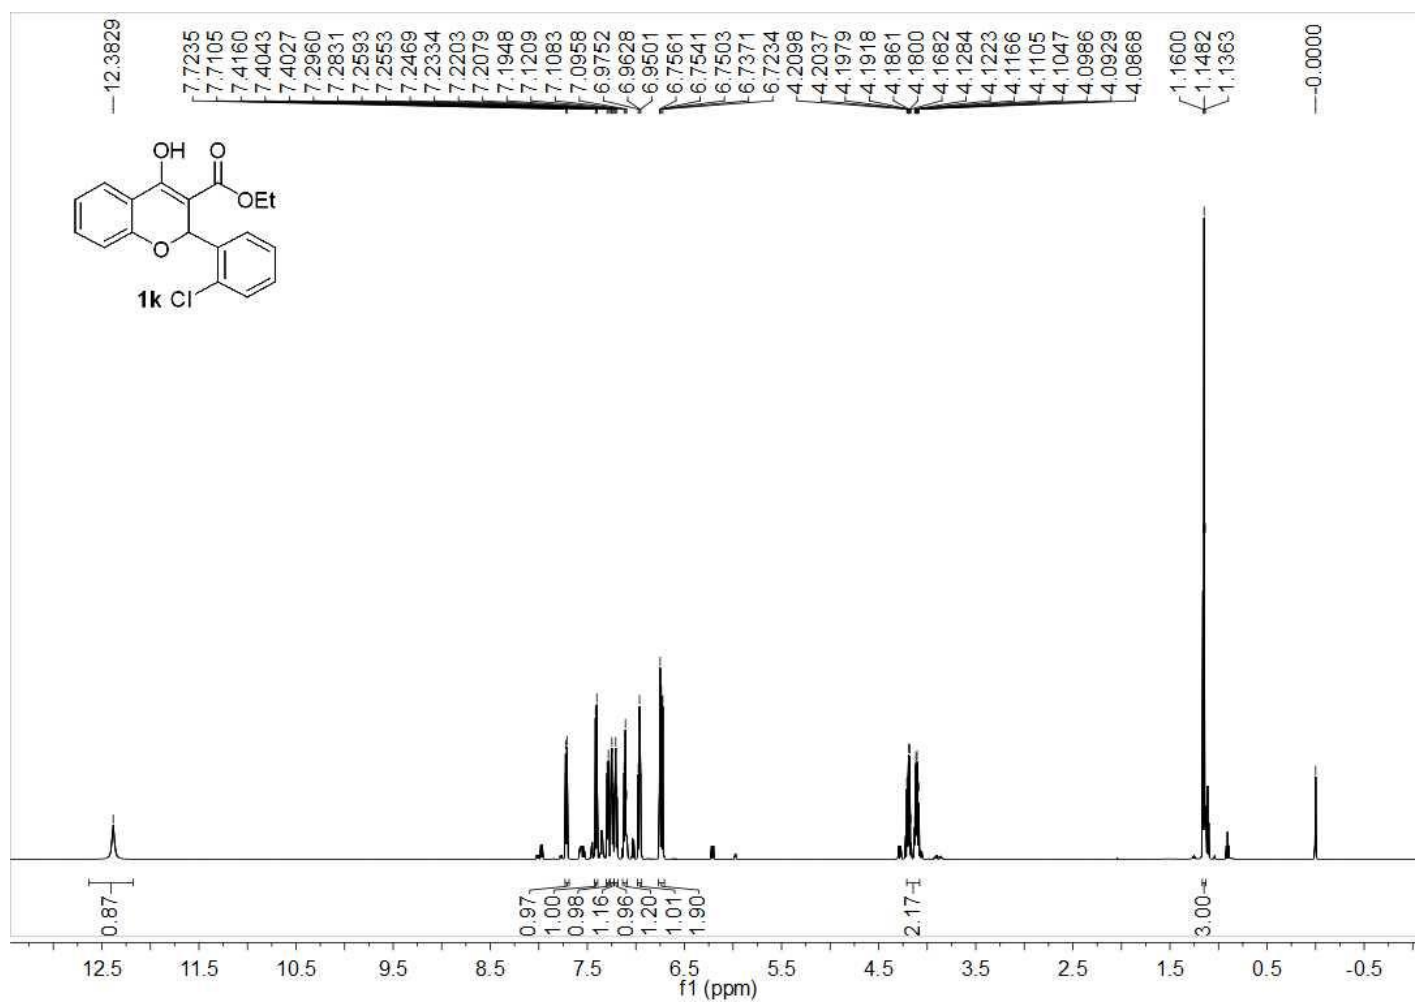



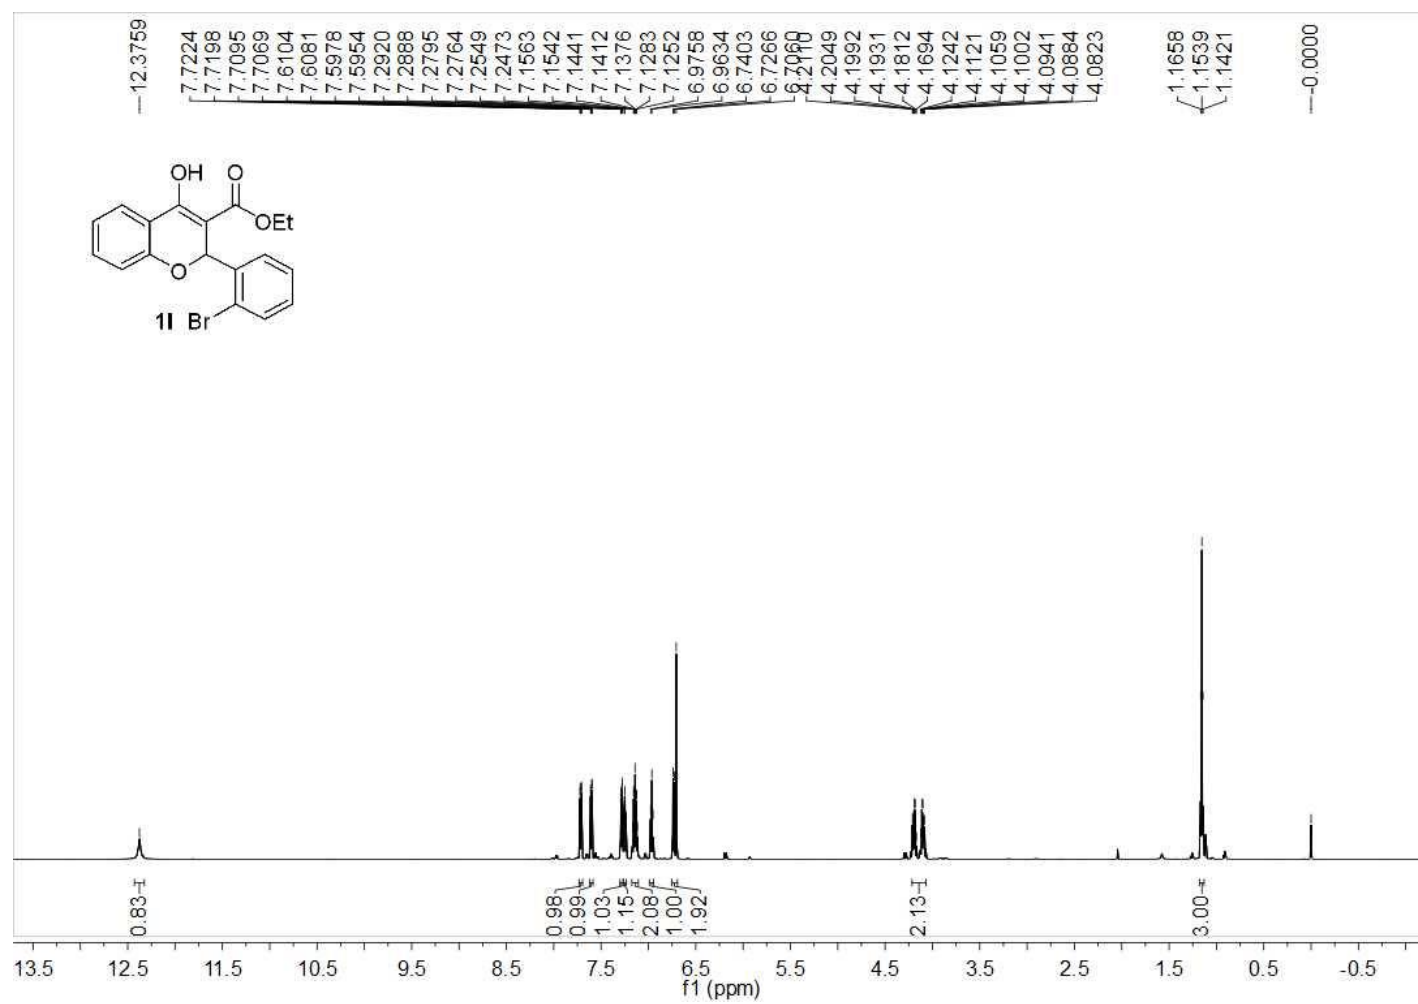

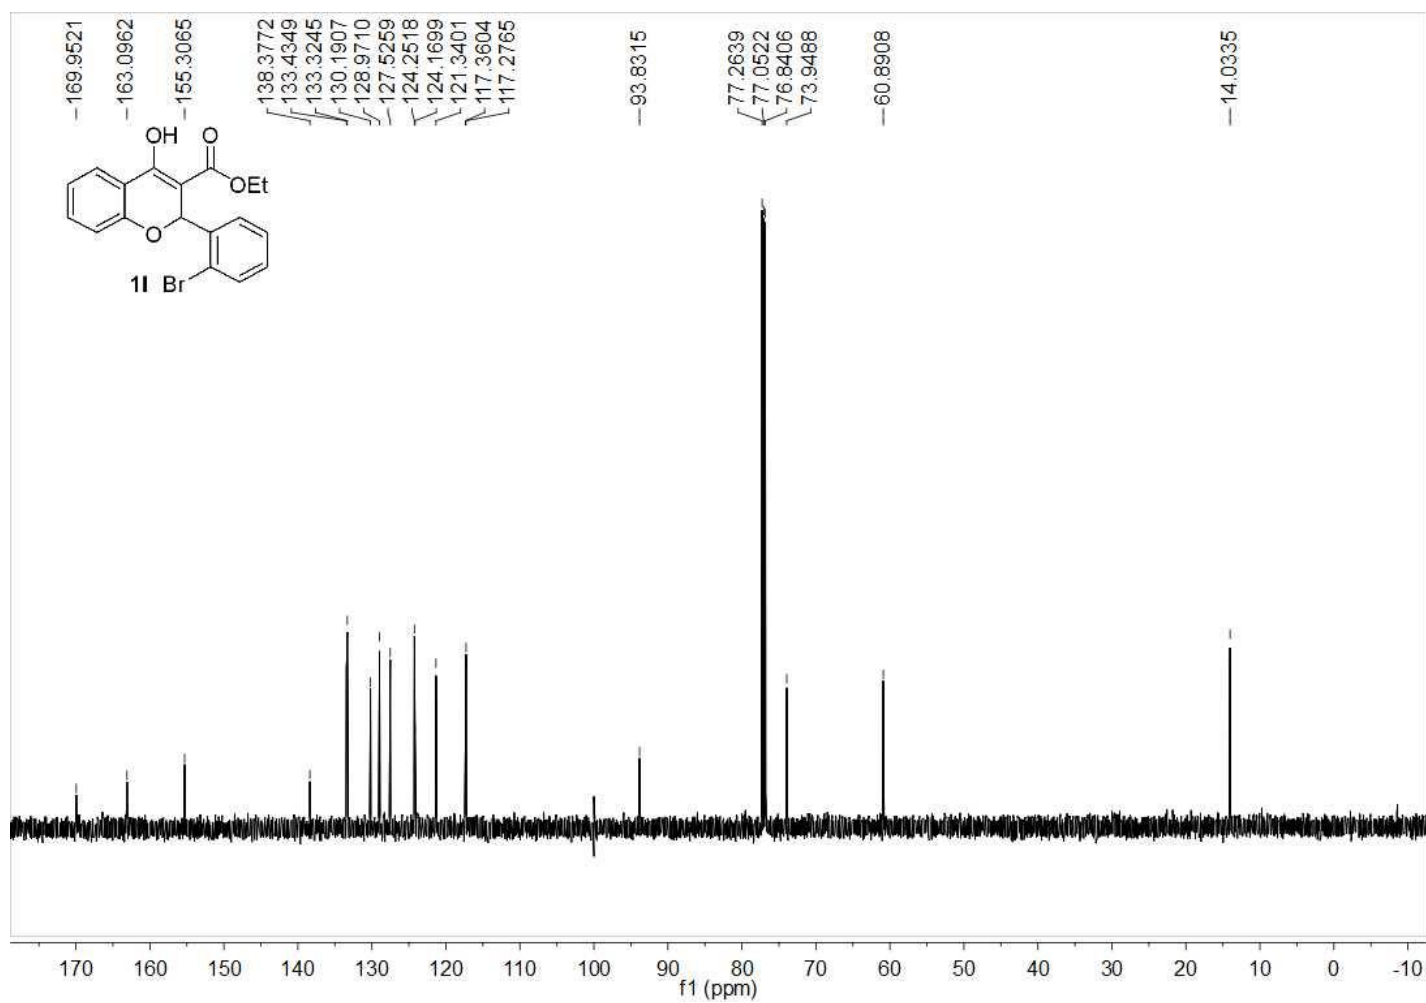



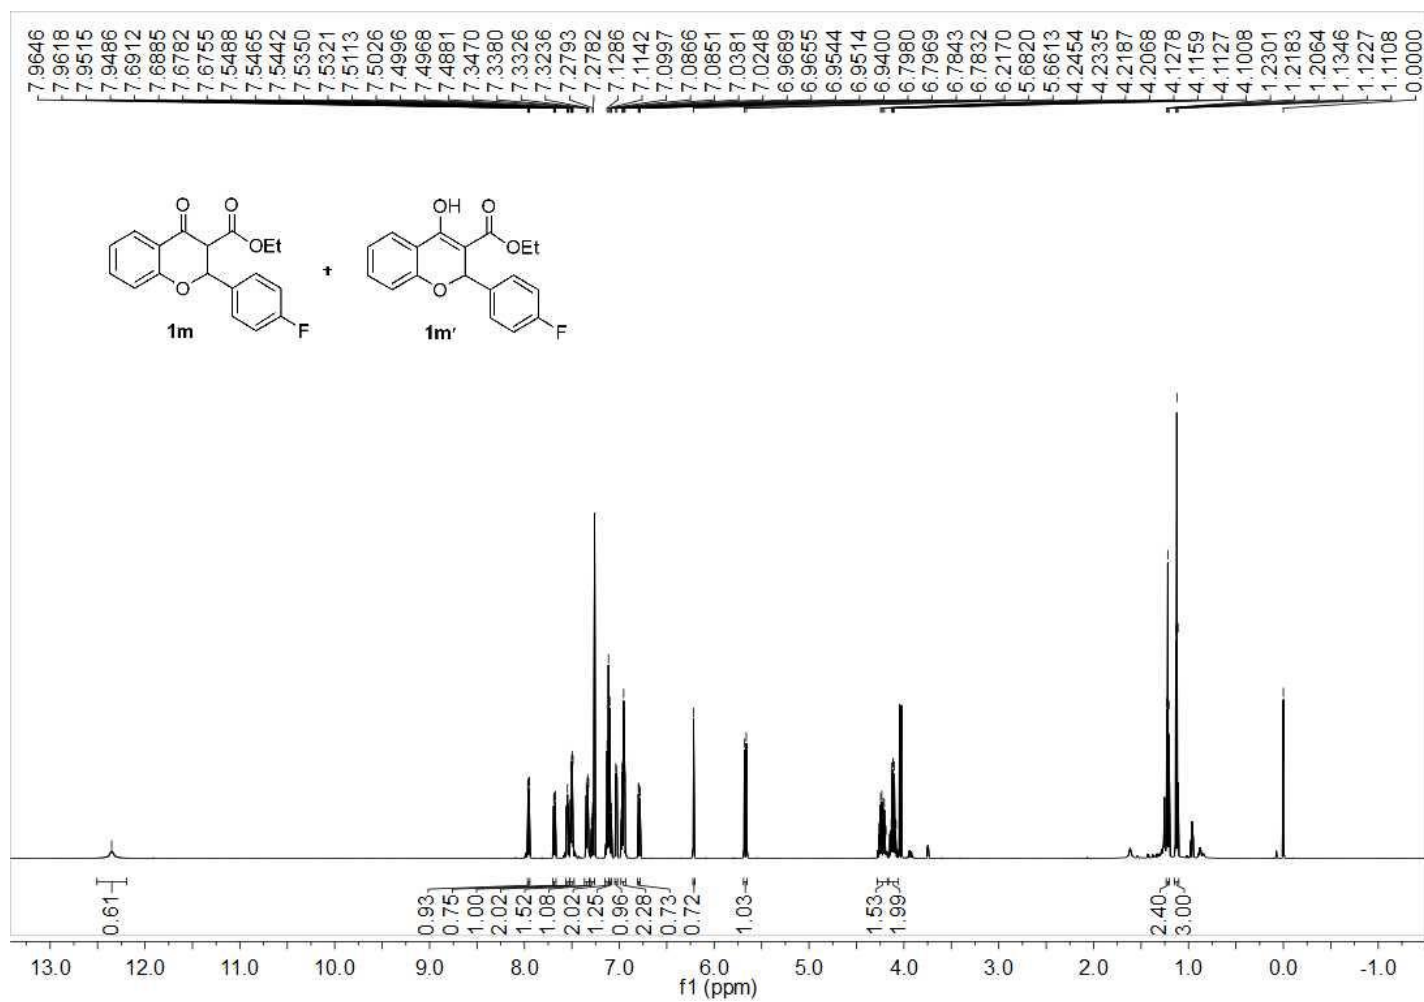

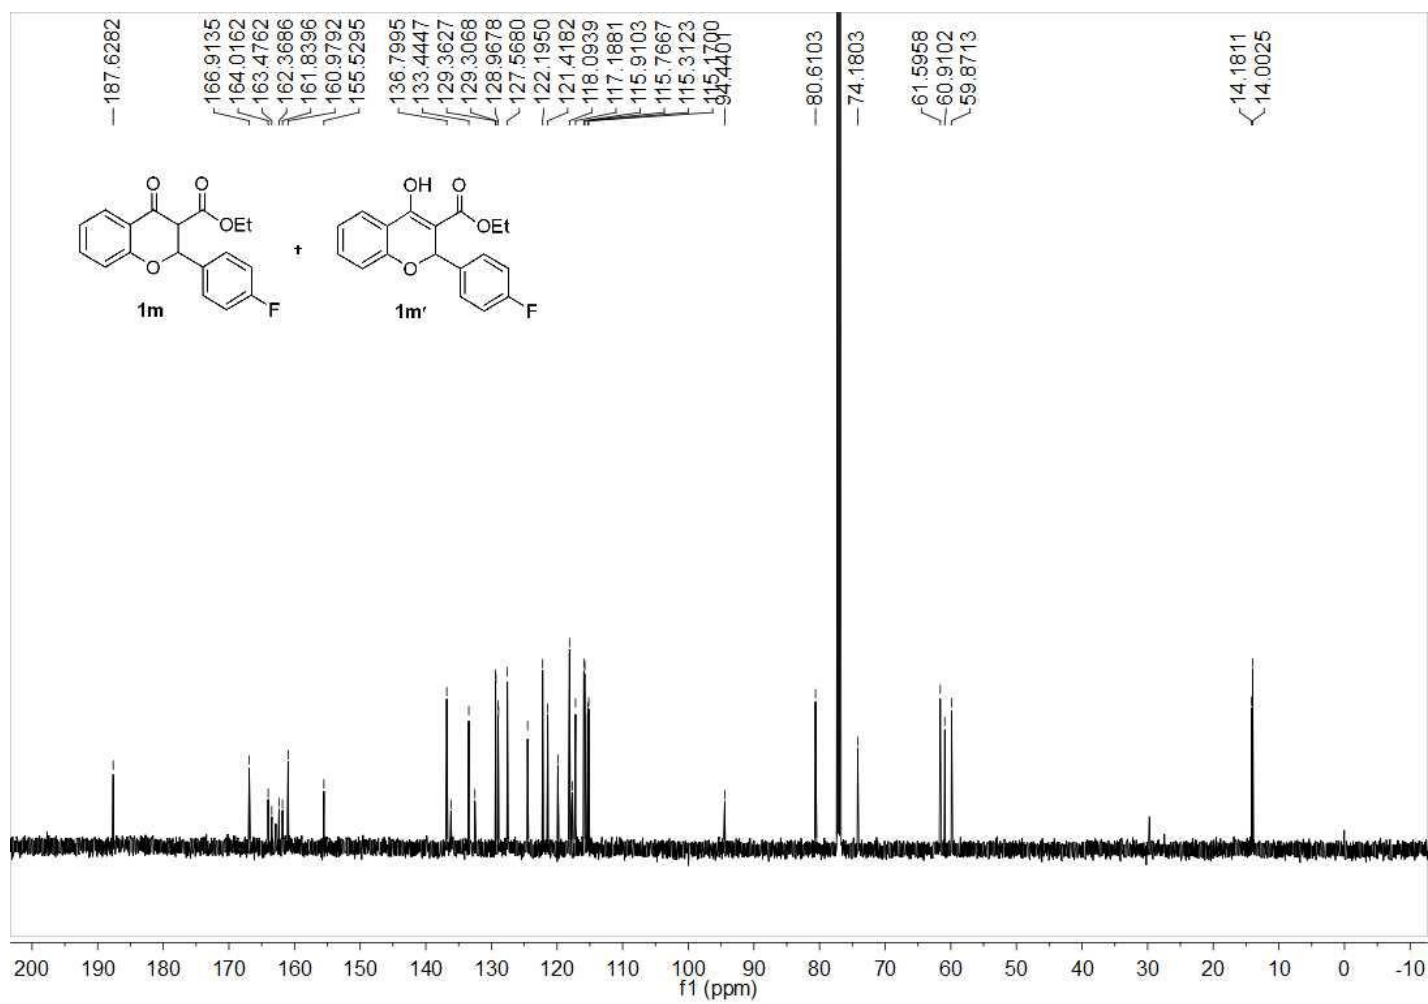

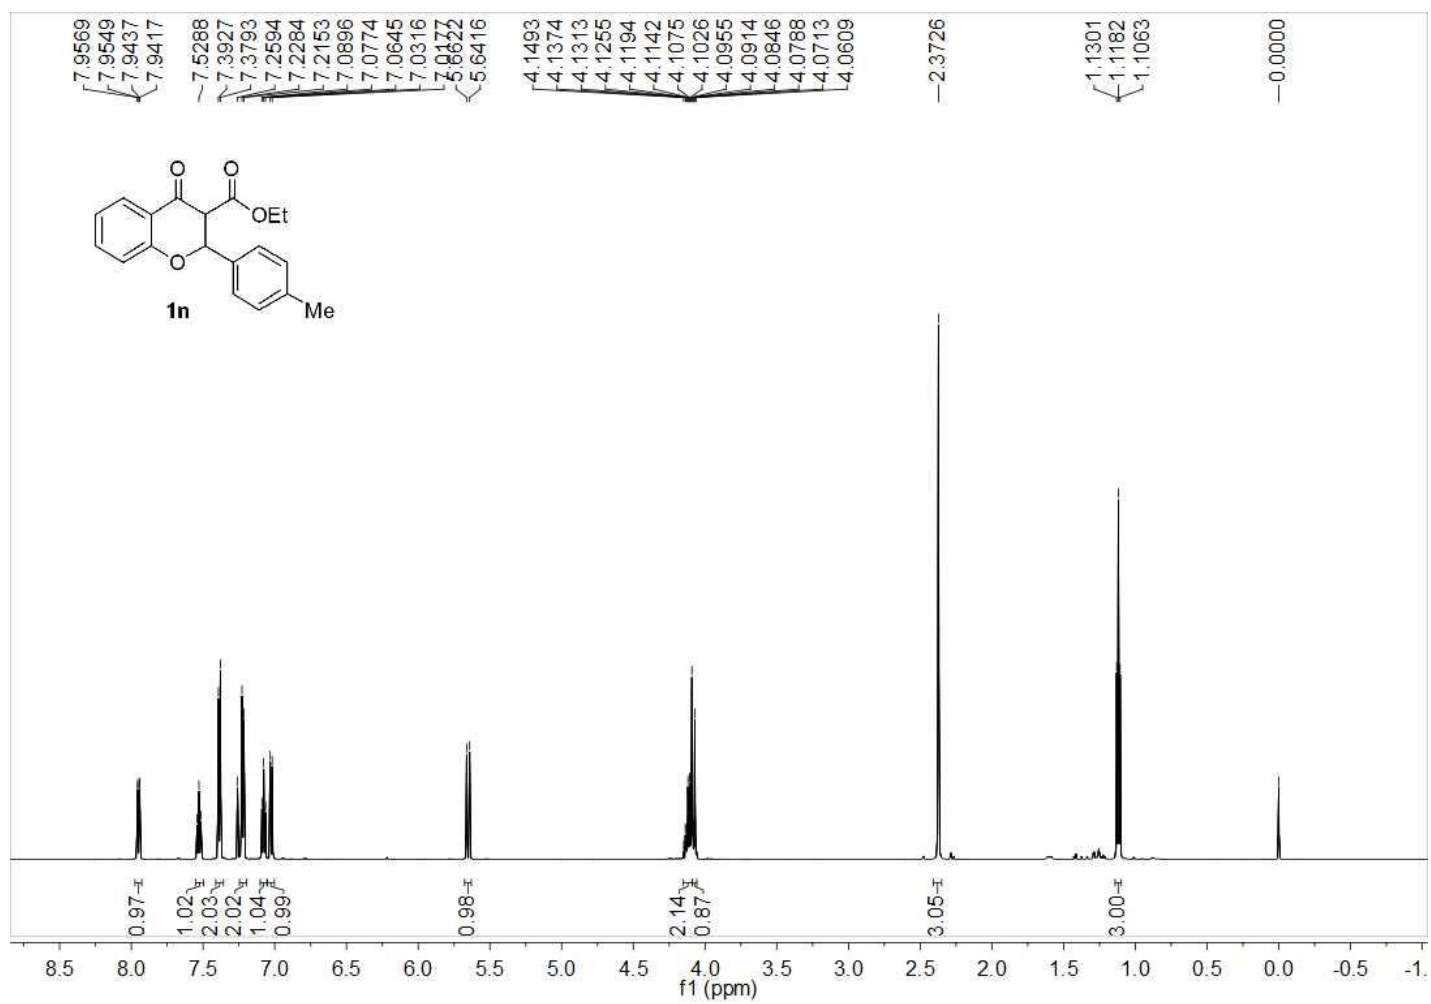

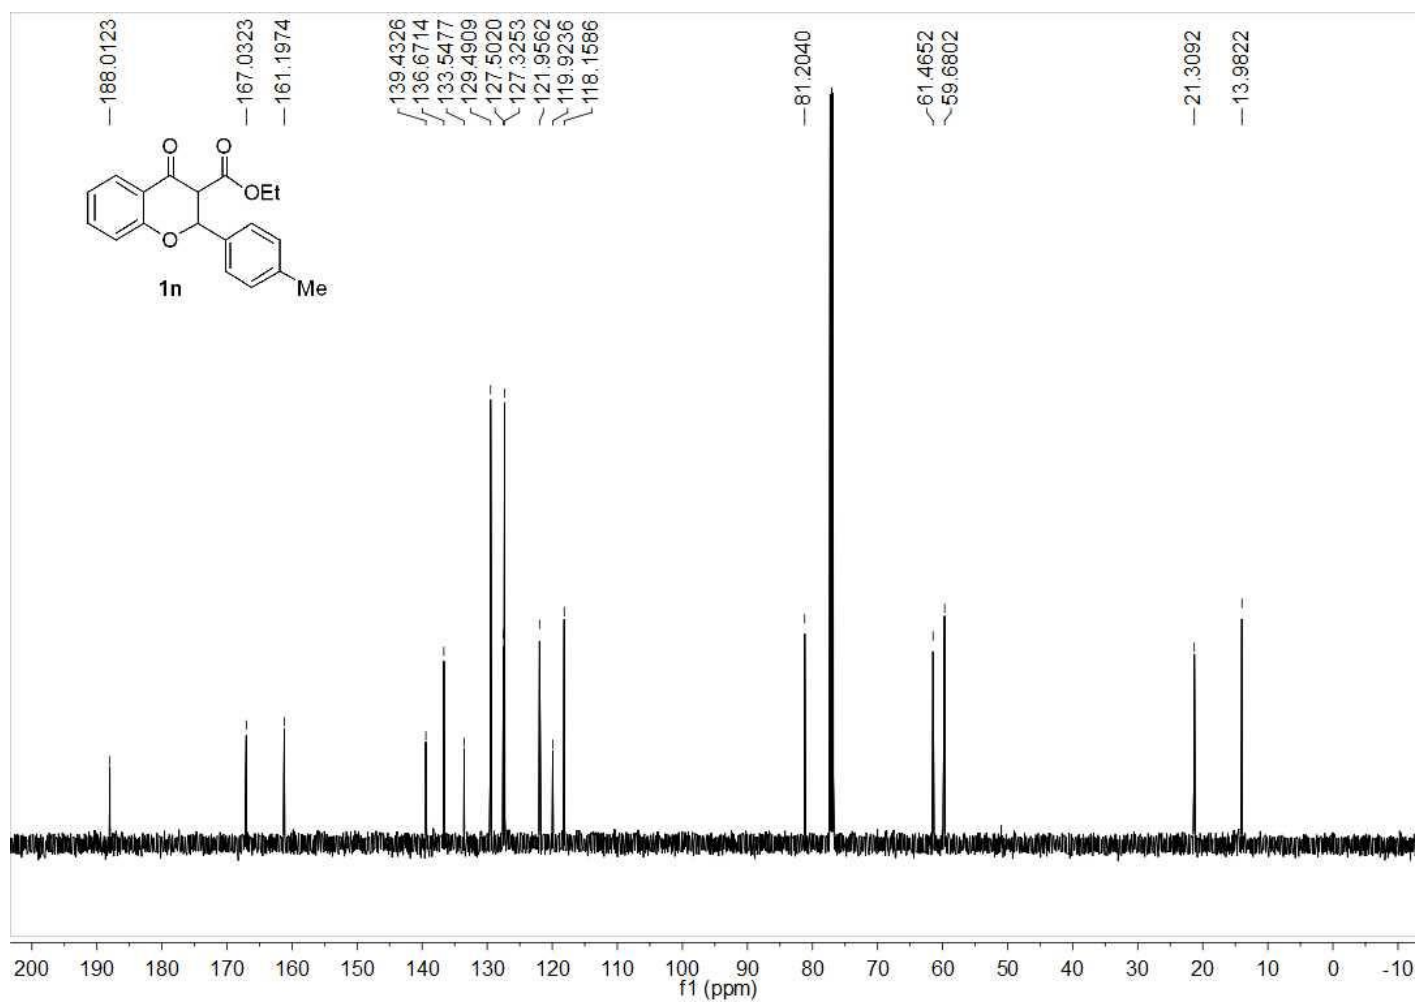

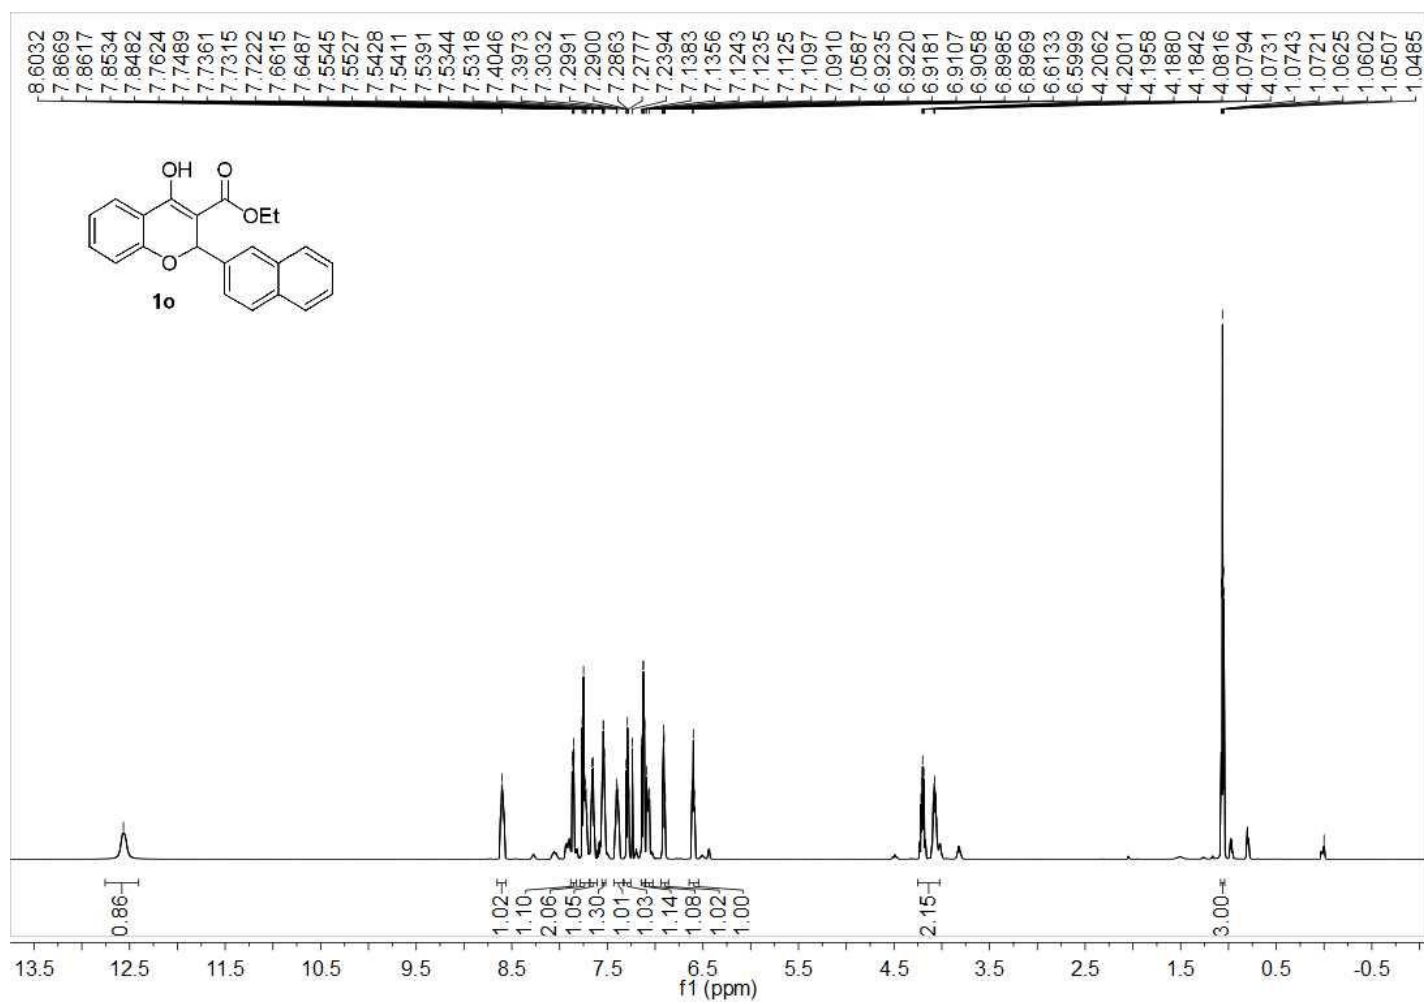

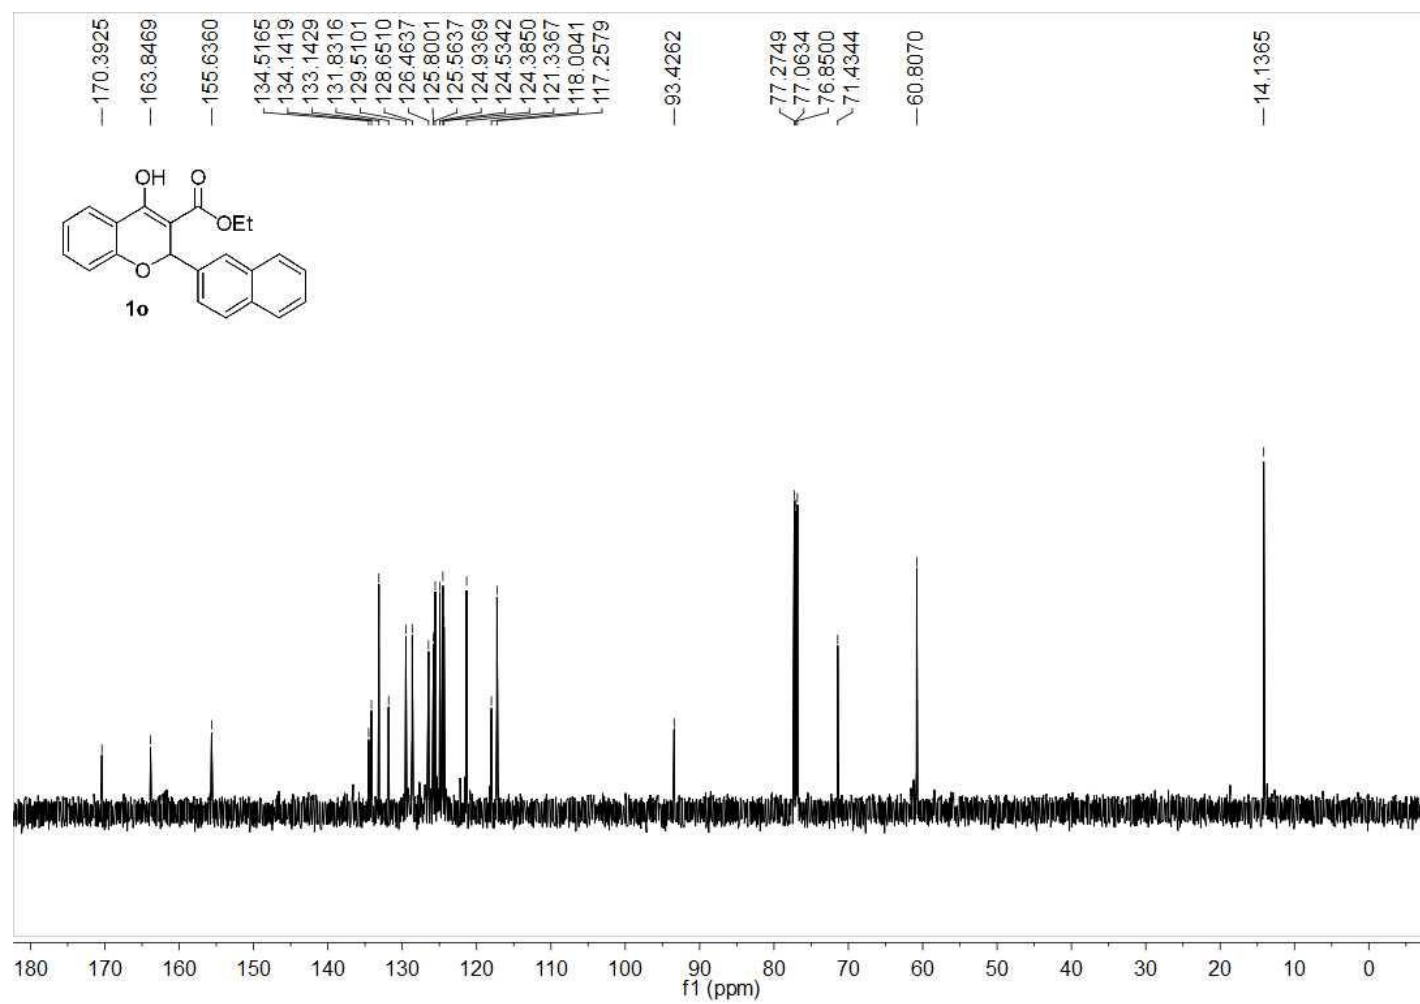

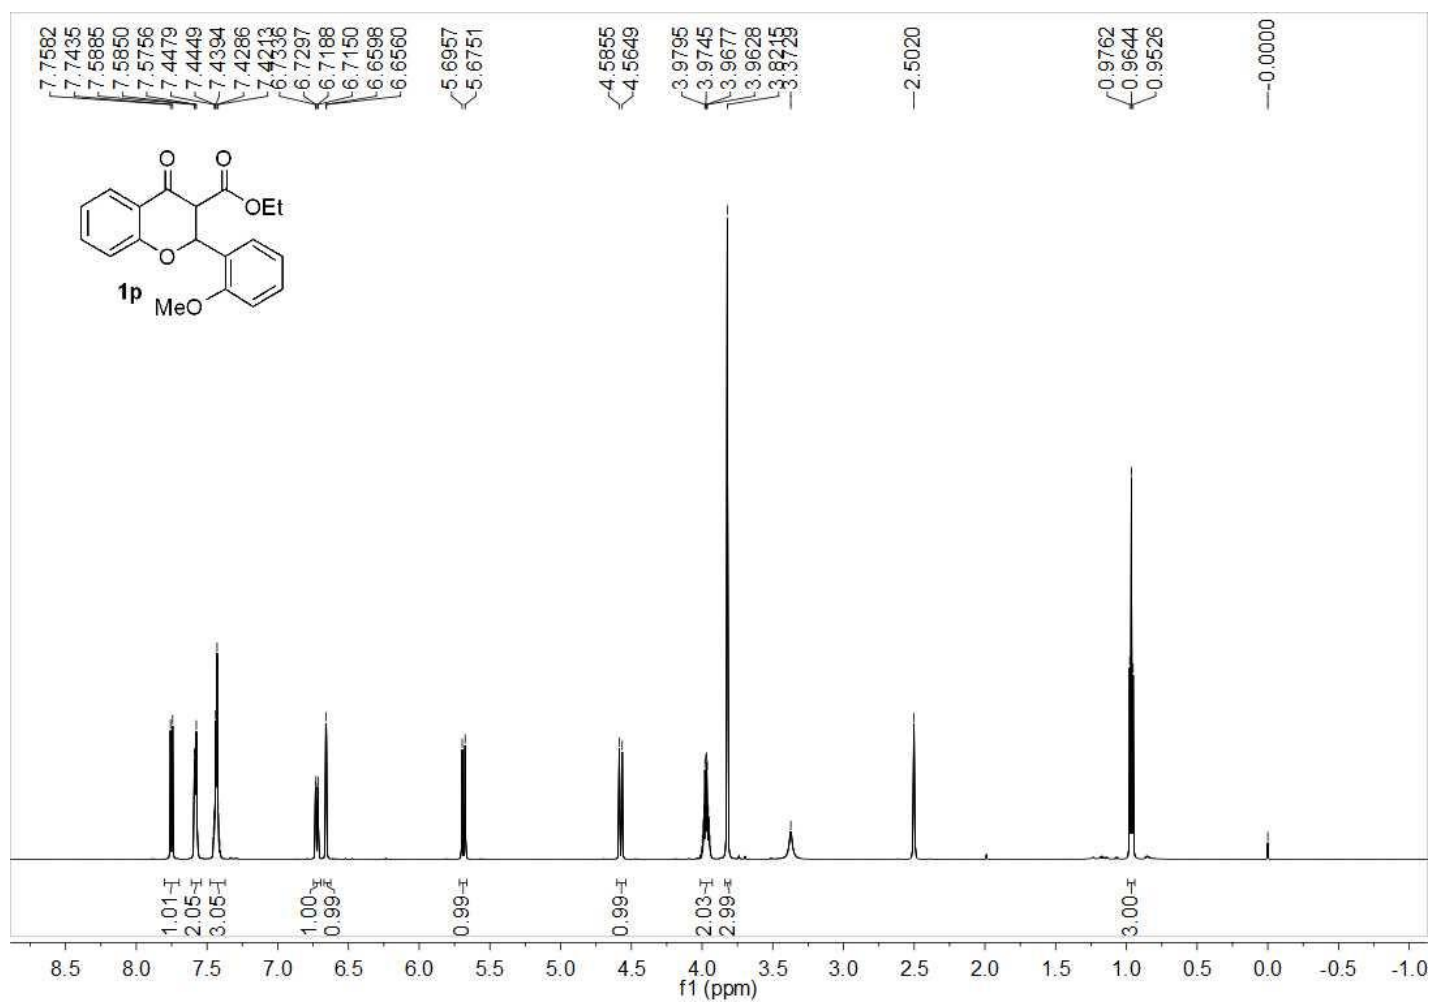

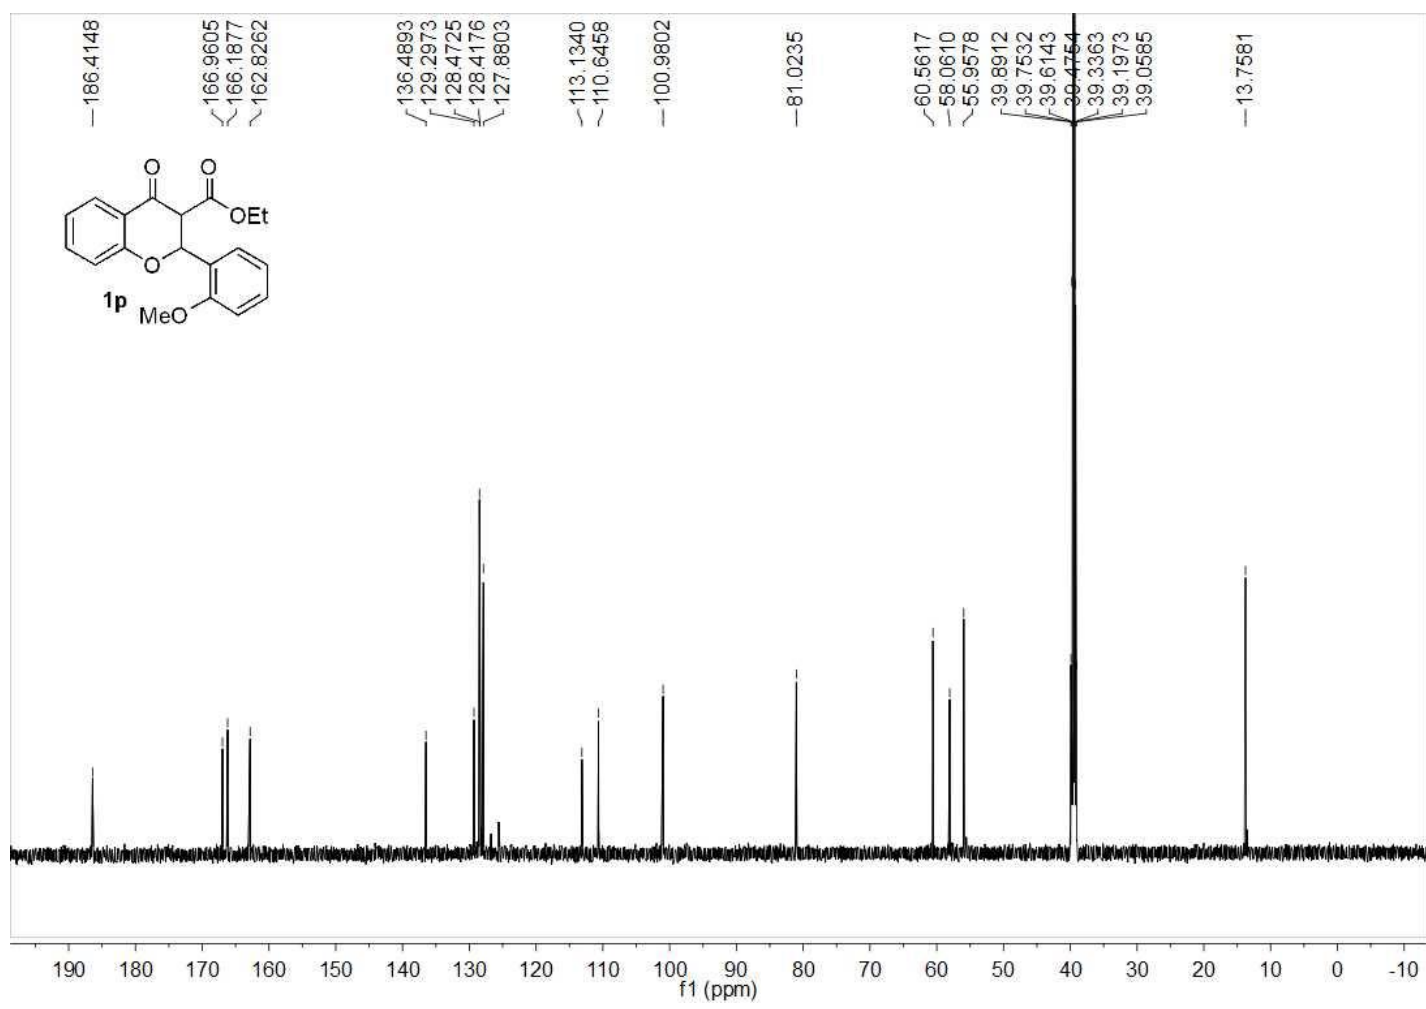



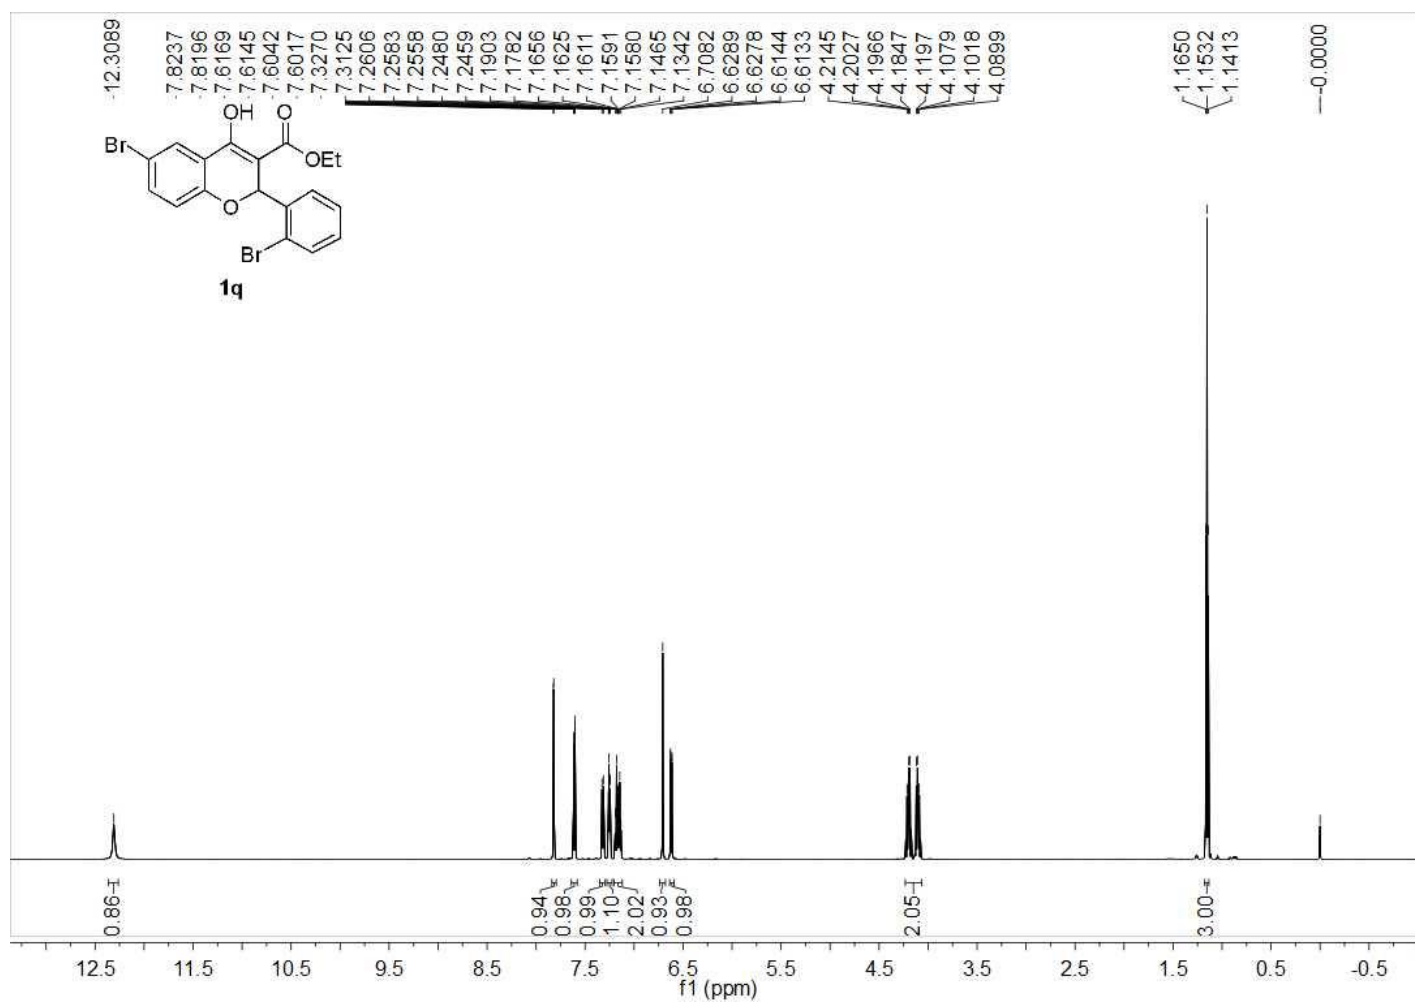

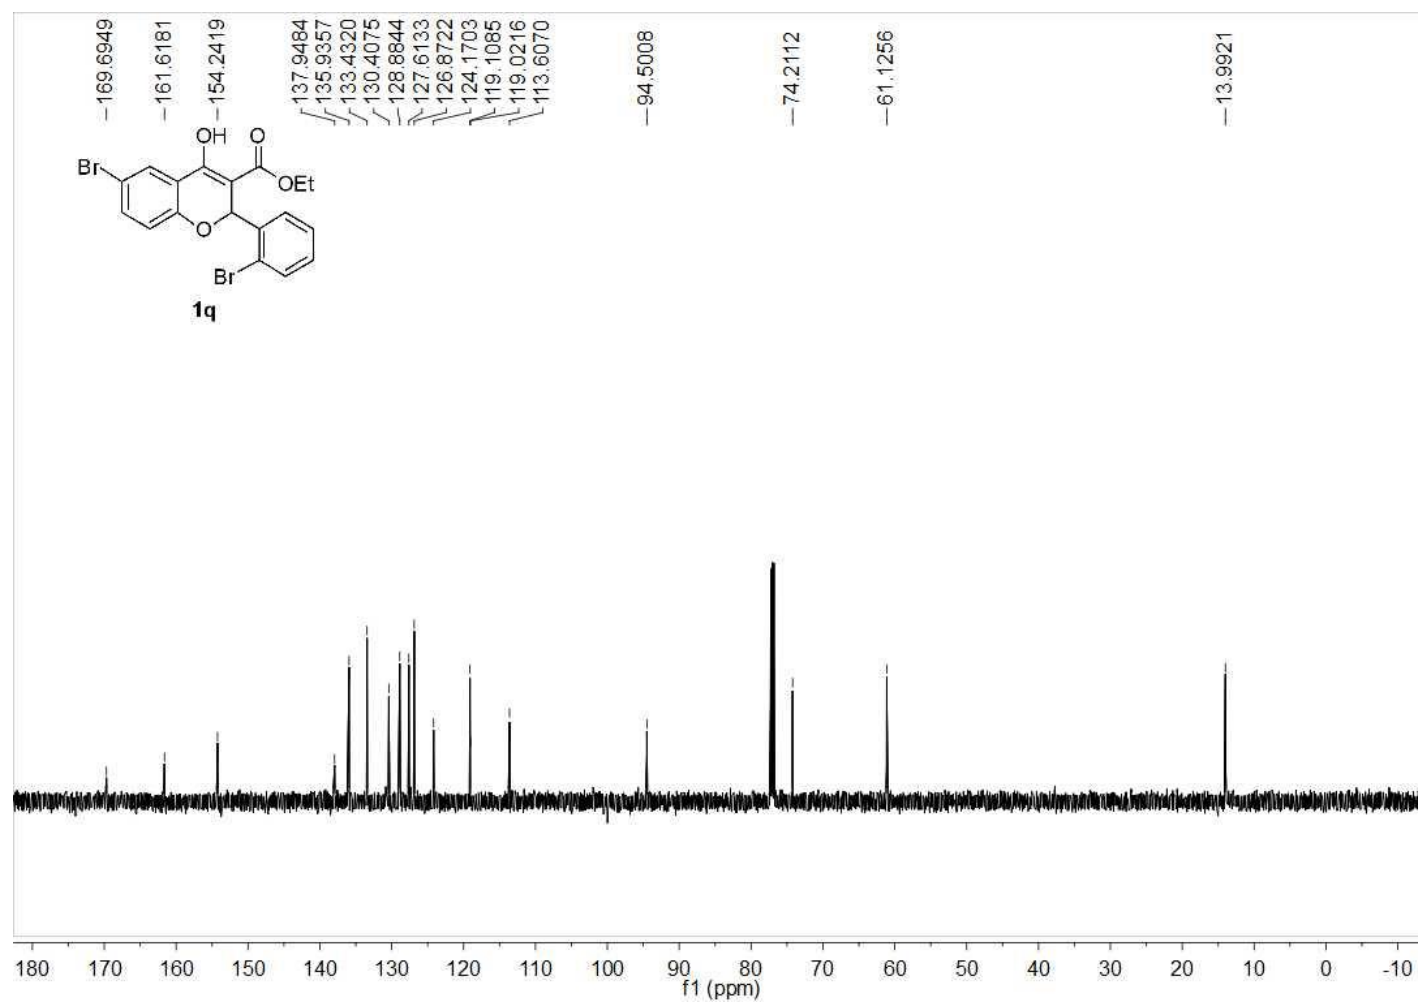

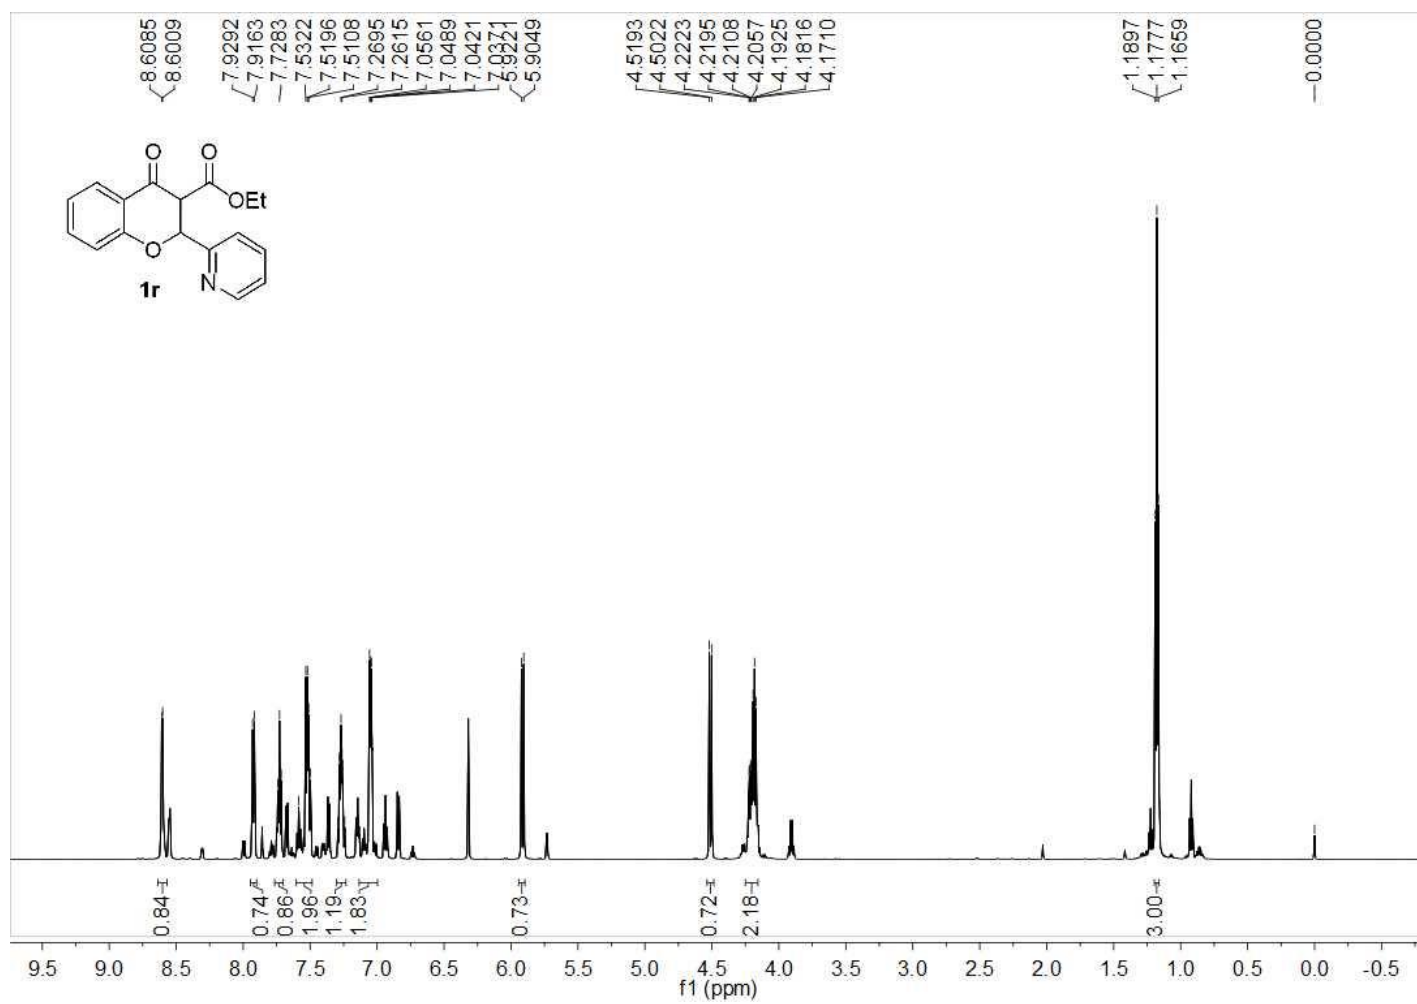

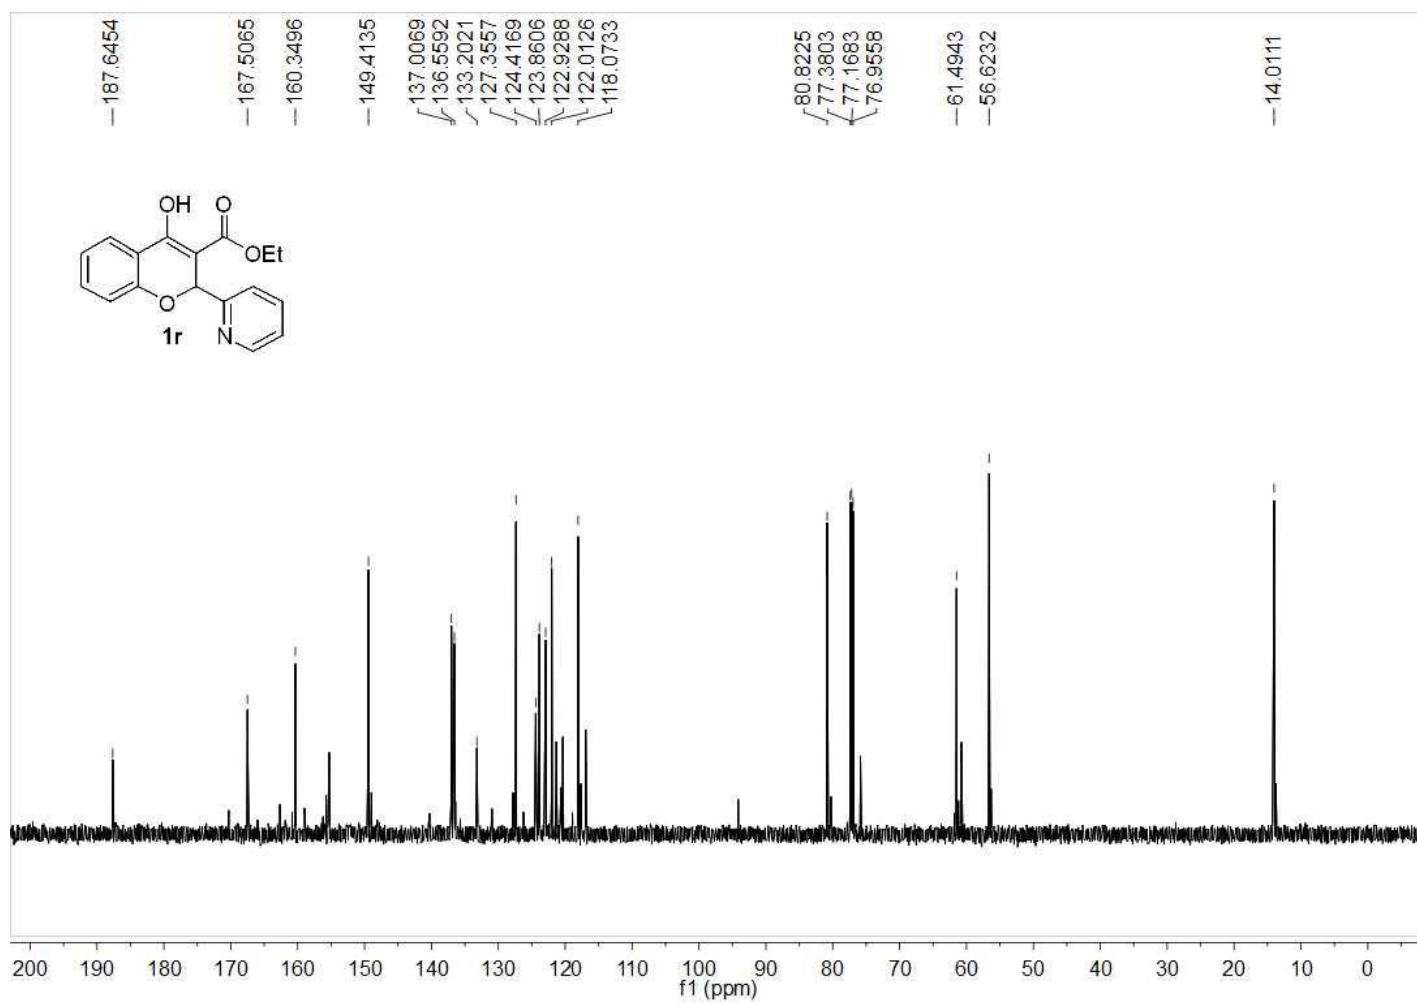

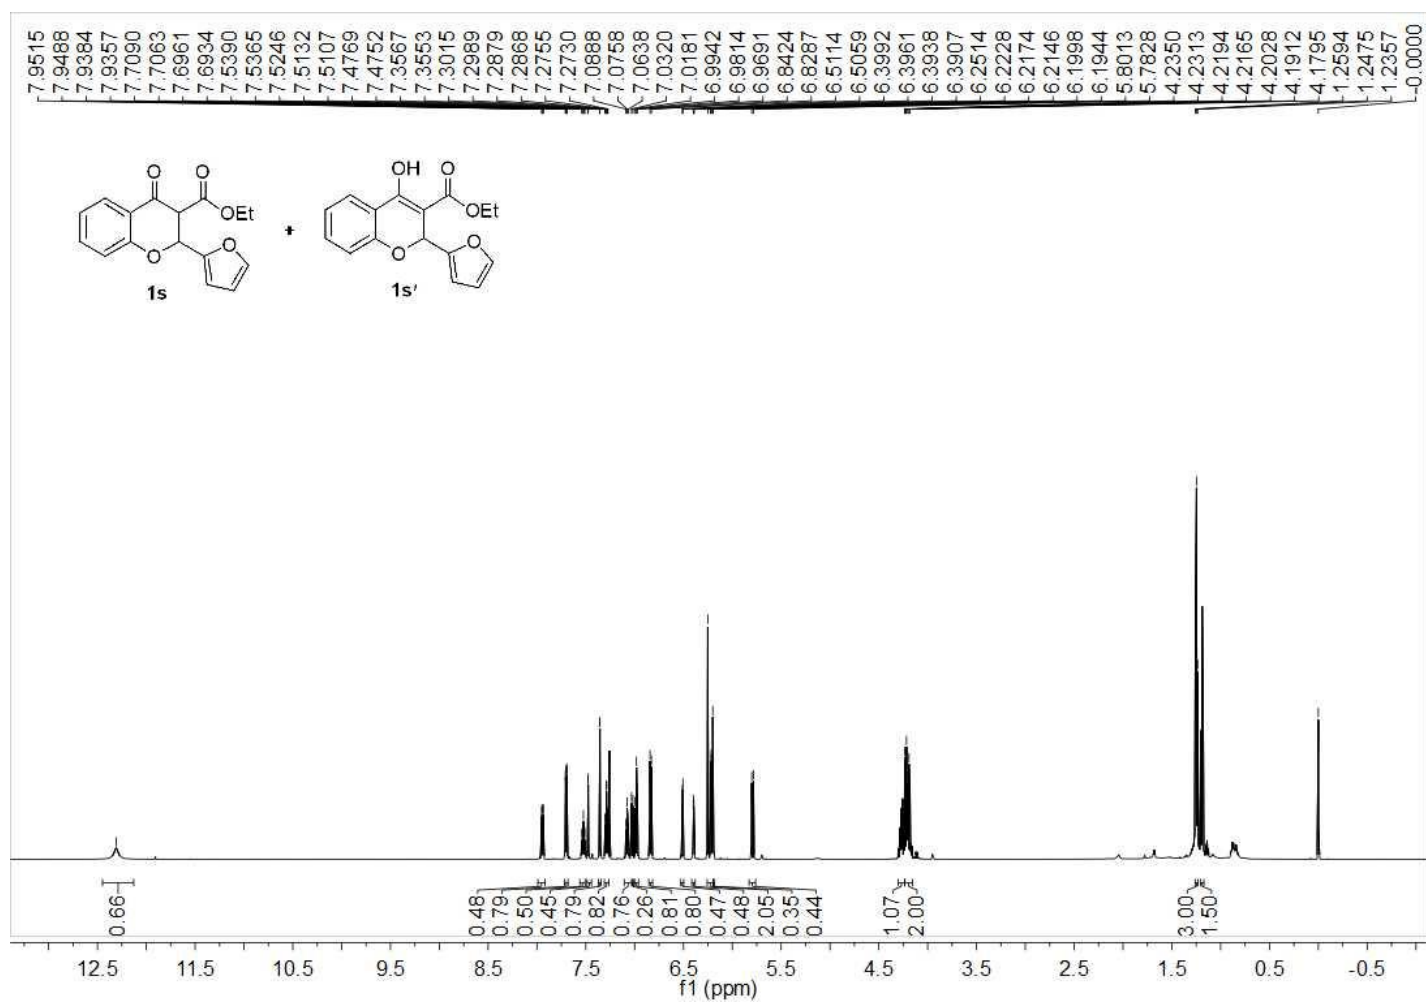

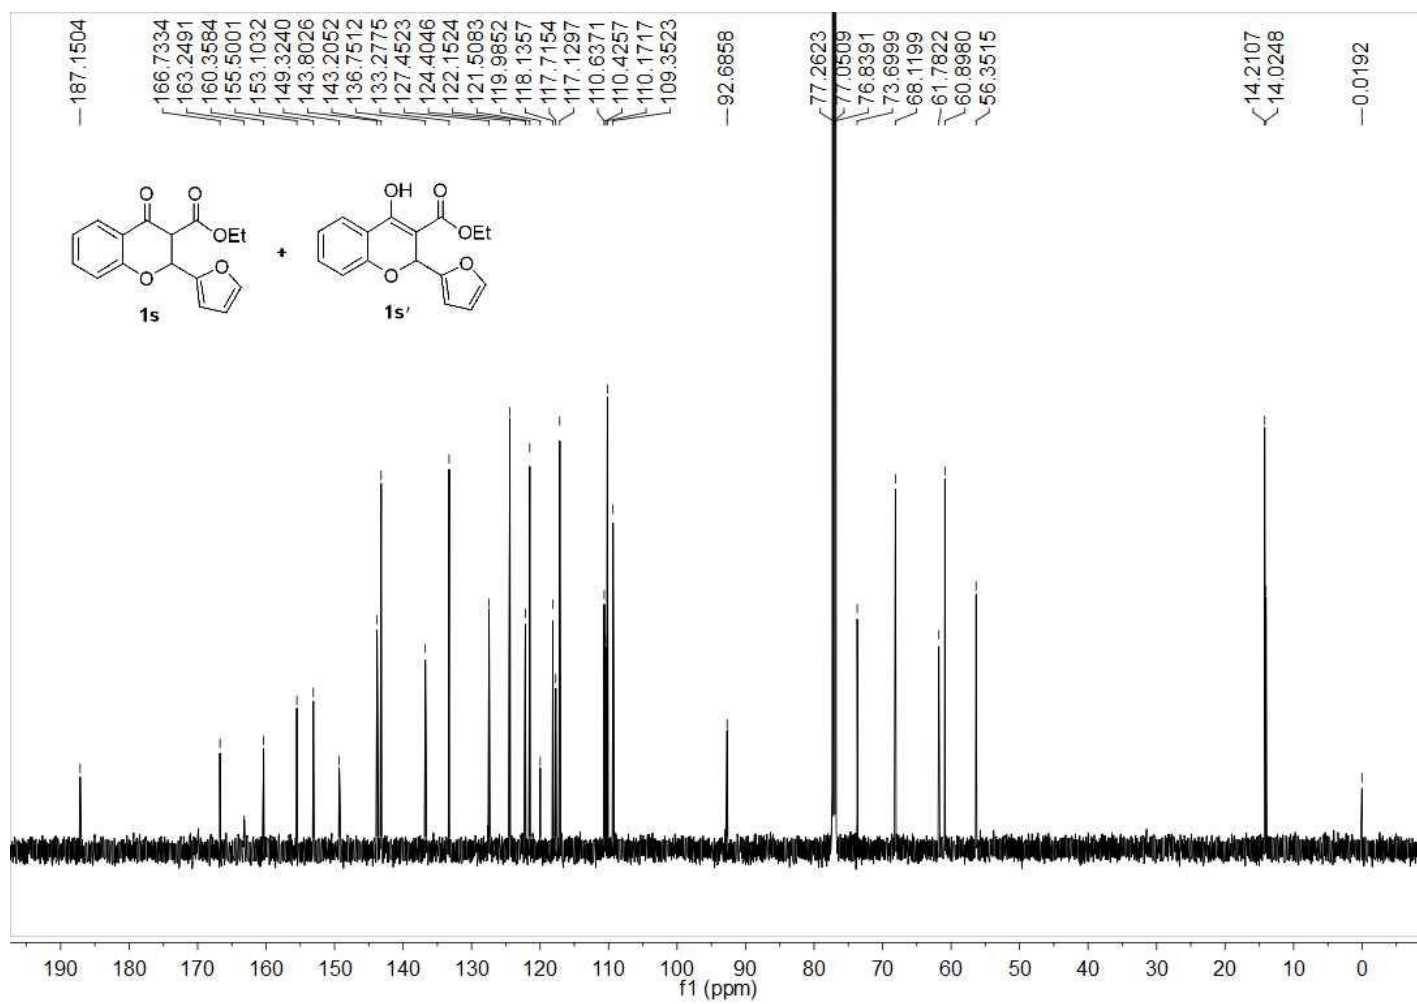

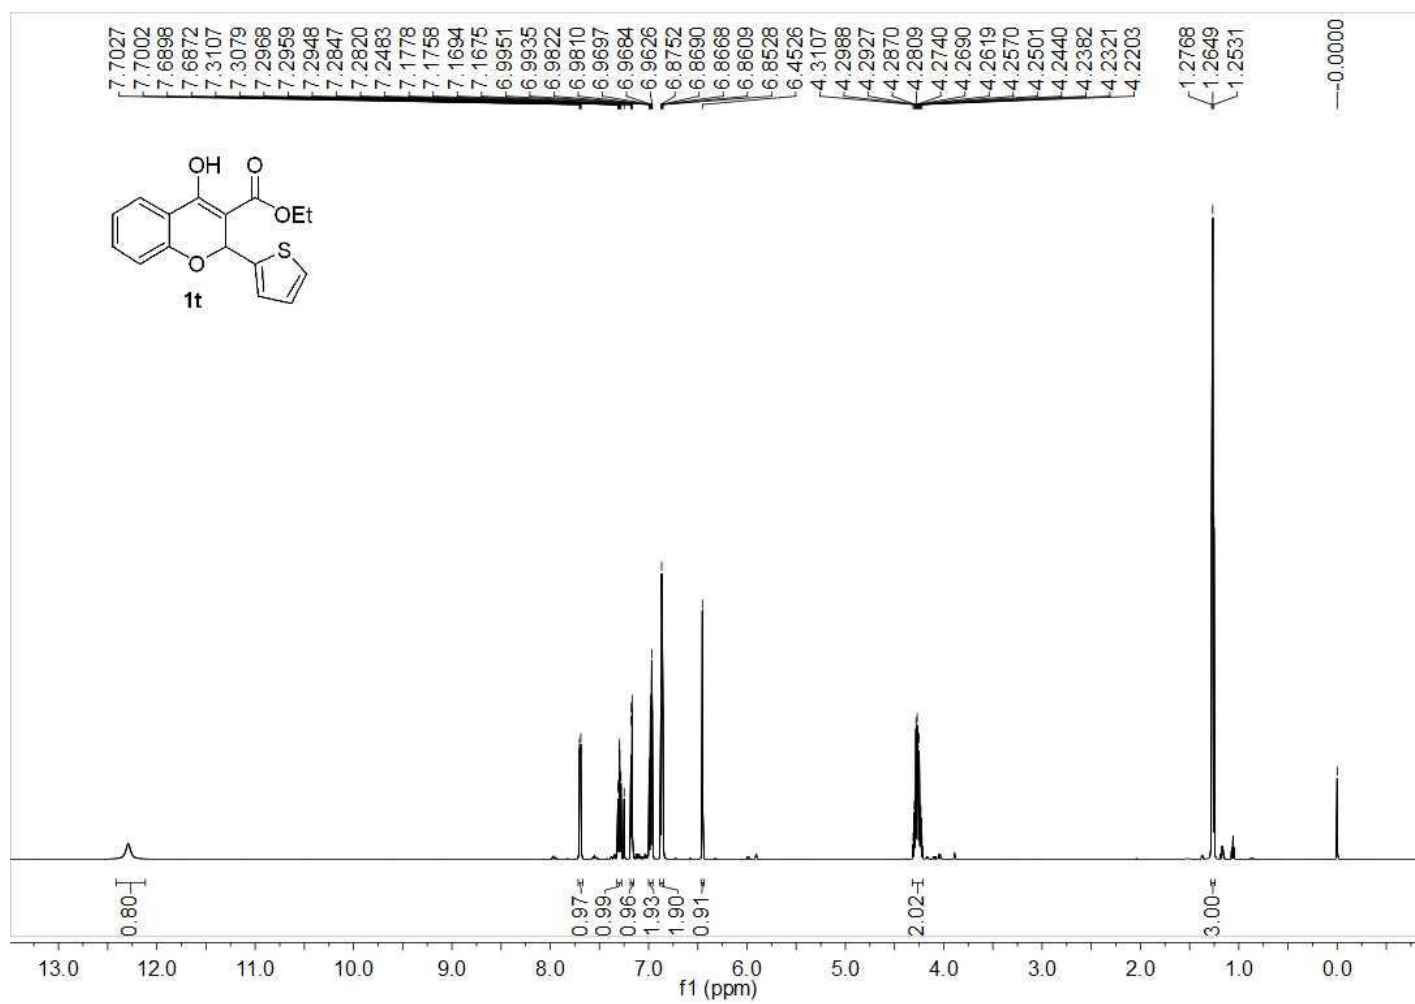

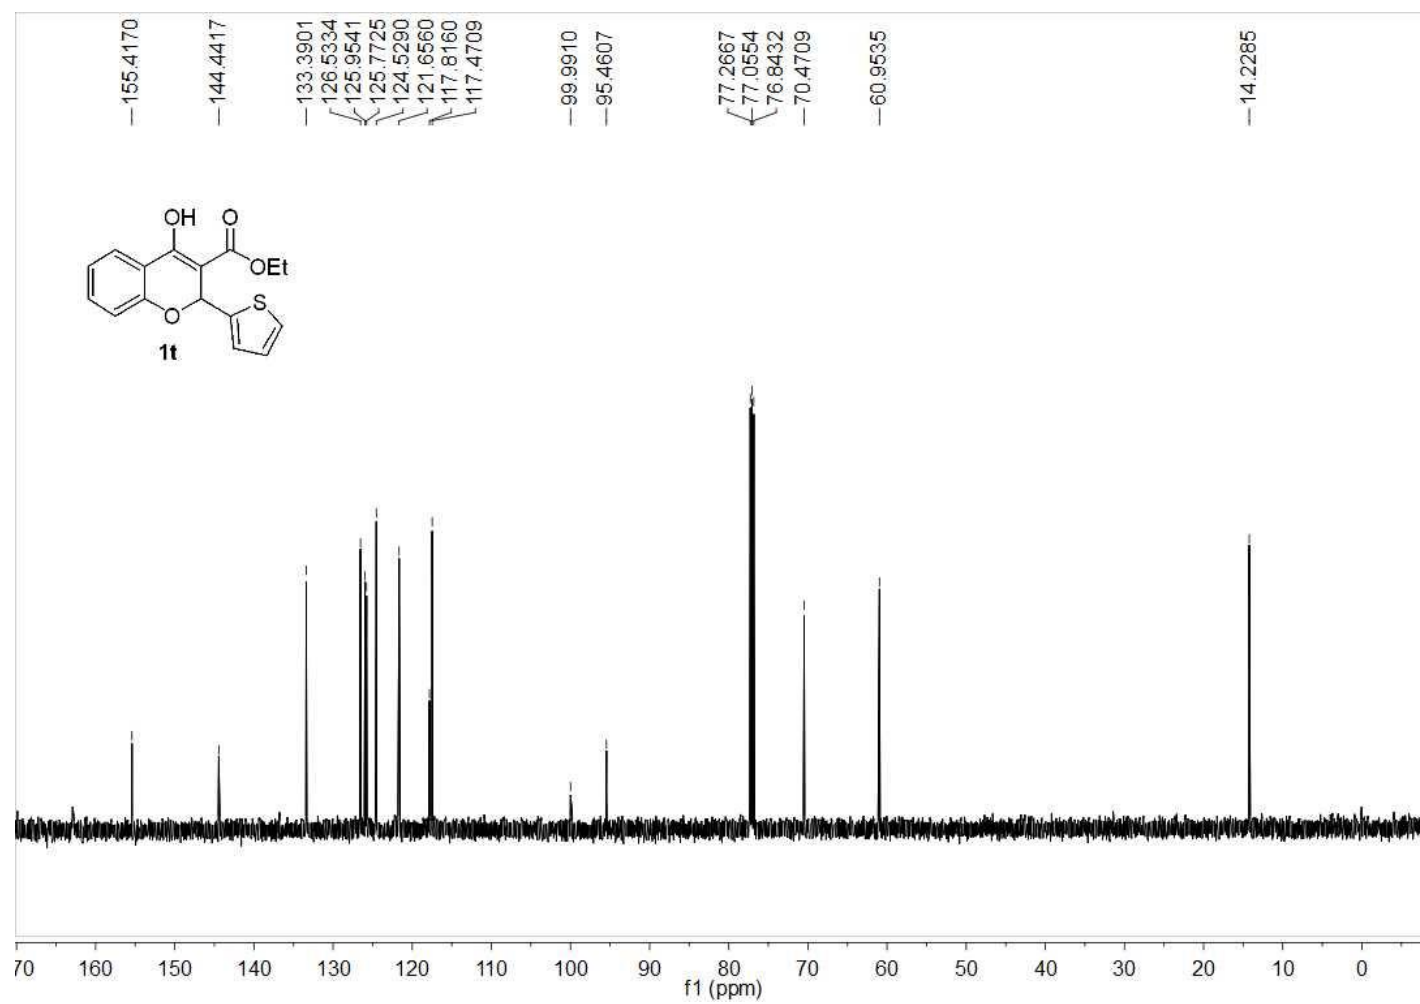



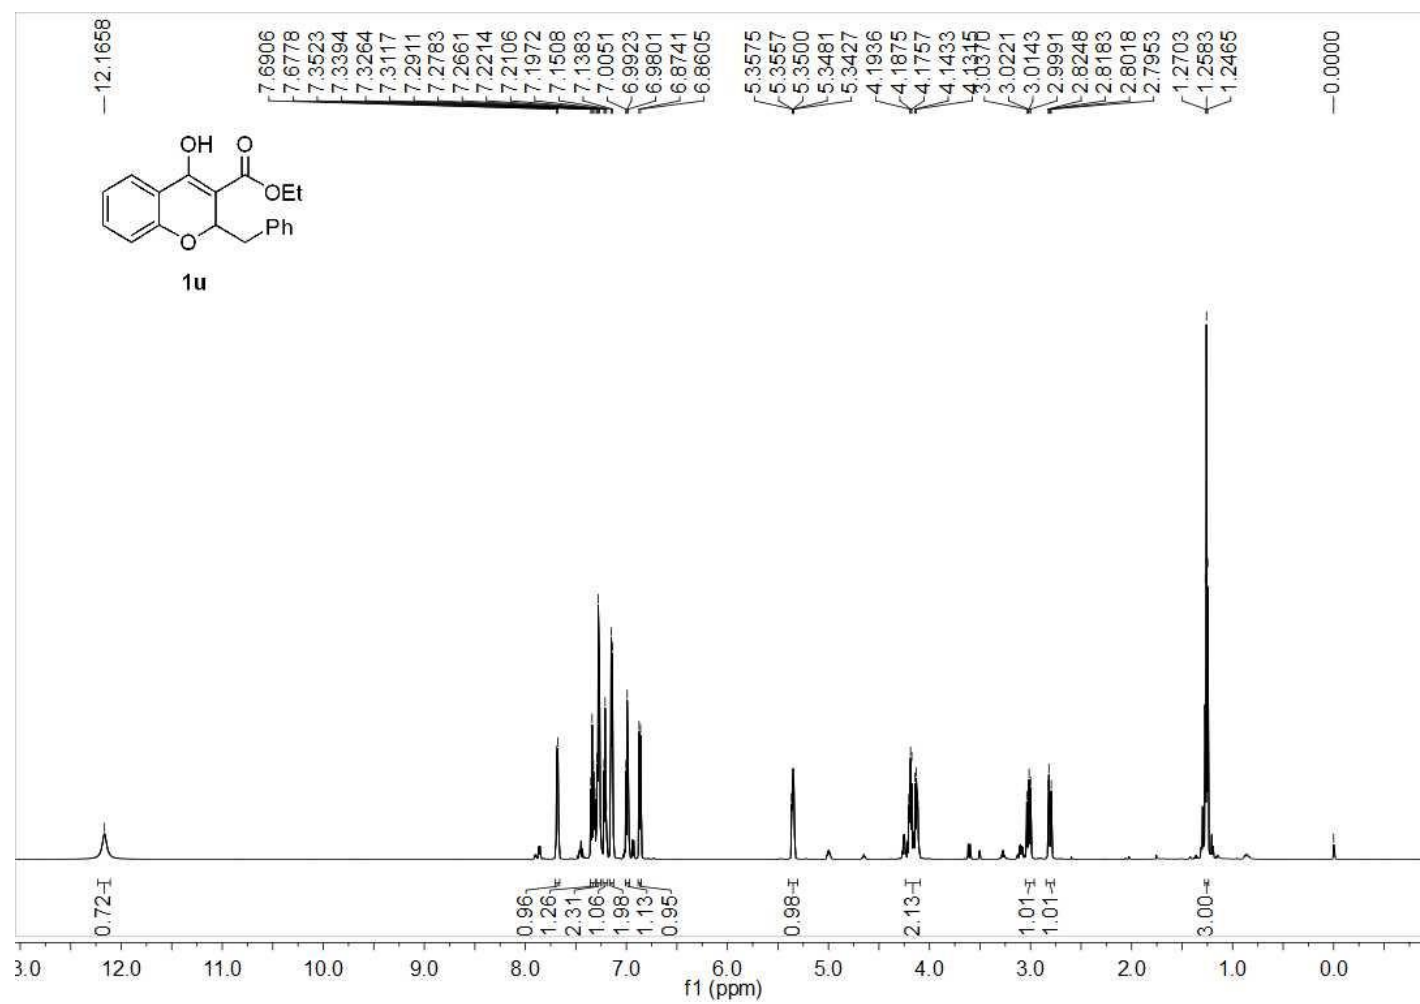

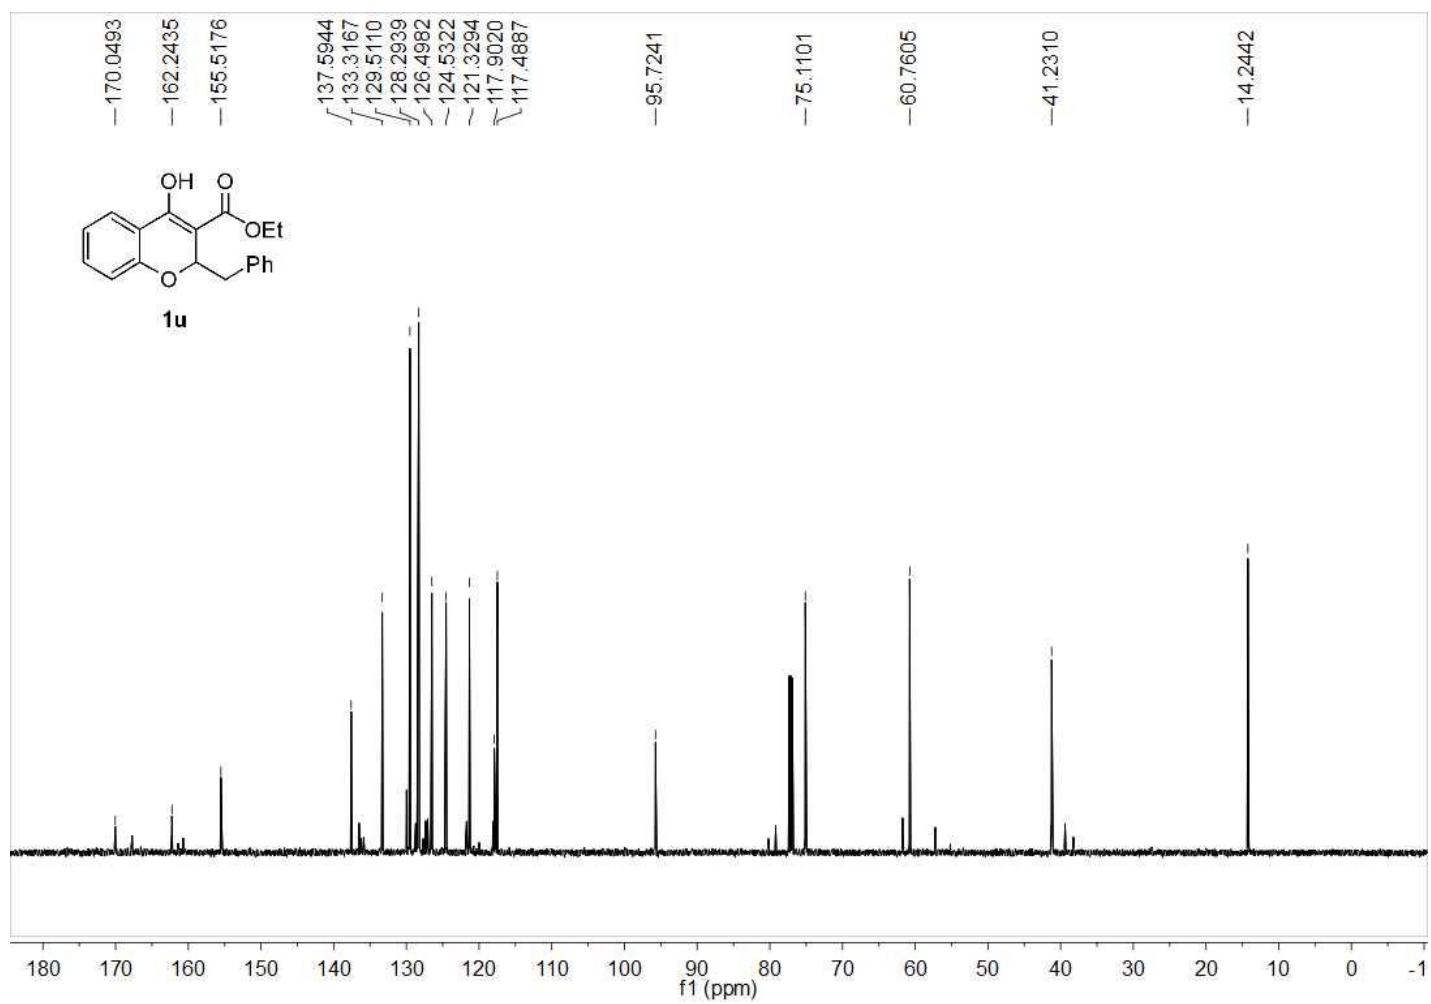

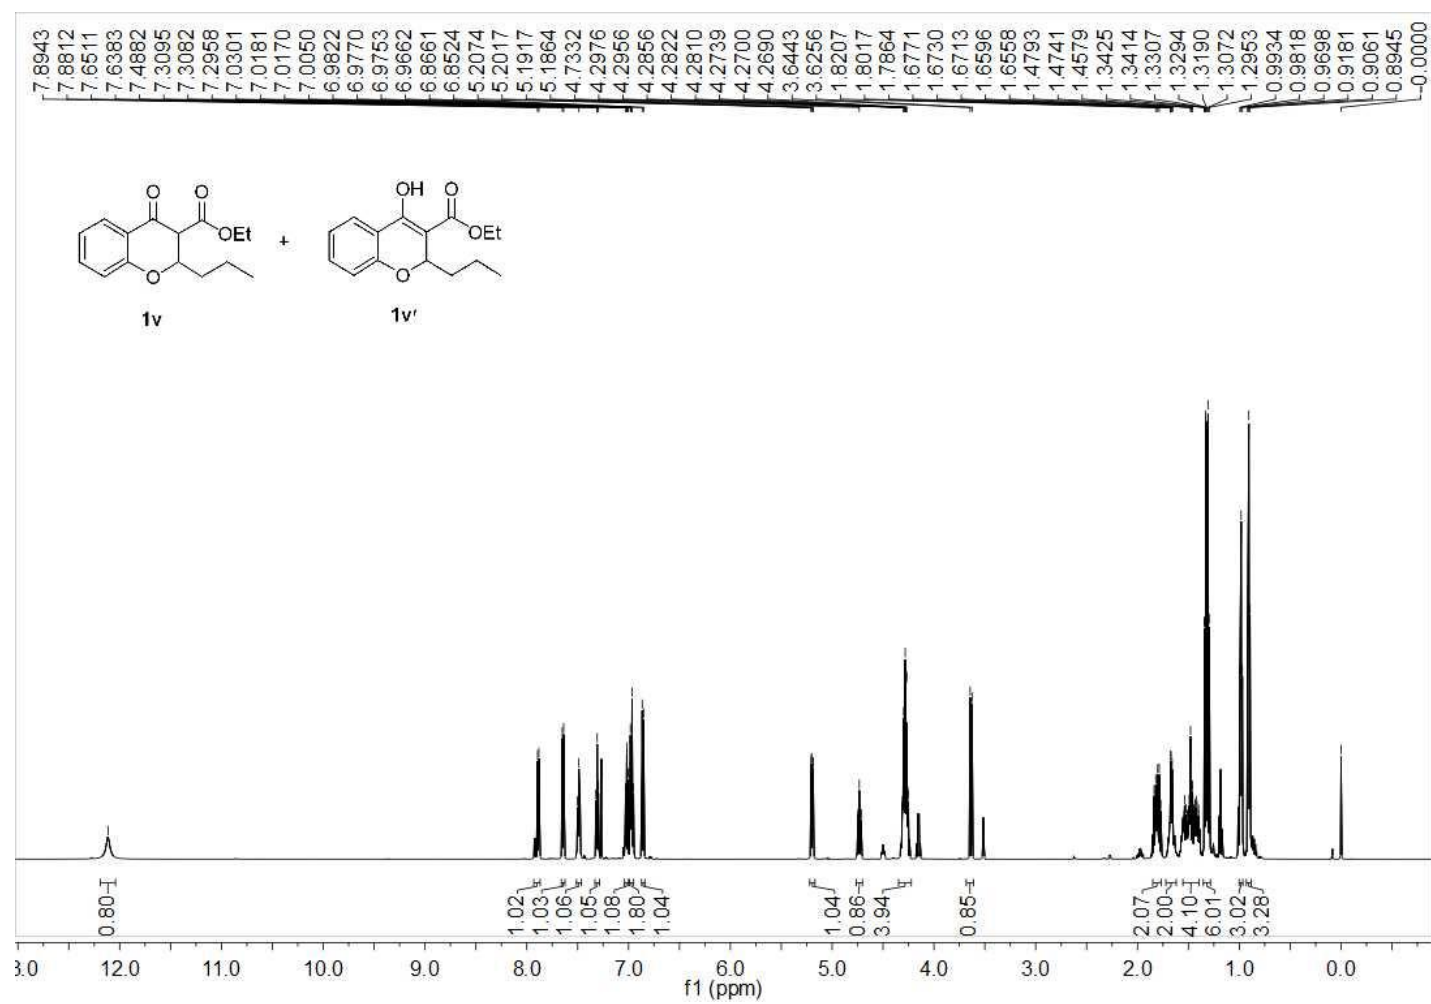

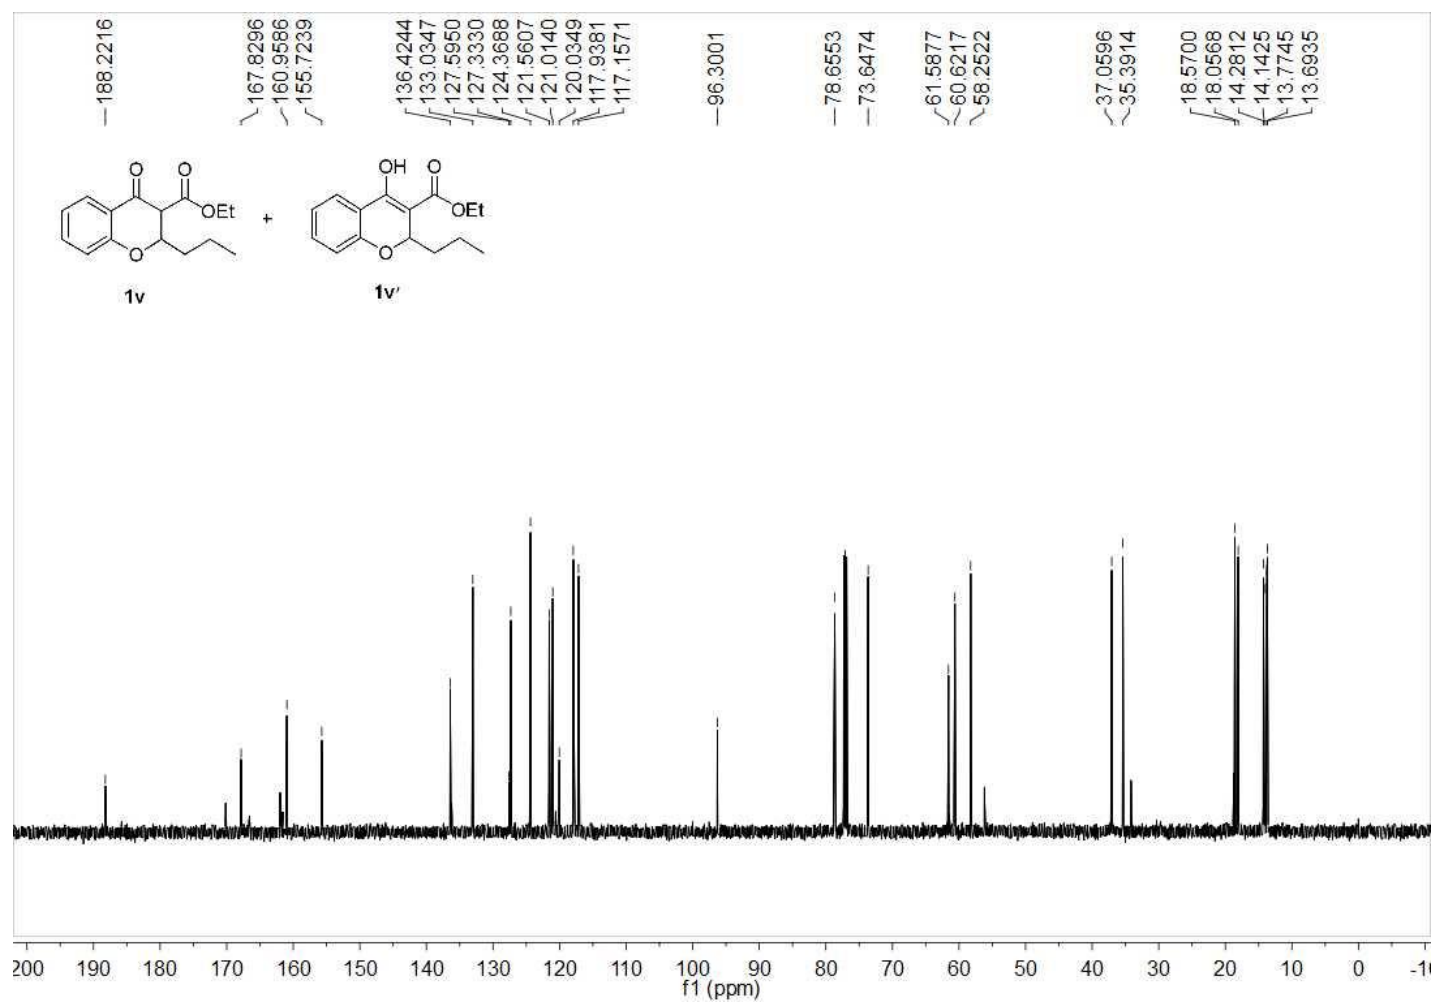

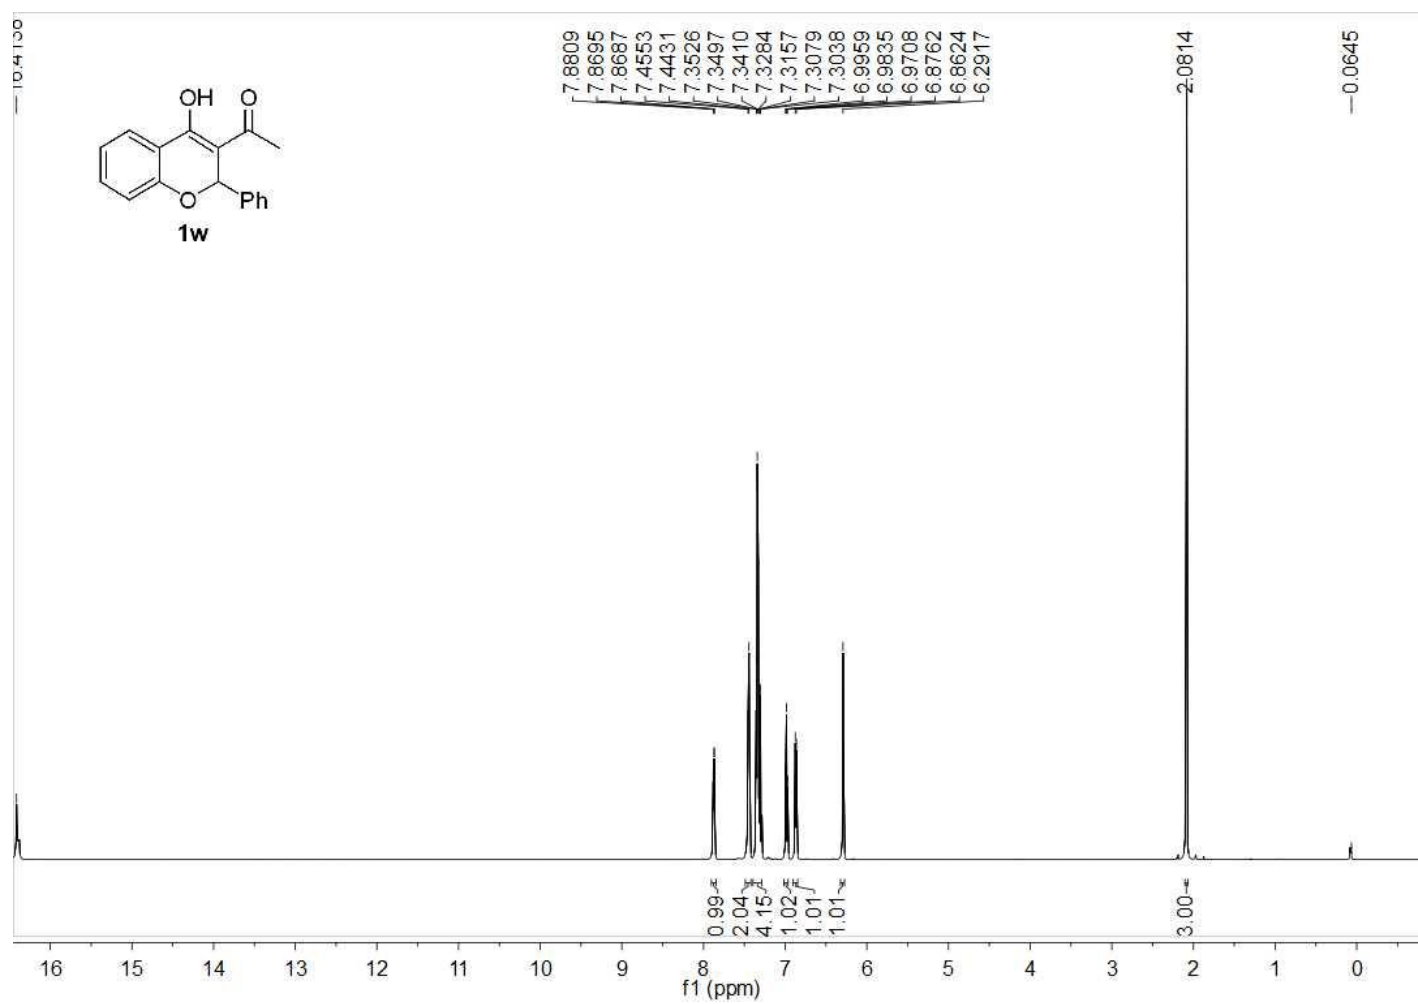

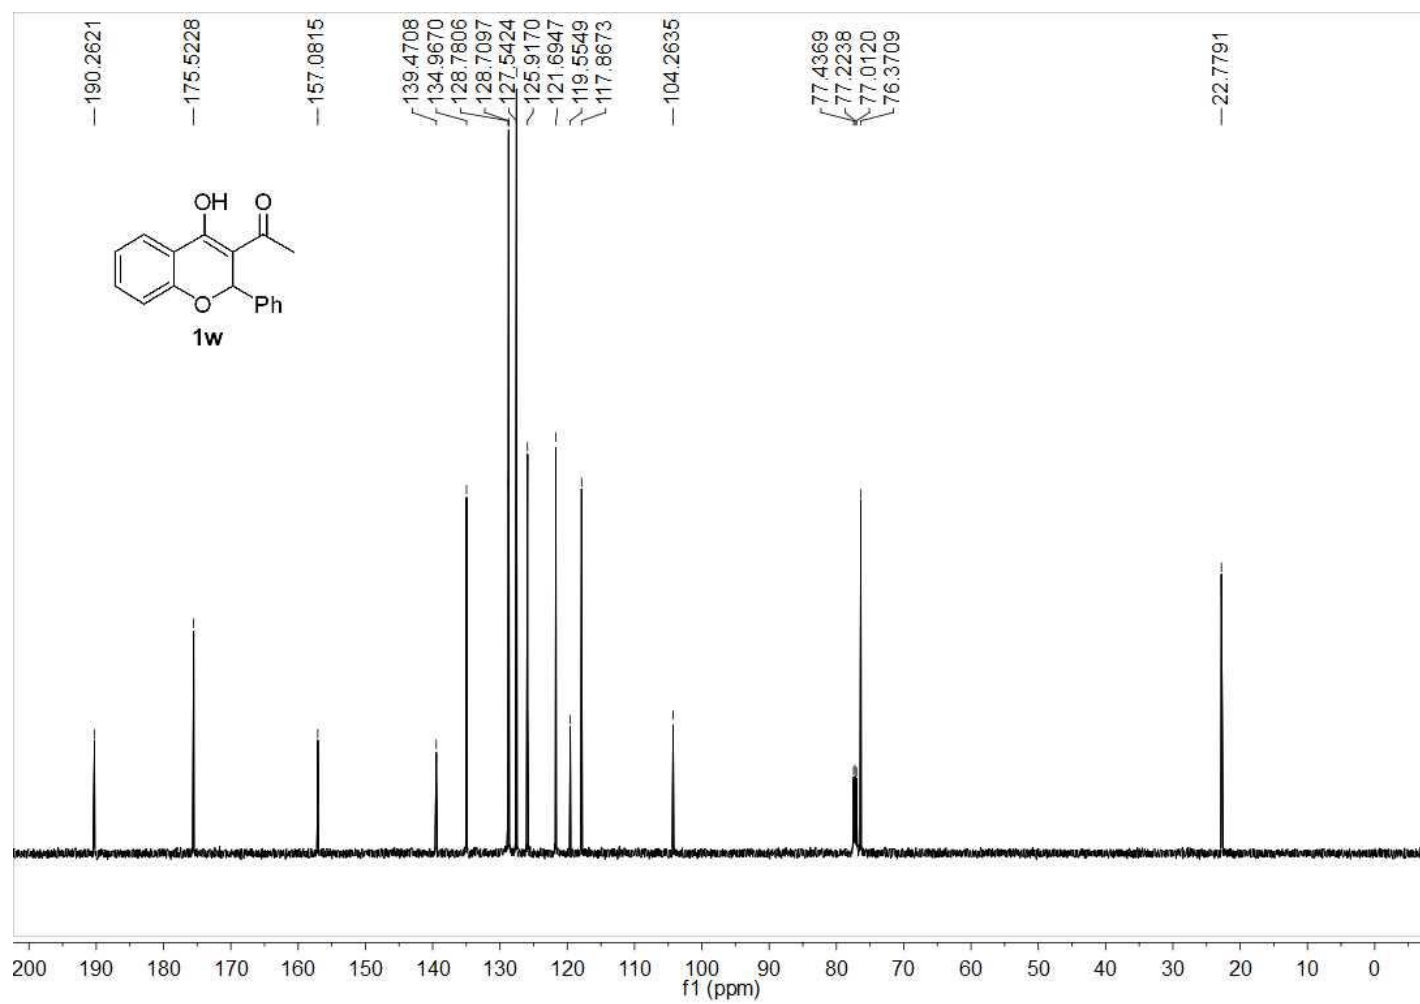

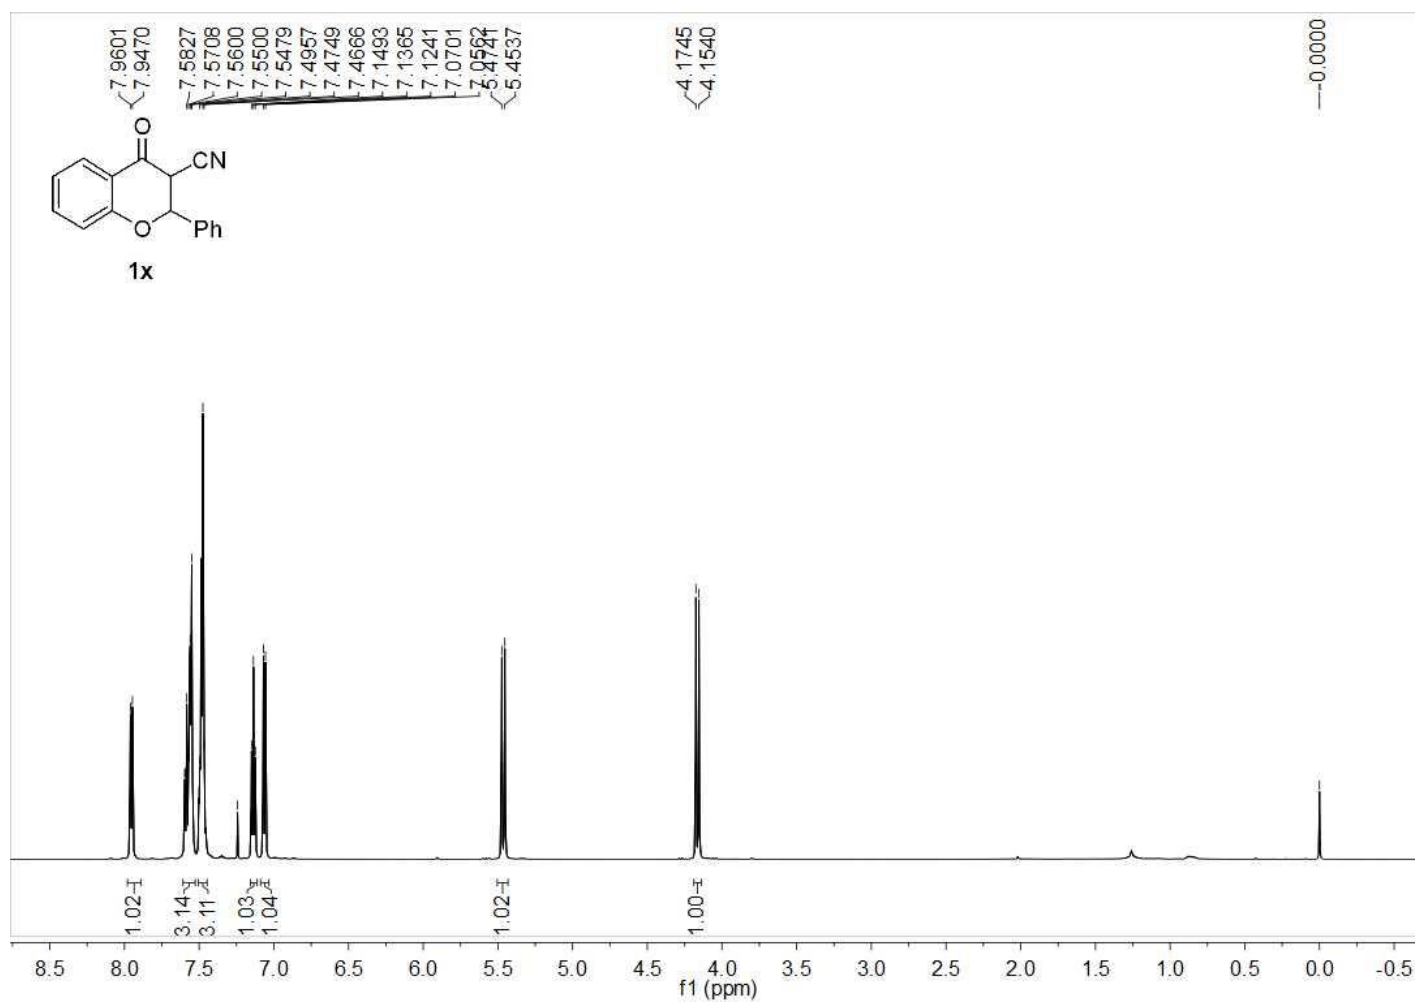

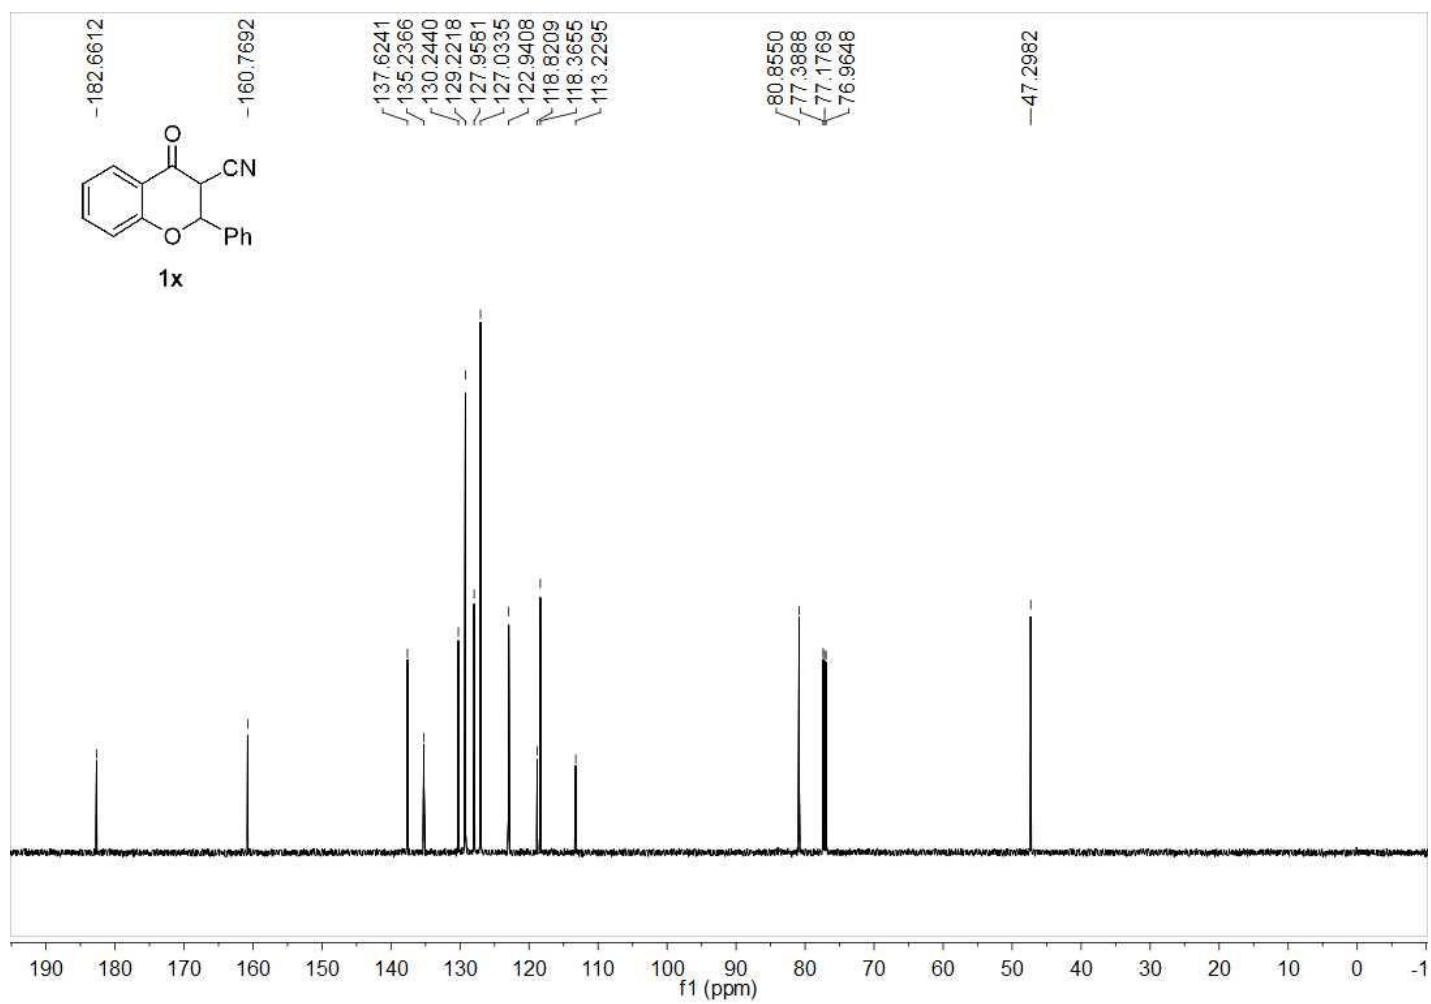



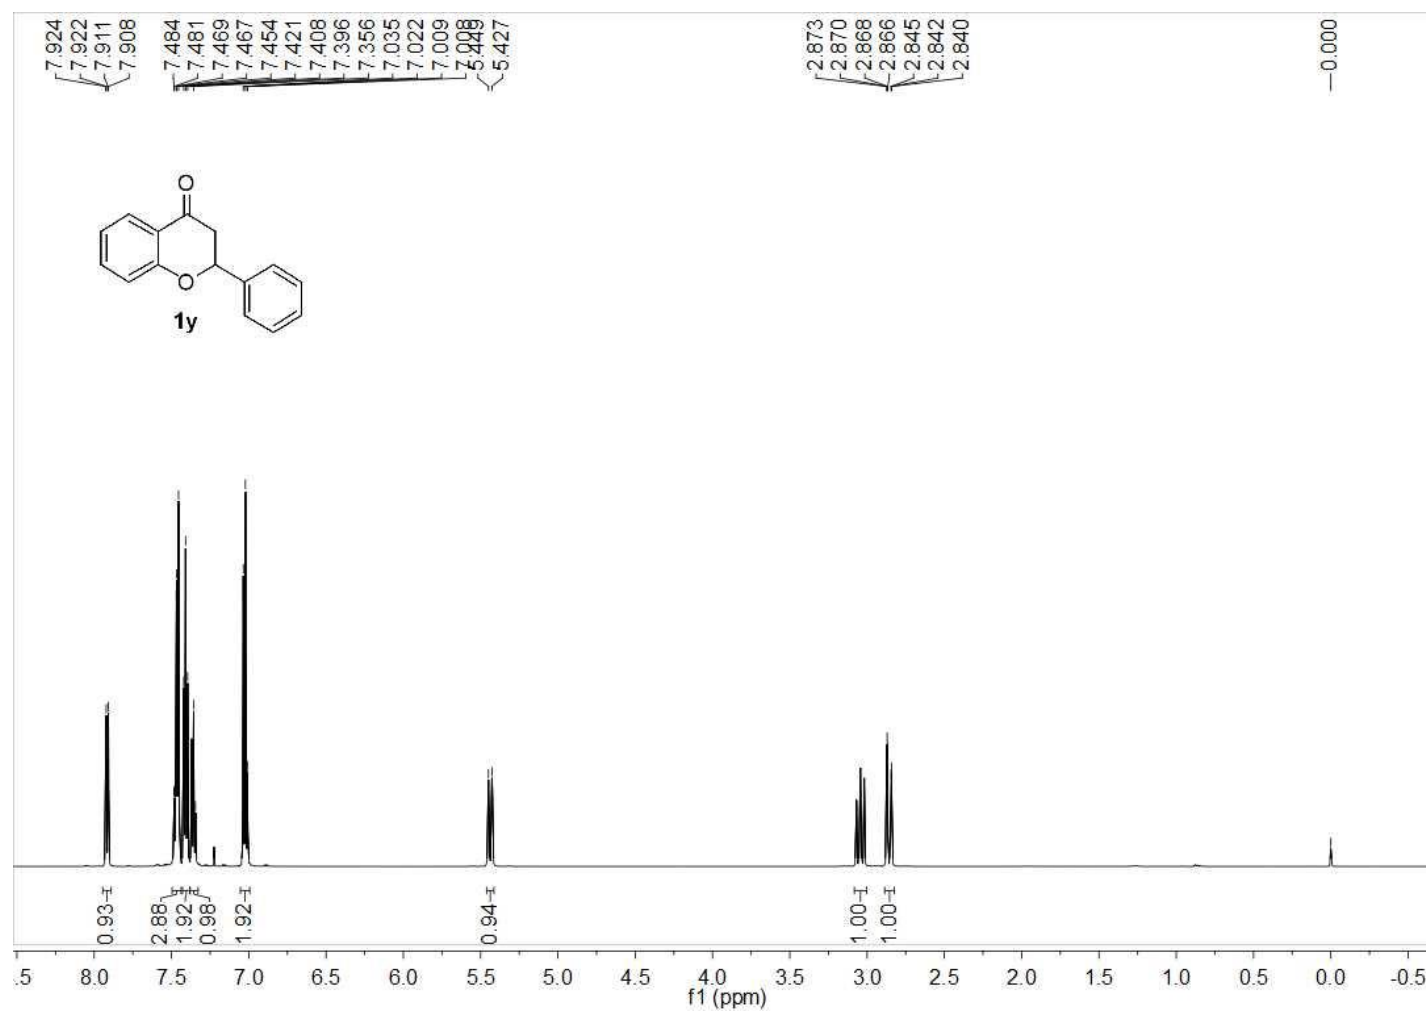

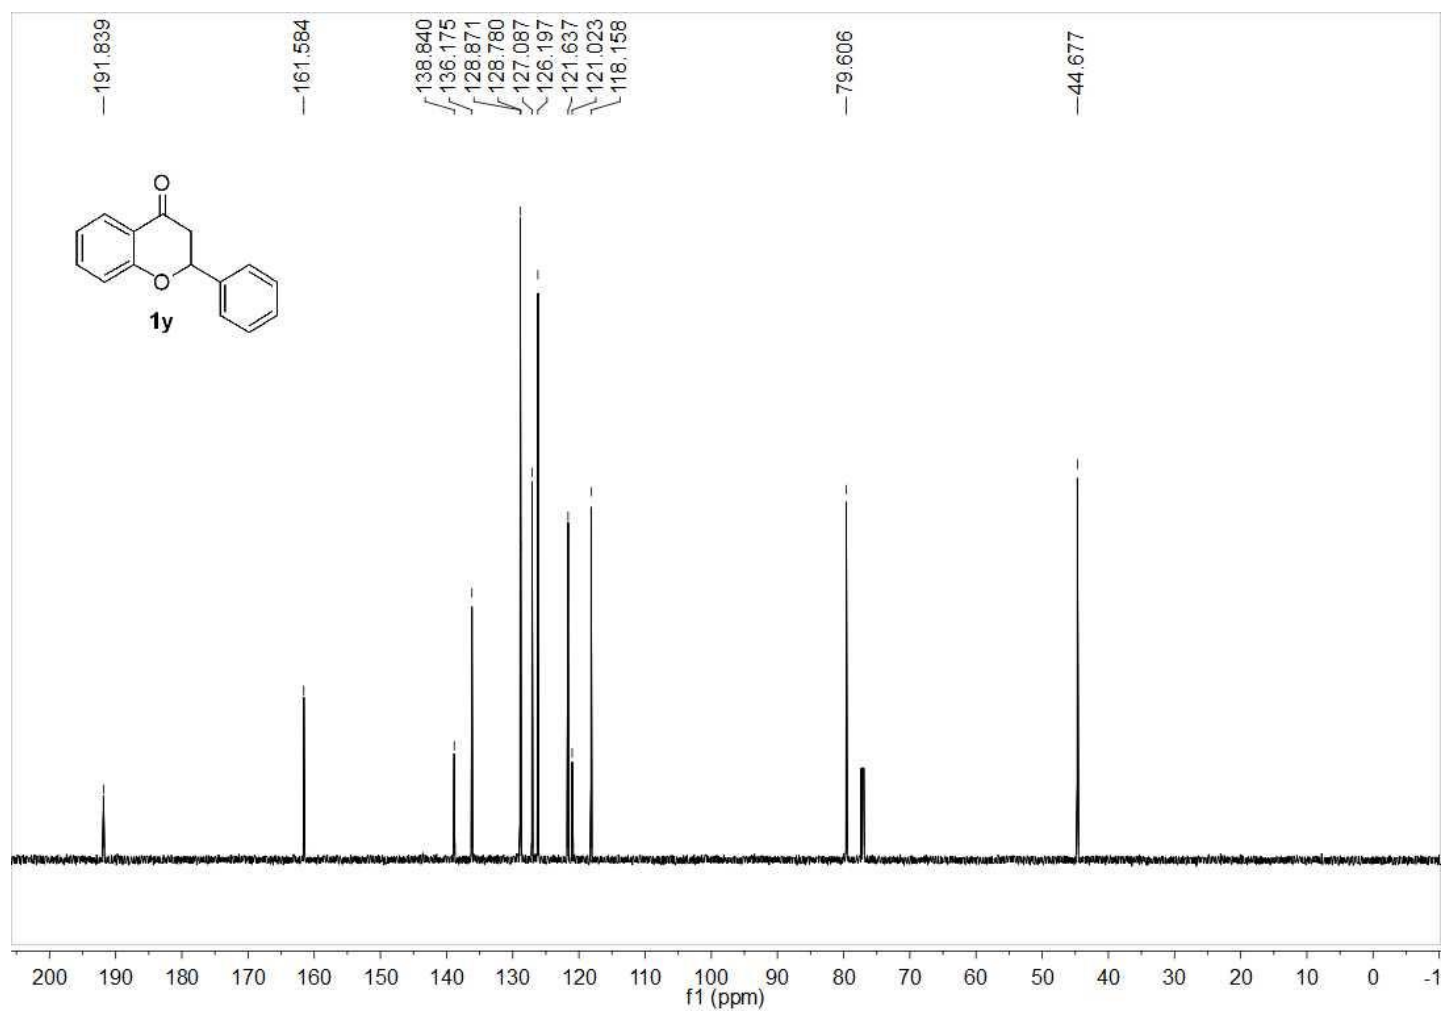

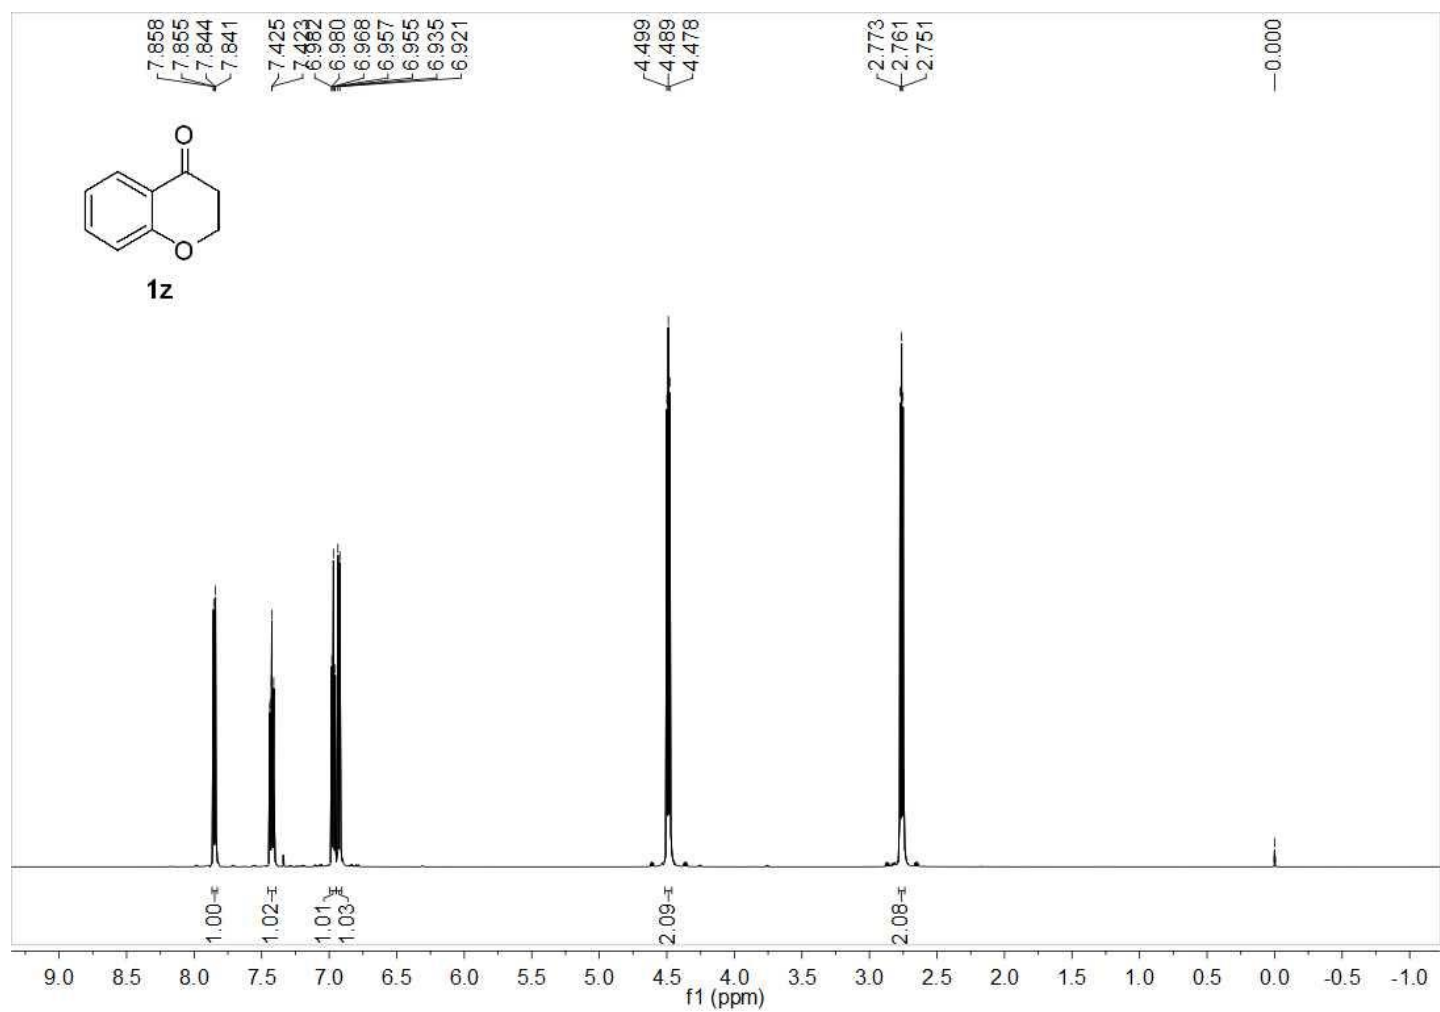

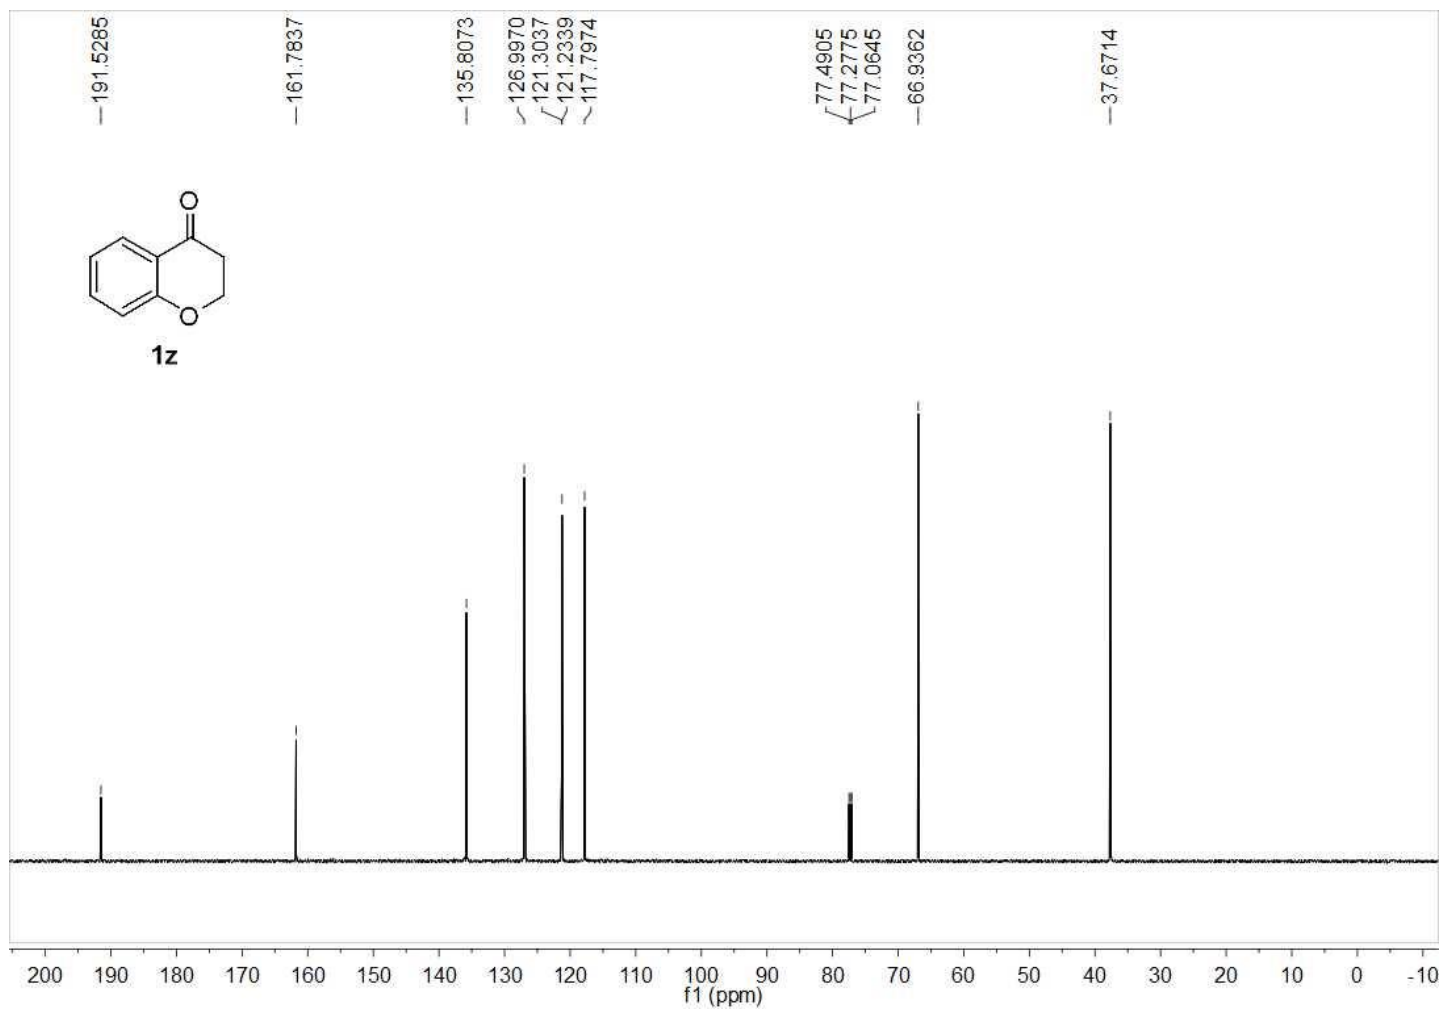

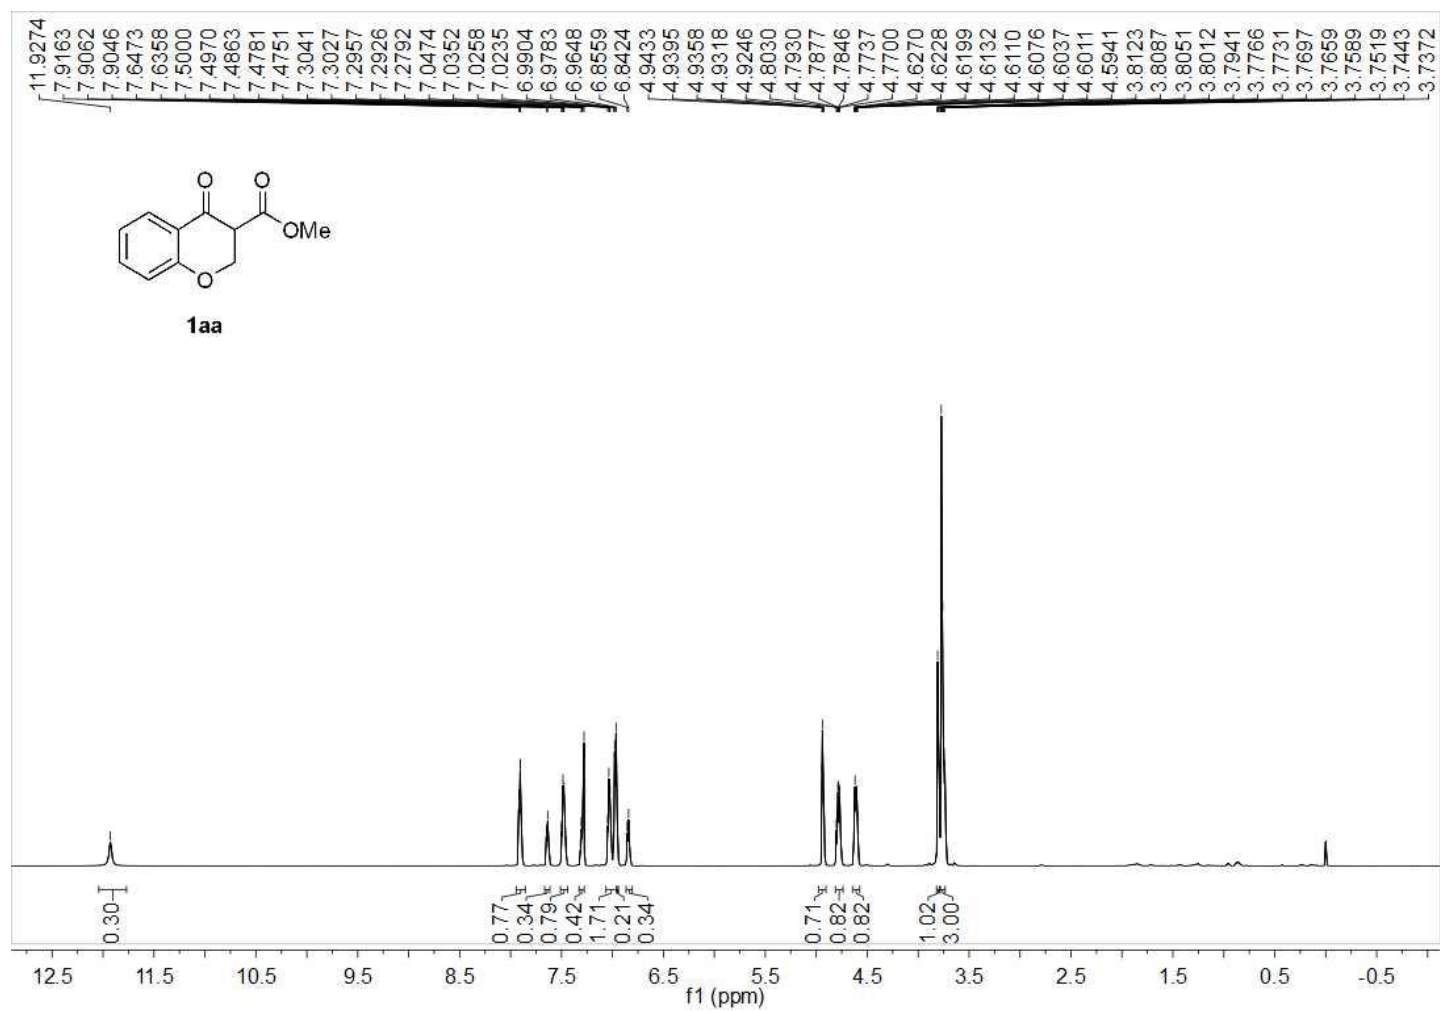

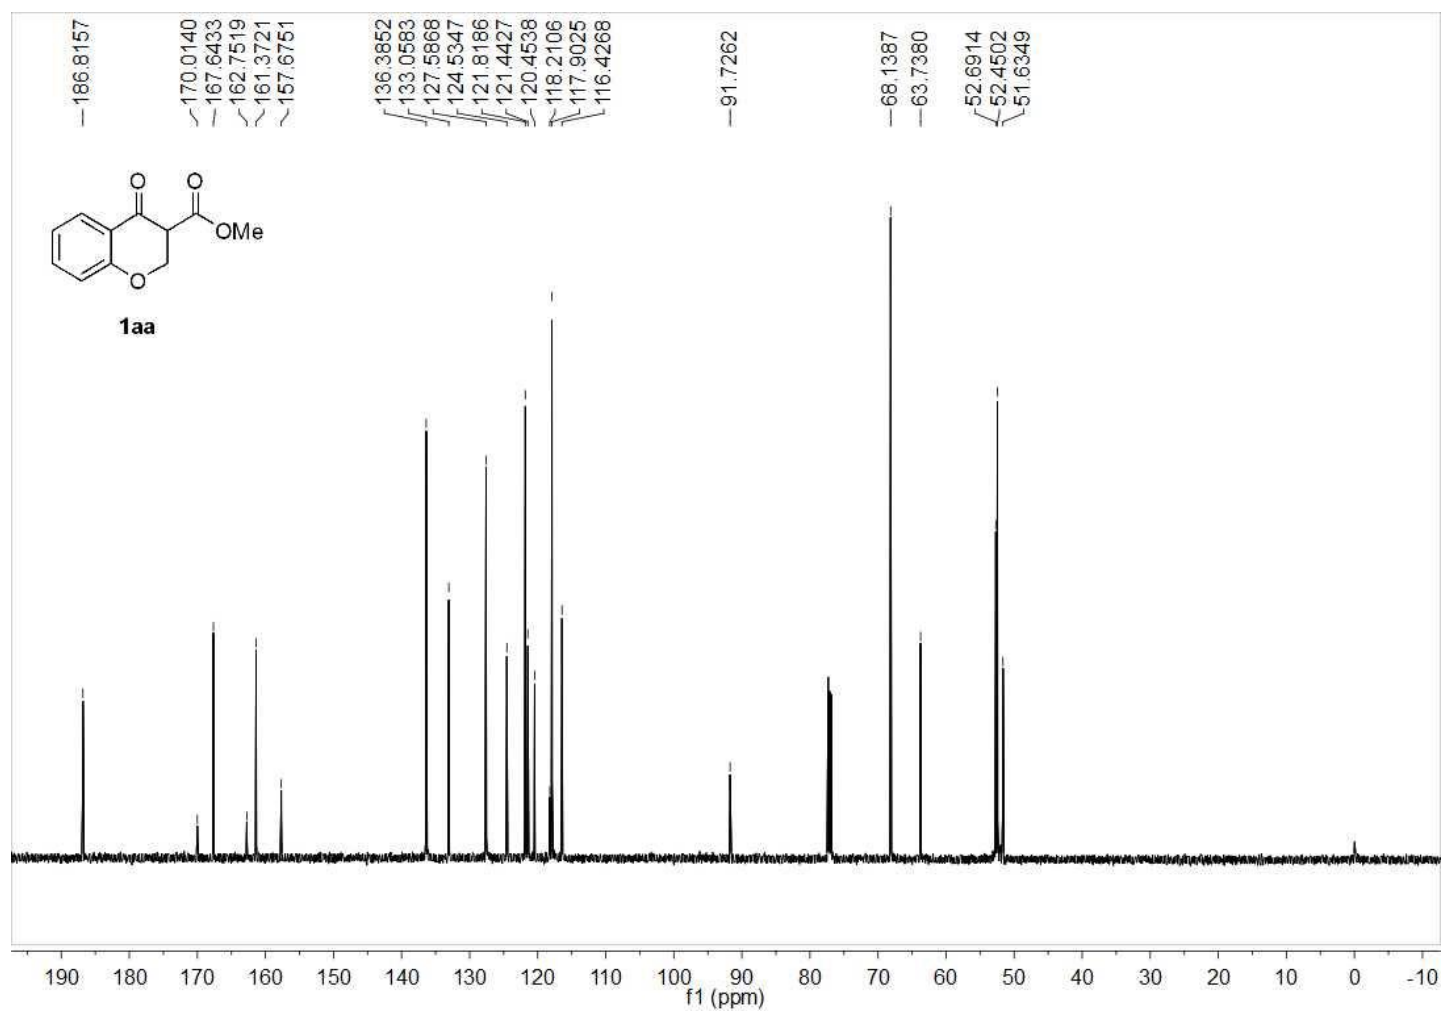

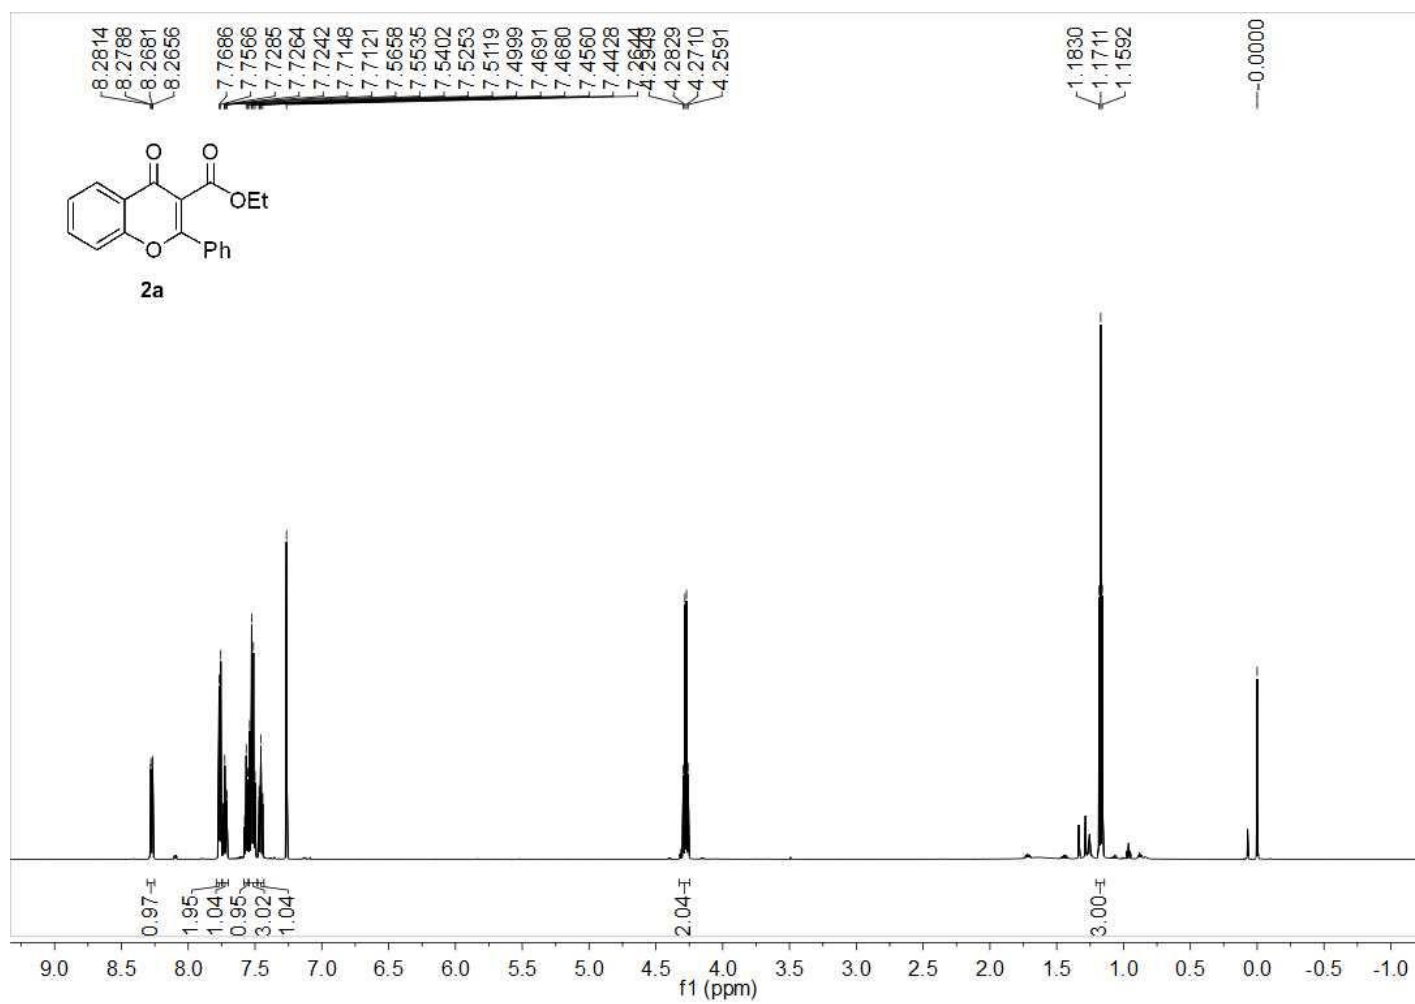

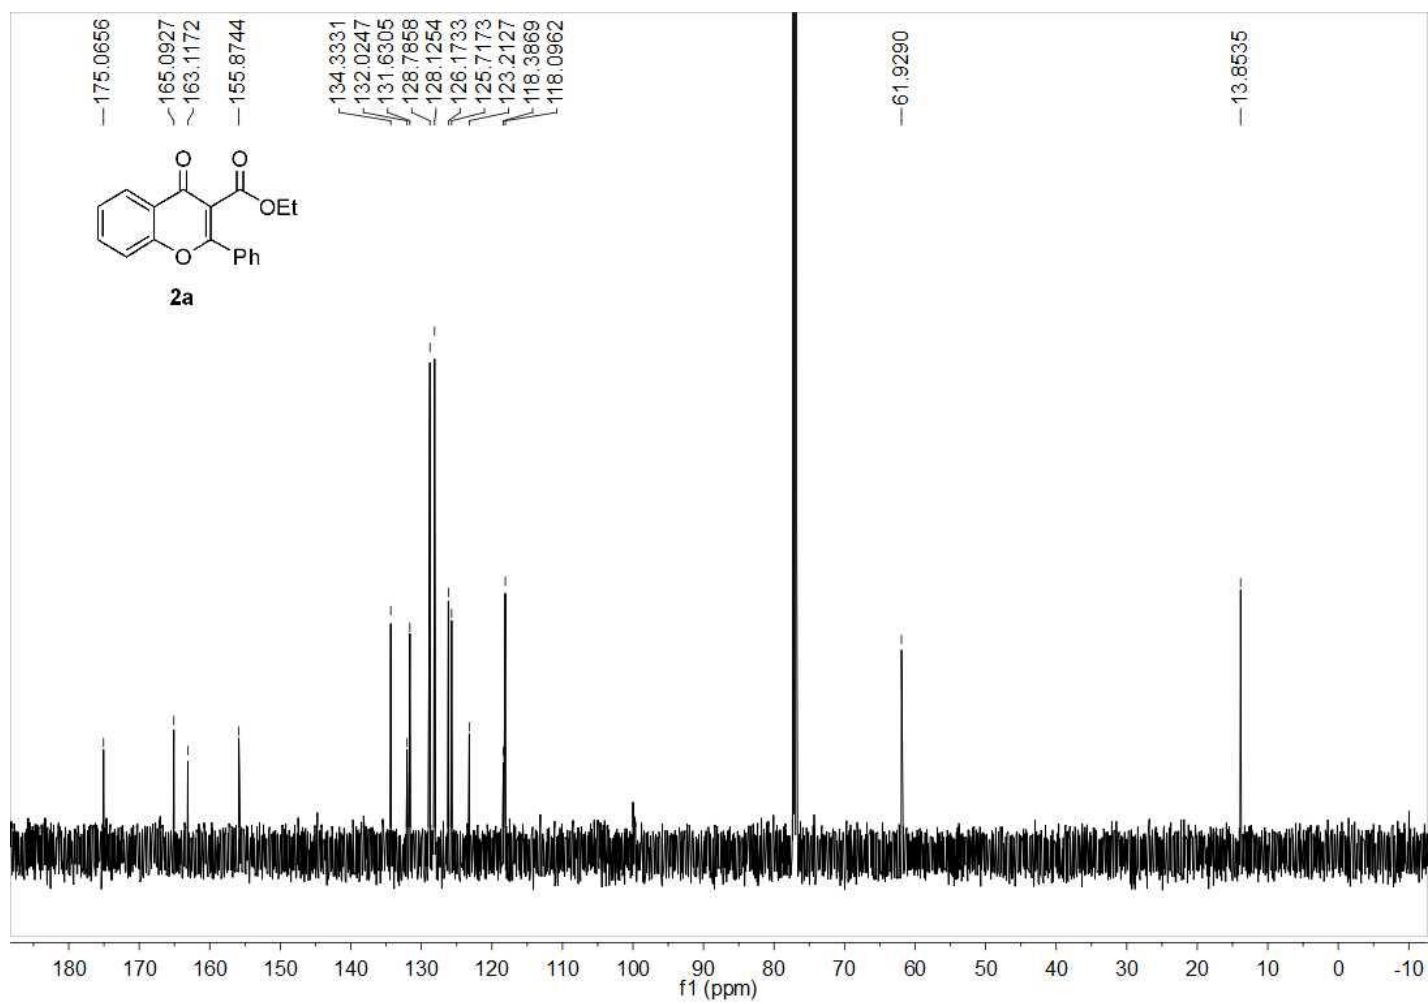



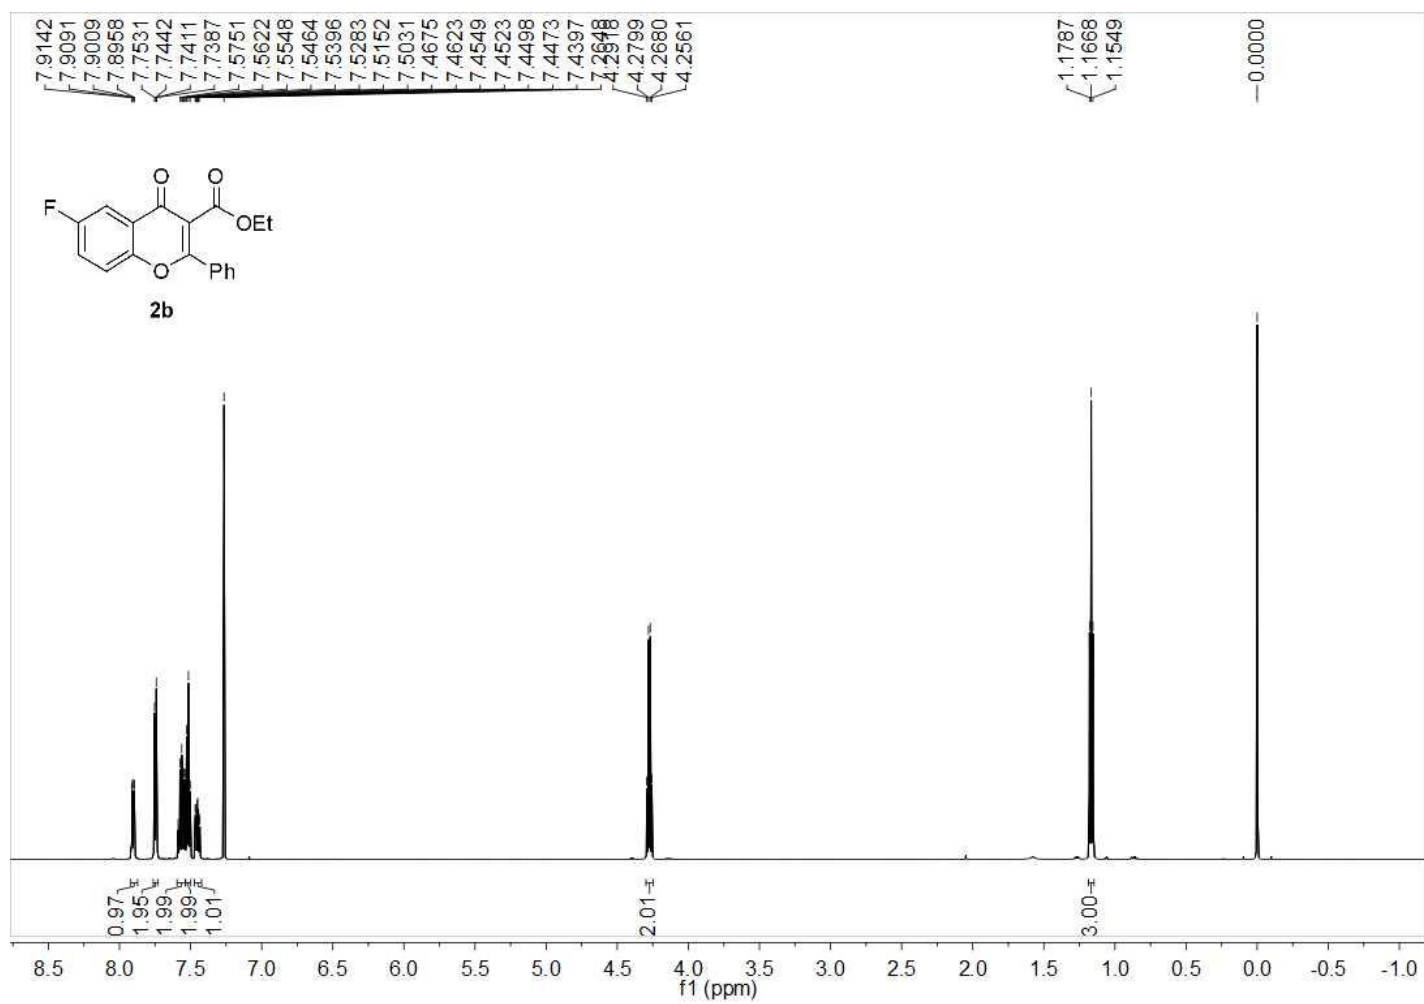

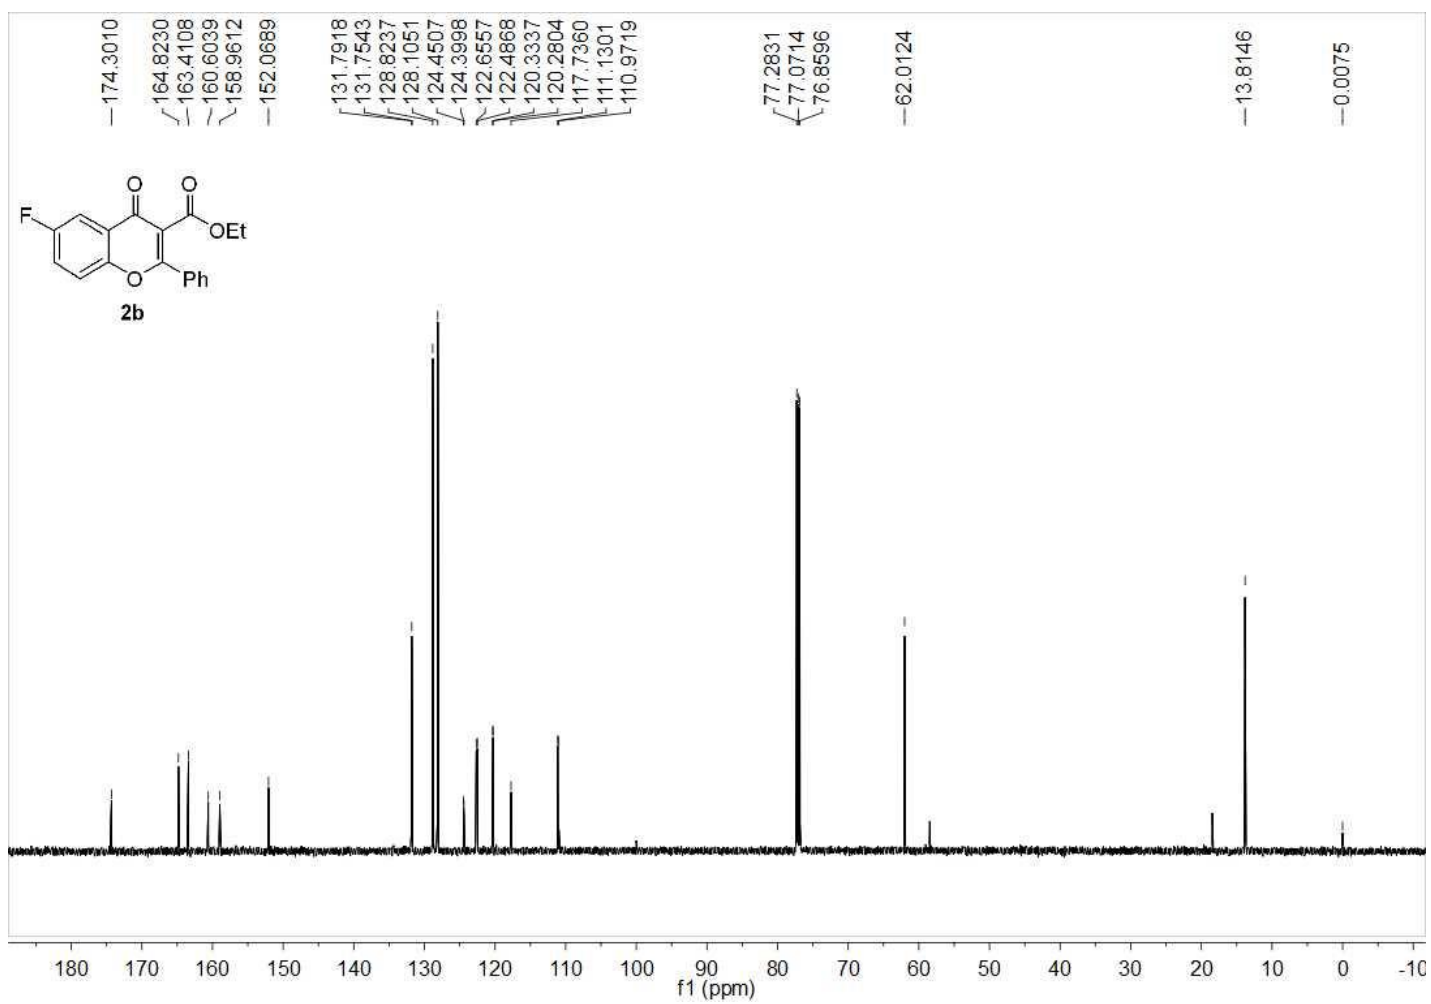

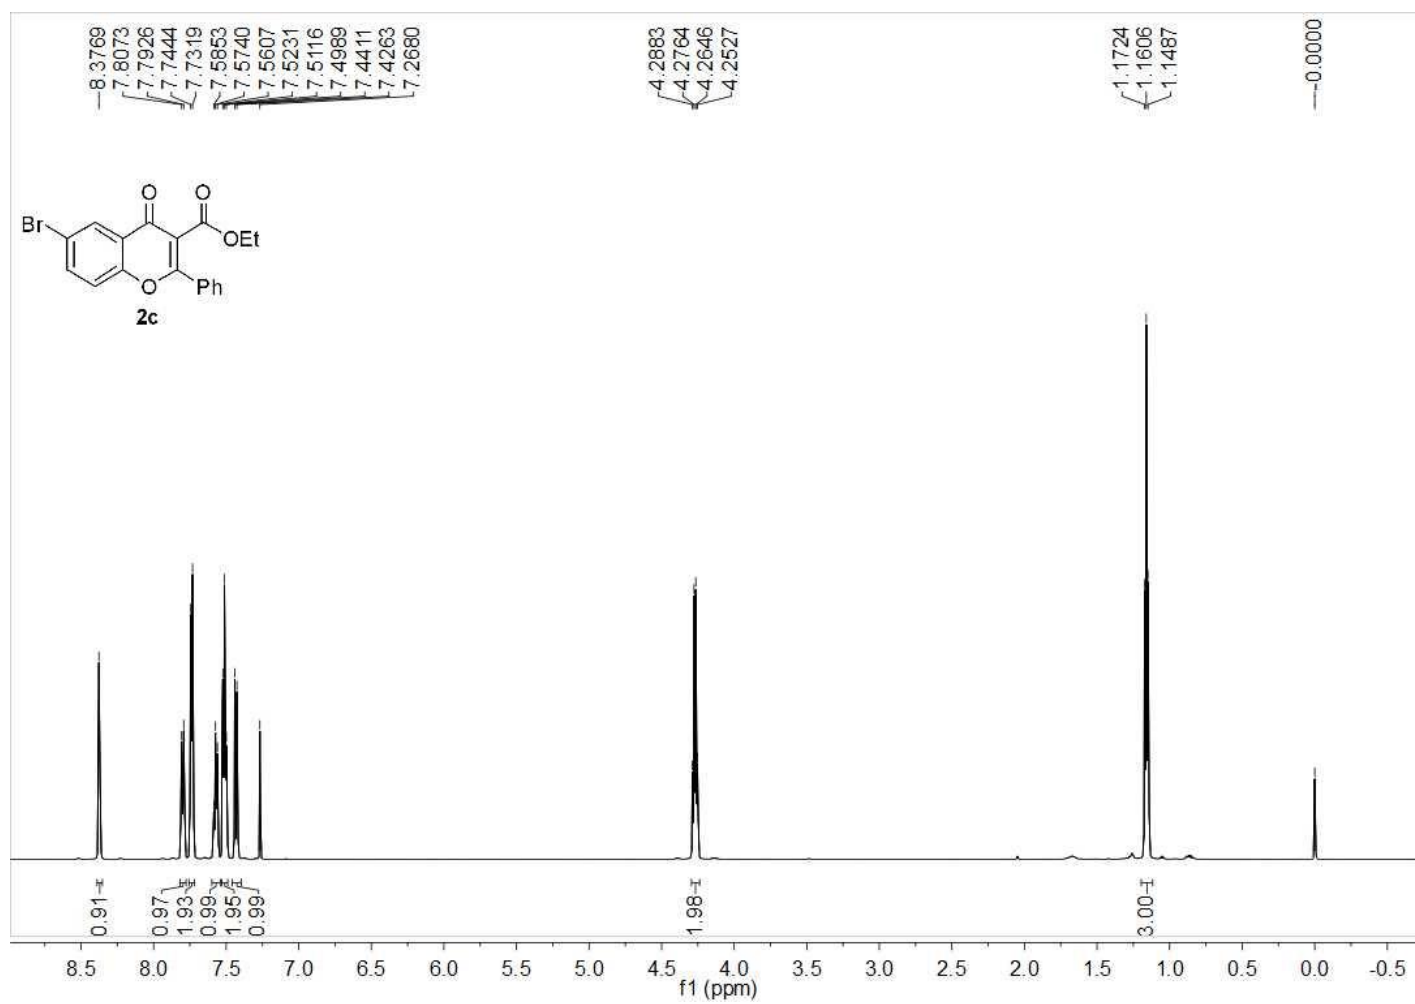

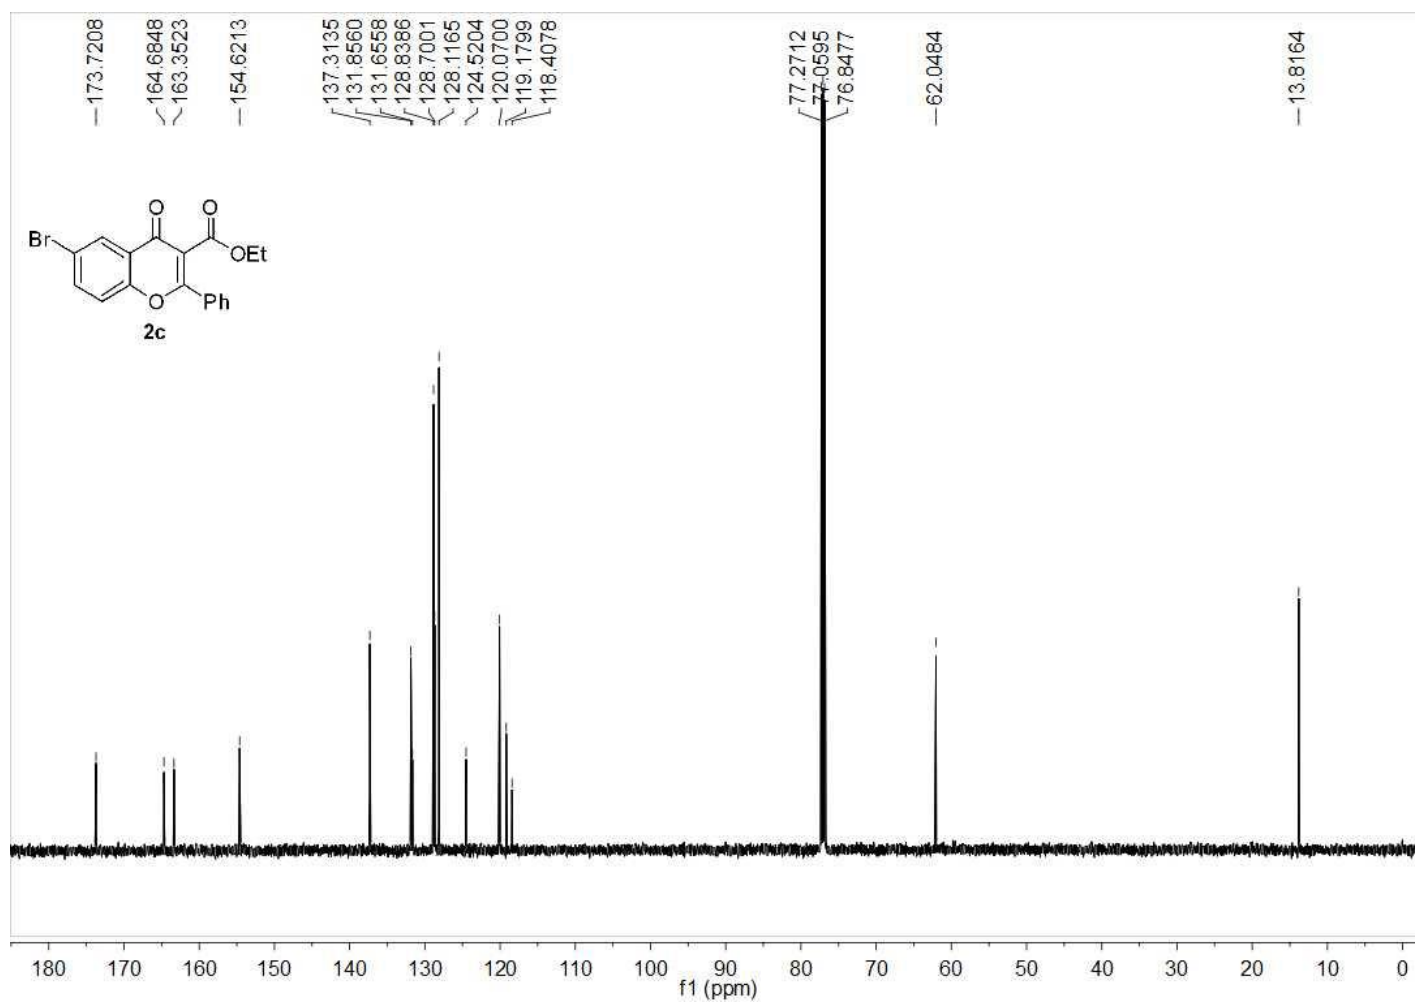

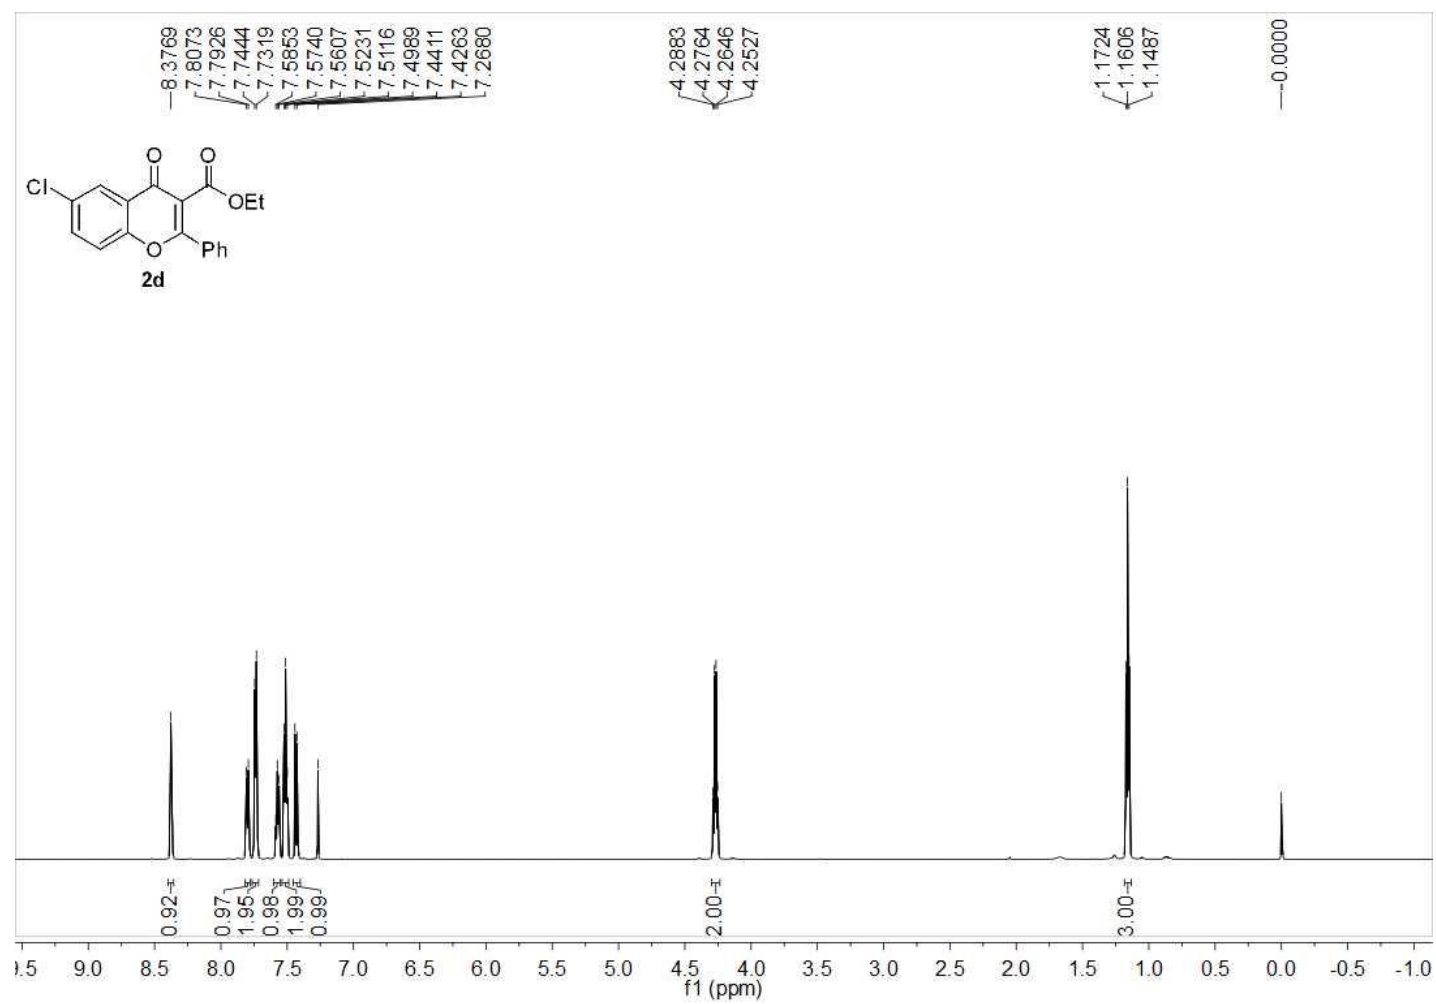

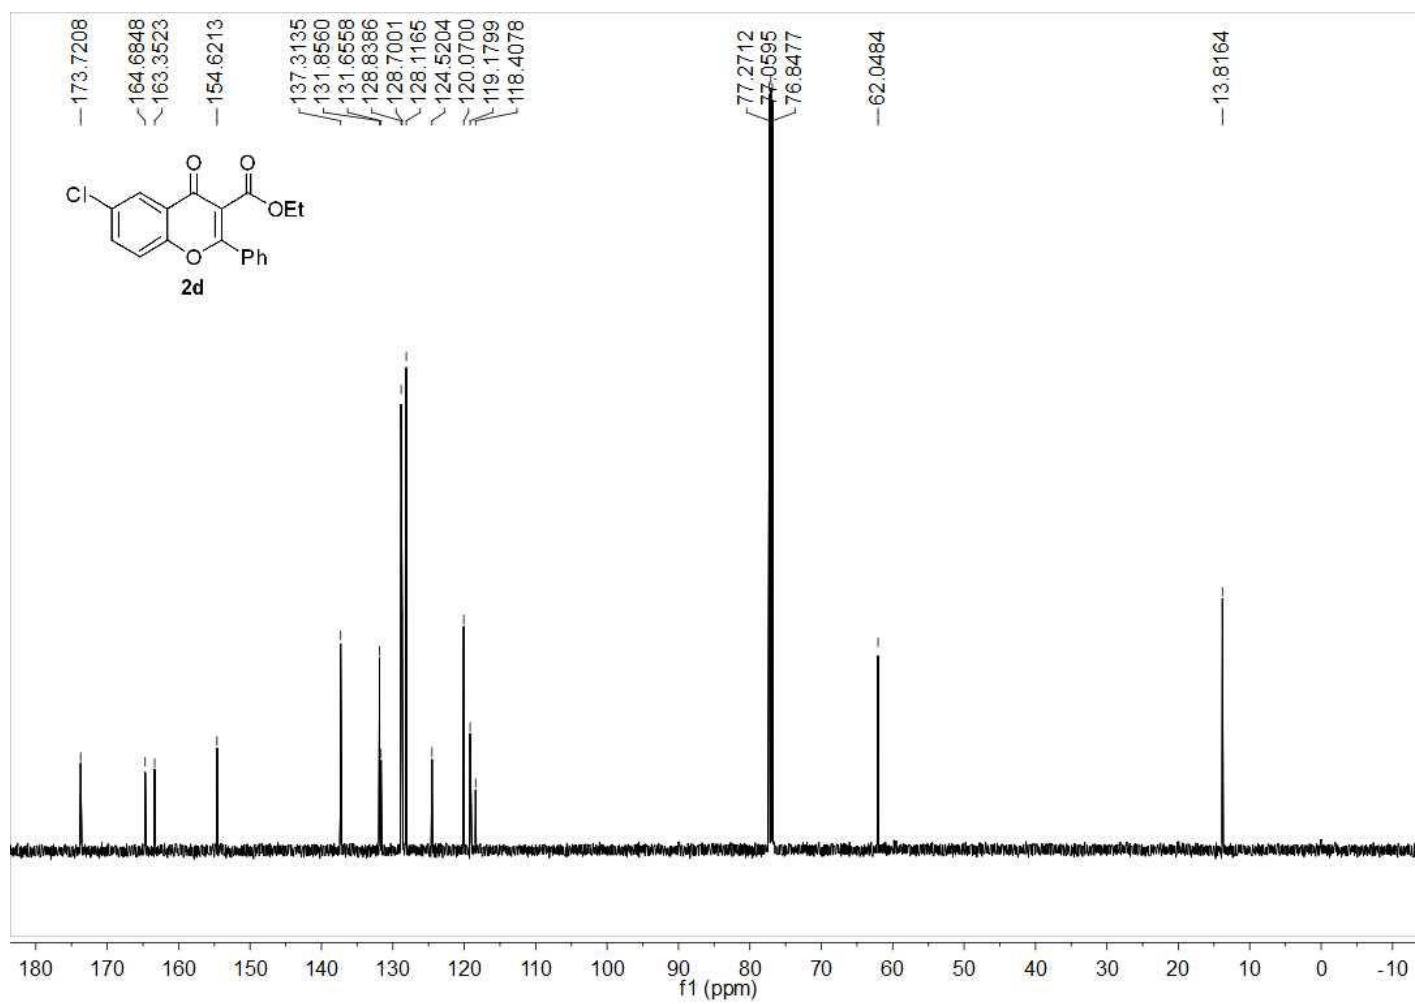

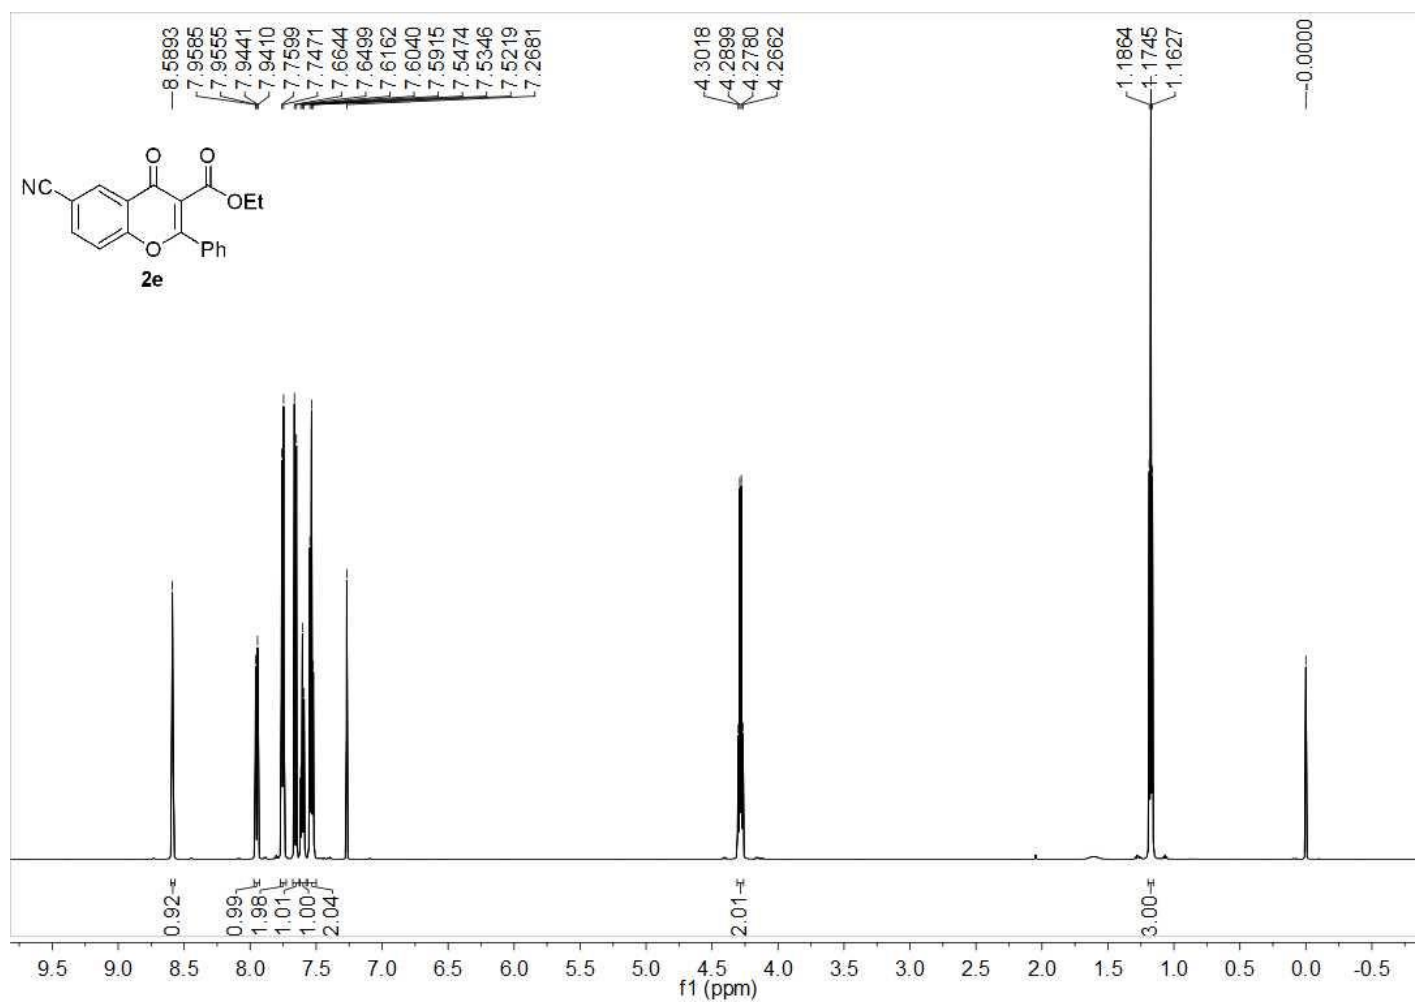

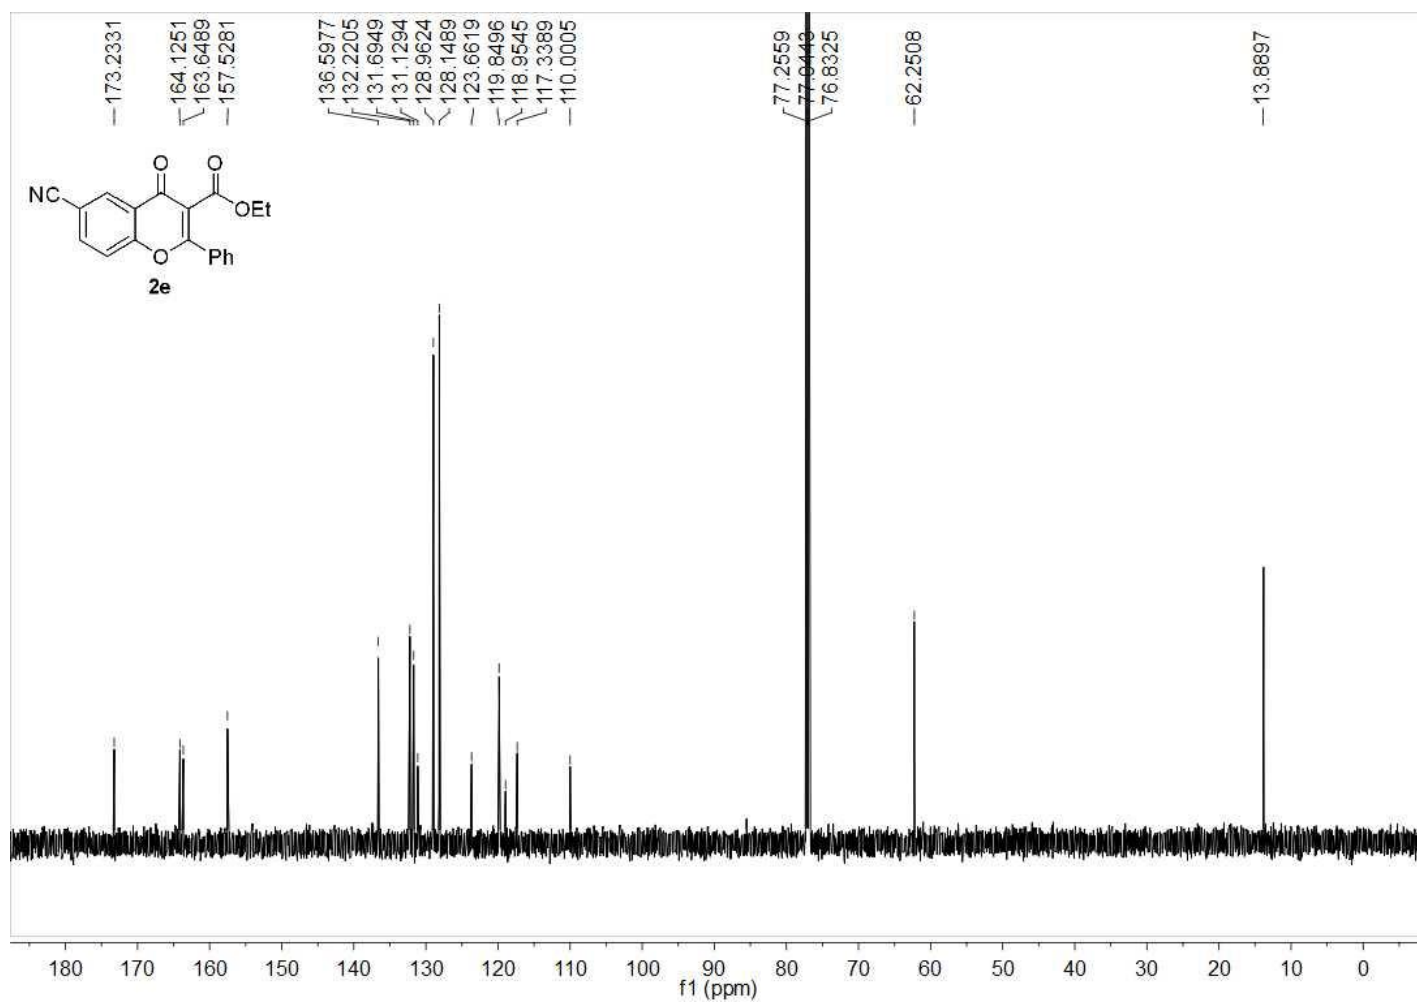



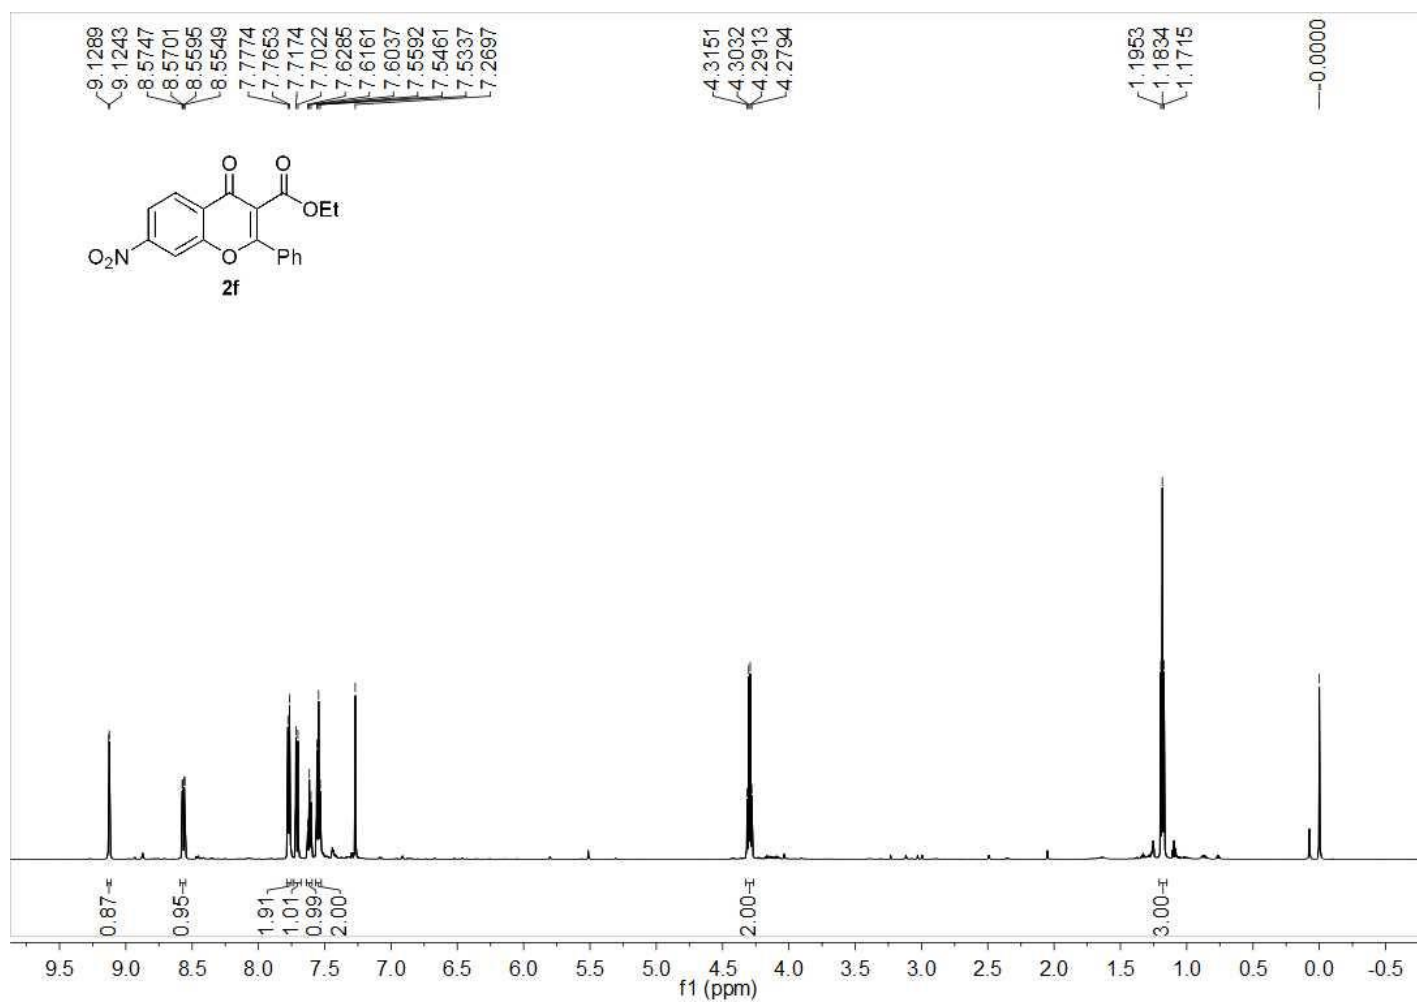

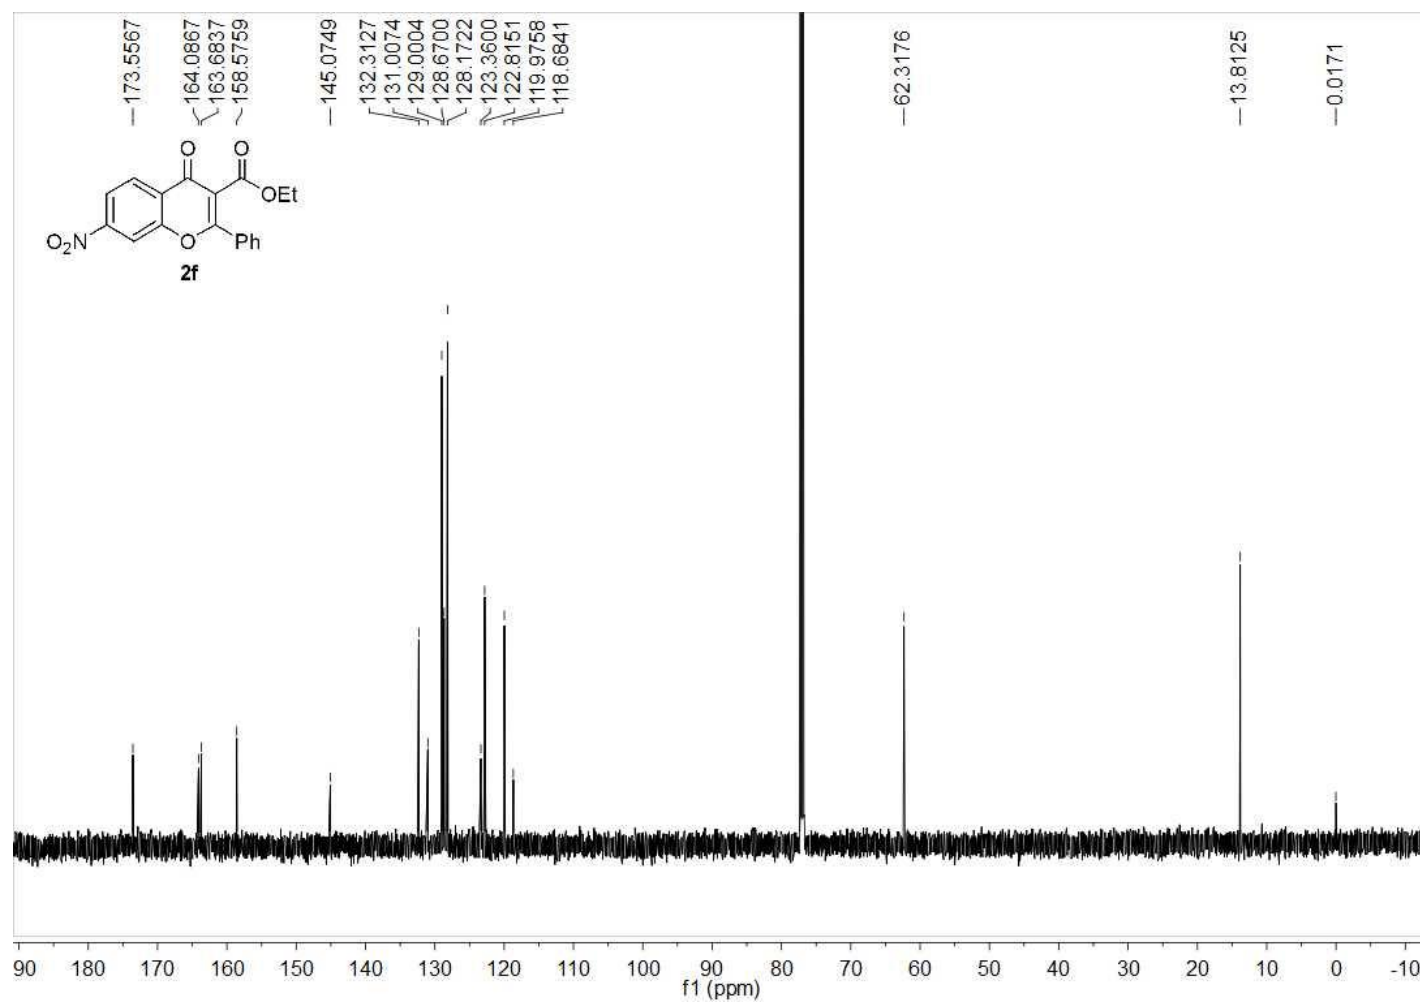

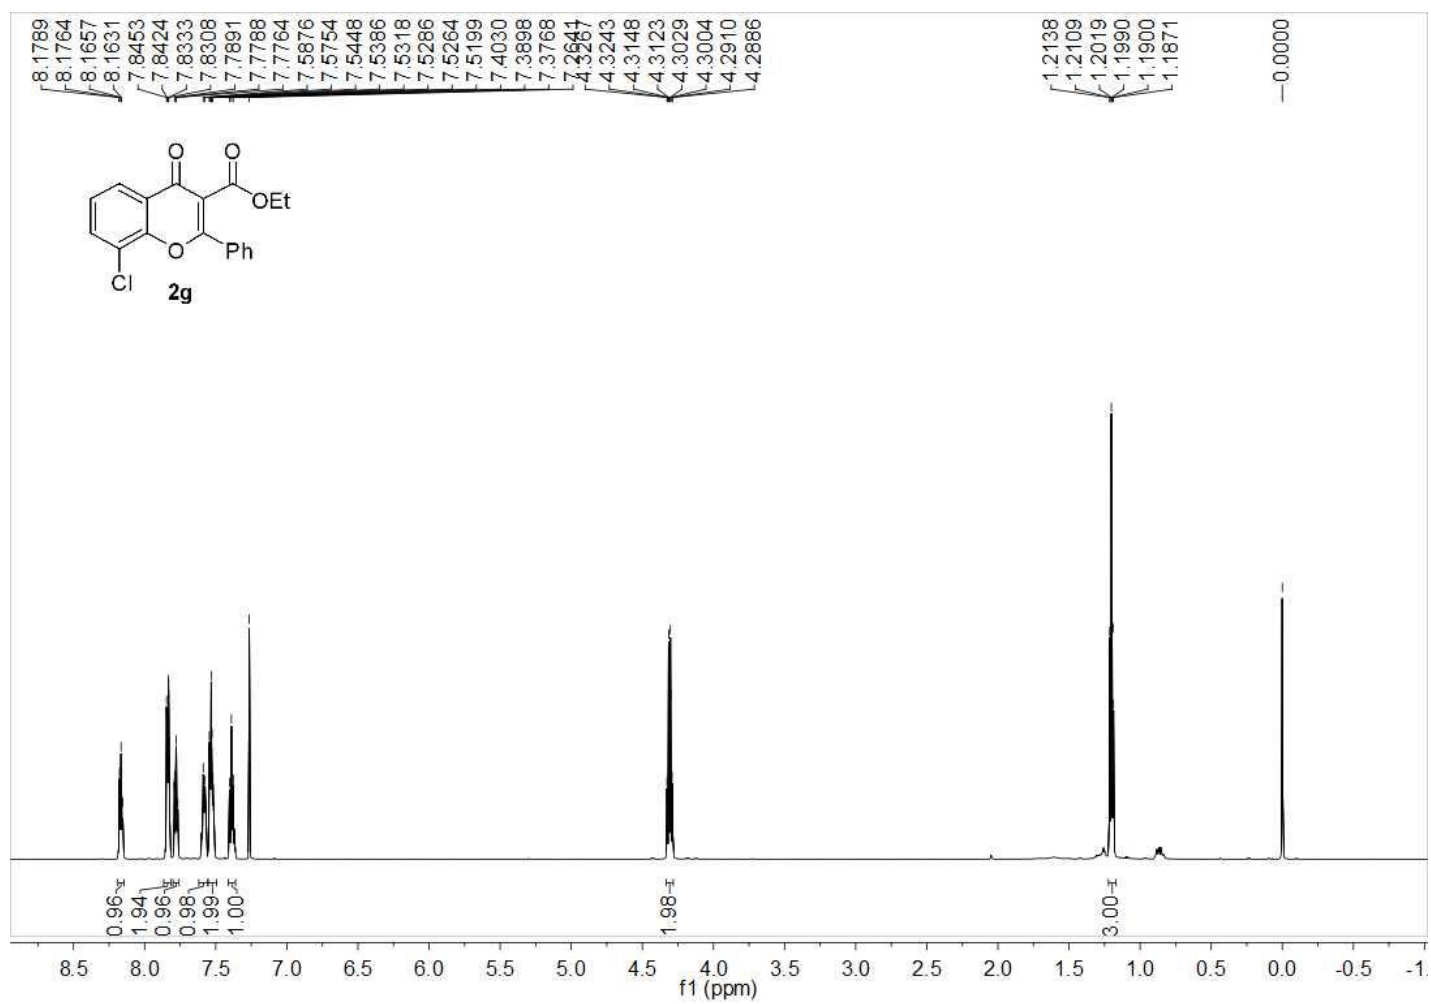

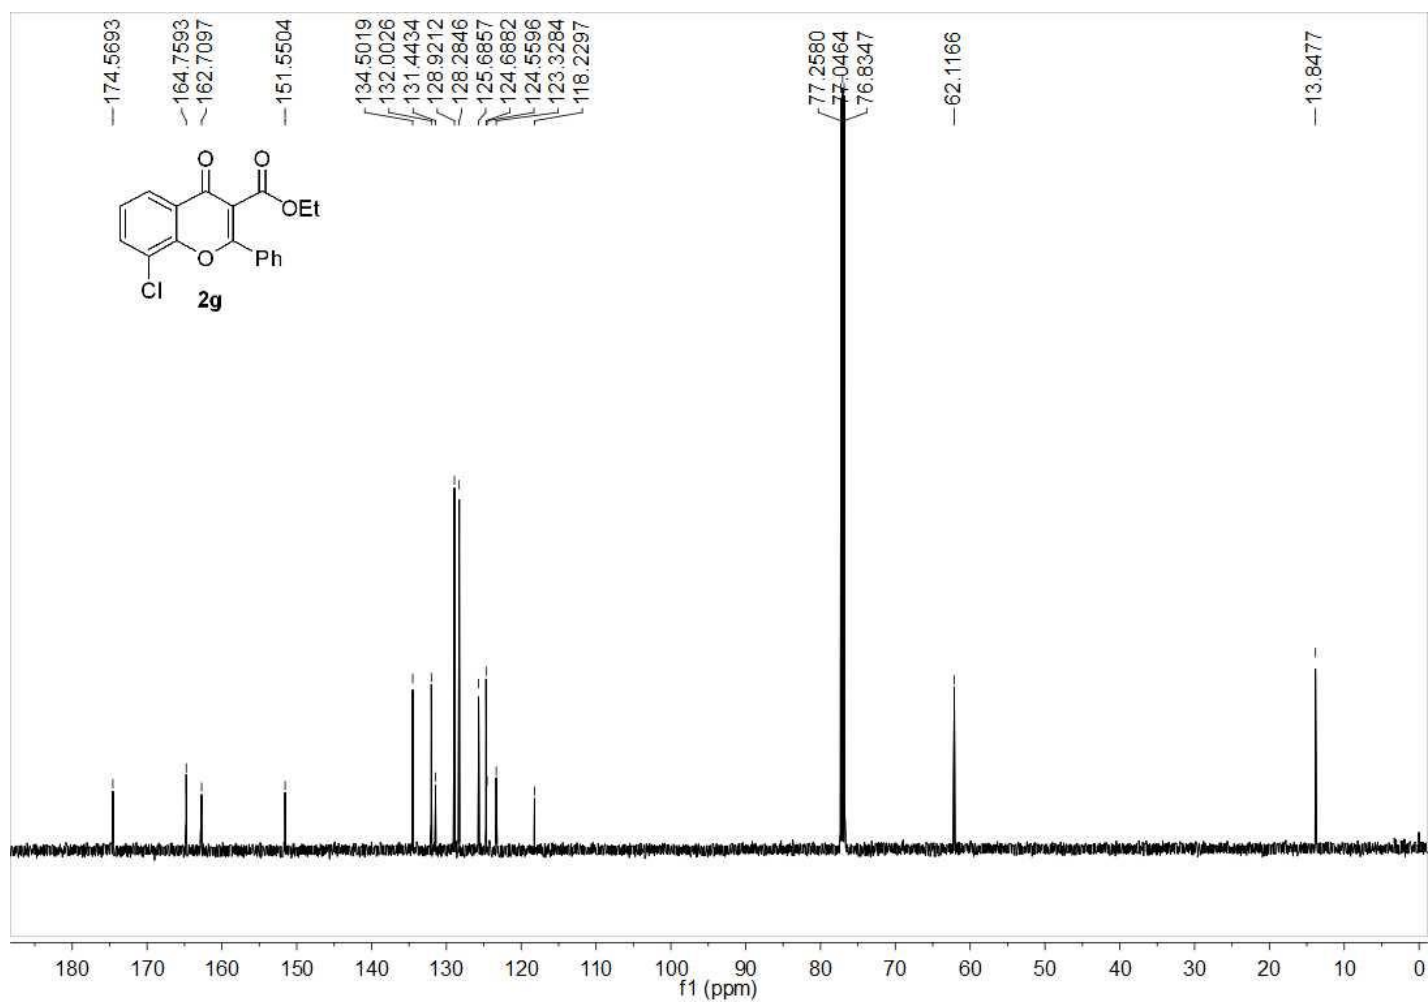

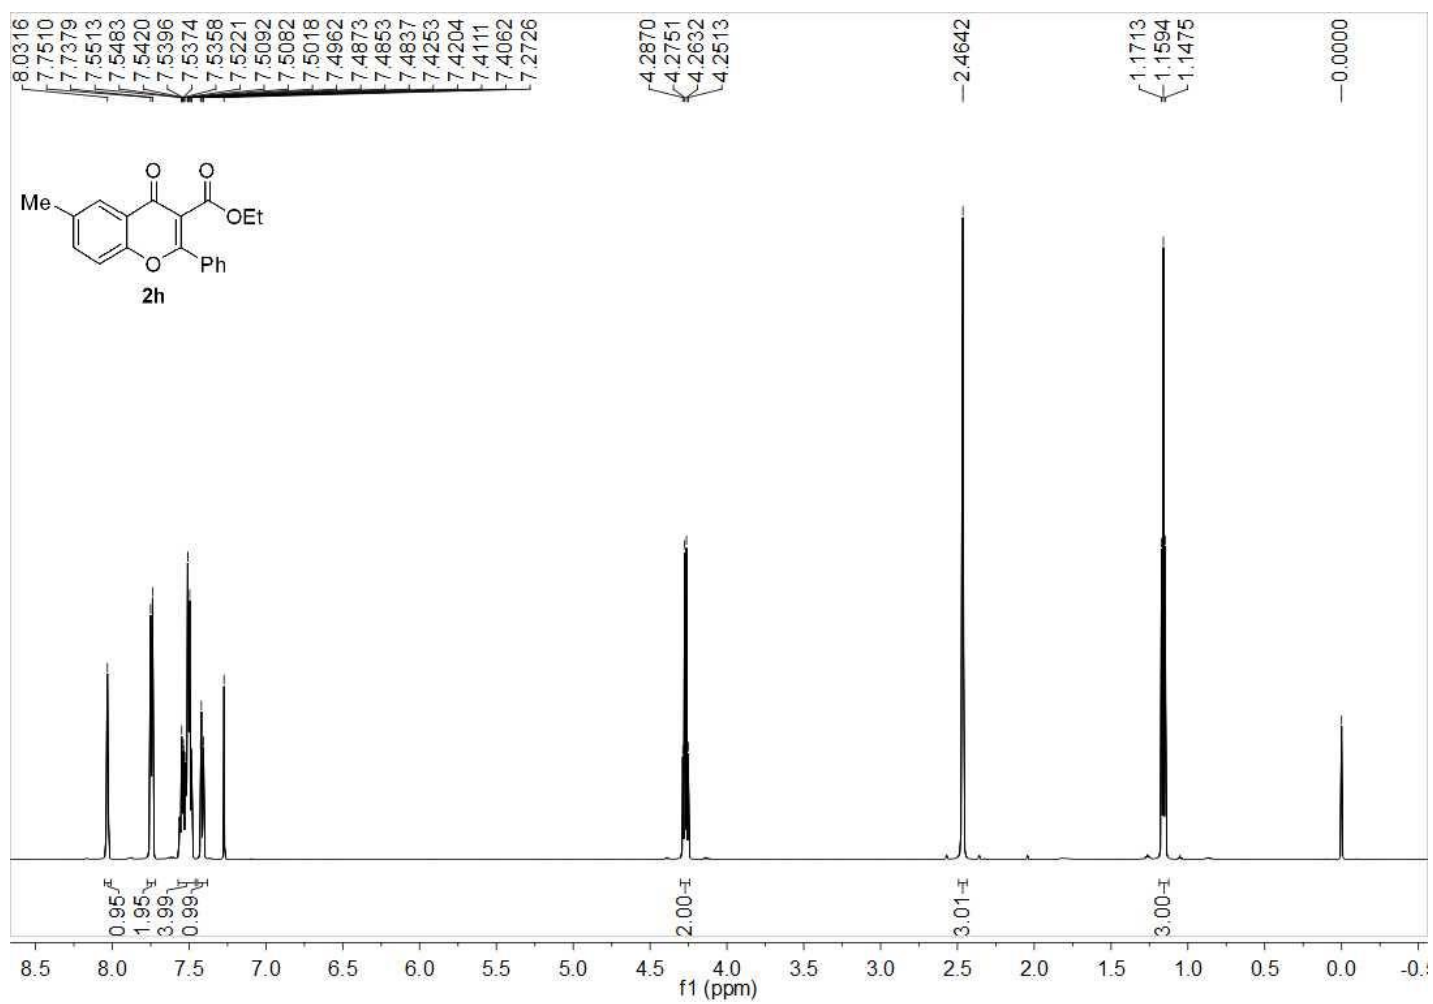

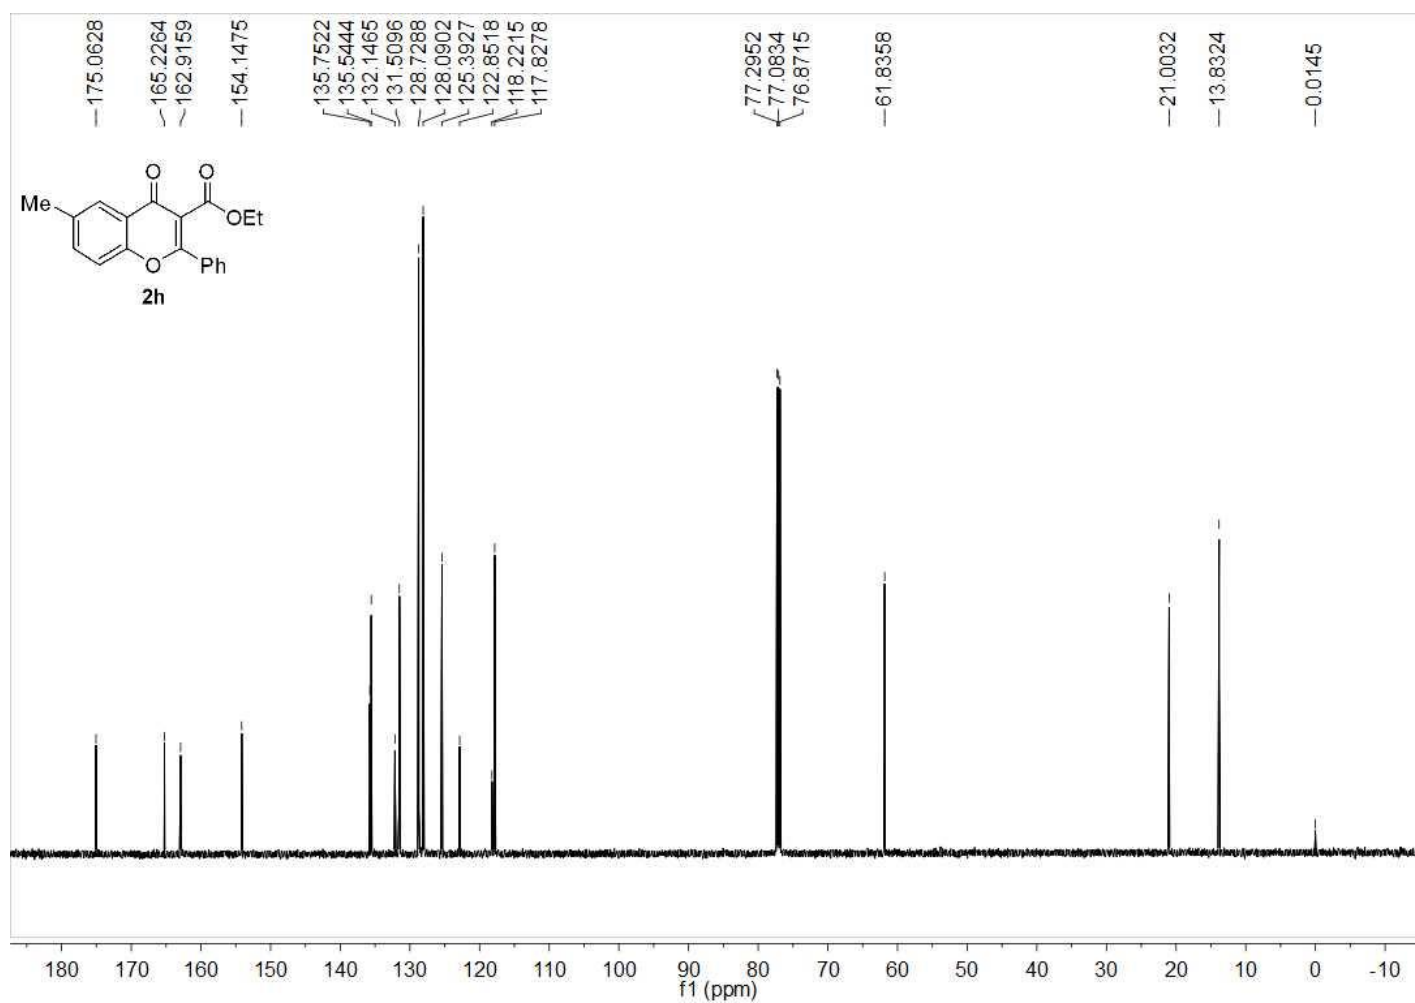

S101

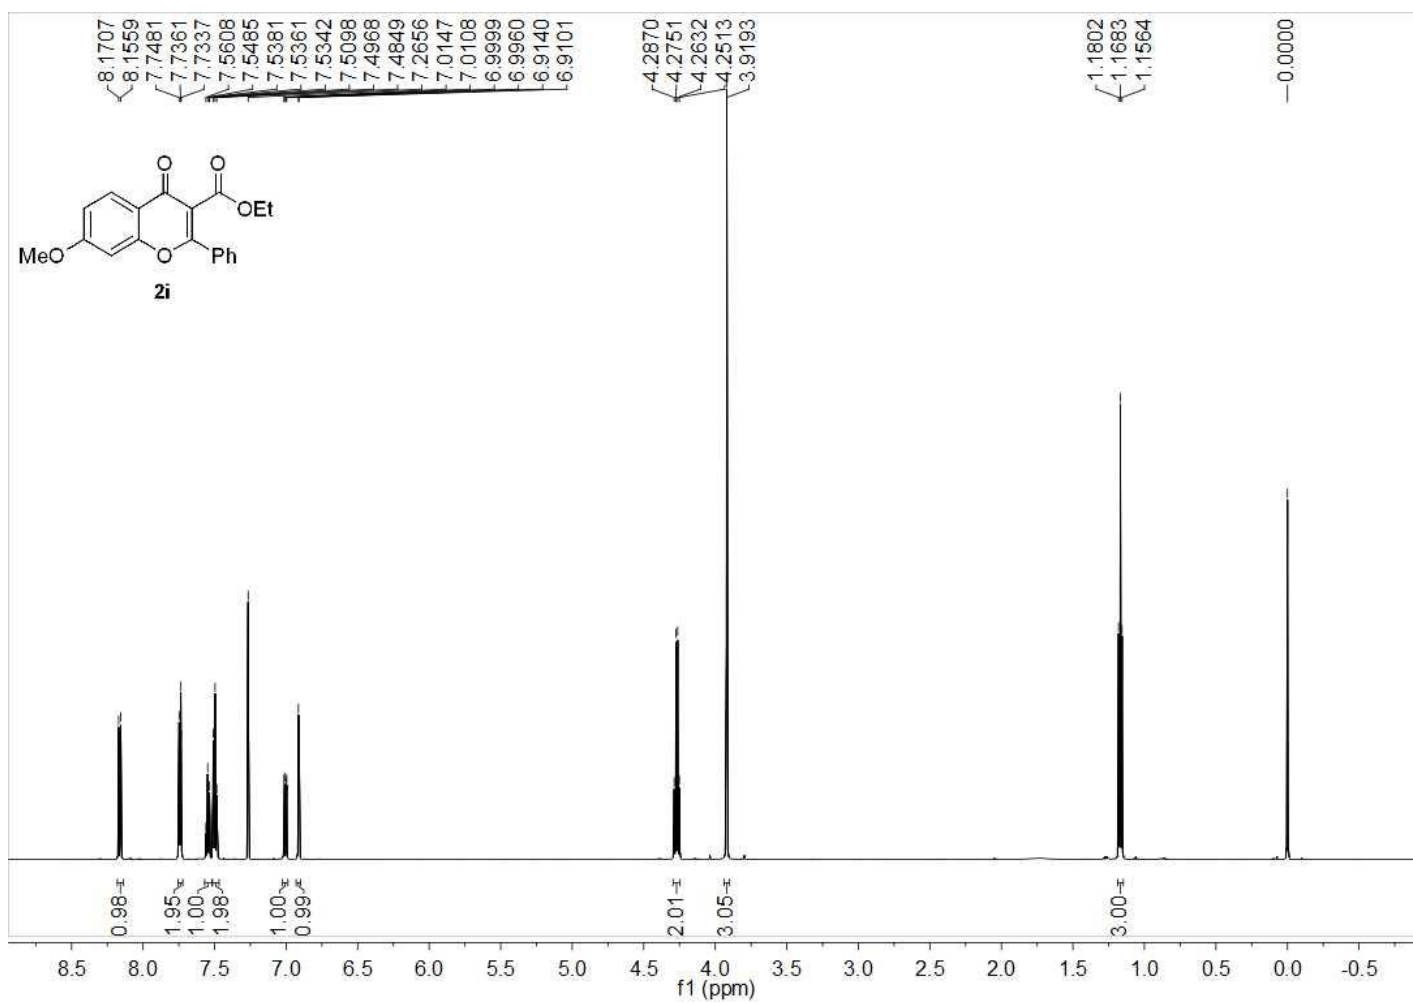

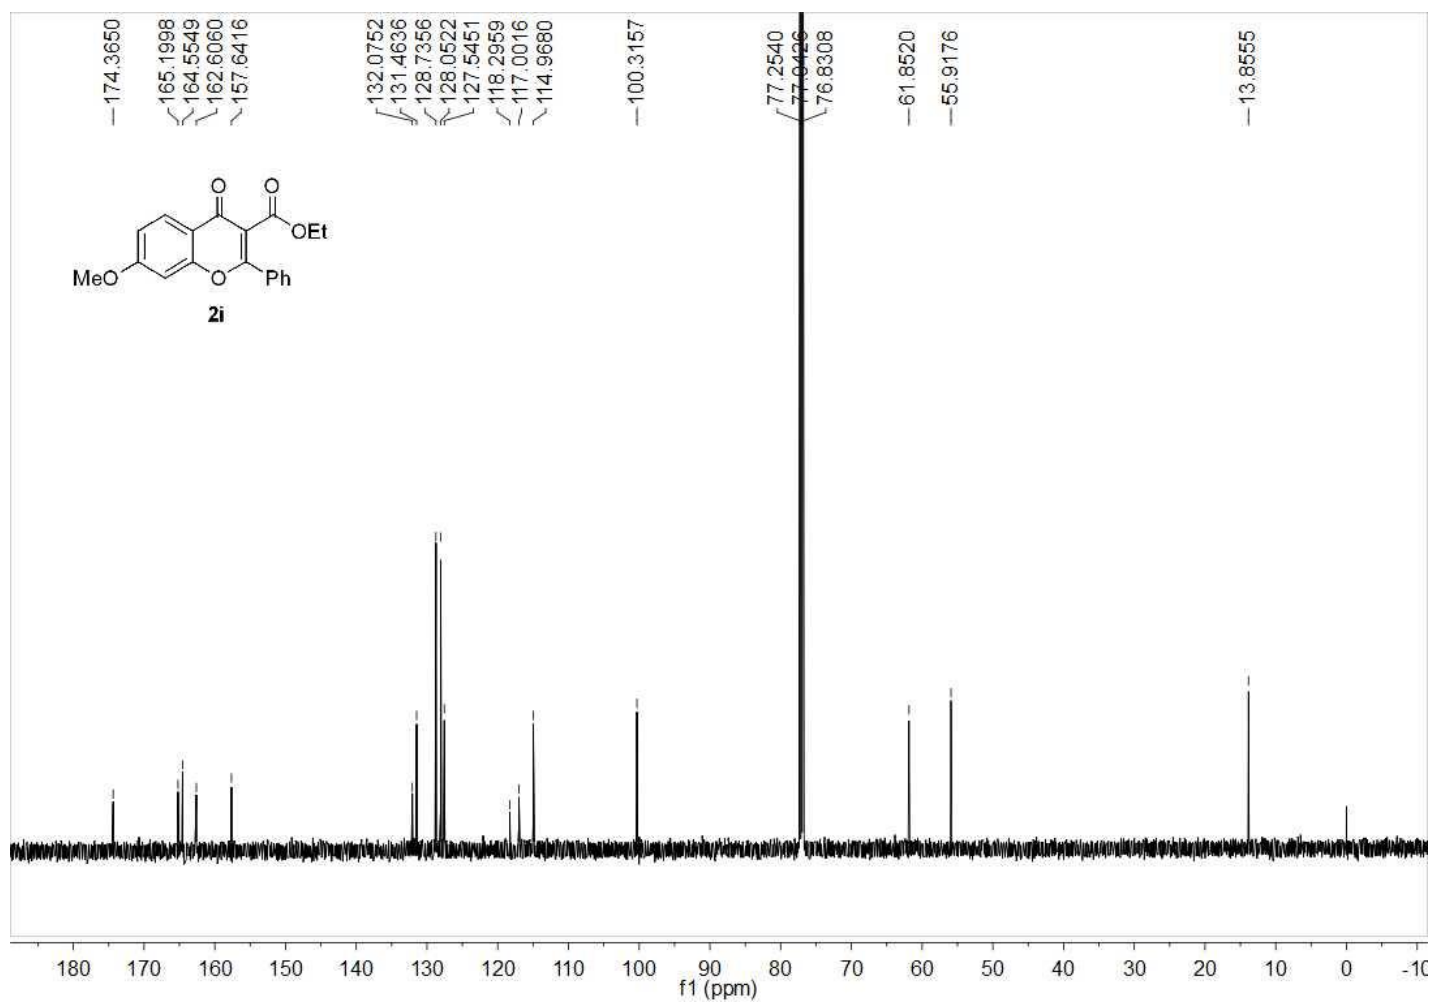



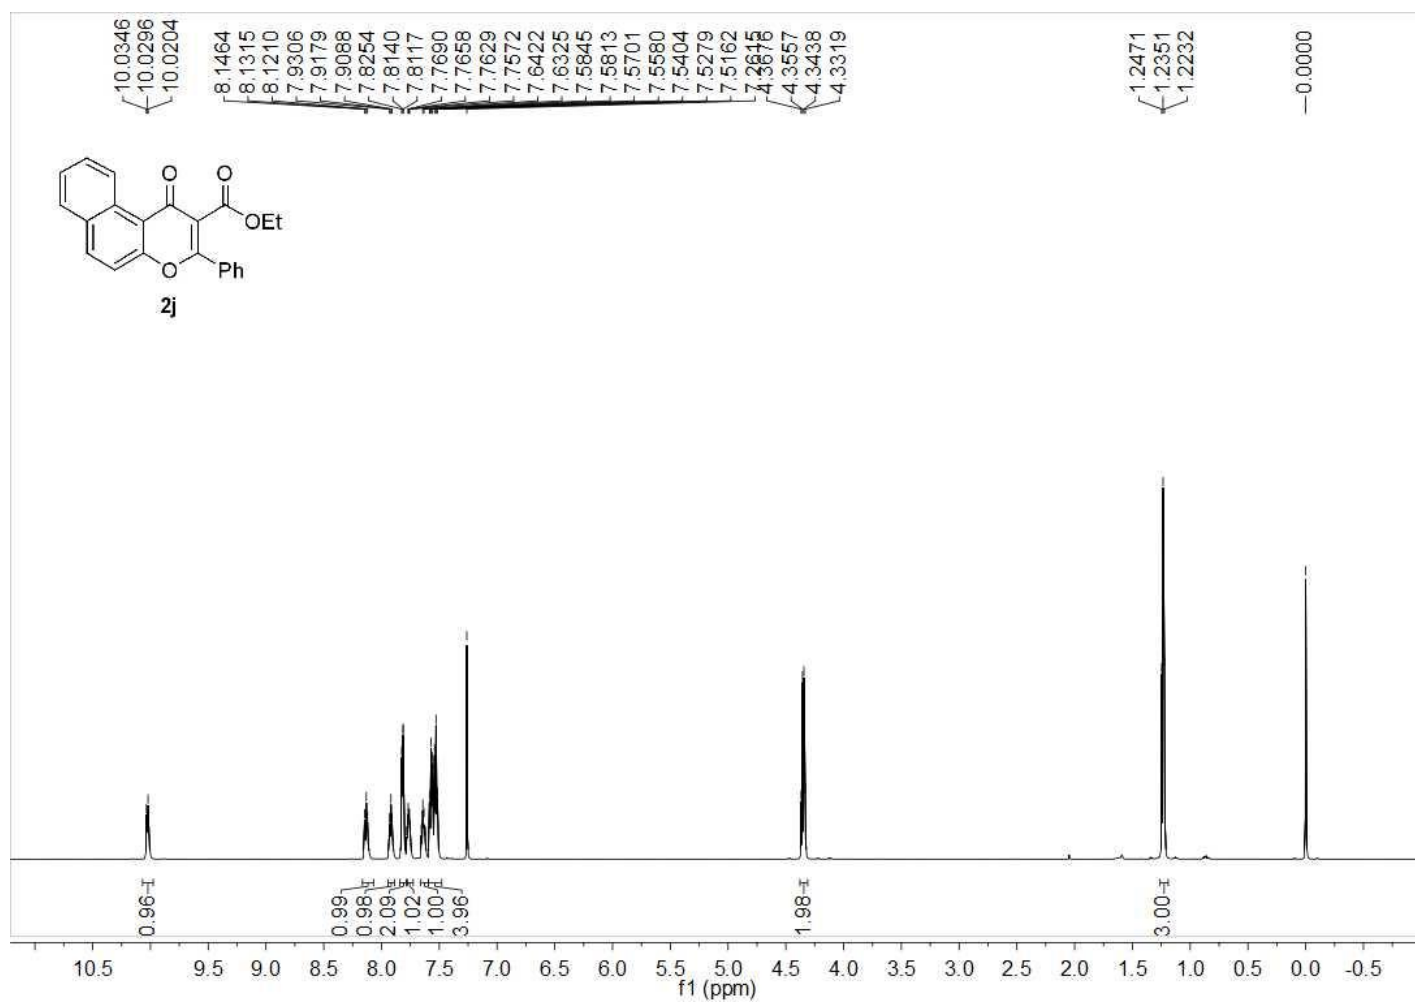

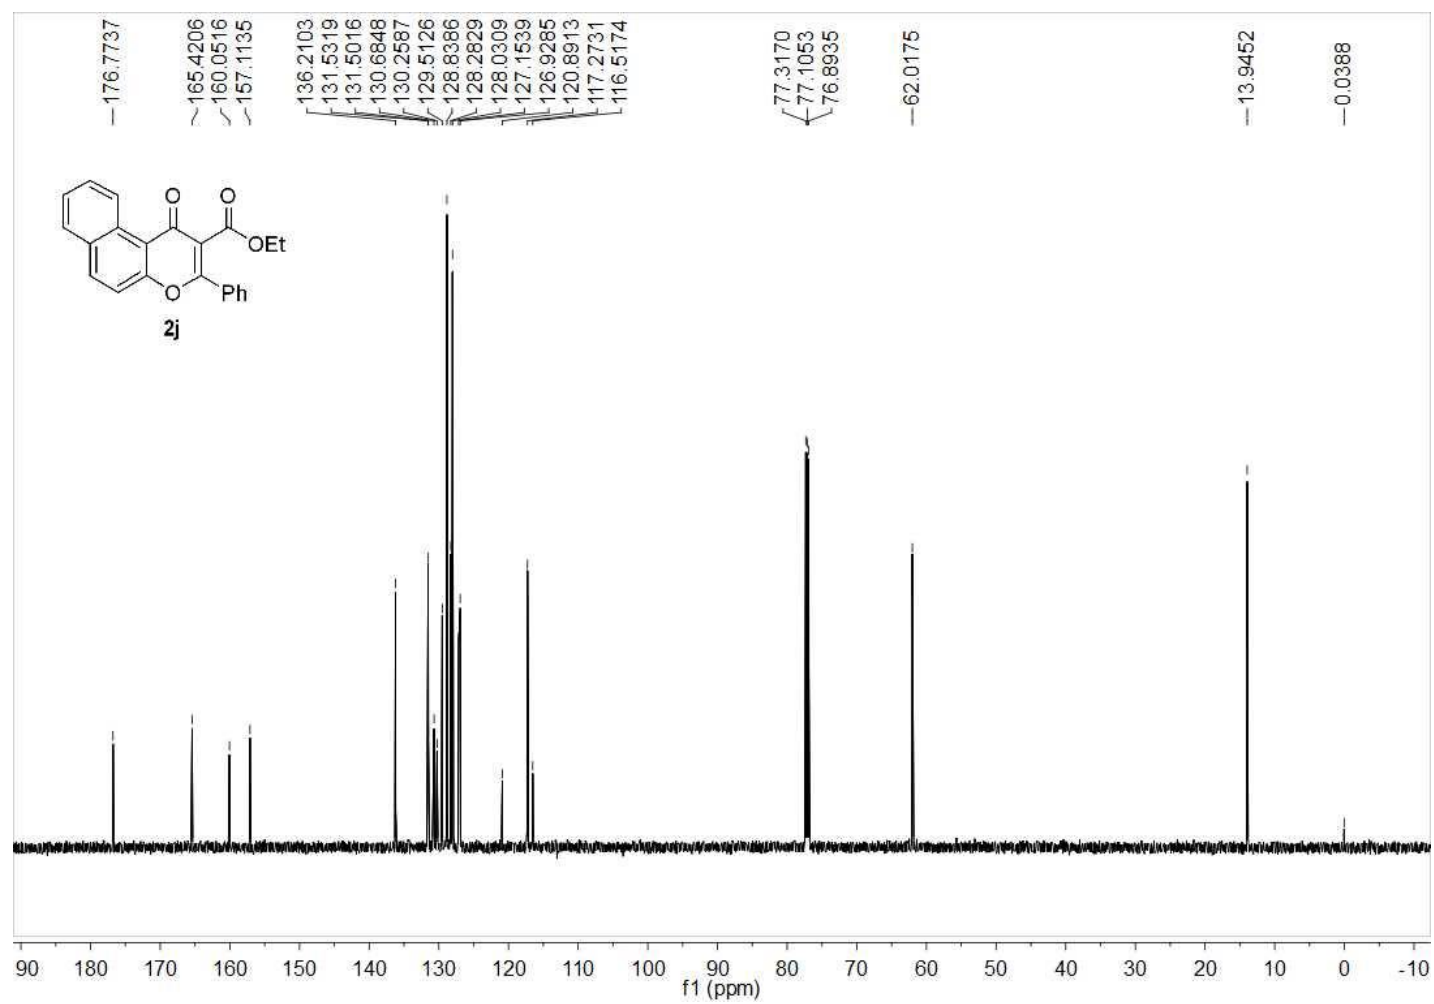

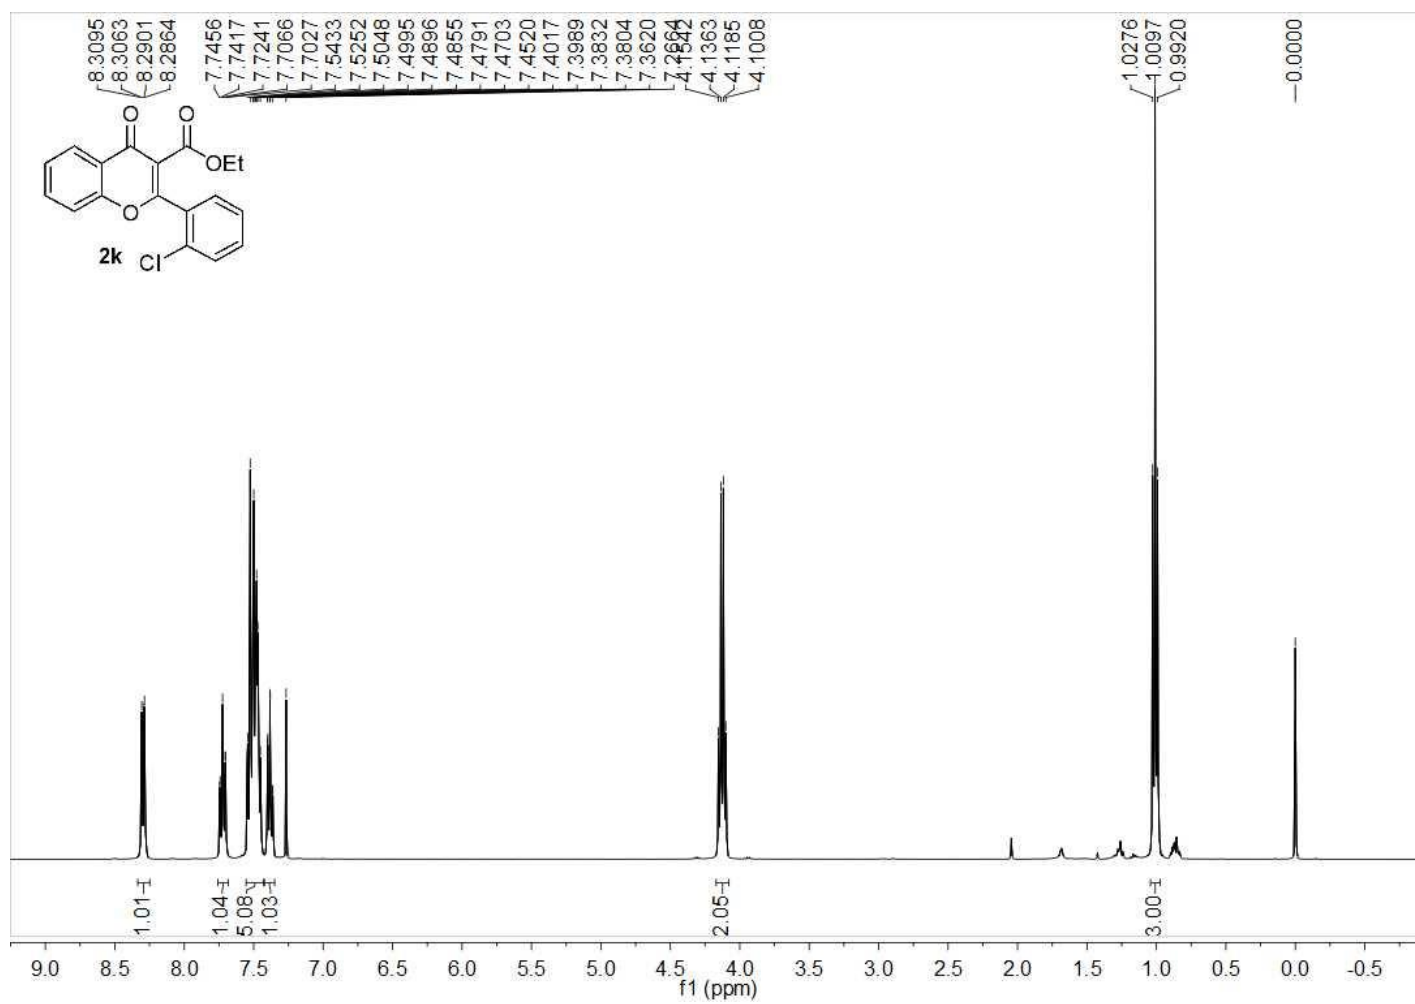

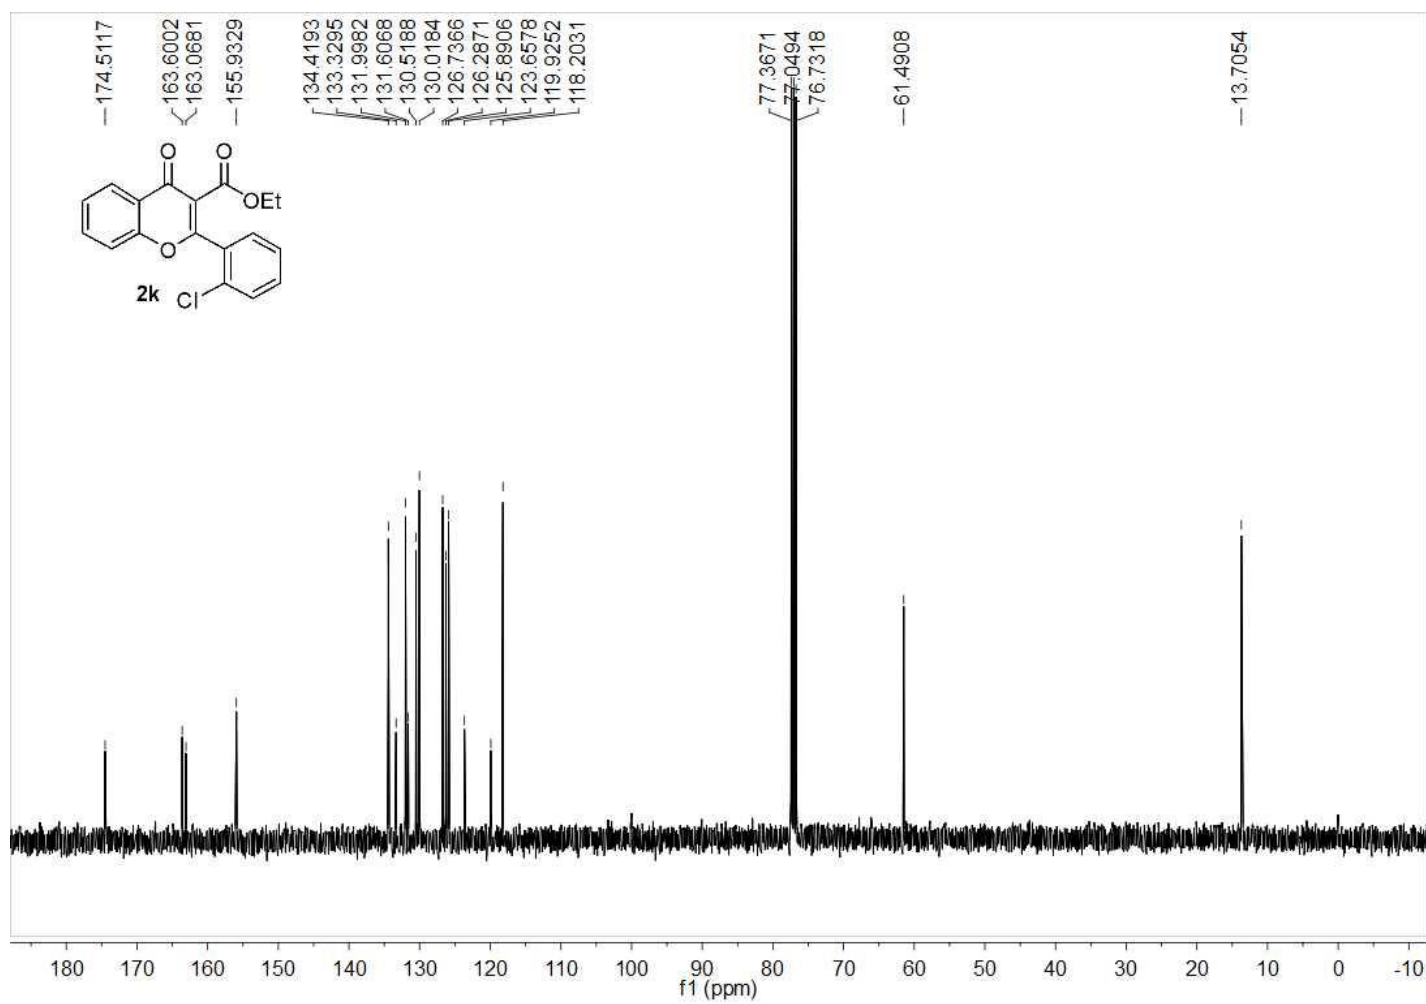

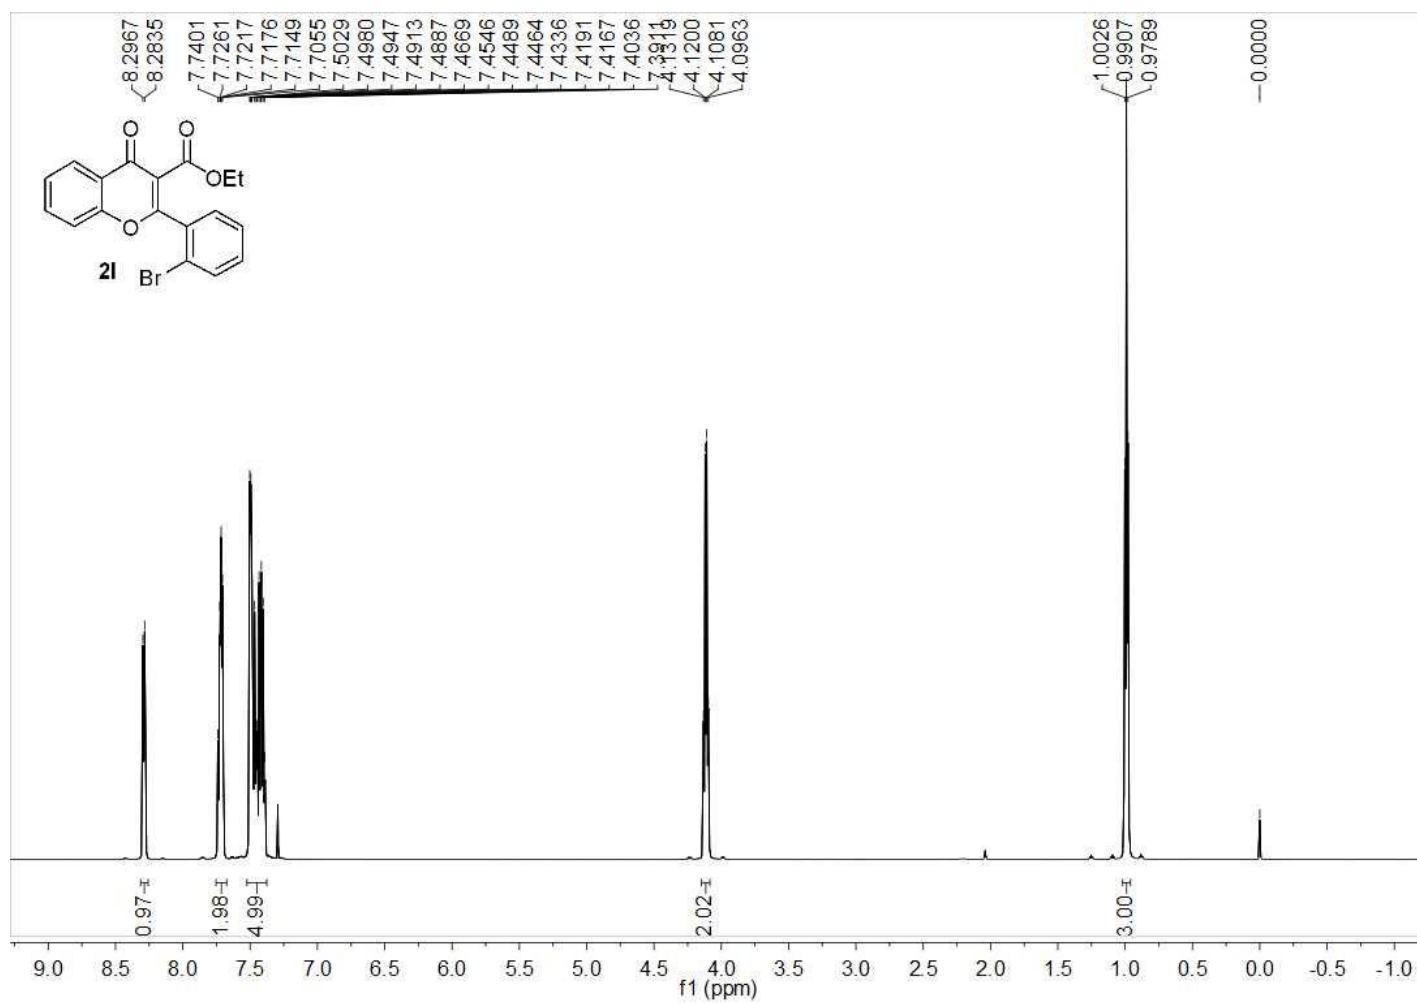

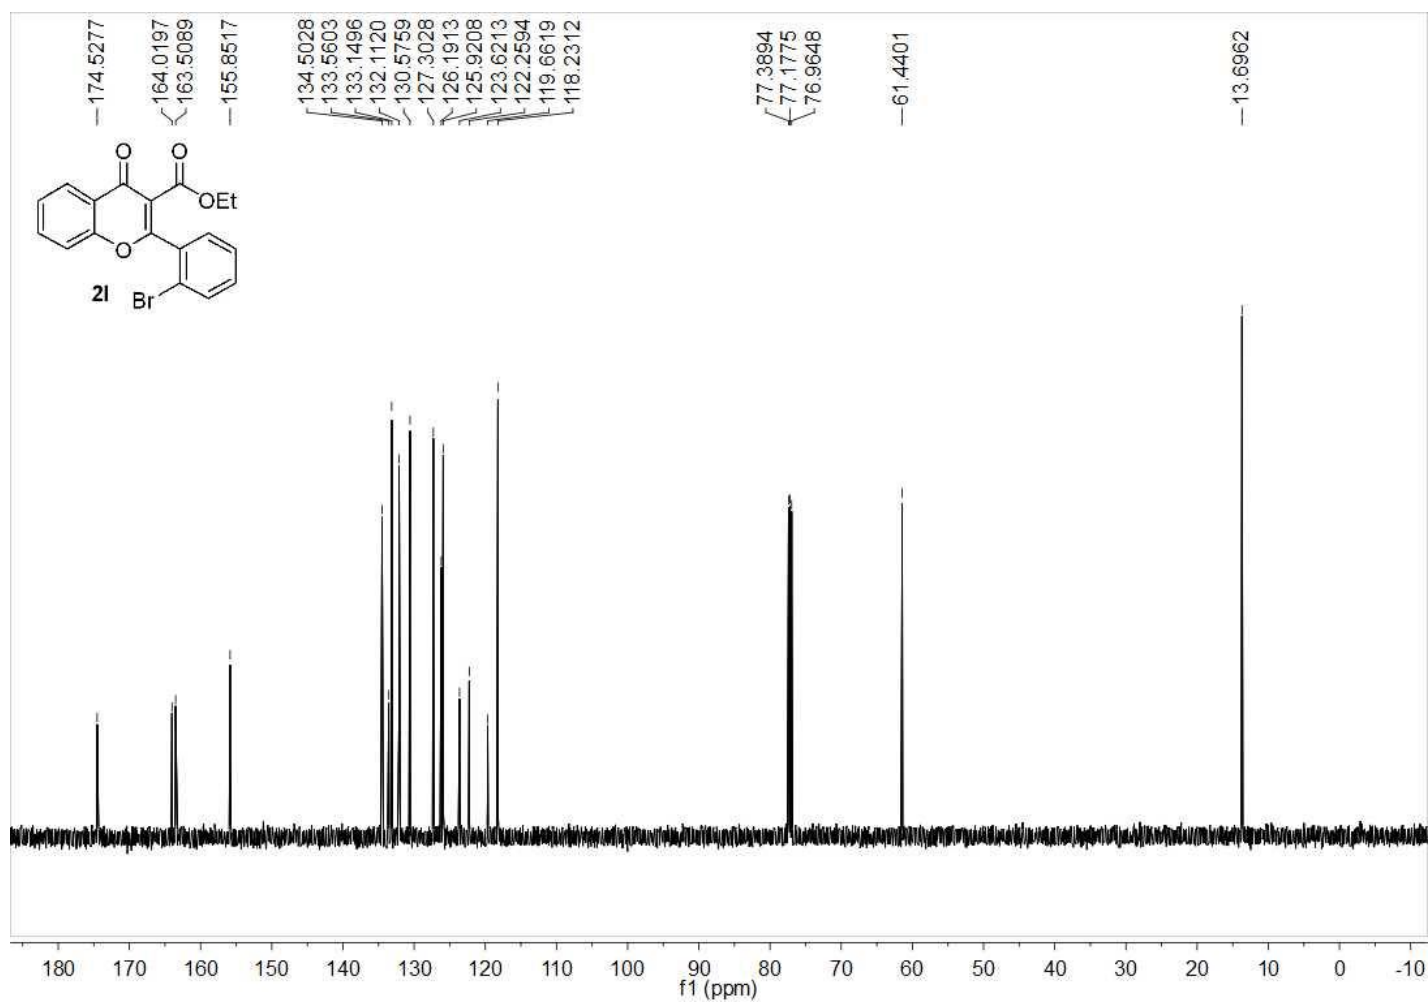

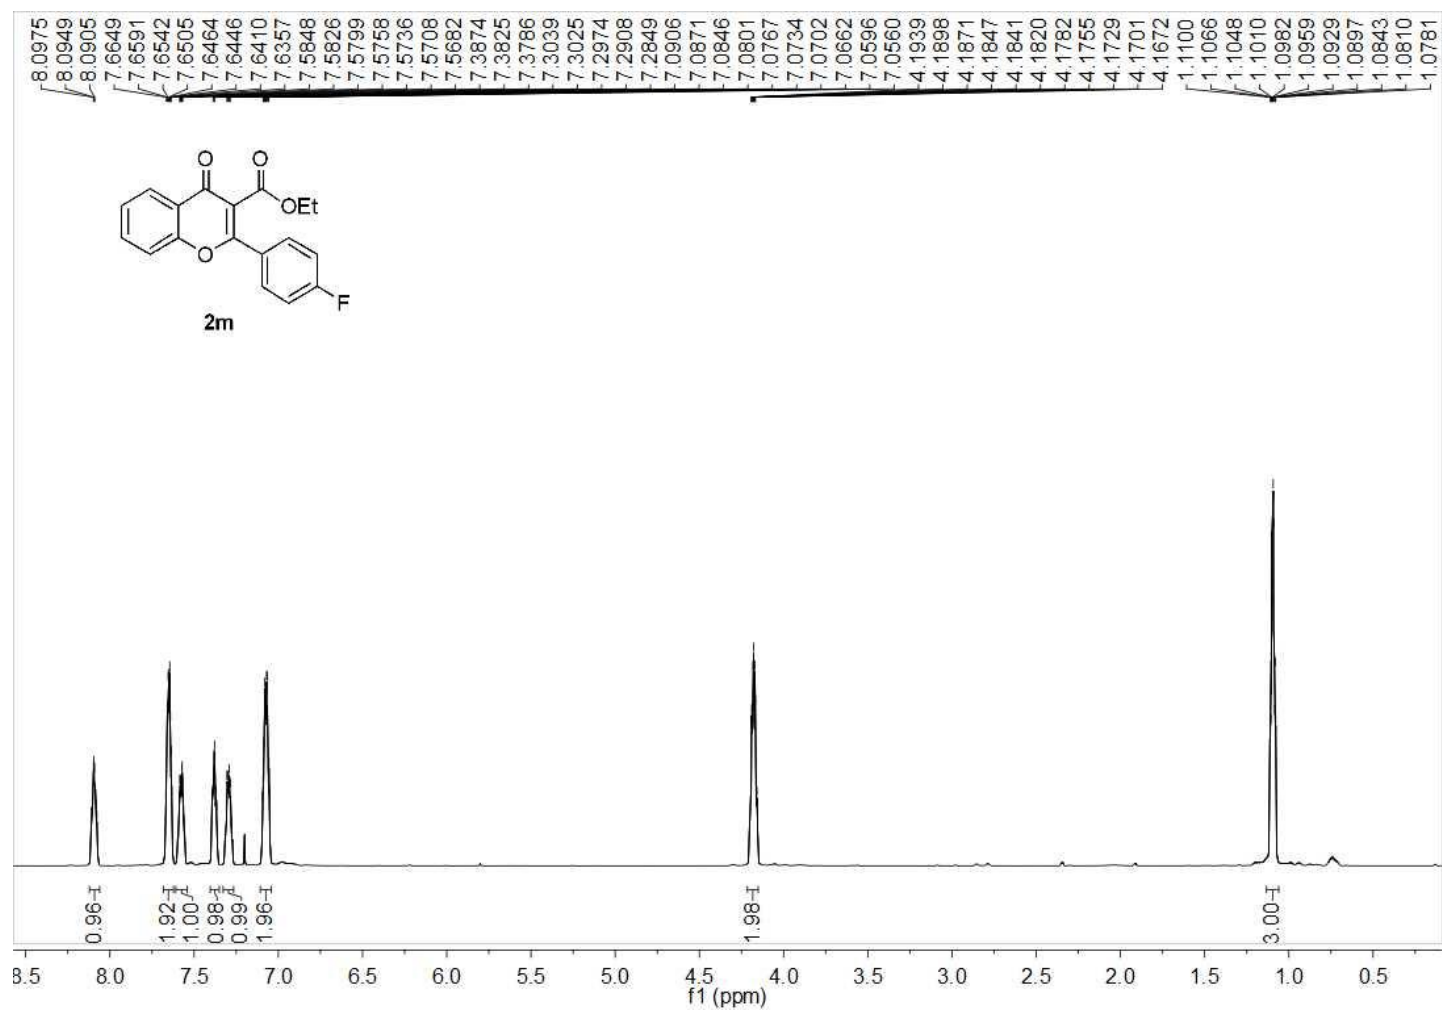

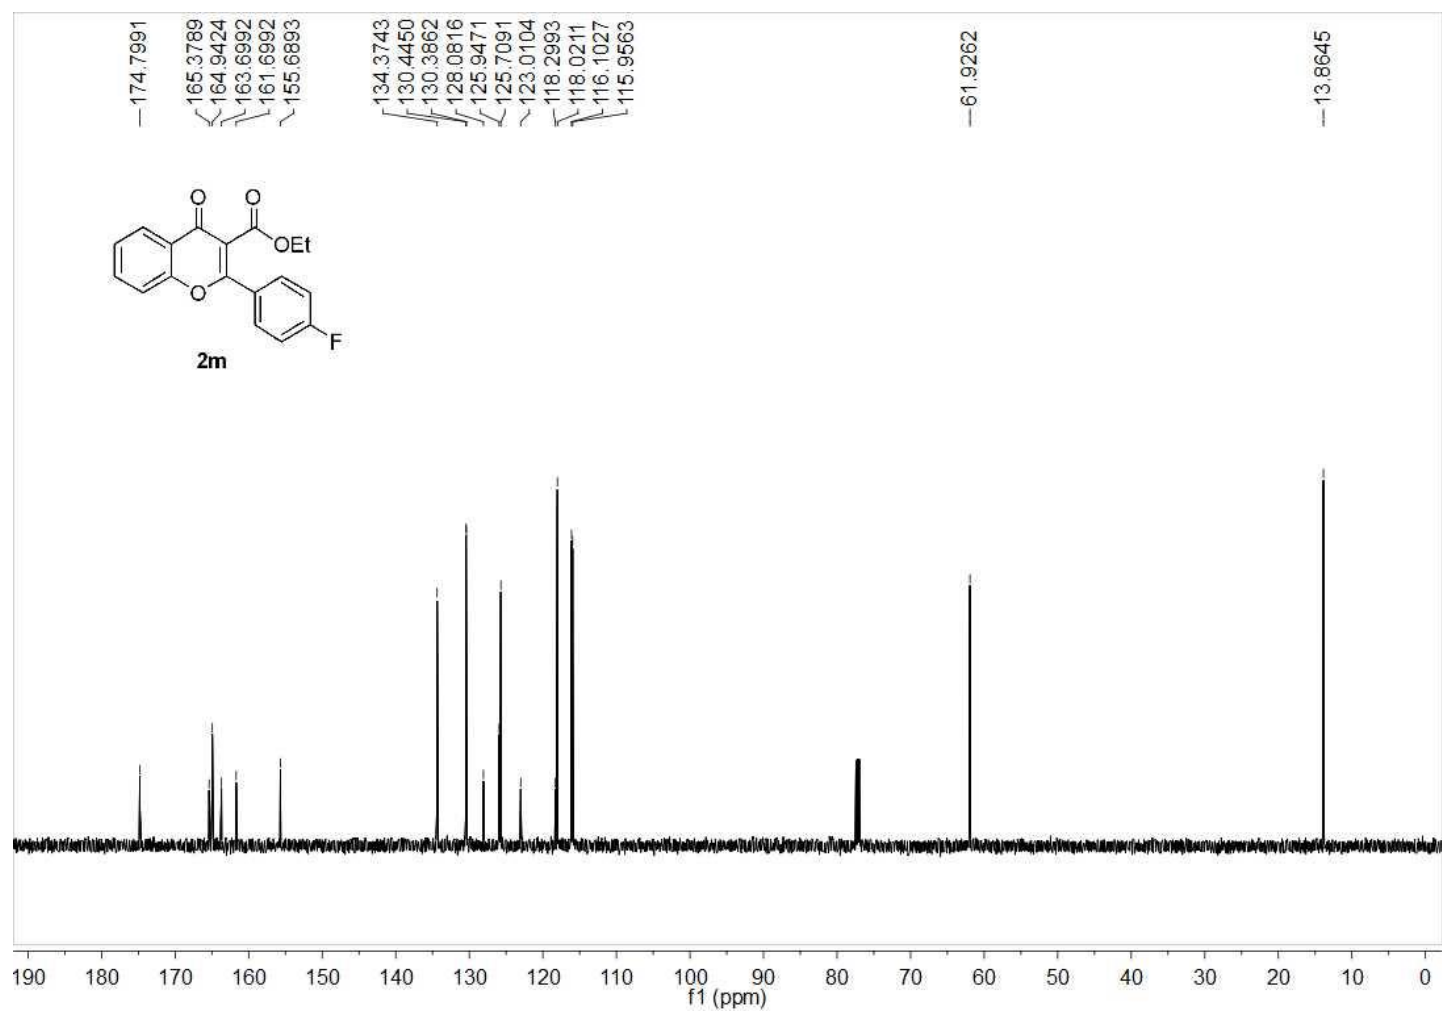



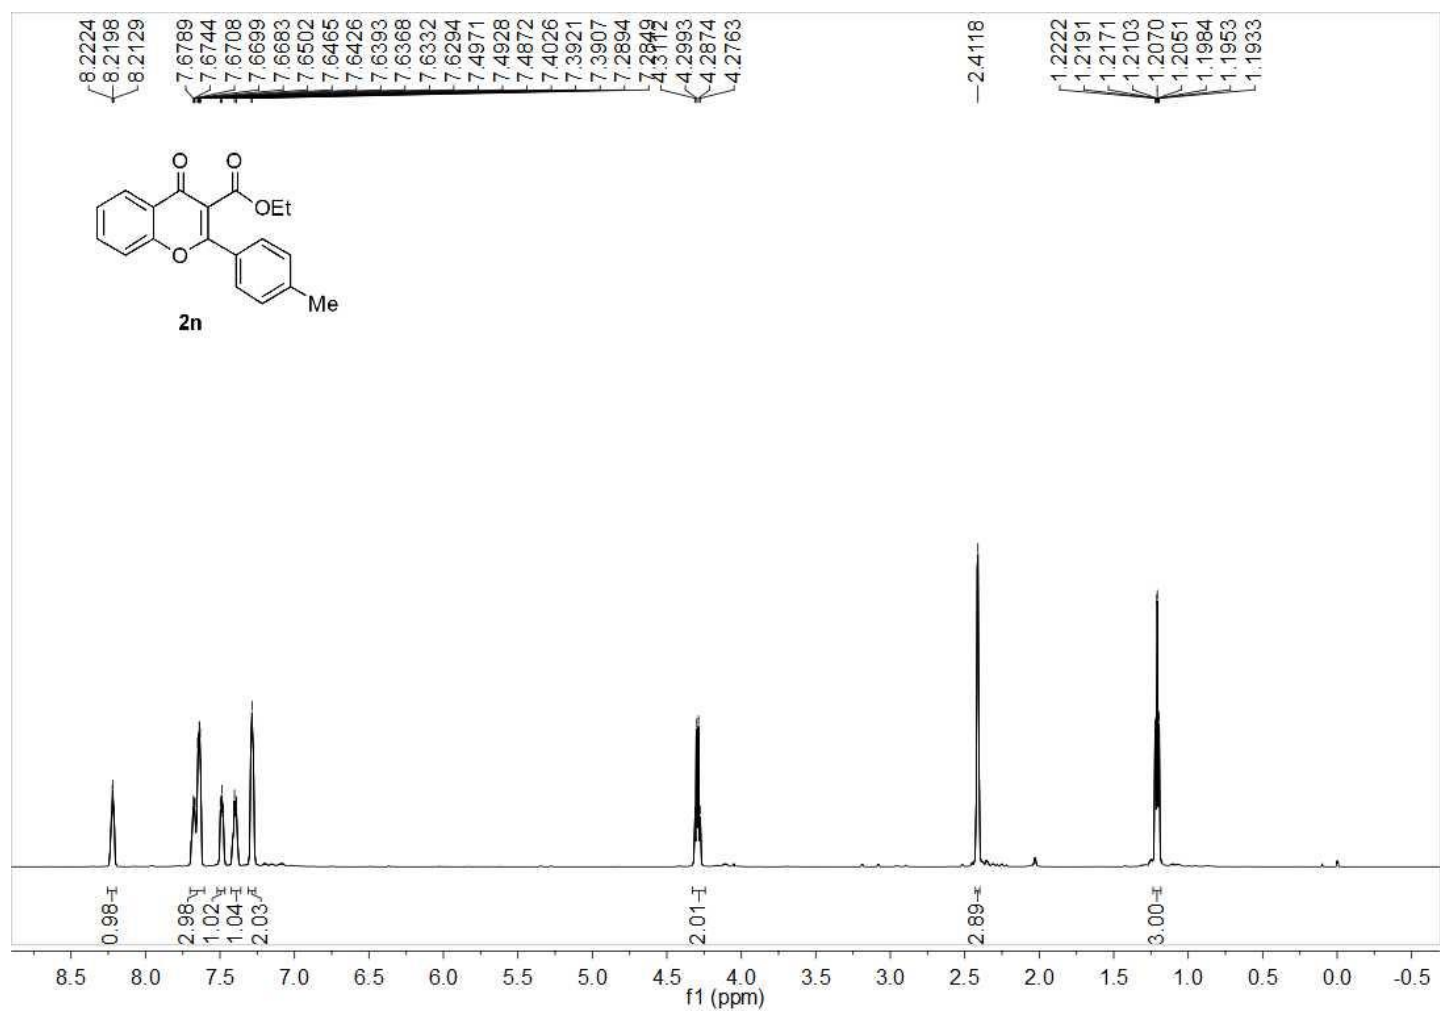

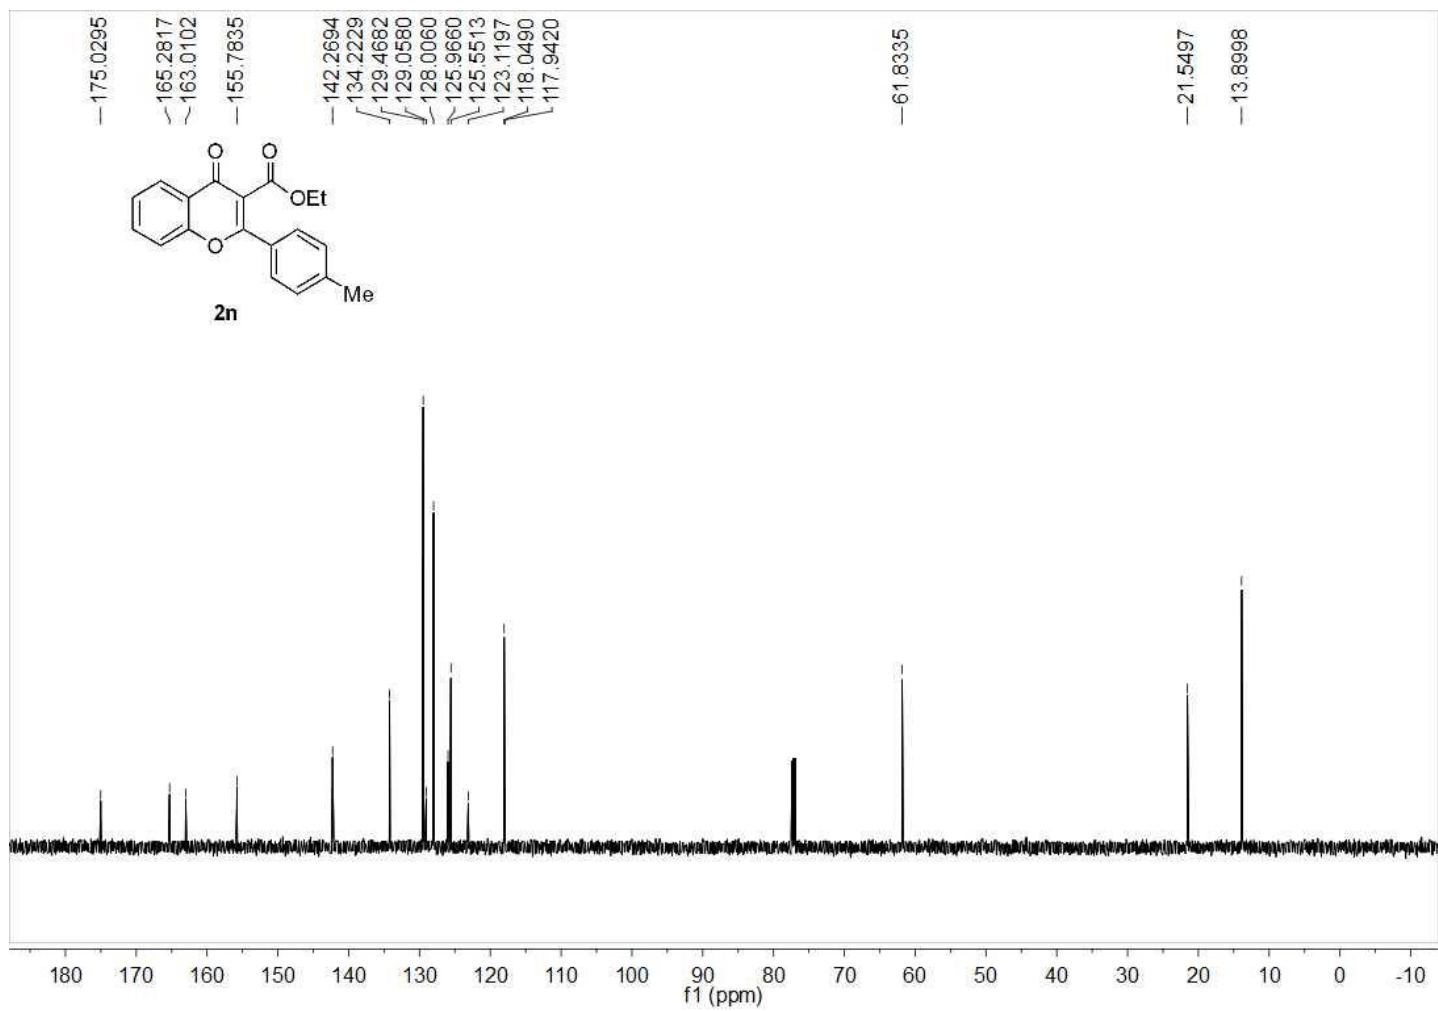

S113

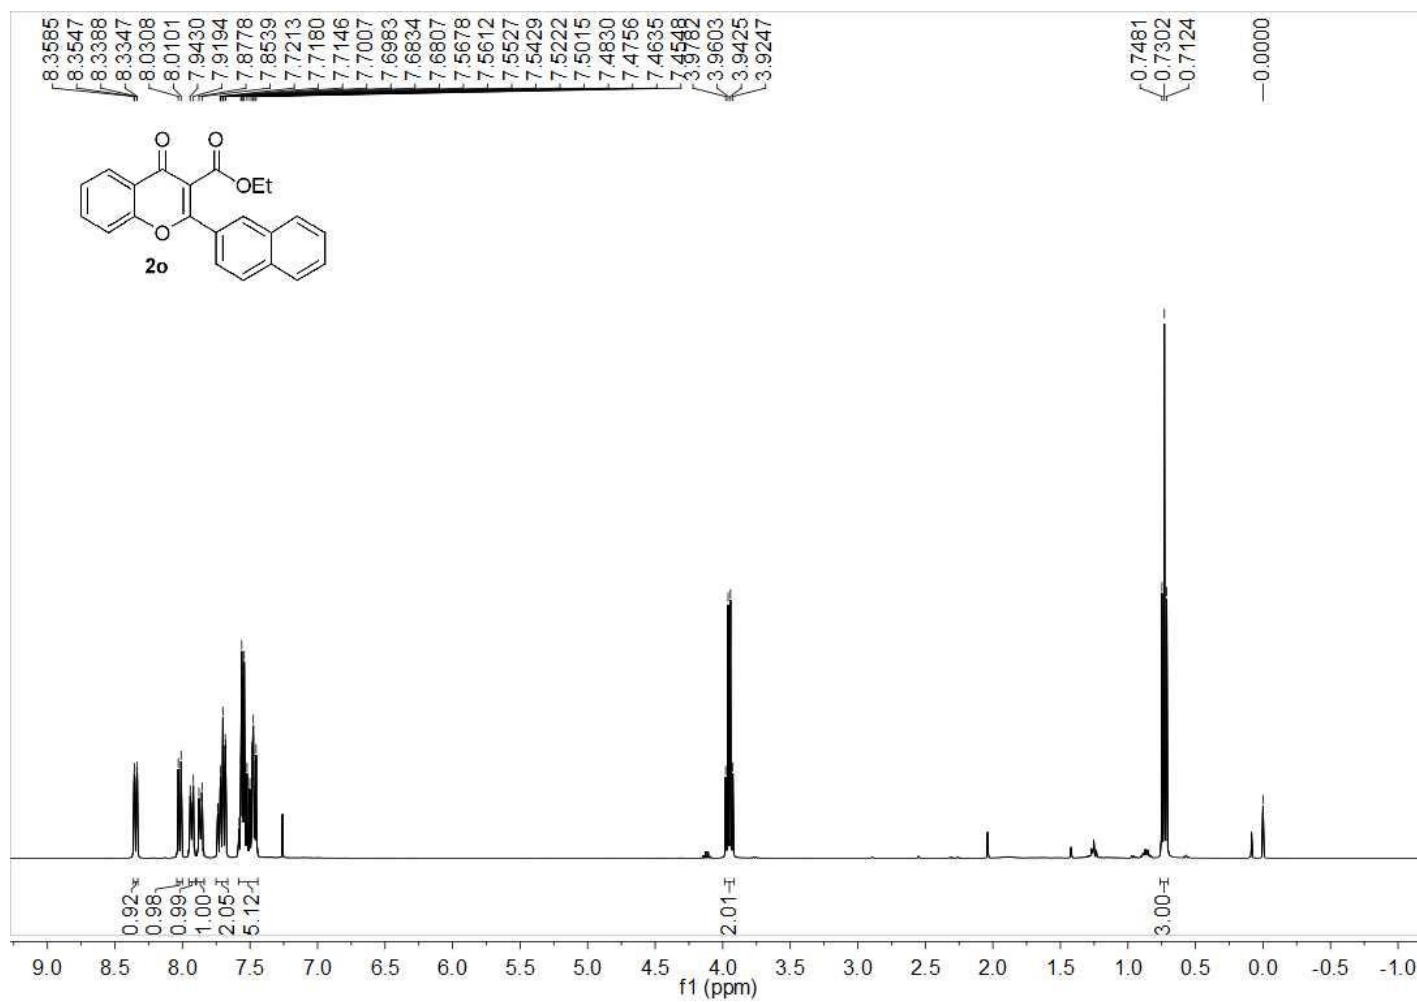

S114

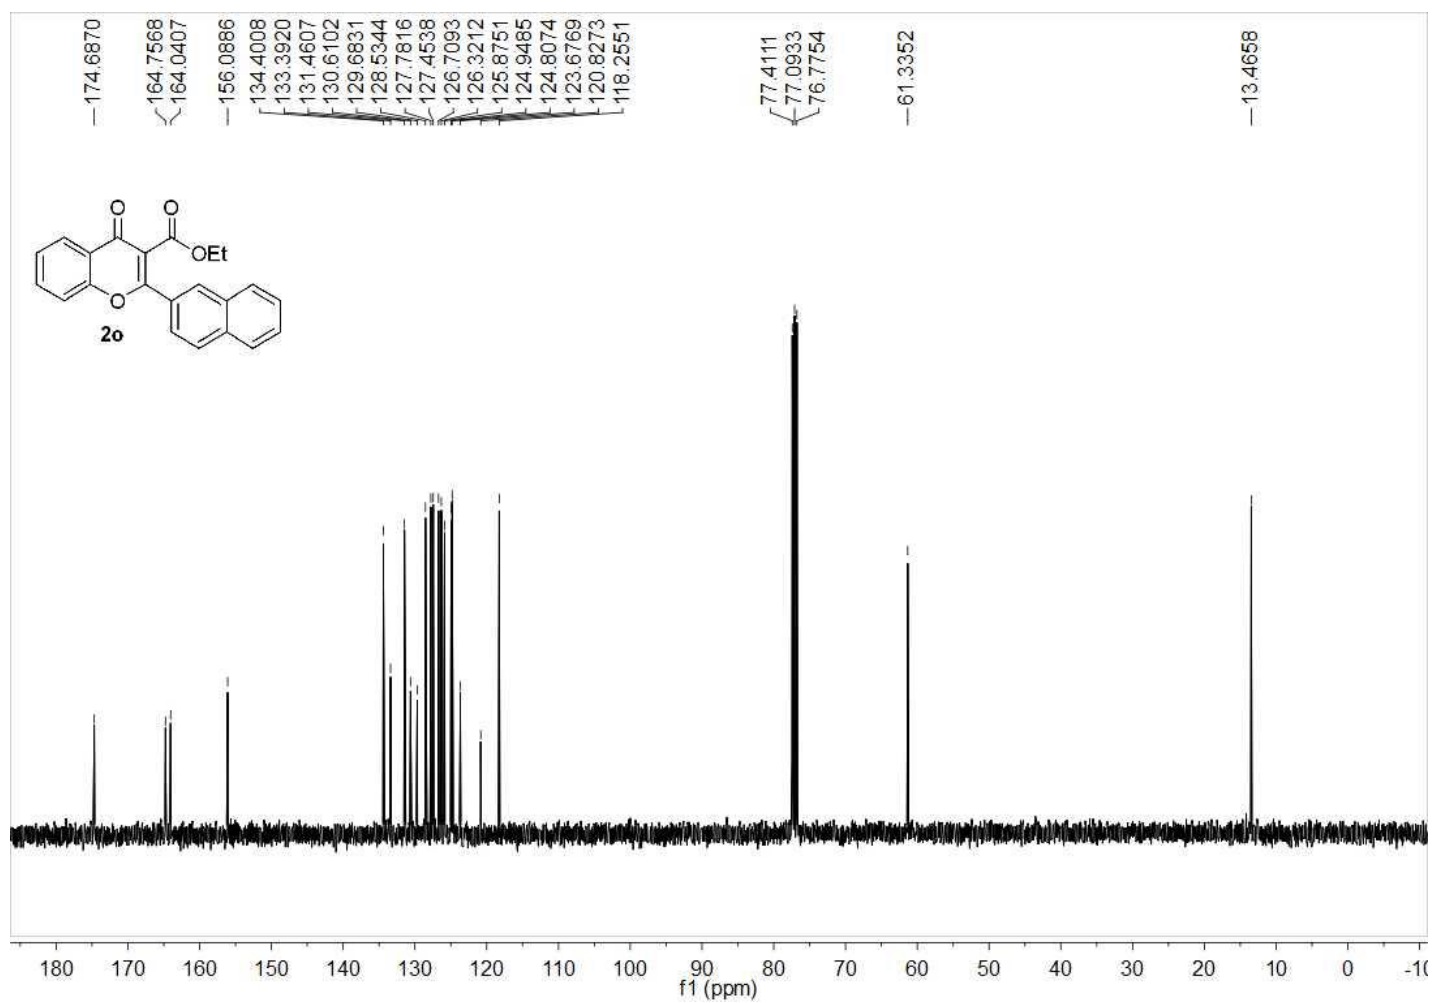

S115

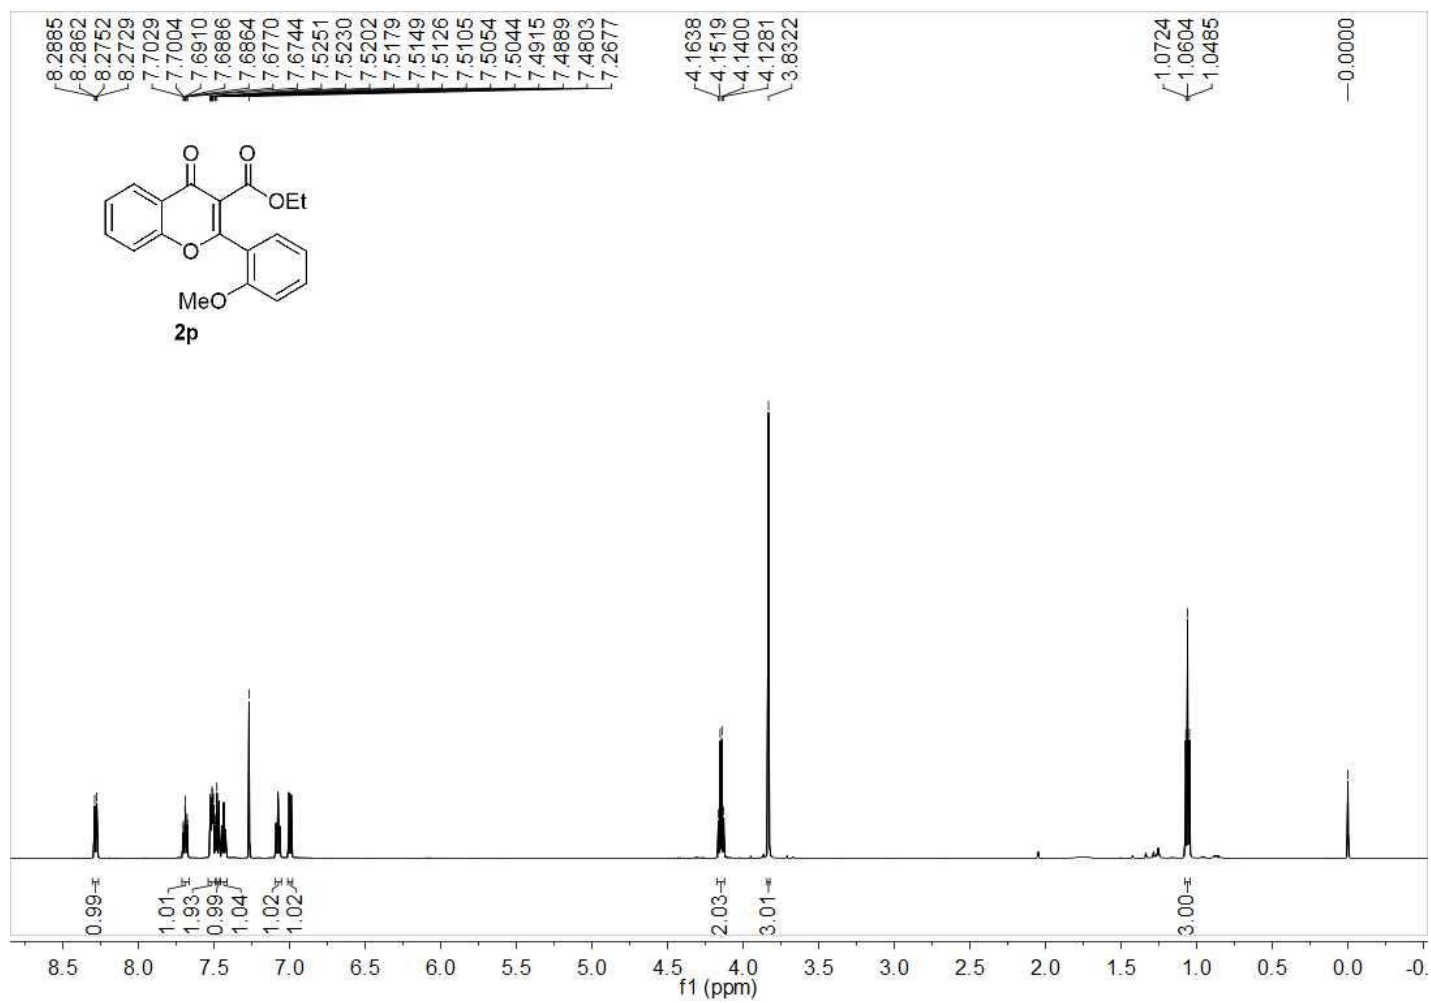

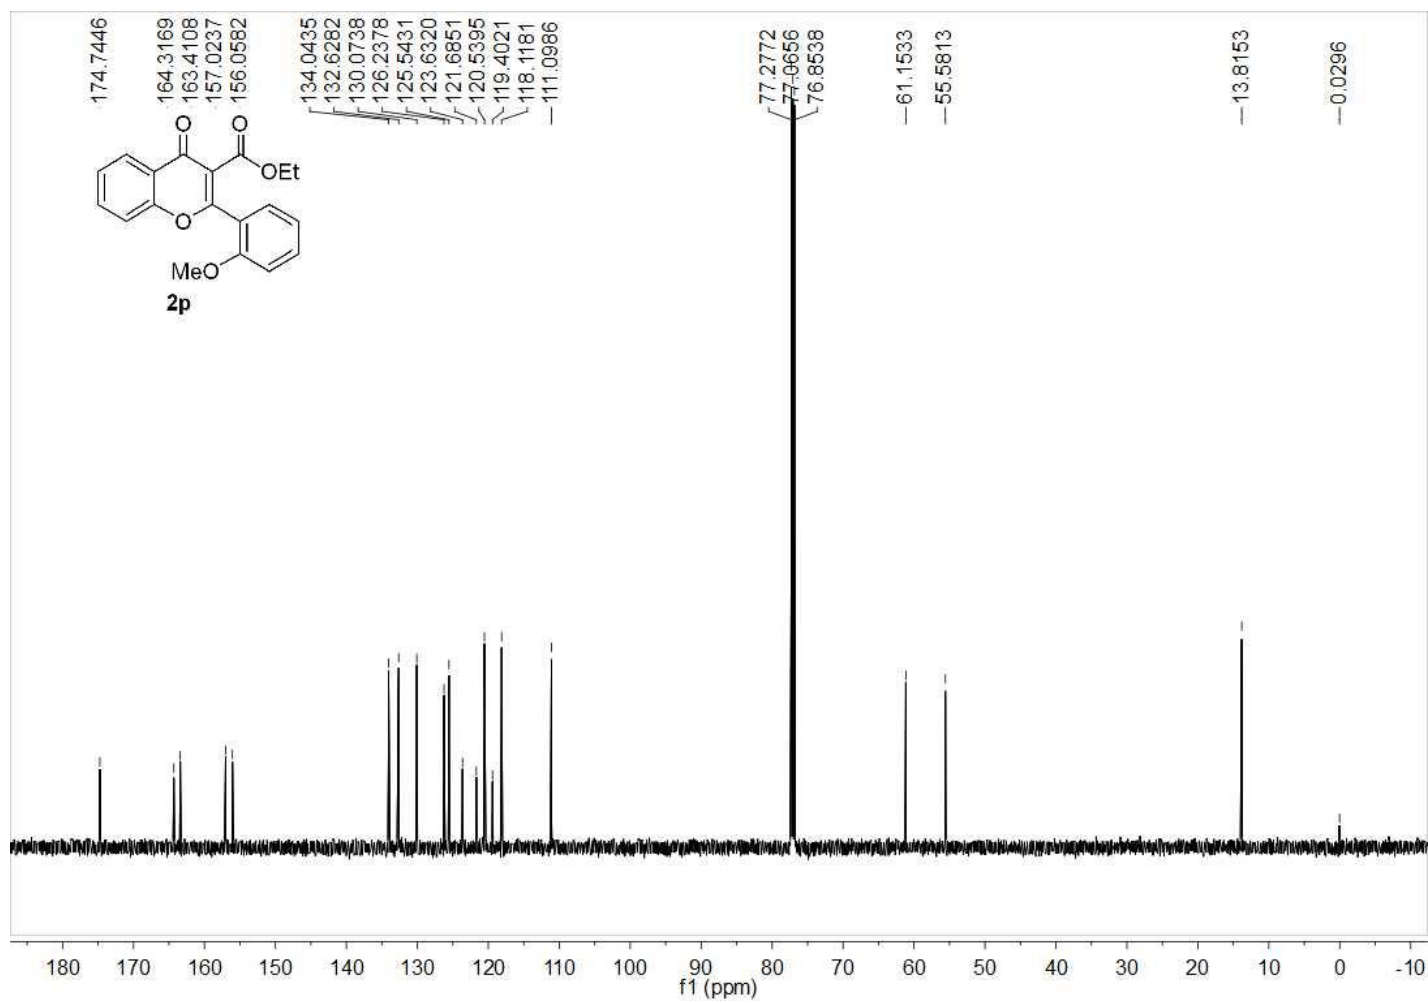

S117

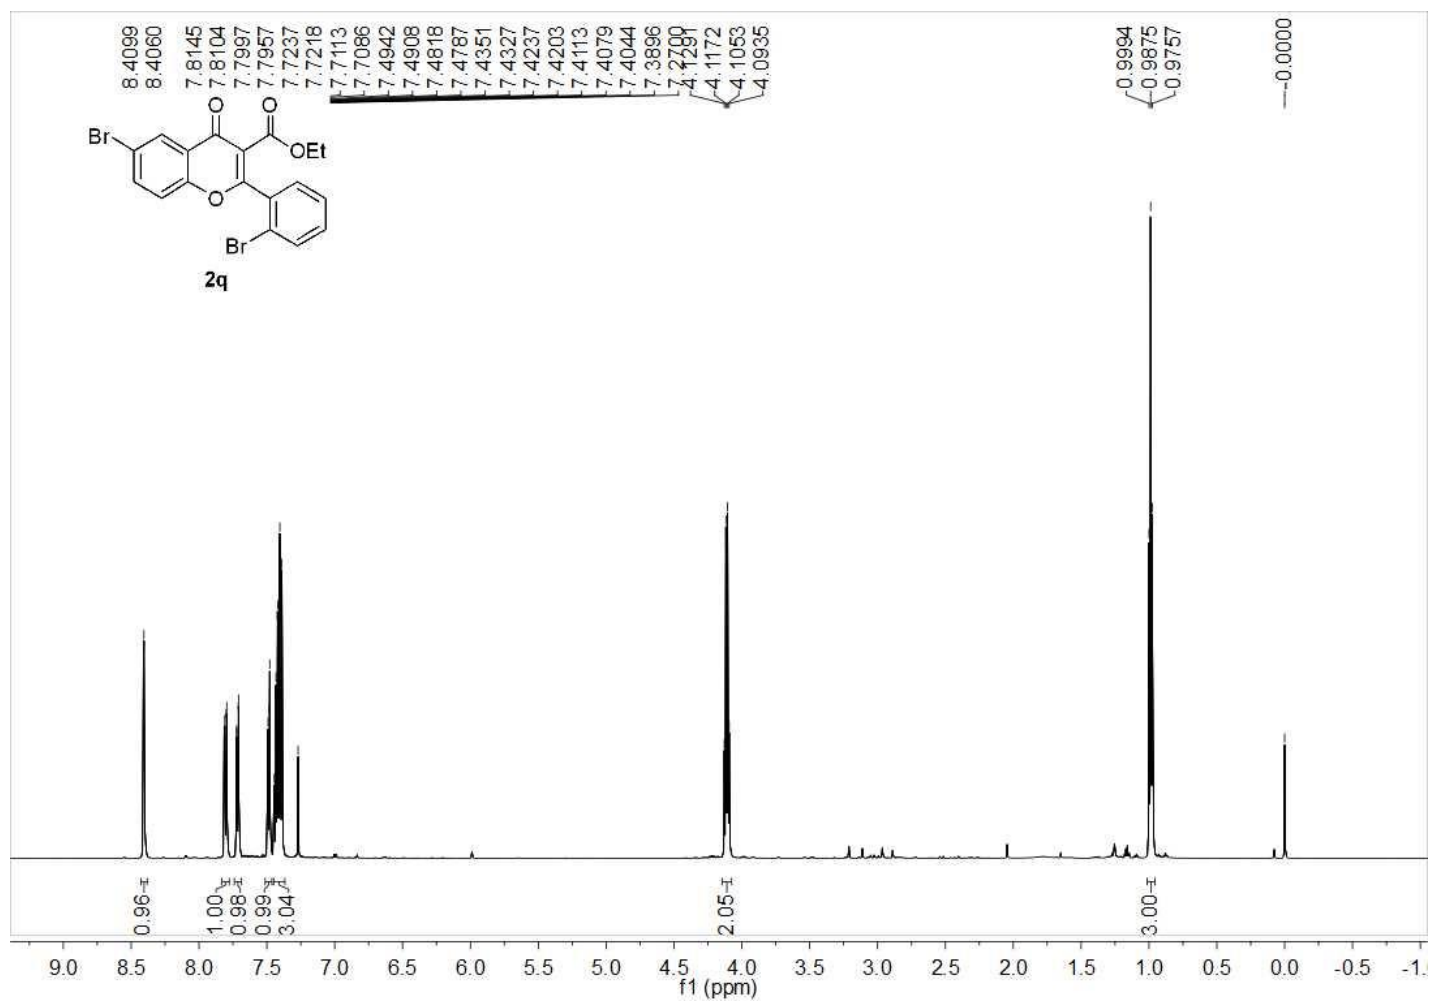

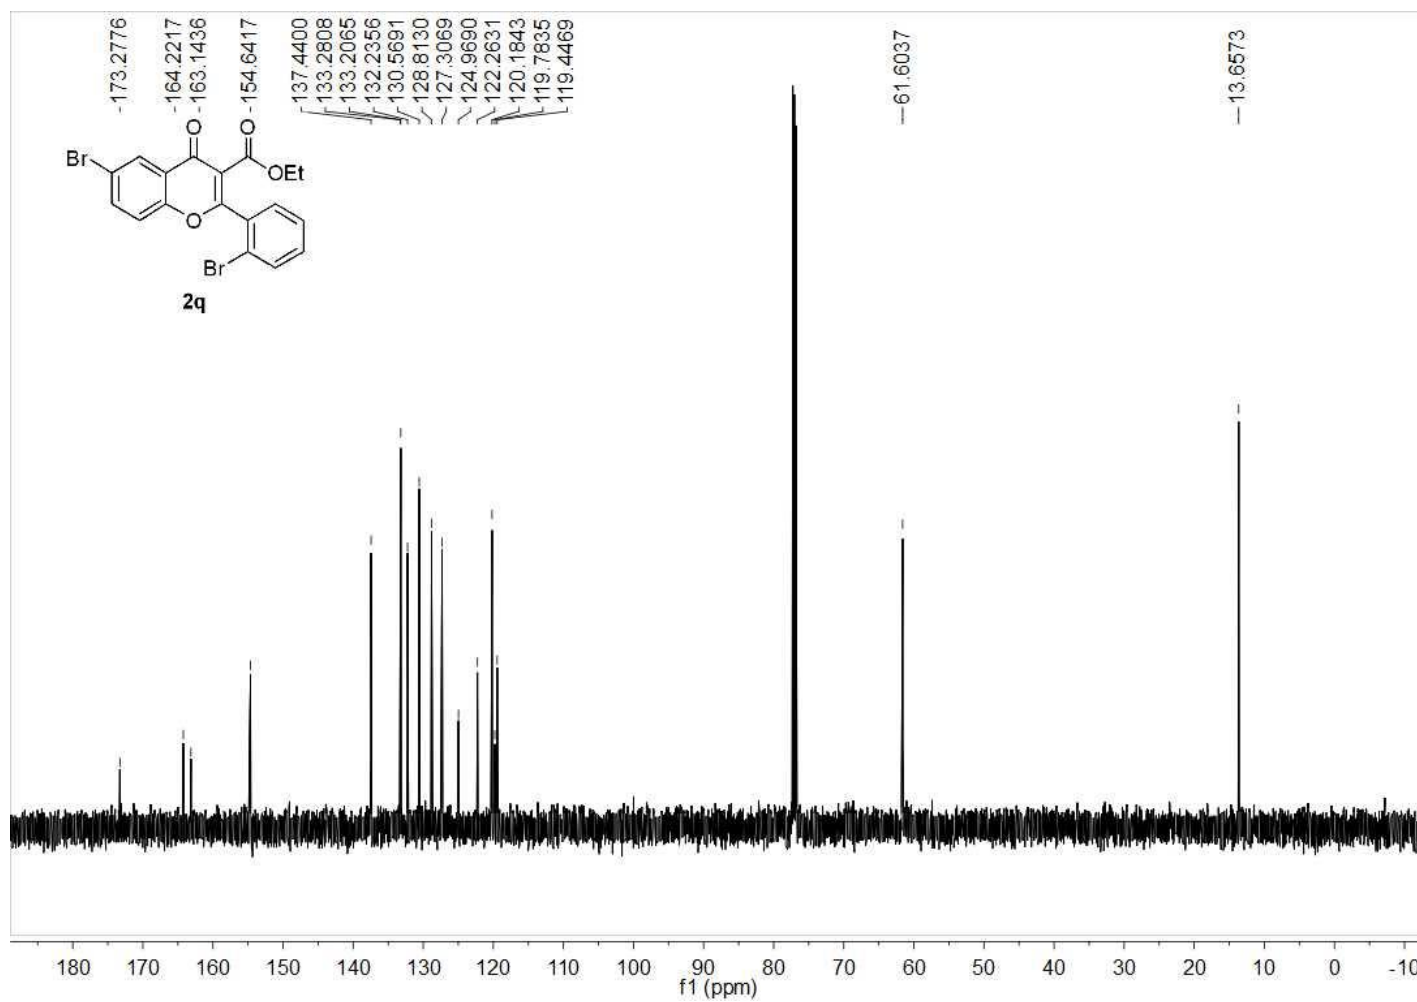



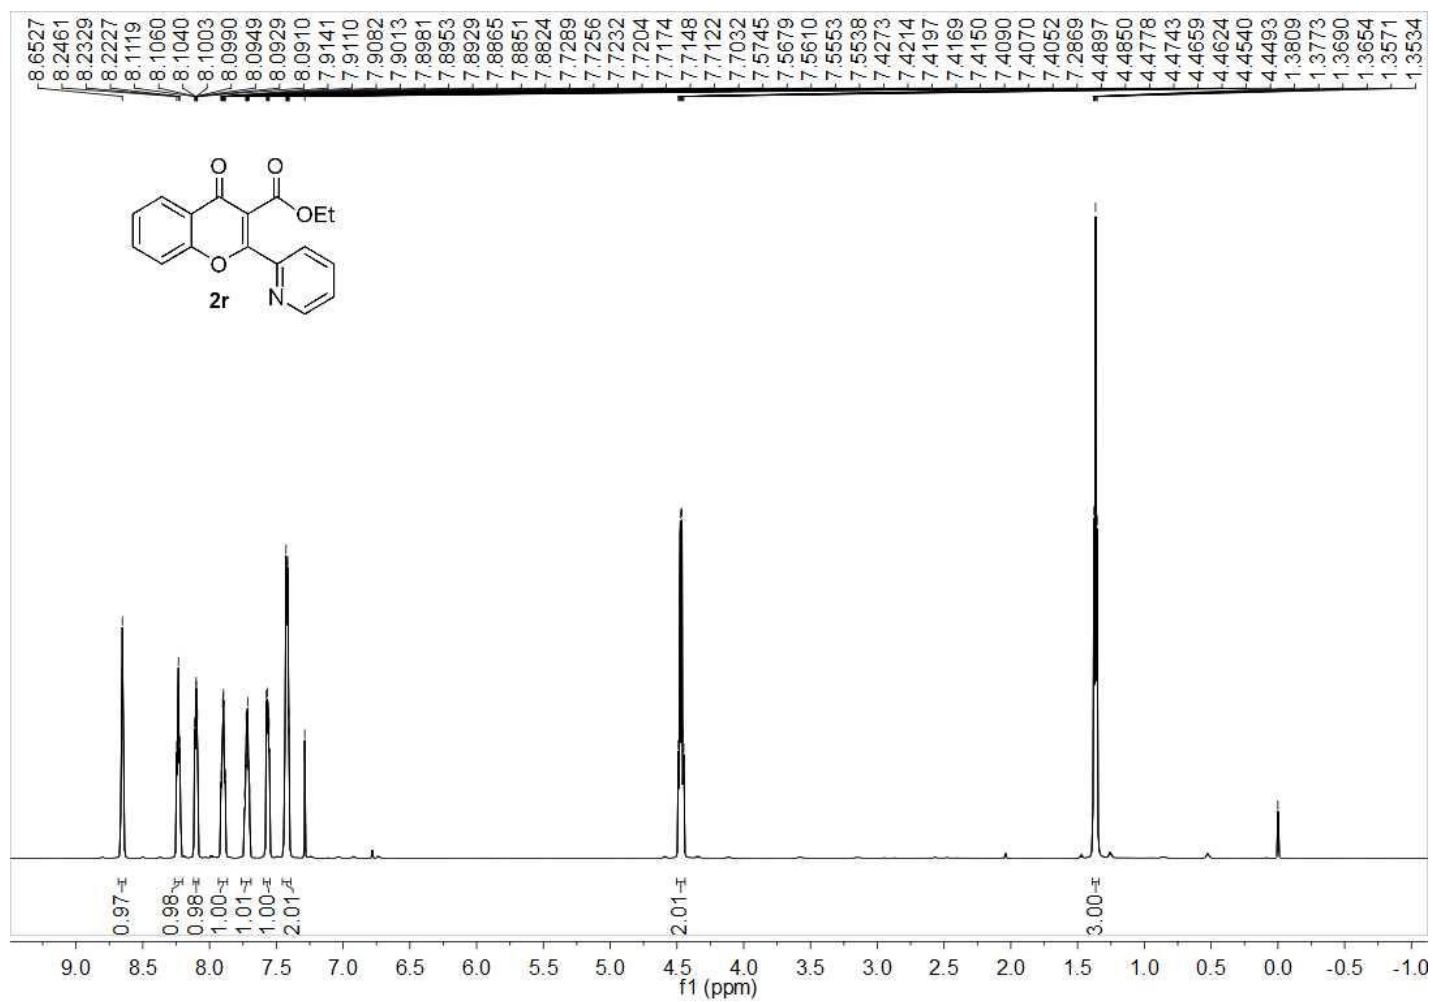

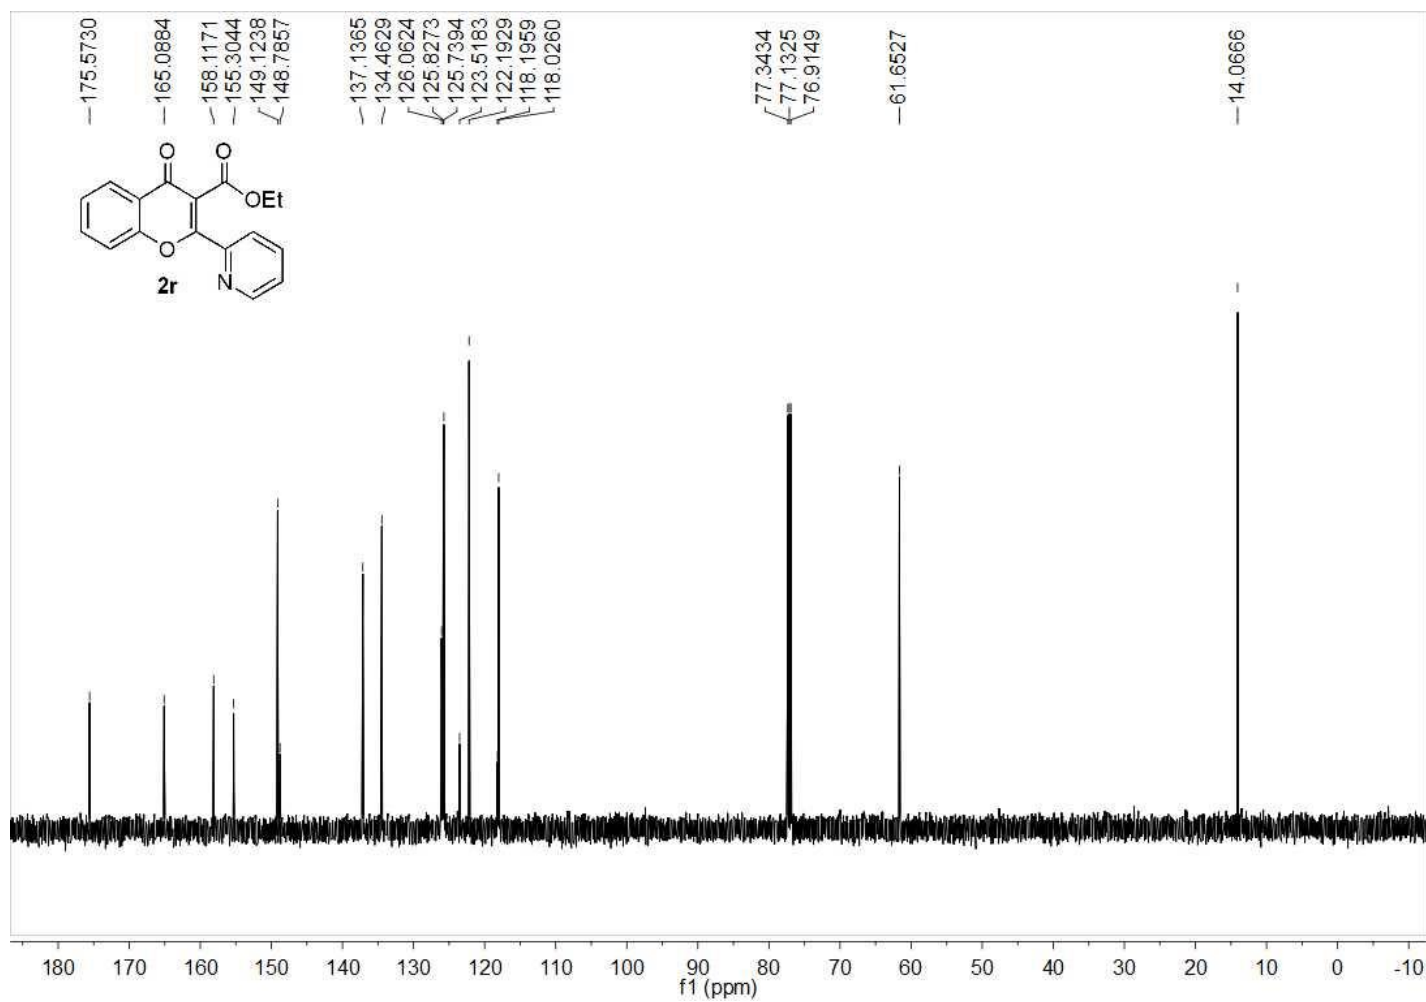

S121

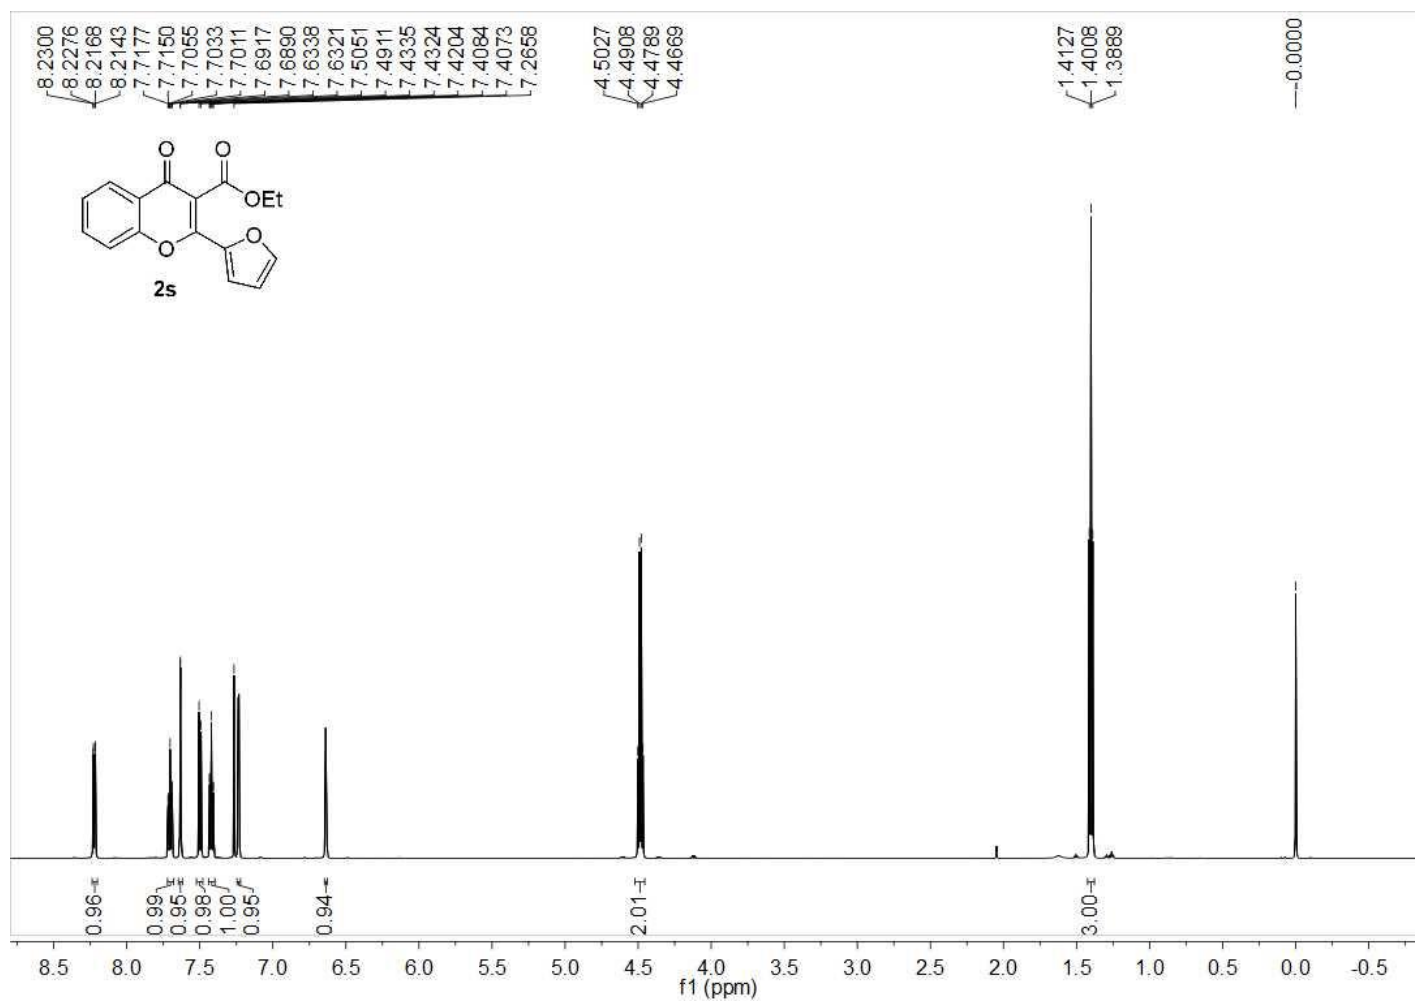

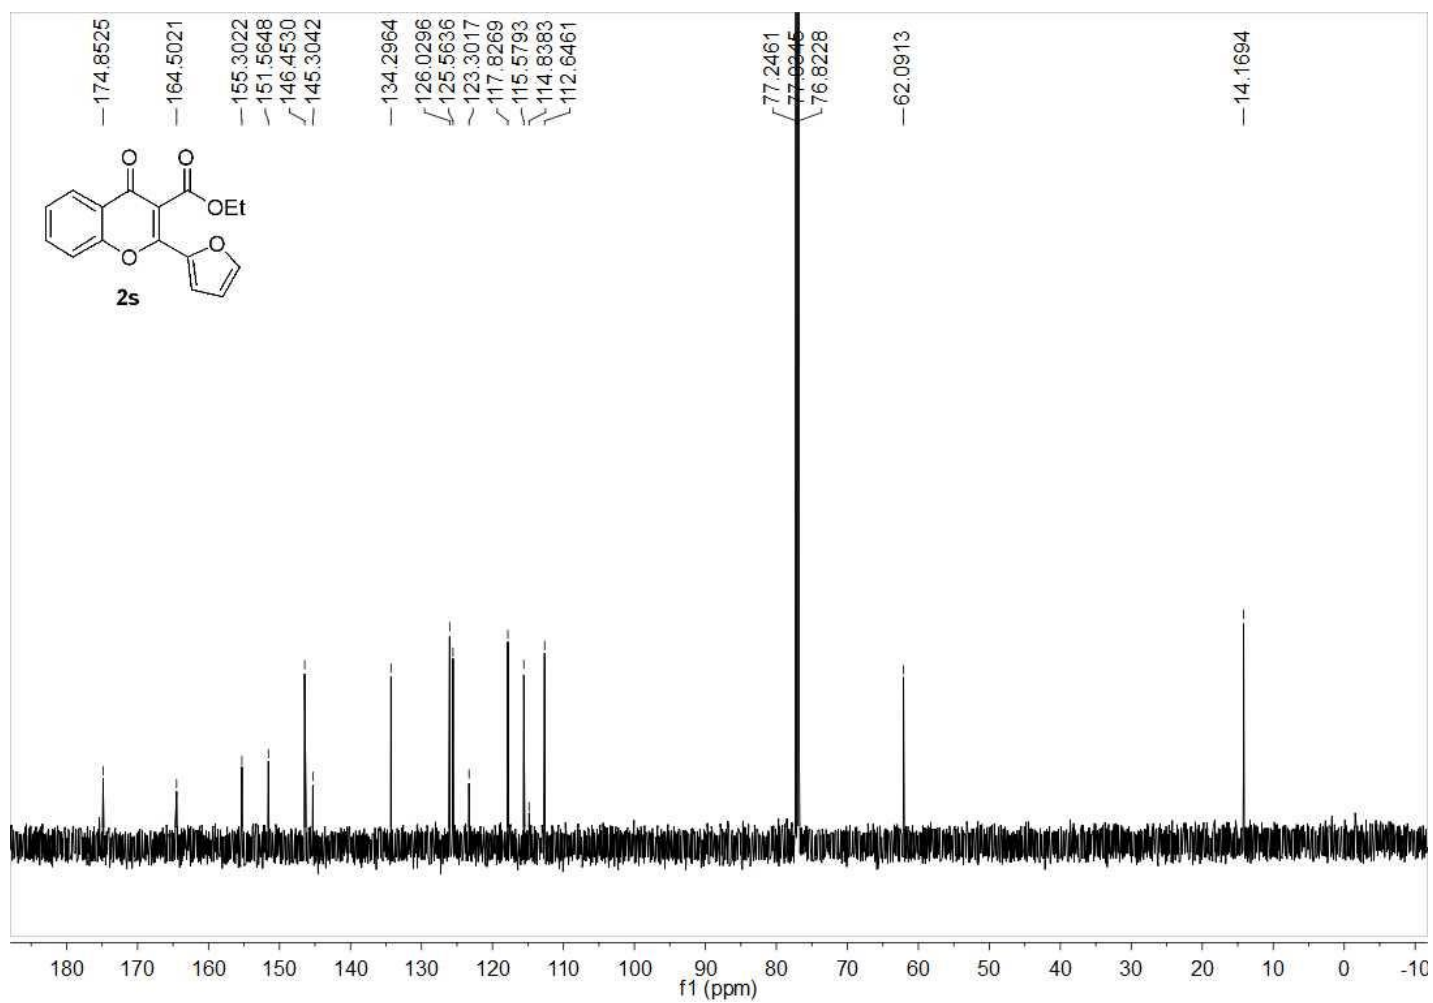

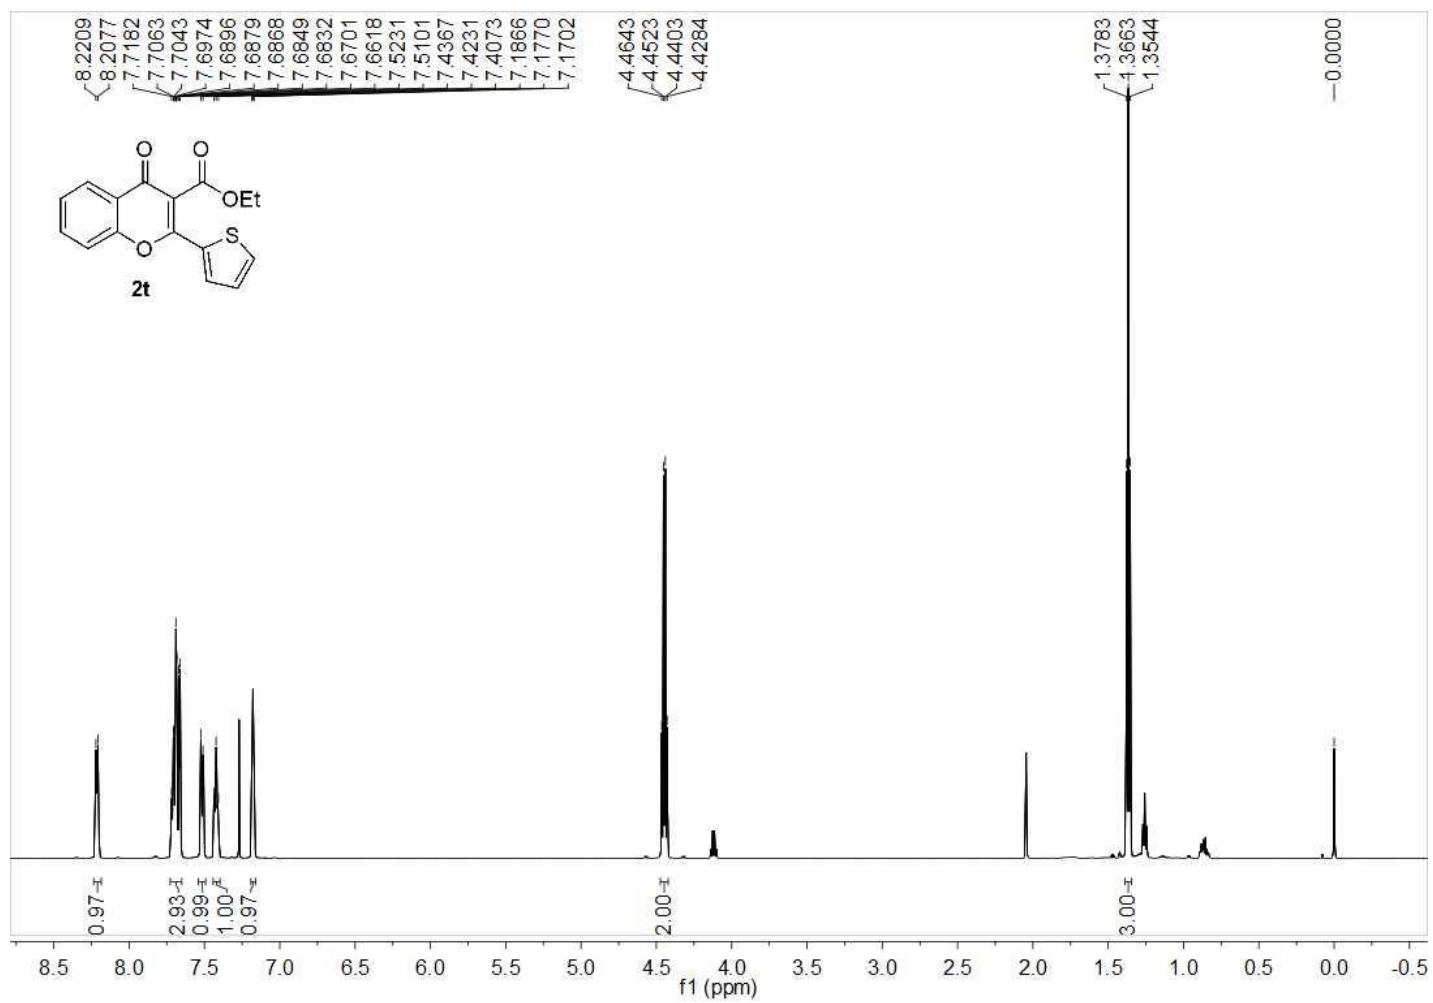

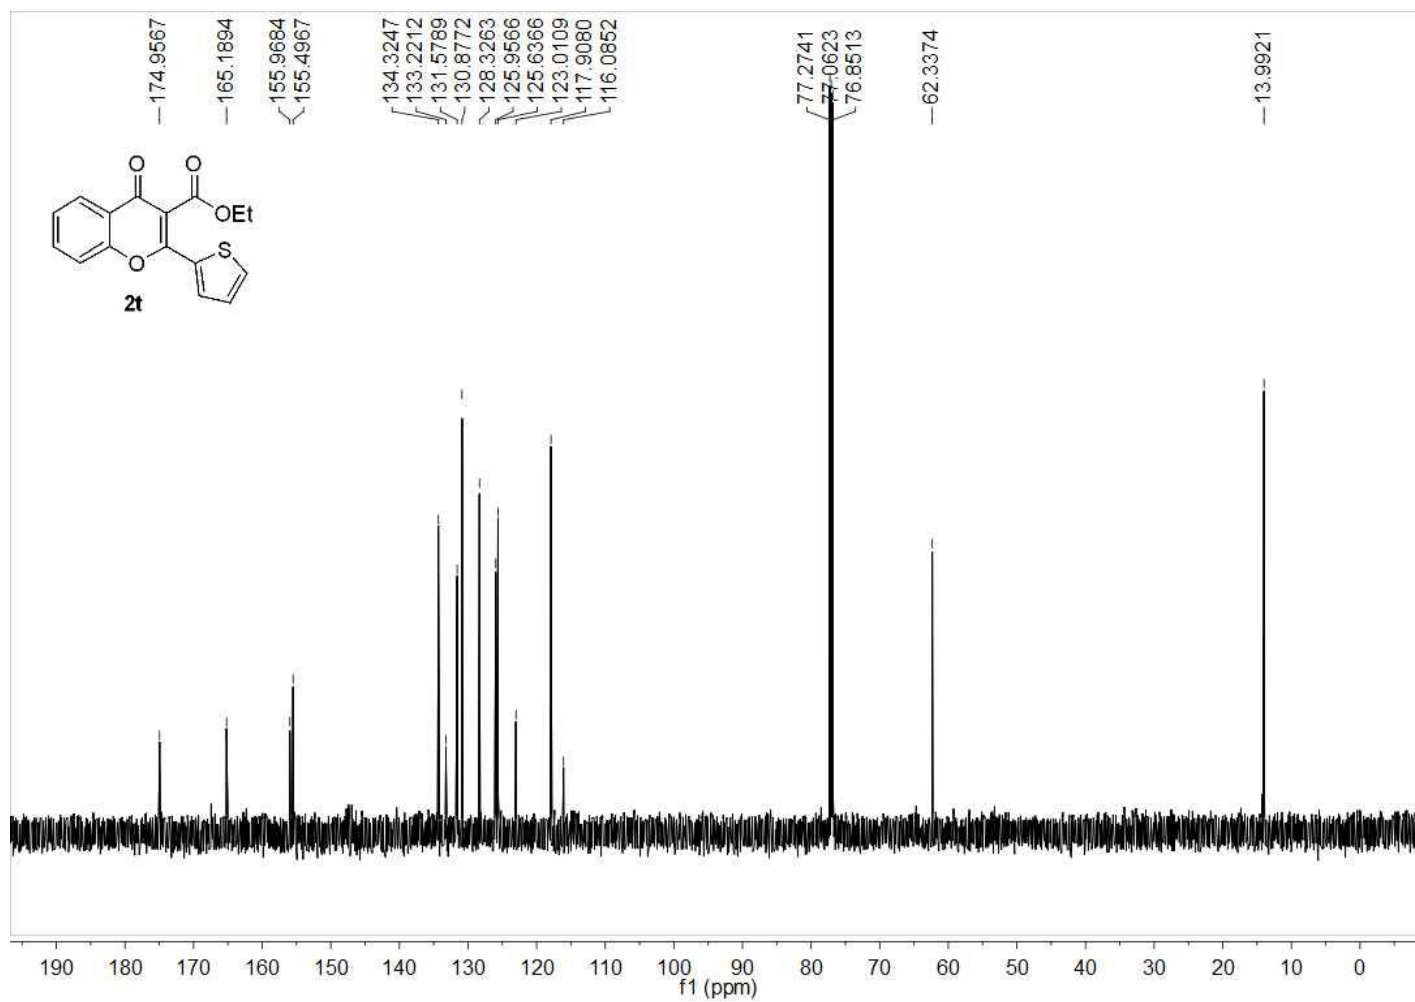

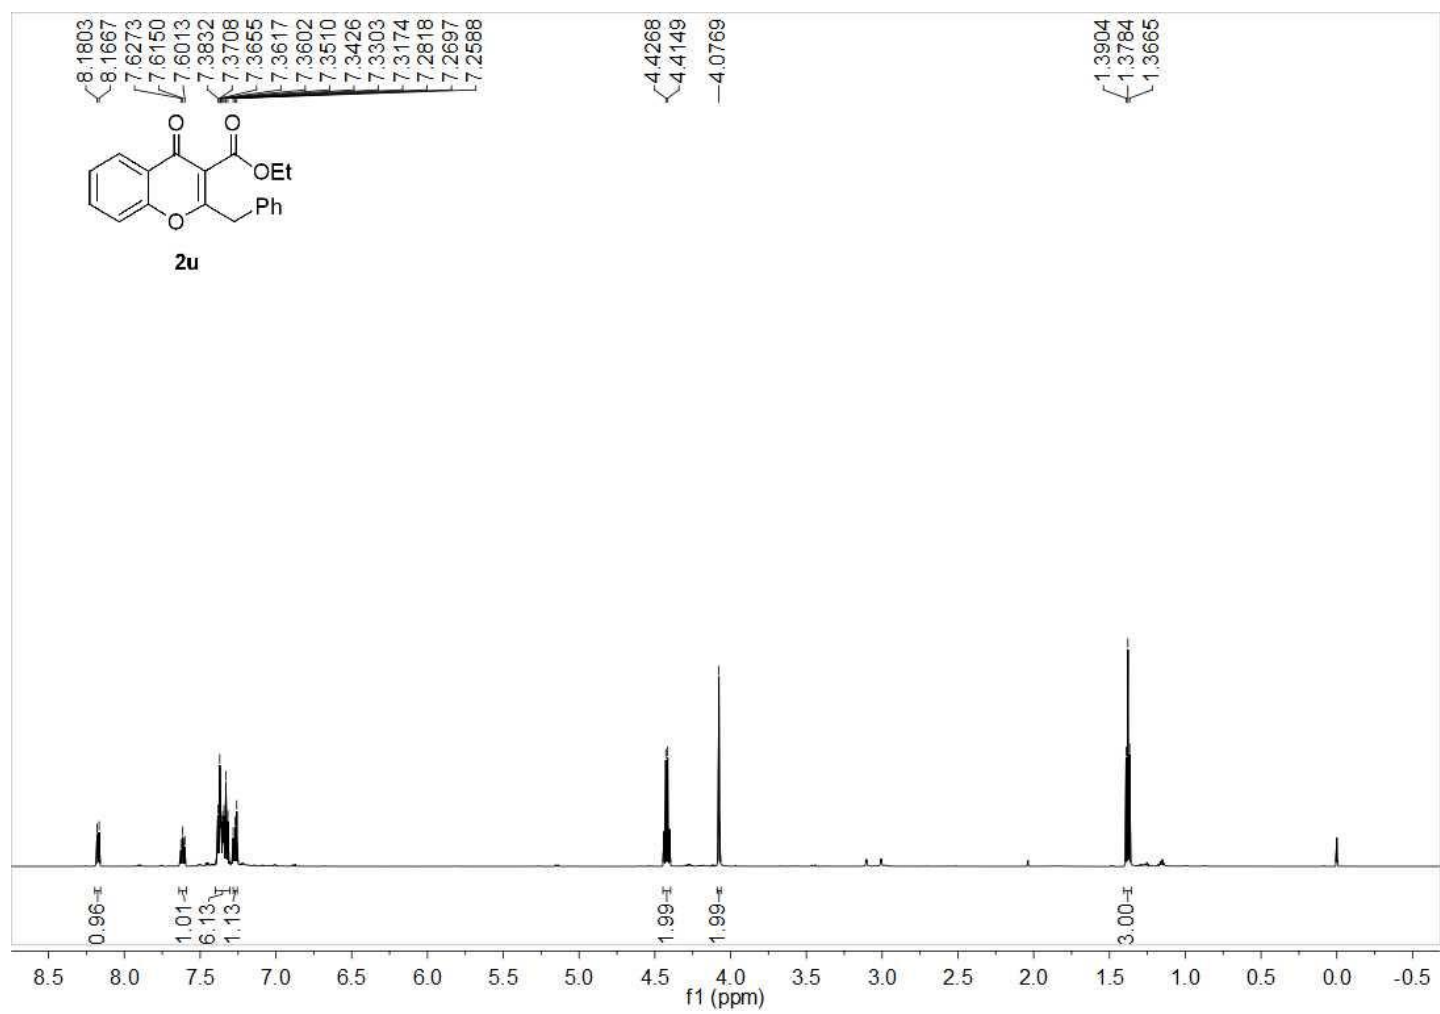

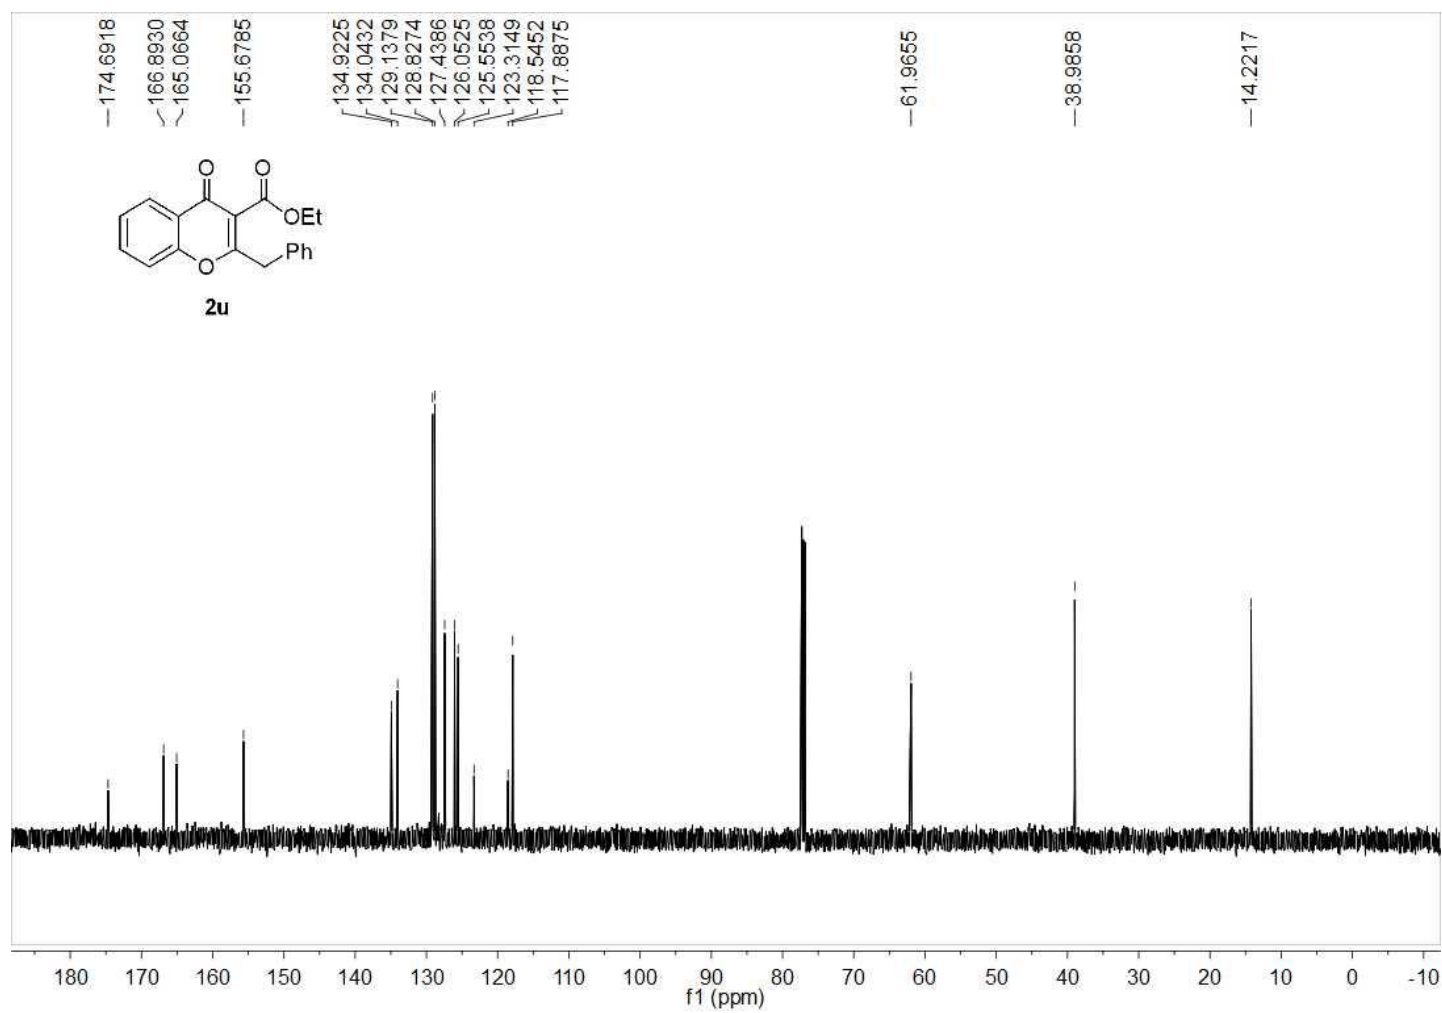



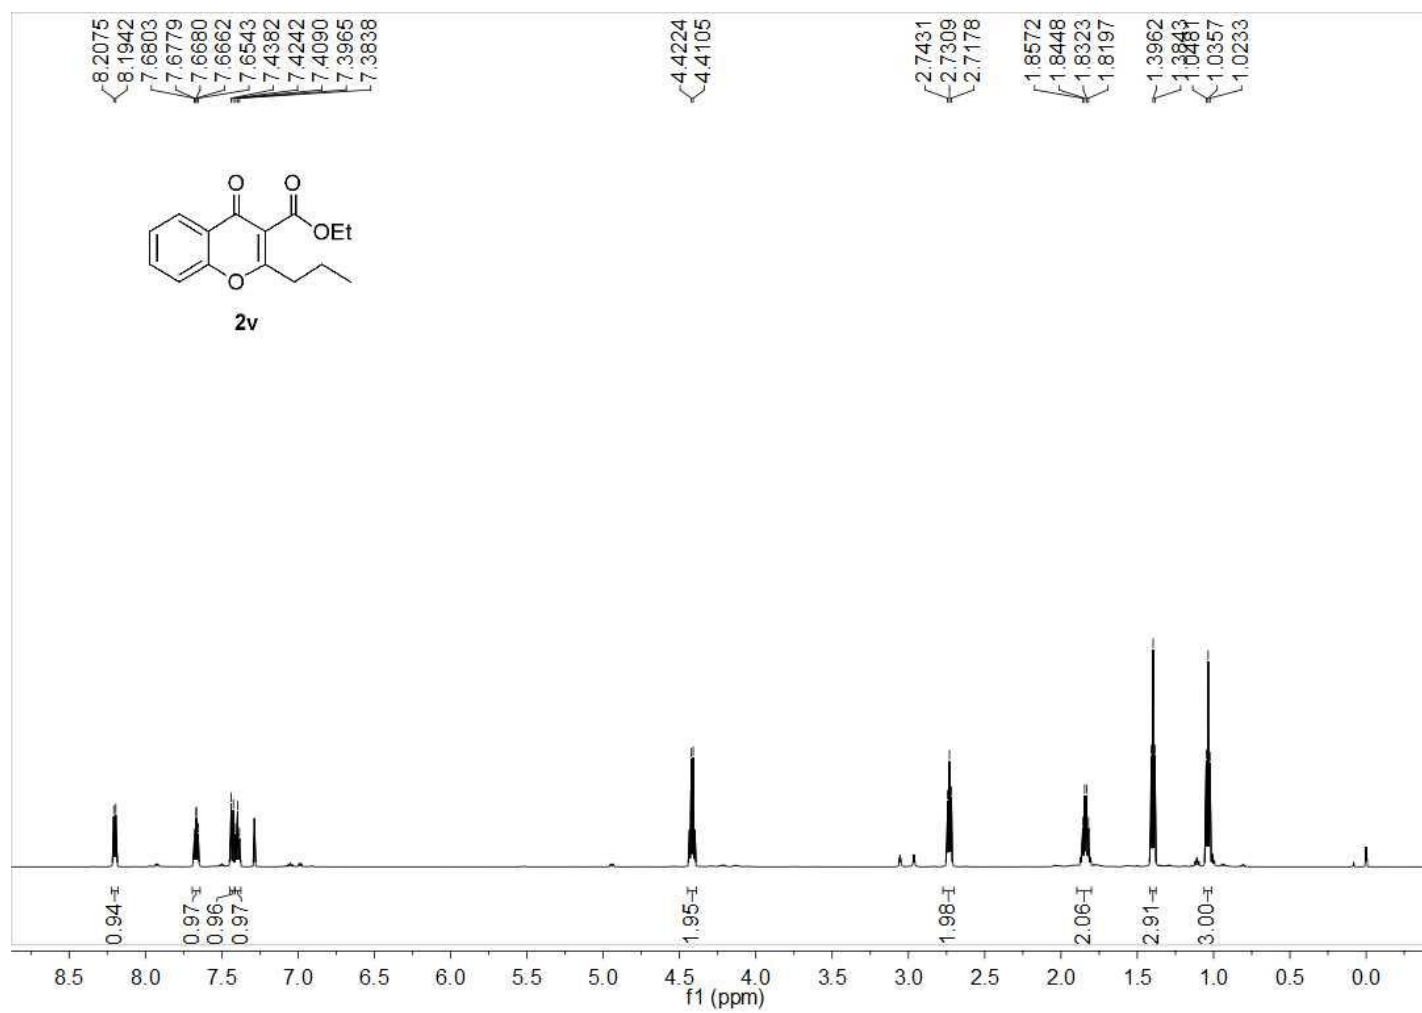

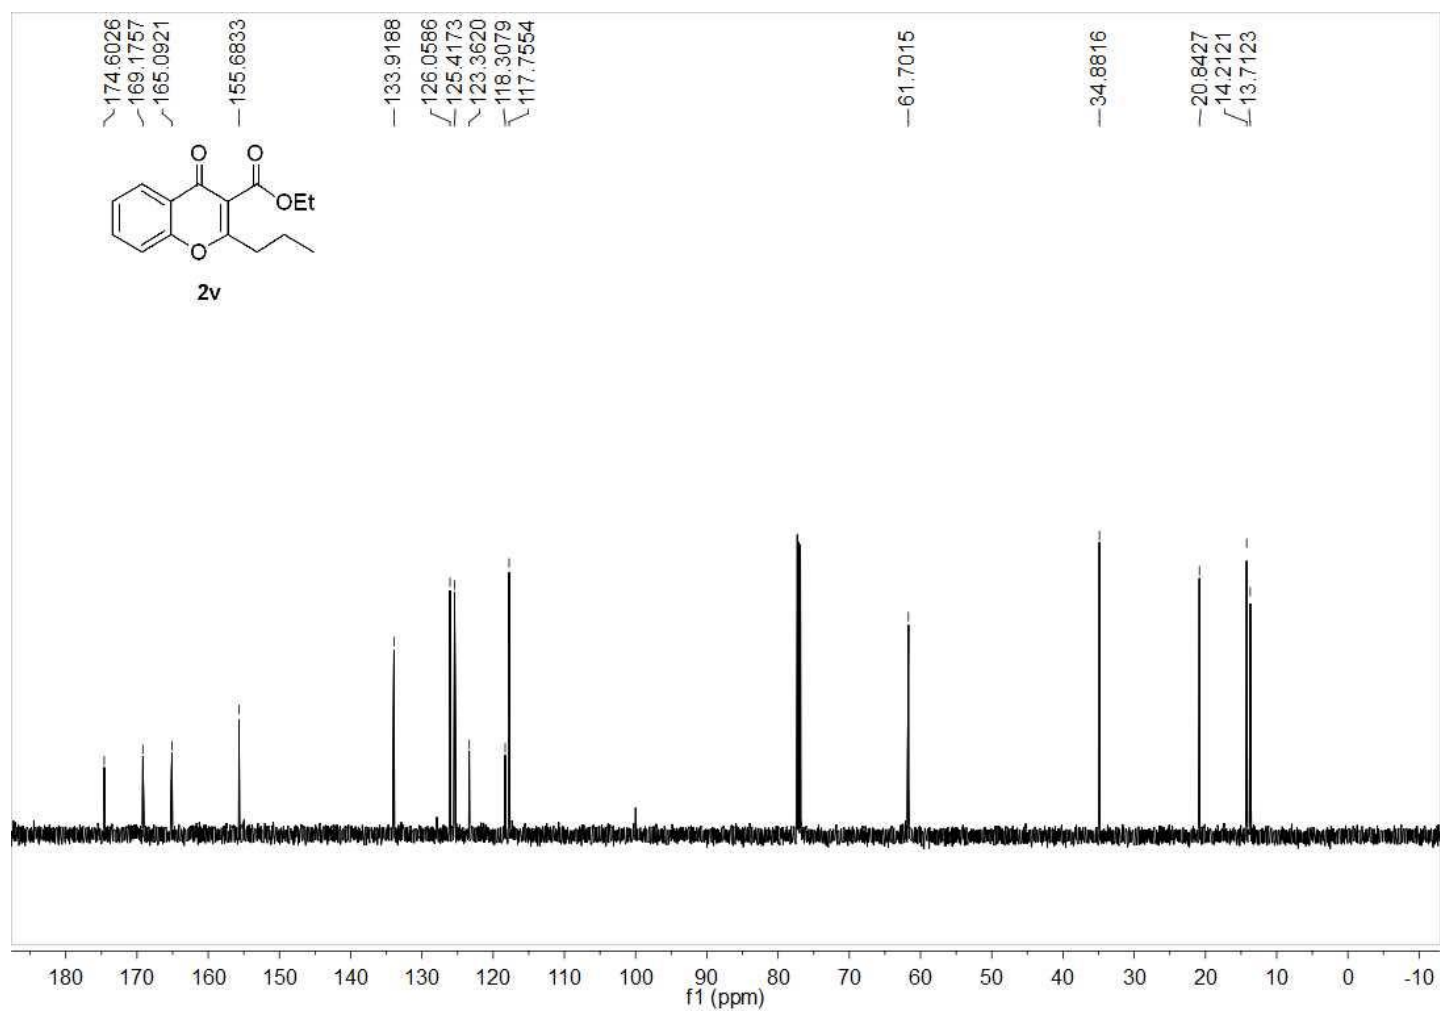

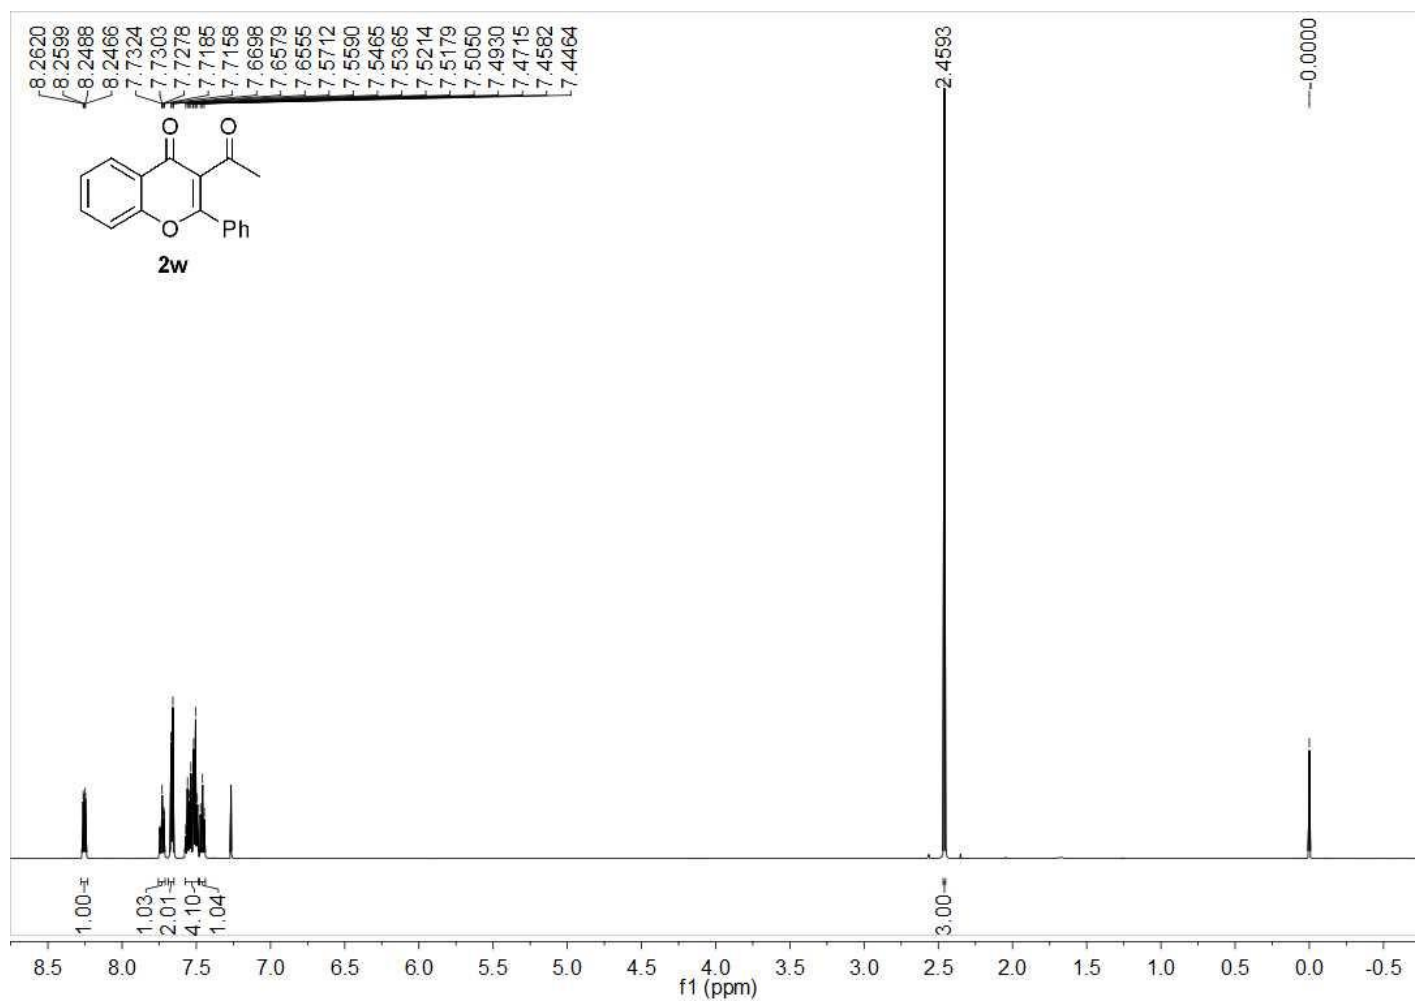

S130

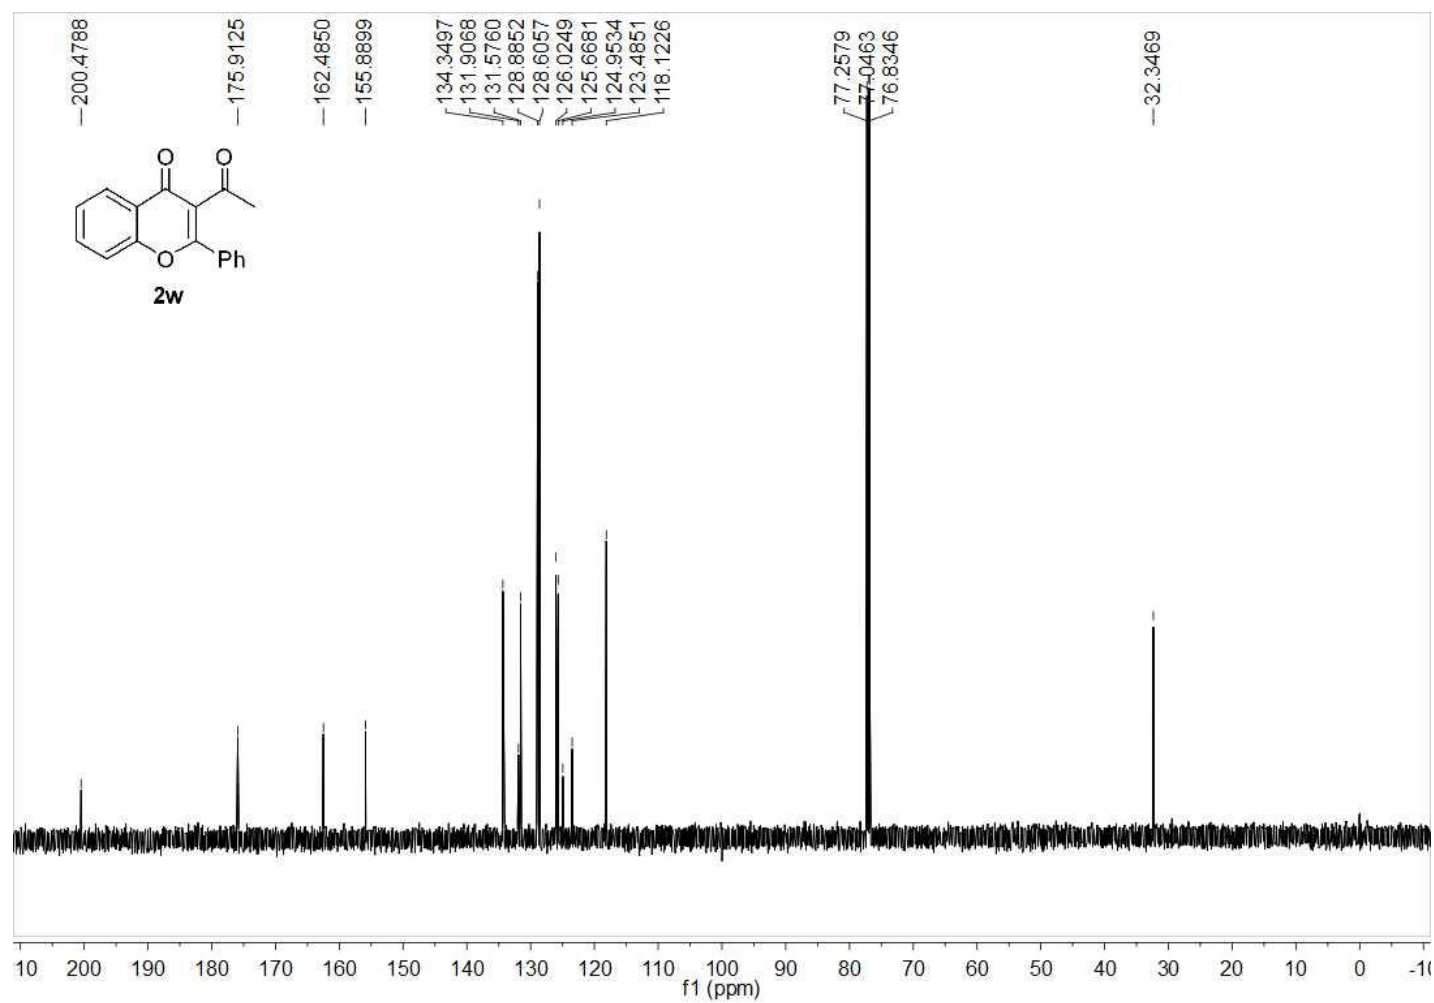

S131

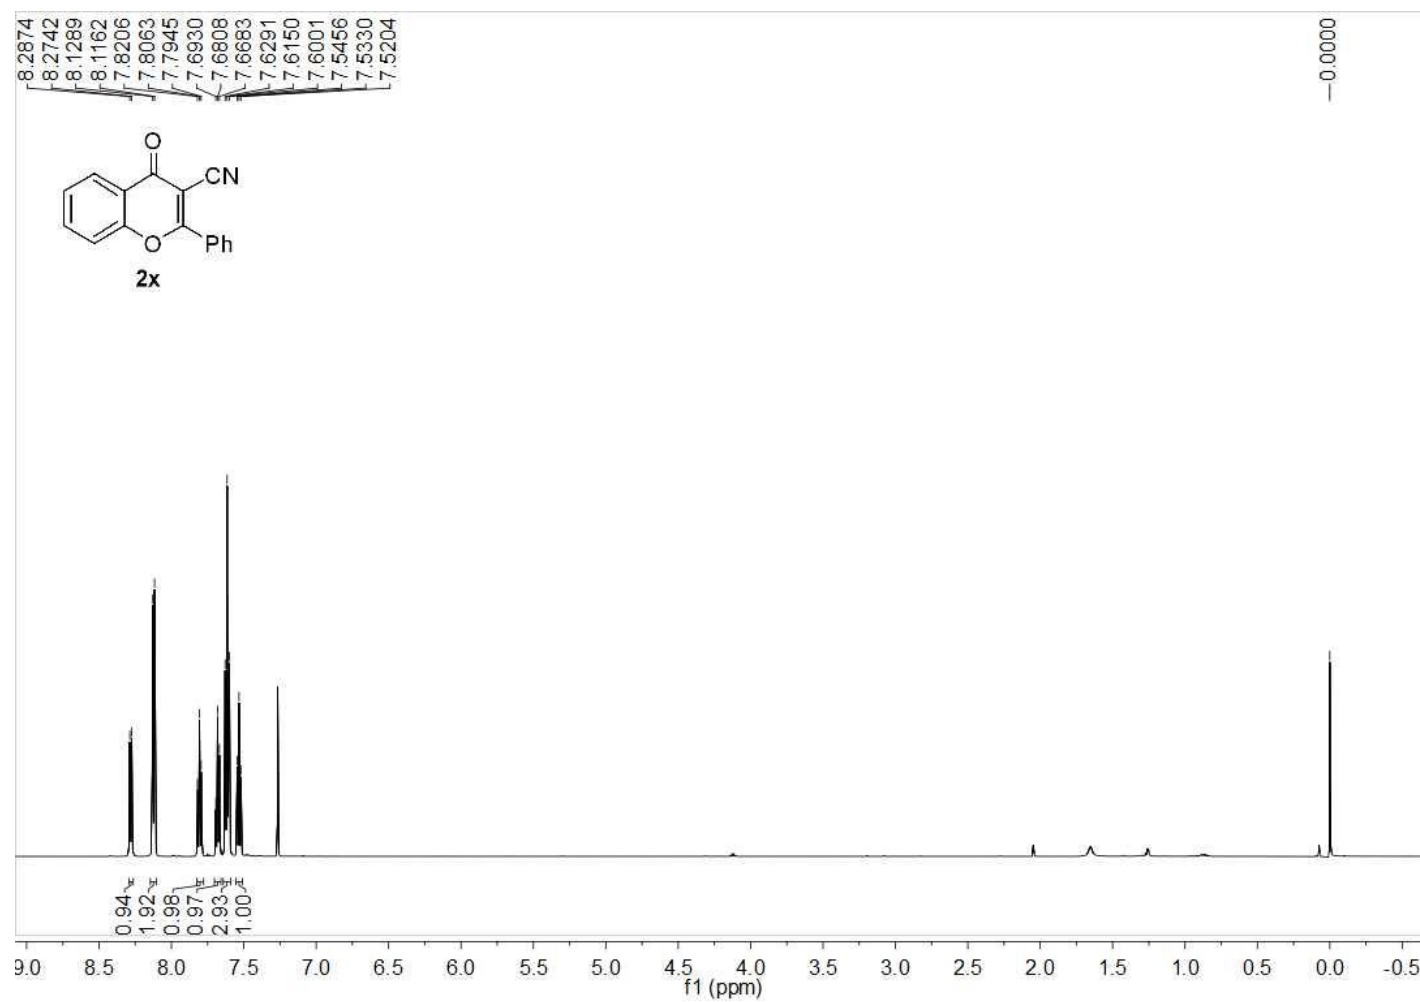

S132

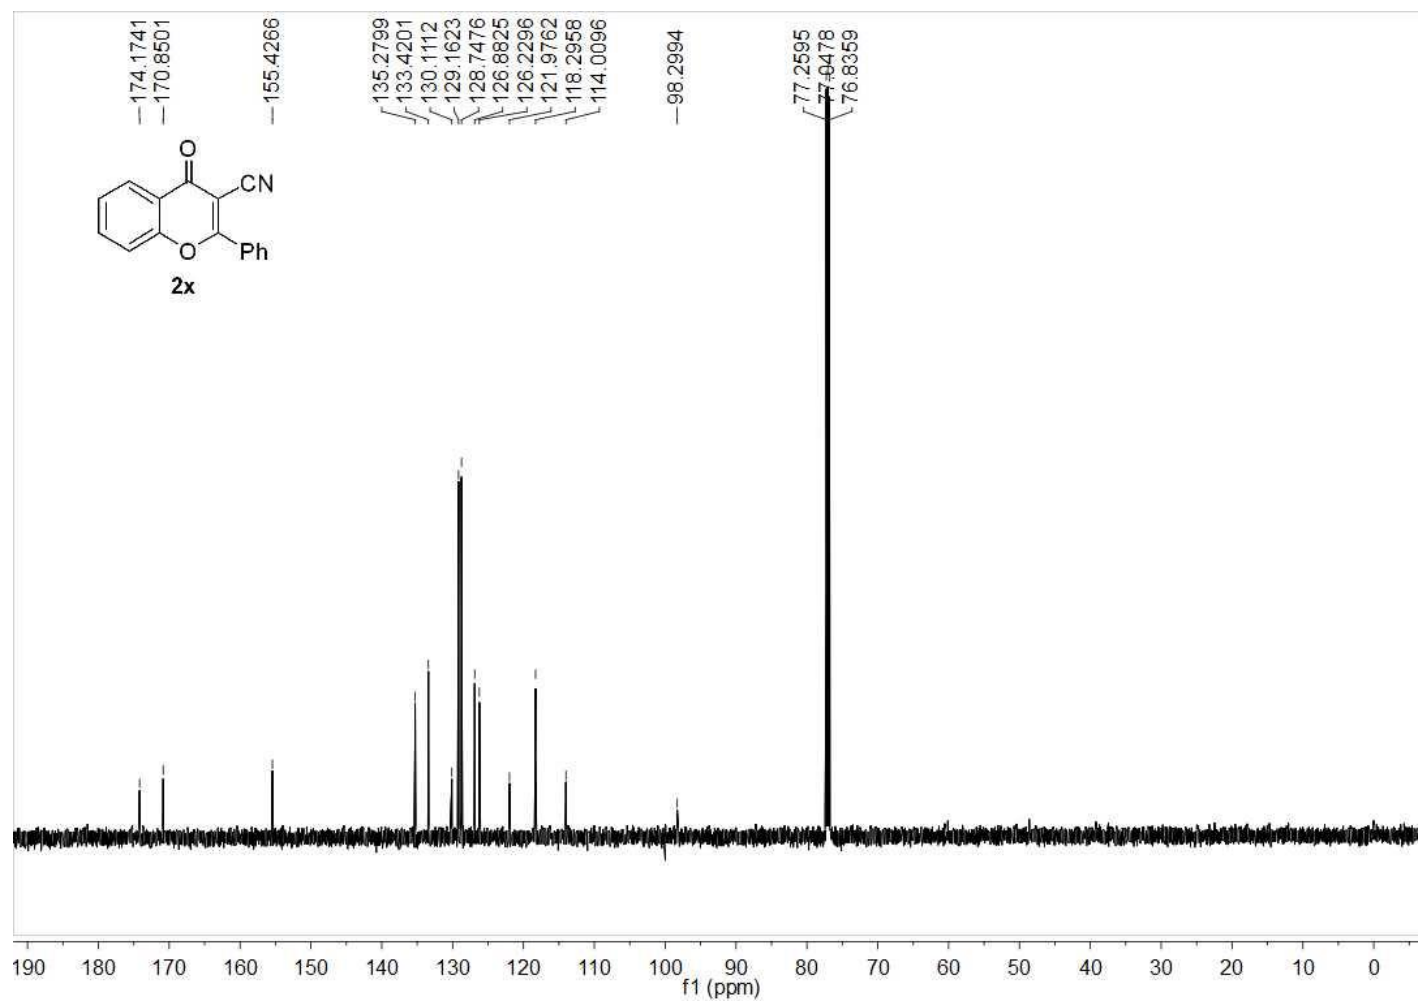

S133

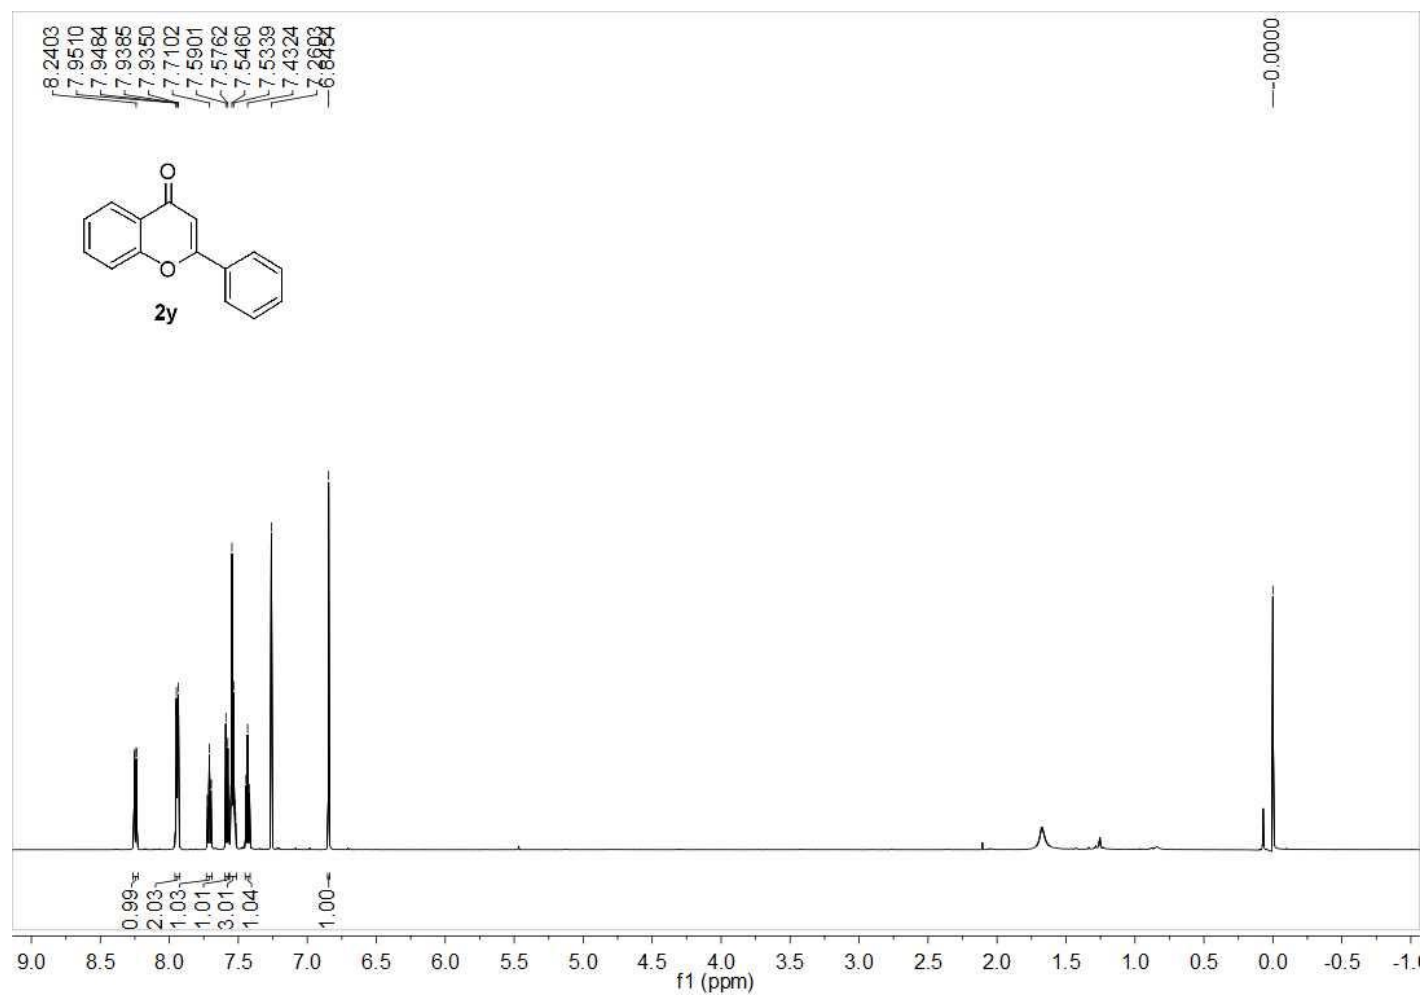

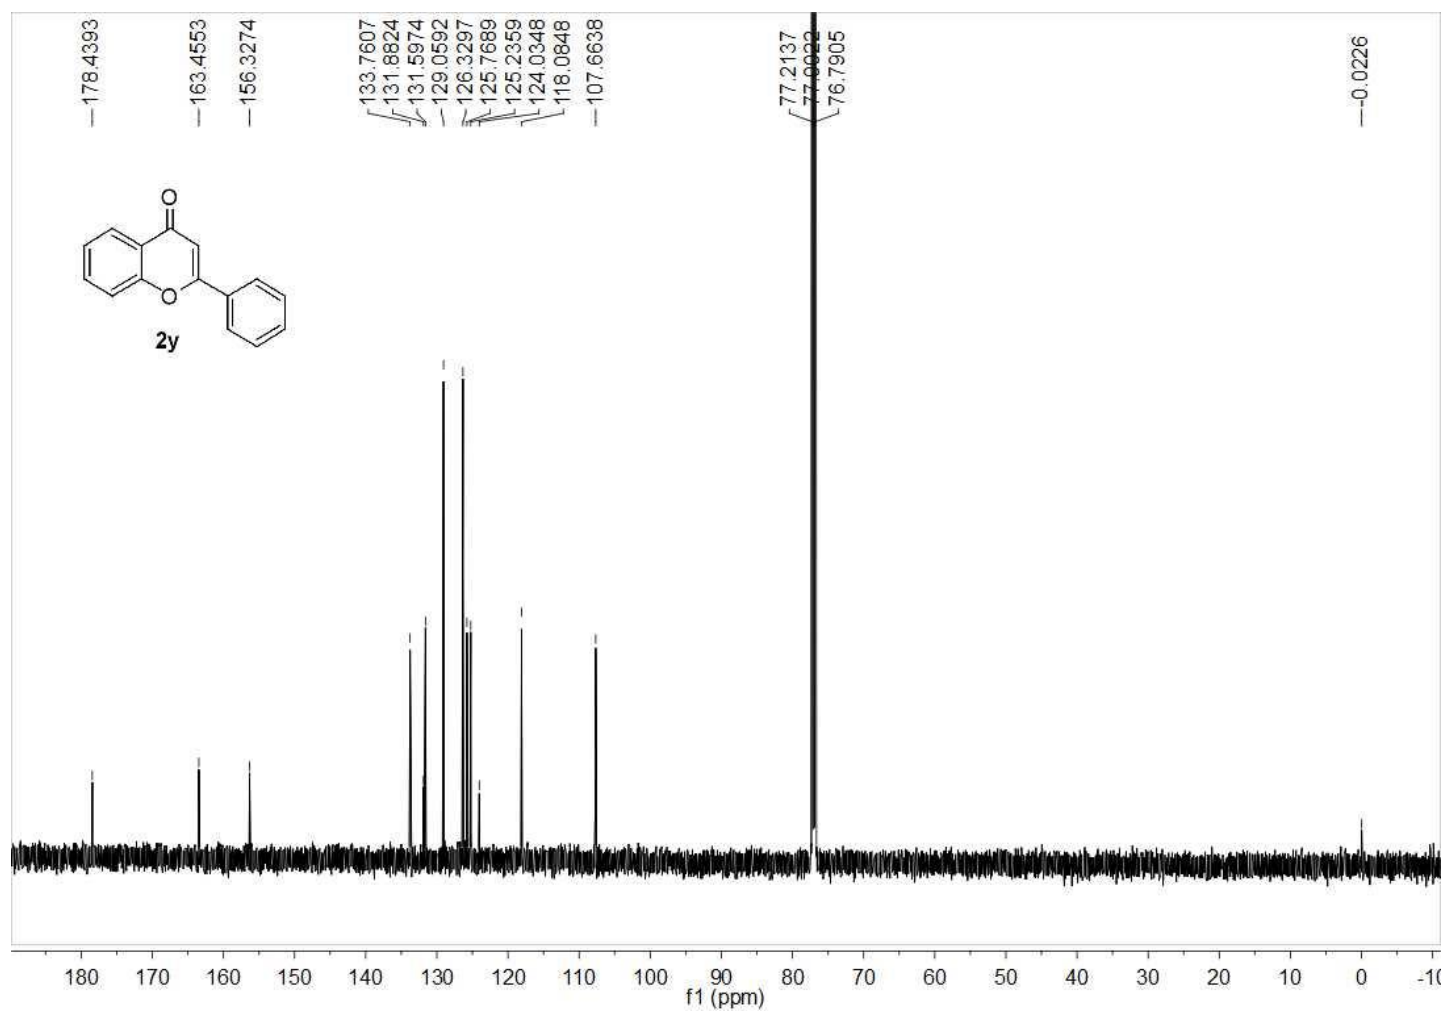

S135



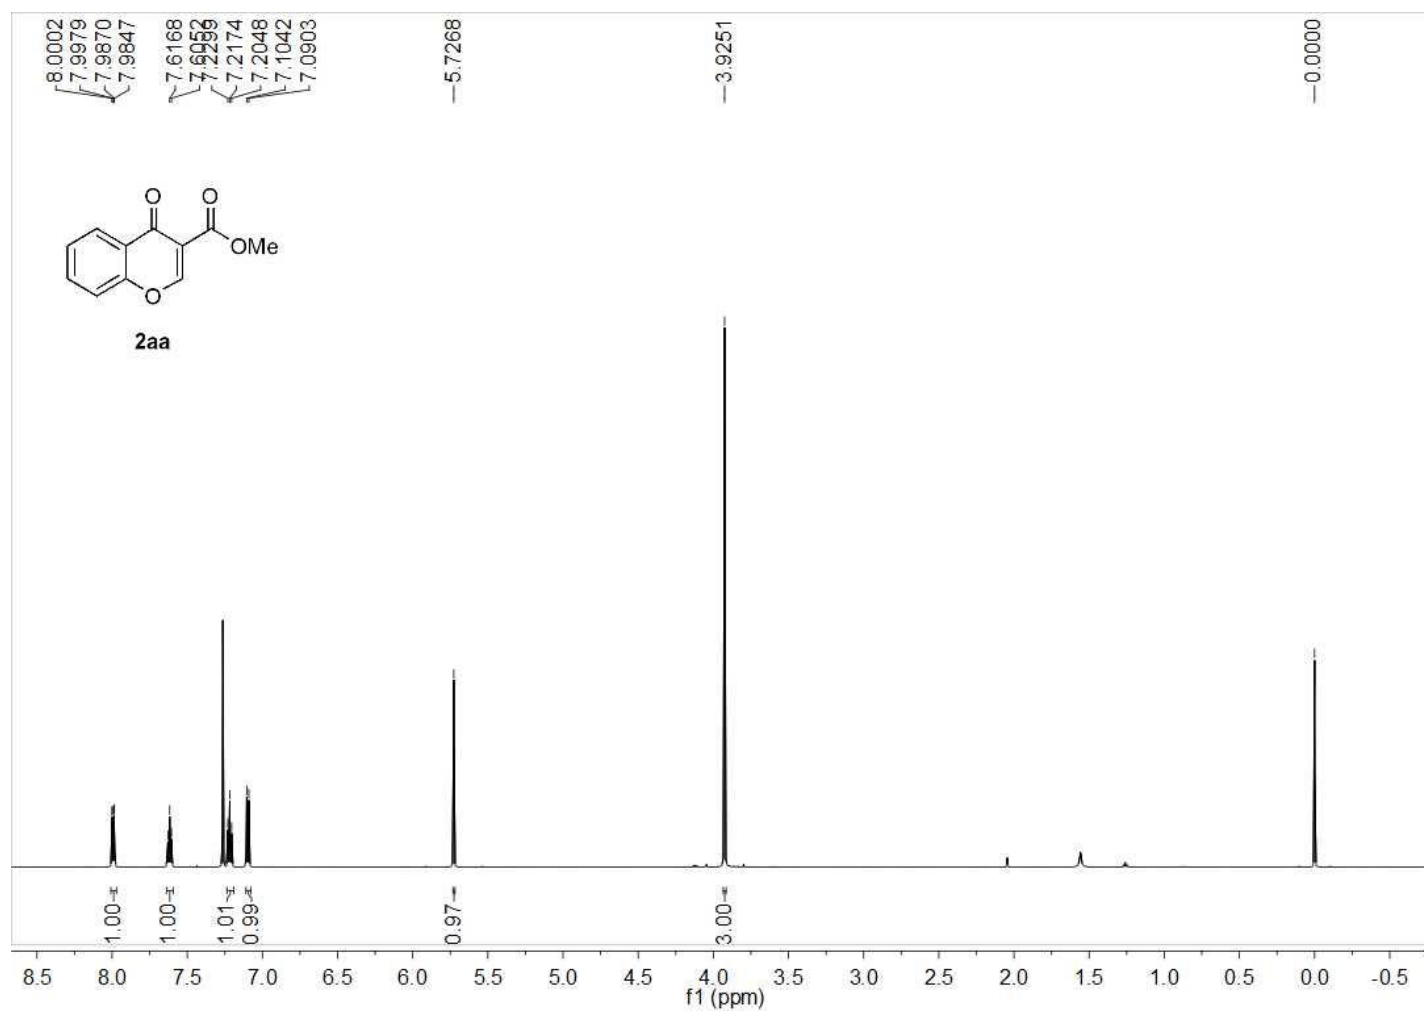

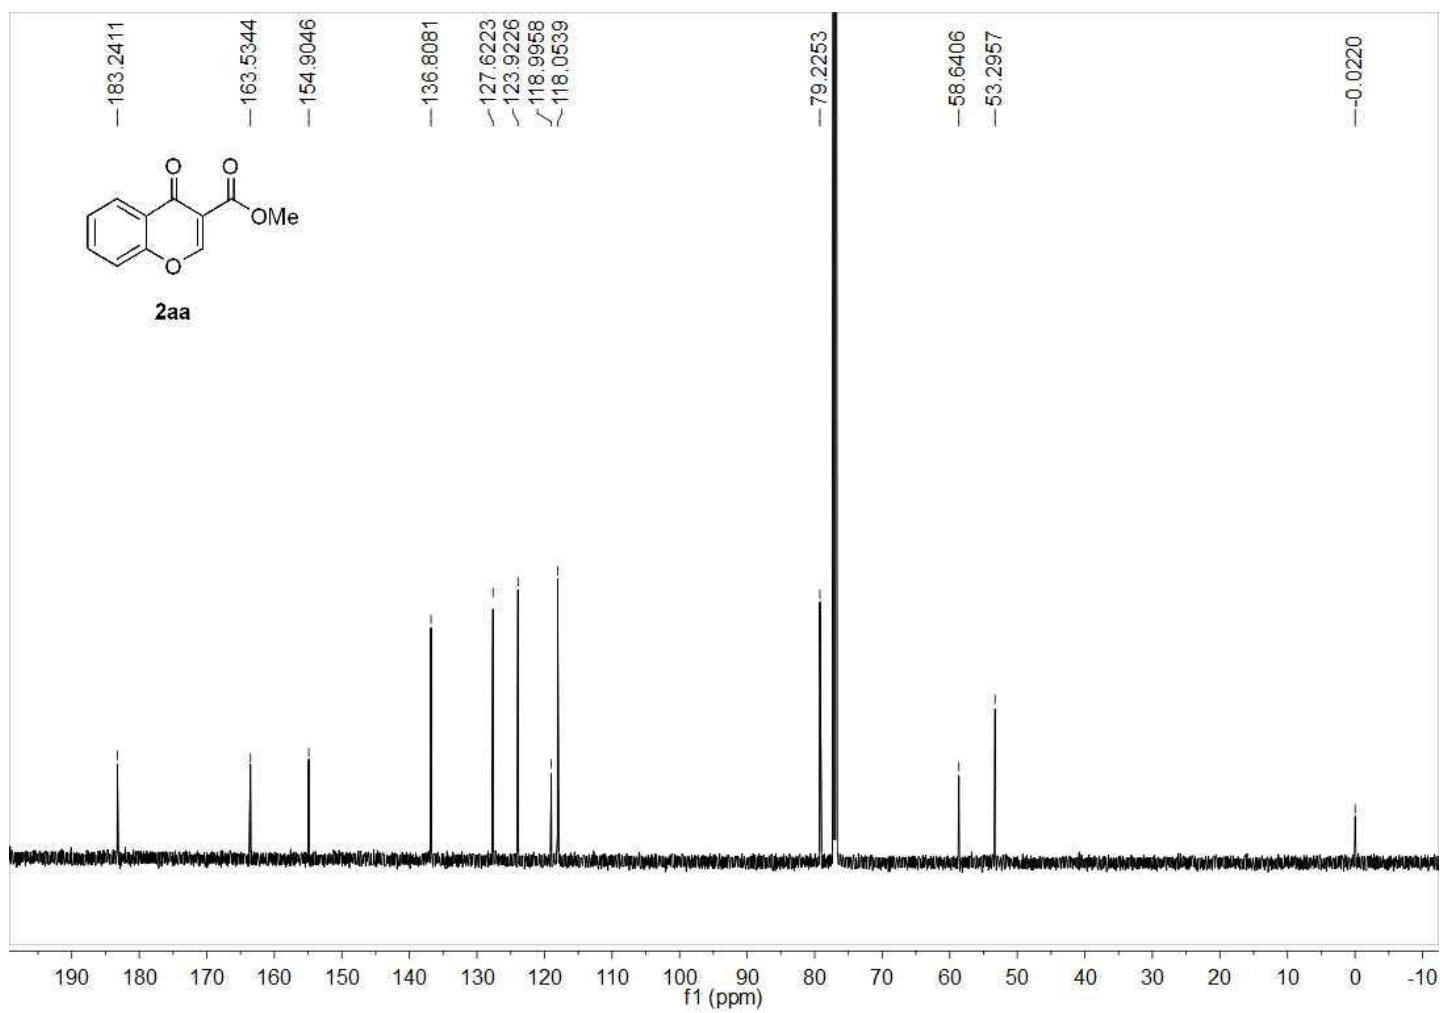

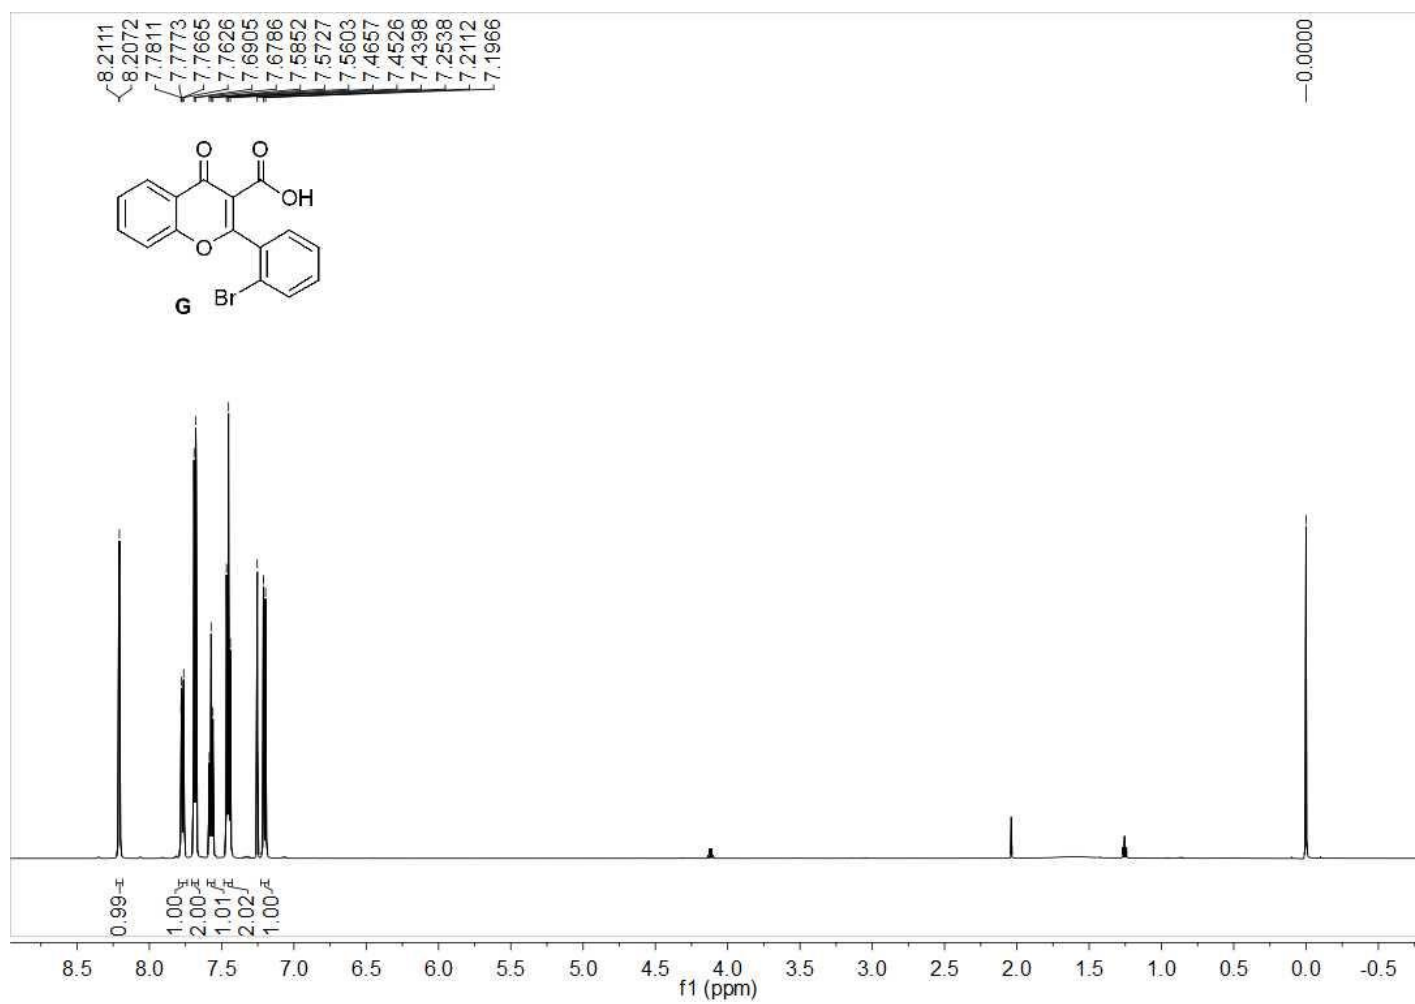

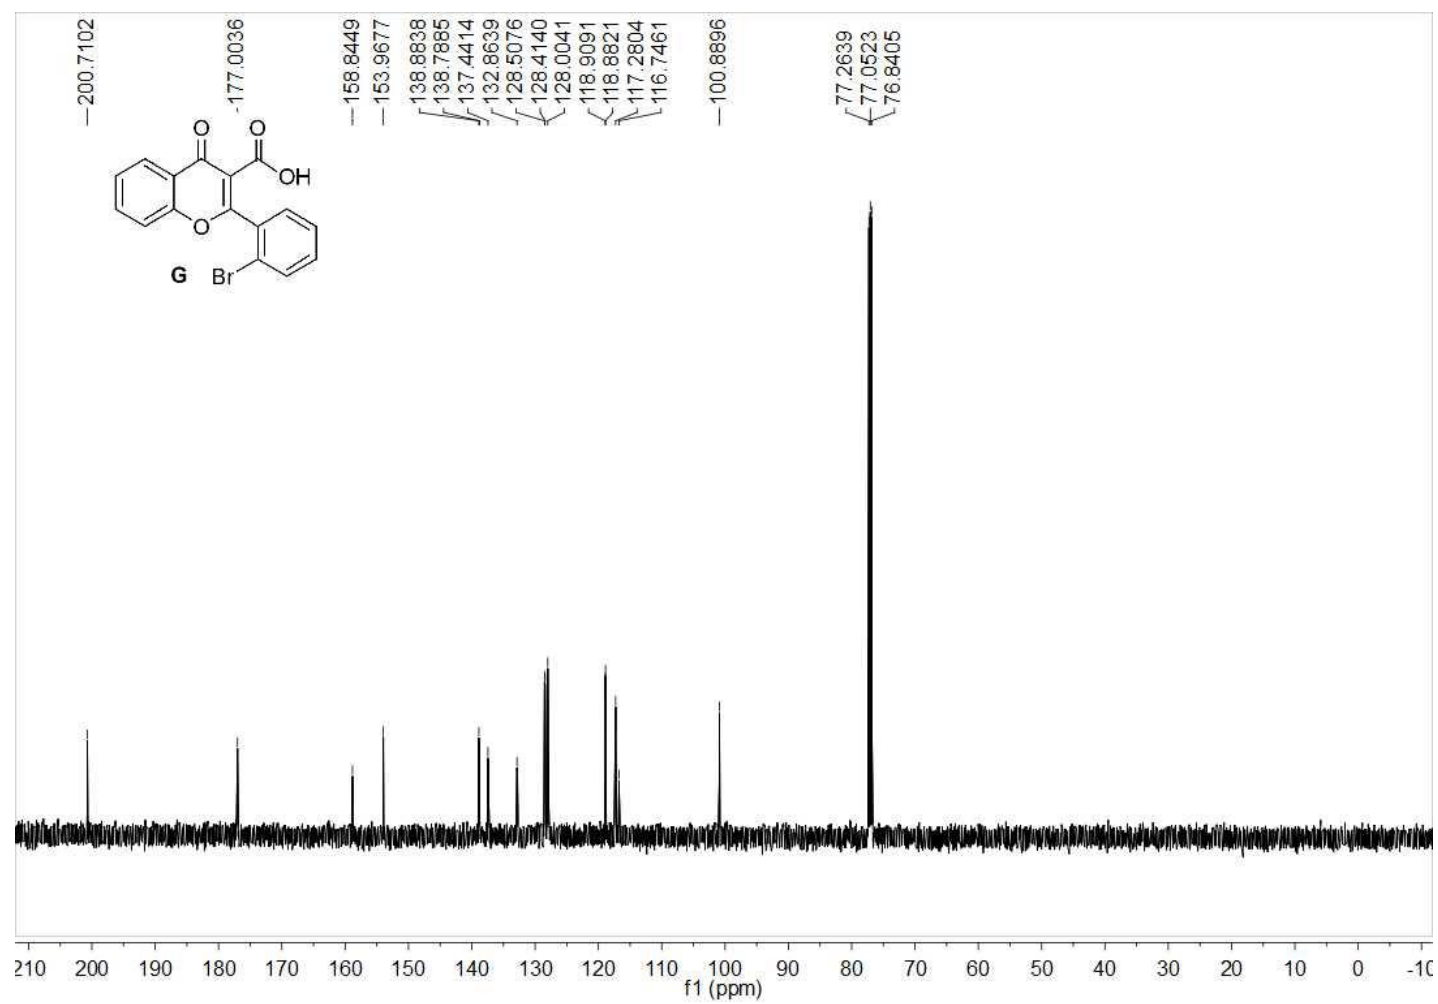

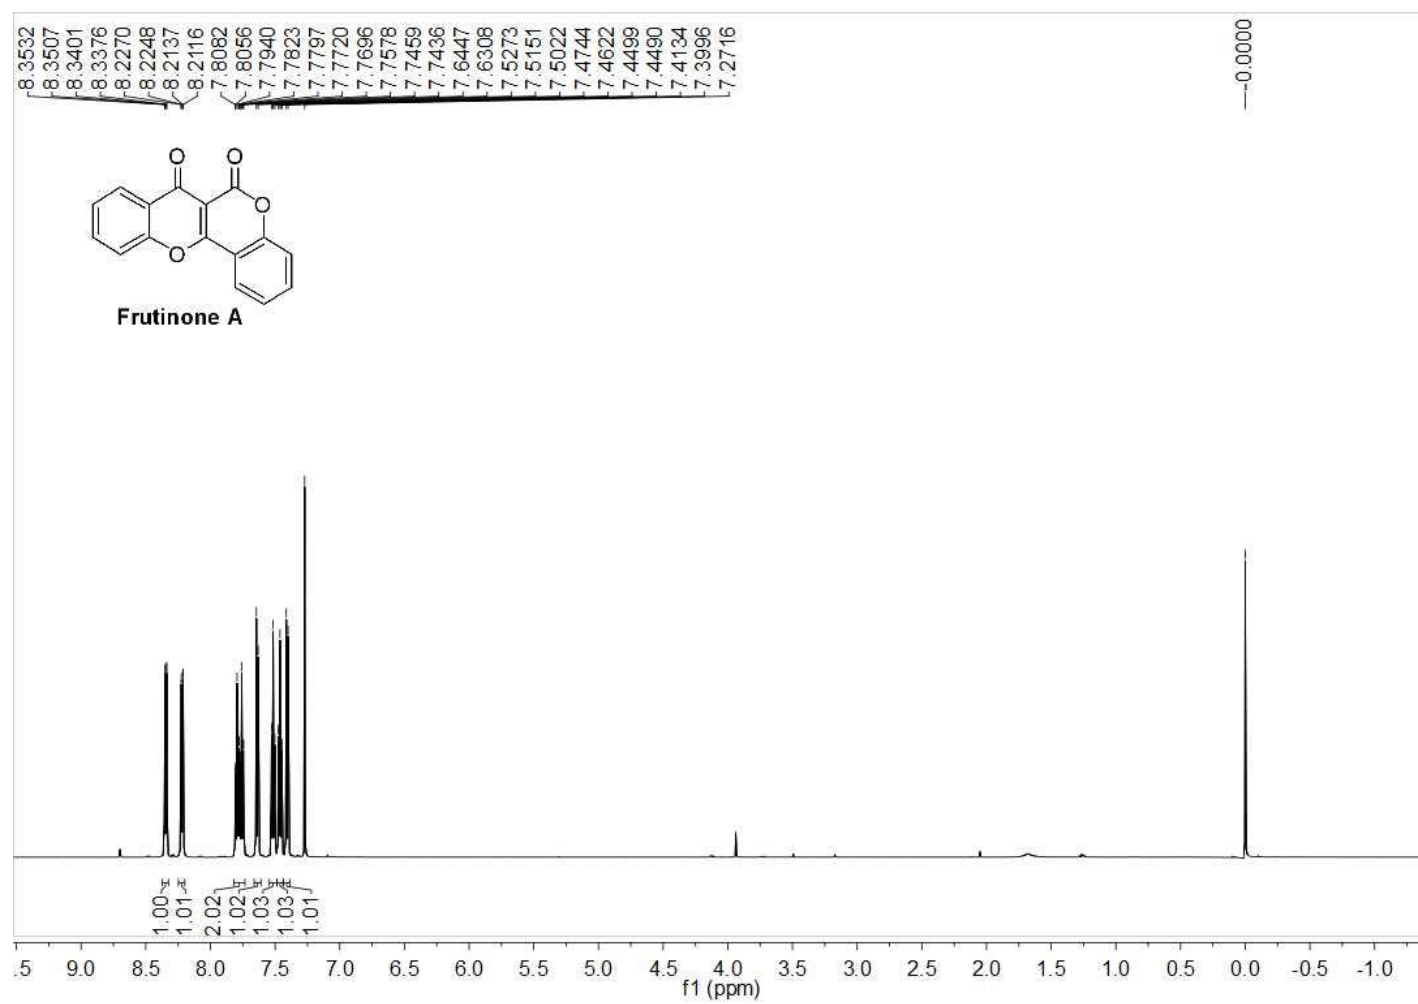

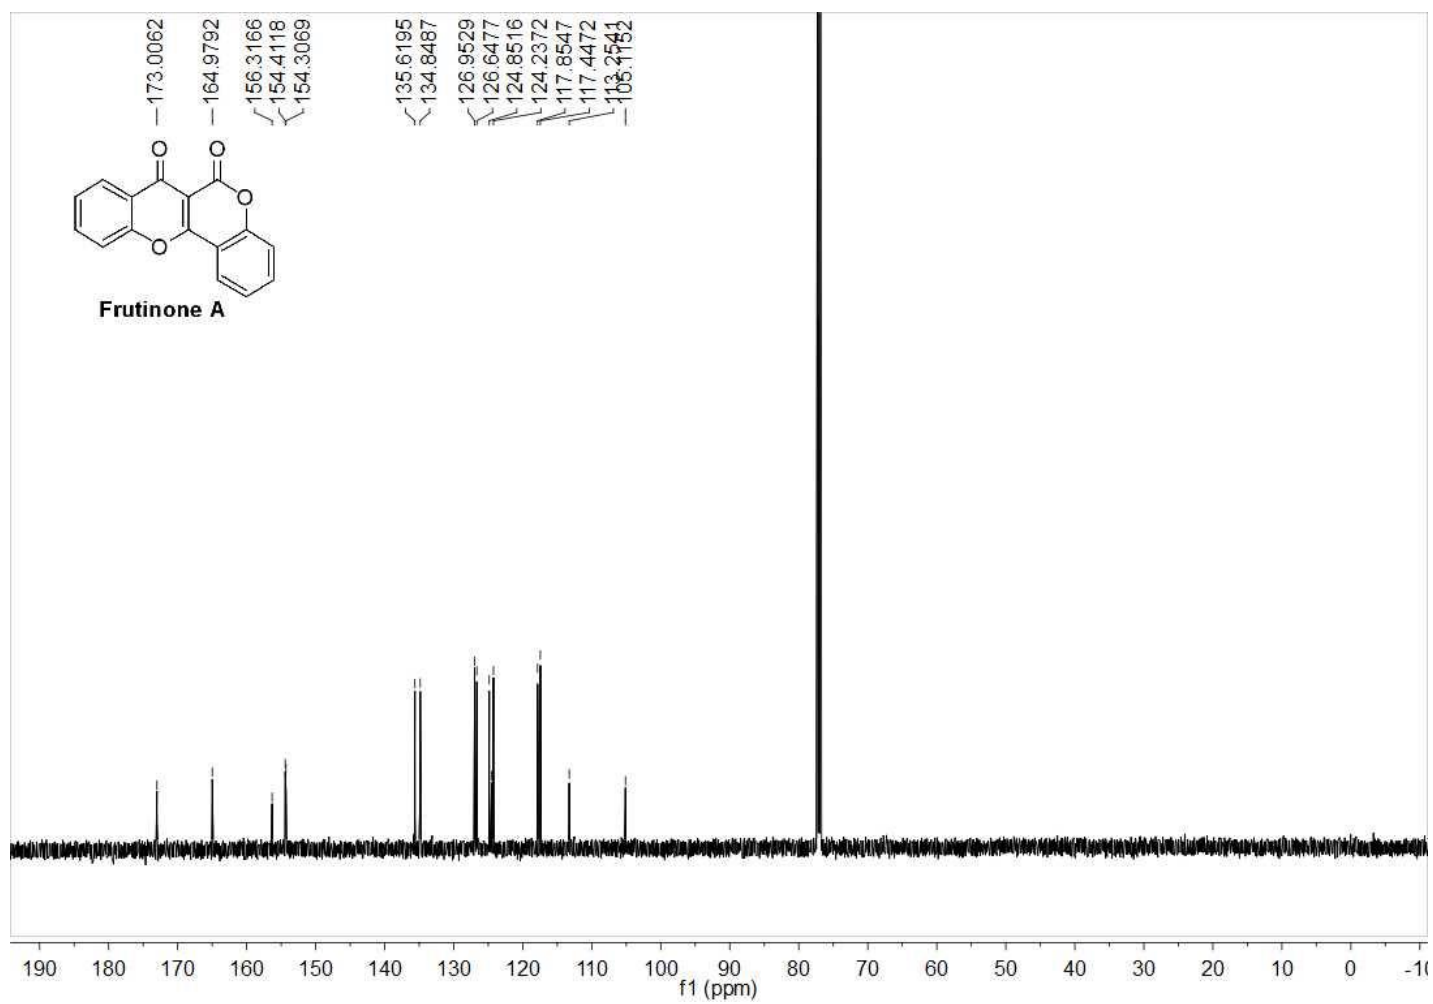

S141
